# Supplementary material for: Meta-analysis of RNA-Seq datasets highlights novel genes/pathways involved in fat deposition in fat-tail of sheep
Source: Front Vet Sci. 2023 May 12;10:1159921. doi: 10.3389/fvets.2023.1159921 (PMC10213422; doi:10.3389/fvets.2023.1159921)
Supplement: Supplementary file 2 [file Table_2.XLSX]

## Sheet: Meta-Analysis
Supplementary File S2: Results of the differential expression analysis per study along with meta-analysis.
All.ID	Gene Name	fishcomb.adjpval	invnormcomb.adjpval
ENSOARG00020011920		1.18886e-06	6.63636e-05			Up-regulated genes in fat-tailed breeds with the same expression pattern in most of studies
ENSOARG00020004397		0.000727197	0.00515615			Down-regulated genes in fat-tailed breeds with the same expression pattern in most of studies
ENSOARG00020018704	SCUBE2	5.46656e-05	0.0103827
ENSOARG00020018570	RSPO3	0.0374642	0.0322696
ENSOARG00020015168		1.2171e-09	1.97317e-08
ENSOARG00020025771	TNNC1	0	3.492e-08
ENSOARG00020005649	RGCC	0.000101674	0.00107319
ENSOARG00020021817	SKAP1	0.00122811	0.00141407
ENSOARG00020024099		0.0037717	0.00298285
ENSOARG00020020417	HSD11B1	0.00504962	0.00322253
ENSOARG00020018740		0.00122811	0.00344104
ENSOARG00020021969	TMA16	0.00735848	0.00653898
ENSOARG00020024228		0.00313213	0.00851208
ENSOARG00020021699		0.00961824	0.00892901
ENSOARG00020026375		0.000592537	0.0109373
ENSOARG00020022120	TMEM265	0.0132672	0.0109373
ENSOARG00020003933		0.00103331	0.0153348
ENSOARG00020017216	RBP4	0.00897758	0.0154843
ENSOARG00020002966	ACP6	0.00951209	0.0180888
ENSOARG00020008743	SPTBN2	0.0067136	0.0190747
ENSOARG00020023823	CMC1	0.0131596	0.0214666
ENSOARG00020020958		0.00508258	0.0237432
ENSOARG00020018054		0.0288006	0.0237432
ENSOARG00020026372	ADIRF	0.0117992	0.0265407
ENSOARG00020020454	RPL36AL	0.00957706	0.0277683
ENSOARG00020012987	SDC4	0.0408995	0.0283497
ENSOARG00020022277	EIF4EBP3	0.00711426	0.0306216
ENSOARG00020014591		0.0069235	0.0322034
ENSOARG00020000763	DDX39A	0.0219855	0.0346368
ENSOARG00020001473	HYI	0.00313213	0.0371991
ENSOARG00020015967	EIF1AX	0.0376268	0.0403325
ENSOARG00020017534		0.000227305	0.0436053
ENSOARG00020014613	SERPINE1	0.000826751	0.0442159
ENSOARG00020003005		1.24847e-06	1.19812e-05
ENSOARG00020022661		5.79454e-09	1.28222e-05
ENSOARG00020012622		6.34447e-06	2.30983e-05
ENSOARG00020023615	MT1A	1.2171e-09	6.61078e-05
ENSOARG00020025573	PENK	1.92595e-05	8.40811e-05
ENSOARG00020021607	Metazoa_SRP	4.74622e-06	8.63845e-05
ENSOARG00020024296		3.33319e-05	0.000118224
ENSOARG00020023648	MT1C	0.000455271	0.000168373
ENSOARG00020004475	ISYNA1	3.57851e-05	0.000196223
ENSOARG00020012955		1.37625e-05	0.000276242
ENSOARG00020008451	NUCKS1	3.33319e-05	0.000343731
ENSOARG00020021096	CDC26	0.000111382	0.000421509
ENSOARG00020020436		0.00110134	0.000421509
ENSOARG00020021453	FAM167B	5.08885e-06	0.000571849
ENSOARG00020012389	EIF5B	6.00513e-05	0.000609355
ENSOARG00020007710	DPT	6.01049e-06	0.000736792
ENSOARG00020003305	DYNLRB2	0.000120478	0.000964255
ENSOARG00020000917	S100A1	4.06129e-06	0.00143634
ENSOARG00020008920	GPR176	0.0013978	0.00166561
ENSOARG00020005536		0.00439351	0.00208744
ENSOARG00020000908	S100A13	3.2719e-05	0.00215936
ENSOARG00020007664		0.00020119	0.00215936
ENSOARG00020000639	HSPA6	0.00151393	0.00215936
ENSOARG00020025429	RPL37A	0.00165732	0.00224675
ENSOARG00020017106		0.00620454	0.0022609
ENSOARG00020021632	Metazoa_SRP	8.22635e-06	0.00251186
ENSOARG00020024433	TMEM132C	0.00160418	0.00266032
ENSOARG00020010462	RTF1	0.000193389	0.00273591
ENSOARG00020023664	MT2	2.79484e-06	0.00278058
ENSOARG00020008632		0.00150026	0.0039083
ENSOARG00020004572		0.00103331	0.00393851
ENSOARG00020012976	TEKT2	0.0016272	0.00394899
ENSOARG00020014797	GLYAT	0.00775446	0.00422024
ENSOARG00020018225	EPHX1	0.000589042	0.00427231
ENSOARG00020007966		0.00109382	0.00526647
ENSOARG00020001823		0.000193349	0.00606159
ENSOARG00020011198	CHMP2A	0.00383707	0.00619222
ENSOARG00020018998		0.00616909	0.0064278
ENSOARG00020012110	KCNG2	0.00645869	0.00676093
ENSOARG00020011363	RNaseP_nuc	0.00511035	0.00691671
ENSOARG00020001322		0.00619918	0.00732324
ENSOARG00020024603		0.000259258	0.00734088
ENSOARG00020024808		0.00228376	0.00734088
ENSOARG00020012498	MIEN1	0.0145997	0.00793621
ENSOARG00020002486	POLR2H	0.0069885	0.00830459
ENSOARG00020021260	POLR2G	0.0152808	0.00830459
ENSOARG00020004826		0.00405558	0.00839018
ENSOARG00020023295		0.00196983	0.00851208
ENSOARG00020023033	C4orf48	0.00597617	0.00890909
ENSOARG00020012287	RASL11A	0.00012718	0.00896508
ENSOARG00020001942	TFRC	3.33319e-05	0.00931868
ENSOARG00020014101	LUC7L3	0.00116756	0.00936788
ENSOARG00020013188		0.0023435	0.00973577
ENSOARG00020011816		0.0015919	0.00979035
ENSOARG00020005655		0.0018046	0.0113194
ENSOARG00020015586	FAM133B	0.00055966	0.0118992
ENSOARG00020002412	SURF1	0.00875133	0.0135011
ENSOARG00020004441	SLC7A4	0.00992588	0.0135011
ENSOARG00020017893		0.00439144	0.0136636
ENSOARG00020011207	CREM	0.00271351	0.0137237
ENSOARG00020026035		0.0038292	0.0144452
ENSOARG00020005473		0.00383707	0.0144452
ENSOARG00020014769	PSMG3	0.0103397	0.0144726
ENSOARG00020005646	CD63	0.0170034	0.0144726
ENSOARG00020004948		0.00112619	0.0152982
ENSOARG00020009978	BPI	0.00204065	0.0154945
ENSOARG00020003548		0.0143014	0.0169401
ENSOARG00020014377	EXOSC10	0.0037717	0.017257
ENSOARG00020004394	HBB	8.68595e-07	0.0175749
ENSOARG00020000843	S100A5	0.0158604	0.0181424
ENSOARG00020004268	ICAM3	0.0166502	0.0195631
ENSOARG00020006255	KCNJ8	0.0102748	0.019779
ENSOARG00020025540		0.00596781	0.0203505
ENSOARG00020006104		0.00227441	0.0205936
ENSOARG00020003395	DNAH11	0.0227718	0.0209988
ENSOARG00020019276	MRTFB	0.002588	0.0211171
ENSOARG00020004833	TAF3	0.00253669	0.0211395
ENSOARG00020003757		0.0073346	0.0227486
ENSOARG00020004393	GLIPR2	0.0170808	0.0227486
ENSOARG00020008622	RPL36	0.00296606	0.0233093
ENSOARG00020020882	UBXN1	0.027712	0.0233816
ENSOARG00020015590		0.0203979	0.0237432
ENSOARG00020012231	RTN4IP1	0.017563	0.0238682
ENSOARG00020010384	FANCI	0.0205163	0.023923
ENSOARG00020023401	CCL26	0.0143014	0.0253656
ENSOARG00020017862	PSMB3	0.0366093	0.0253656
ENSOARG00020007572	ROGDI	0.0187476	0.0256917
ENSOARG00020022922	RAMP2	0.0233893	0.0257516
ENSOARG00020002186		0.0167454	0.0268203
ENSOARG00020006229		0.0425529	0.0270228
ENSOARG00020026027	RAD54L2	0.0157033	0.0279554
ENSOARG00020001988		0.0144279	0.0281052
ENSOARG00020018610	MTMR4	0.0190203	0.0281308
ENSOARG00020019894	CFDP1	0.0325032	0.0288297
ENSOARG00020024147		1.85365e-05	0.0301945
ENSOARG00020001360	TXN	0.0216261	0.0301945
ENSOARG00020019322		0.00770703	0.0301975
ENSOARG00020015036	CSNK2B	0.0297249	0.0306216
ENSOARG00020004386		0.00190853	0.0307395
ENSOARG00020019527	CILP2	0.0111782	0.0307733
ENSOARG00020007594	PLEKHO1	0.00355845	0.0311546
ENSOARG00020015317	HSPA2	0.0250521	0.0315558
ENSOARG00020017606		0.027712	0.0316761
ENSOARG00020010538	EMC9	0.0399529	0.0325532
ENSOARG00020003280	FST	0.0408995	0.0337767
ENSOARG00020019957		0.0479198	0.0337767
ENSOARG00020019422	PARS2	0.0334424	0.0341877
ENSOARG00020012159	TXNDC17	0.0149241	0.0344872
ENSOARG00020022897	BCL7C	0.0157033	0.0346368
ENSOARG00020018402	FTH1	0.00193591	0.034857
ENSOARG00020010077	TET3	0.00355845	0.0349134
ENSOARG00020006754	ARL3	0.027712	0.0354062
ENSOARG00020021326		0.0356429	0.035815
ENSOARG00020025319		0.0287688	0.037537
ENSOARG00020013419	FBXO2	0.0394221	0.0383896
ENSOARG00020013914	PTGS1	0.0325515	0.0388663
ENSOARG00020022772	HCST	0.0277387	0.0392684
ENSOARG00020017190	RPL36A	0.00987133	0.0393673
ENSOARG00020015806	FXYD7	0.0367923	0.0397585
ENSOARG00020021075	BATF3	0.046645	0.0398326
ENSOARG00020014679		0.0150251	0.0399989
ENSOARG00020009369	TET1	0.0177807	0.0408525
ENSOARG00020011629		0.0150273	0.0411392
ENSOARG00020022062		0.0410745	0.0412272
ENSOARG00020012459		0.0158604	0.0421267
ENSOARG00020019118	DIAPH2	0.0201362	0.0439775
ENSOARG00020024447	DCTN6	0.0487671	0.0450419
ENSOARG00020001972	FAM78B	0.0153433	0.0457178
ENSOARG00020020875	TRDN	0.00389263	0.045939
ENSOARG00020009403	CCDC34	0.00065406	0.046497
ENSOARG00020006551		0.000986715	0.0473255
ENSOARG00020003408	CMC2	0.00369407	0.0473302
ENSOARG00020023291	RPL22	0.00750889	0.0484062
ENSOARG00020004244	NOVA1	0.00955736	0.0493084
ENSOARG00020020134	FAM81A	0.00117158	0.0152982
ENSOARG00020021700	EDIL3	5.74097e-06	0.000382609
ENSOARG00020004334		0.0179063	0.00890909
ENSOARG00020017646		0.00234175	0.0111066
ENSOARG00020025797	TTPA	0.00057638	0.0214319
ENSOARG00020000940	FAM221A	0.0069436	0.024766
ENSOARG00020002844		0.0198381	0.0301975
ENSOARG00020006183	IL6	0.000819749	0.0318105
ENSOARG00020019164	Metazoa_SRP	2.83567e-08	1.20532e-05
ENSOARG00020010570	FMO2	1.19735e-07	8.94963e-05
ENSOARG00020021493	KCTD19	0.000322603	0.000200706
ENSOARG00020015669	LIX1	7.068e-05	0.00116955
ENSOARG00020018213	LINGO4	0.00103331	0.00434549
ENSOARG00020002275		0.00810673	0.00734088
ENSOARG00020000133		0.00405558	0.00810425
ENSOARG00020006509	LEPR	0.0143014	0.015123
ENSOARG00020018170		0.0100889	0.0195631
ENSOARG00020009446	C2orf88	0.0272389	0.020228
ENSOARG00020023380	SH2D1A	0.00520297	0.0237432
ENSOARG00020008452	ANGPTL8	0.00498741	0.0307045
ENSOARG00020006324	GYS2	0.00309218	0.0340489
ENSOARG00020018502		0.00711461	0.0343803
ENSOARG00020009096	RASGEF1B	0.0223528	0.037537
ENSOARG00020015345	PPP1R36	0.0308852	0.0384299
ENSOARG00020007999		0.0366201	0.0409178
ENSOARG00020010249	GPRIN1	0.0111711	0.0412272
ENSOARG00020017219	DNAH12	0.00065406	0.00732324
ENSOARG00020017670	U3	0.000925857	0.00734088
ENSOARG00020017660	U3	0.000958788	0.00847406
ENSOARG00020004040		0.029293	0.0237432
ENSOARG00020010296	GSDMA	0.0399421	0.0333402
ENSOARG00020017630	U3	0.0083044	0.0397585
ENSOARG00020026073		0.0240713	0.0461074
ENSOARG00020017648	U3	0.000170894	0.000423104
ENSOARG00020007209		0.00103331	0.00149165
ENSOARG00020021055		0.0059722	0.00468524
ENSOARG00020023532	RAB9B	0.00122811	0.00477002
ENSOARG00020024803	SC5	0.0225167	0.037537
ENSOARG00020007898		7.91355e-05	0.0472656
ENSOARG00020004314		0.000227305	0.0141002
ENSOARG00020001036		0.0256628	0.0315558
ENSOARG00020021939		2.94985e-05	6.54499e-05
ENSOARG00020006437	U1	7.91355e-05	0.000168373
ENSOARG00020020702		0.000583642	0.00107319
ENSOARG00020005344	U3	0.00520297	0.00901212
ENSOARG00020025009	U1	0.00654607	0.0111514
ENSOARG00020021688	U1	0.00671774	0.0114561
ENSOARG00020020865	5S_rRNA	0.0074733	0.0127669
ENSOARG00020004114	U1	0.00951209	0.0154275
ENSOARG00020010243		0.0103352	0.0168029
ENSOARG00020005907	U1	0.0117992	0.0188596
ENSOARG00020020710	MDFIC2	0.0144279	0.021989
ENSOARG00020007420	PRSS51	0.0153997	0.0237432
ENSOARG00020020618	U2	0.0167014	0.0256664
ENSOARG00020007012		0	0
ENSOARG00020007610	CPXM1	1.21787e-09	3.10501e-07
ENSOARG00020023857	SCD	1.21787e-09	4.69959e-06
ENSOARG00020014144	CPD	7.86927e-09	1.20532e-05
ENSOARG00020026082		9.83125e-08	2.30983e-05
ENSOARG00020004687	TPBGL	0	2.3312e-05
ENSOARG00020001060	COL5A1	6.29537e-06	3.23774e-05
ENSOARG00020026068		3.8798e-05	4.09869e-05
ENSOARG00020022450		0.000101674	4.28176e-05
ENSOARG00020025919	GRIP2	1.02892e-06	4.66609e-05
ENSOARG00020021658		1.93111e-05	5.11669e-05
ENSOARG00020000531		5.88091e-05	5.74934e-05
ENSOARG00020008285		0.000188478	9.51896e-05
ENSOARG00020019802		3.68803e-07	0.00013072
ENSOARG00020005465		0.000127159	0.000248077
ENSOARG00020003145	NTNG1	6.20279e-08	0.000314372
ENSOARG00020010427	LBP	6.32406e-05	0.000314372
ENSOARG00020021024	IFI6	0.000292427	0.000314372
ENSOARG00020011305	TRPV2	0.000220577	0.000437986
ENSOARG00020025420	IGFBP2	0.000819749	0.000679214
ENSOARG00020006897		4.08805e-08	0.000765779
ENSOARG00020009173	SLC25A36	5.87375e-06	0.0009463
ENSOARG00020026161		0.000252431	0.00107199
ENSOARG00020012625	TUBA4A	0.000889825	0.00117812
ENSOARG00020025090		3.72592e-07	0.00126967
ENSOARG00020014807	NR4A1	0.000803126	0.00134612
ENSOARG00020011520	PAPLN	0.0019294	0.00141407
ENSOARG00020015460	TNNC2	0.00291842	0.00141779
ENSOARG00020023119		1.40002e-05	0.00143634
ENSOARG00020019107	DUSP1	0.000958788	0.00143634
ENSOARG00020024798	TENM4	2.07683e-05	0.00148242
ENSOARG00020020874	FAM169A	0.00116756	0.00151714
ENSOARG00020009900	MYC	0.00190243	0.00151714
ENSOARG00020011244	GREB1	0.00236775	0.00160813
ENSOARG00020000811	PTGFRN	8.98887e-05	0.00194327
ENSOARG00020009383		0.00065406	0.00197182
ENSOARG00020011213	FAP	0.000668377	0.00253664
ENSOARG00020010343		0.00389263	0.00266416
ENSOARG00020012462	LPIN1	0.000537265	0.00275786
ENSOARG00020001231		0.000187449	0.00276557
ENSOARG00020018833	COL6A6	0.00103331	0.00276557
ENSOARG00020011470	CRB2	0.000193349	0.00278058
ENSOARG00020004634	GEM	0.000236677	0.00278058
ENSOARG00020018247	SDC1	0.00057638	0.00298285
ENSOARG00020004495	CCL21	0.00114816	0.00322253
ENSOARG00020025972	AK4	2.06907e-05	0.00322441
ENSOARG00020008739	OLFML2A	3.04717e-06	0.00394899
ENSOARG00020006340	BAZ1A	4.68636e-05	0.00415537
ENSOARG00020010323	SLC43A2	0.00103331	0.00426528
ENSOARG00020015518	EMP3	0.00744745	0.00438382
ENSOARG00020019476		0.00111568	0.00515615
ENSOARG00020005776	APOE	0.00190181	0.00524486
ENSOARG00020015823	JMJD6	0.00414436	0.00524486
ENSOARG00020015544	TIMP1	0.00313213	0.00564284
ENSOARG00020023194	KIAA2012	0.000193089	0.00621554
ENSOARG00020014737	CBR3	0.00165832	0.0064278
ENSOARG00020017542	MYBL2	0.00439144	0.00732324
ENSOARG00020026216	TNFRSF13B	0.00281057	0.00734088
ENSOARG00020019688	FHOD3	0.00289231	0.00734088
ENSOARG00020024091	SPP1	0.00690343	0.00788889
ENSOARG00020021487		0.00228376	0.00810425
ENSOARG00020014302	APRT	0.0023435	0.00810425
ENSOARG00020019799	SELENOM	0.000629362	0.00839018
ENSOARG00020025917	SLC22A3	0.00369038	0.00842087
ENSOARG00020023653	ADGRD1	0.000880305	0.00865443
ENSOARG00020002022		0.000185779	0.00882169
ENSOARG00020006274		0.00310314	0.00892901
ENSOARG00020000543		6.32406e-05	0.00973577
ENSOARG00020025802	DNAH1	0.000826751	0.00980715
ENSOARG00020011427	JUNB	0.00140169	0.00980715
ENSOARG00020009054	TNNI2	0.0179192	0.0109108
ENSOARG00020008069		0.00065406	0.0109373
ENSOARG00020009288	KRT18	0.00671774	0.0111514
ENSOARG00020018985	HSD17B14	0.00526949	0.0114561
ENSOARG00020024549	PRICKLE2	0.00166247	0.0118189
ENSOARG00020020846		0.0260378	0.0120017
ENSOARG00020005882	DCLK1	0.000305363	0.0122034
ENSOARG00020002936	CAPG	0.00368305	0.012361
ENSOARG00020008340	NGRN	0.0242701	0.0126467
ENSOARG00020023319	ELOVL6	0.00244153	0.0132356
ENSOARG00020018640	UBA7	0.0042718	0.0133075
ENSOARG00020017701	RRAD	0.0141729	0.0133355
ENSOARG00020015735	CACNA1G	0.0101057	0.0136343
ENSOARG00020021421	IFI35	0.000954228	0.0139563
ENSOARG00020022300		0.00570322	0.0141002
ENSOARG00020006642	NYNRIN	0.00291842	0.0141352
ENSOARG00020008124	MFSD4A	0.000879164	0.0144256
ENSOARG00020009259	MMP23B	0.00196983	0.0154159
ENSOARG00020022226	PREX1	0.00392851	0.015419
ENSOARG00020000744		0.0205163	0.0154708
ENSOARG00020006877	HIST2H2BE	0.0223528	0.0154843
ENSOARG00020021987	CACNA1D	0.00631227	0.0155578
ENSOARG00020010382	FOXO3	0.00414593	0.0158977
ENSOARG00020024038	TREX1	0.0135231	0.016042
ENSOARG00020009295	SLC25A16	0.00620454	0.0166879
ENSOARG00020022244		0.00410528	0.0167928
ENSOARG00020014129	PMM2	0.0279188	0.0175749
ENSOARG00020007257		0.0027144	0.0179102
ENSOARG00020005414	TNNT1	0.0285627	0.0181424
ENSOARG00020024949	KLHL31	0.000175158	0.0189039
ENSOARG00020020933	ANGPTL1	0.0014318	0.0189039
ENSOARG00020005683	TNC	0.00251999	0.0189039
ENSOARG00020018675	ADAP1	0.0333835	0.0189039
ENSOARG00020001971	CCN1	0.0197537	0.0189854
ENSOARG00020013286	MYH7	0.0201362	0.0190747
ENSOARG00020023672	EVC	0.0223528	0.0194454
ENSOARG00020009368	KRT8	0.00627724	0.0195875
ENSOARG00020015724		0.000589353	0.0207696
ENSOARG00020012075		0.00304196	0.020999
ENSOARG00020018582	RTL1	0.00820571	0.0216974
ENSOARG00020000178	IFT27	0.00245921	0.022427
ENSOARG00020013288	PADI1	0.000231734	0.0231042
ENSOARG00020024830		0.000633977	0.0237432
ENSOARG00020005201	PLCG2	0.0223992	0.0238159
ENSOARG00020022958	ZBTB16	0.00544561	0.0253023
ENSOARG00020008818	AEBP1	0.0259451	0.0253656
ENSOARG00020002167	ZNF462	0.0159254	0.0256664
ENSOARG00020009561	ALDH4A1	0.0290704	0.0256917
ENSOARG00020025035	F13A1	0.0104301	0.0257516
ENSOARG00020013282	ACSF2	0.0272742	0.025884
ENSOARG00020005280	C1QTNF7	0.00989007	0.0270699
ENSOARG00020016110	LGMN	0.045568	0.0277172
ENSOARG00020011081	NGEF	0.00544561	0.0277683
ENSOARG00020022857	VEGFA	0.00585712	0.0277683
ENSOARG00020019599	SLC2A10	0.0234896	0.0279856
ENSOARG00020003825	FMOD	0.0154089	0.0283497
ENSOARG00020003681		0.0124058	0.0286391
ENSOARG00020023792	ADAMTS16	0.00269095	0.0301975
ENSOARG00020005296	ATP11A	0.00706532	0.0307293
ENSOARG00020019762	DHCR24	0.0110581	0.0315558
ENSOARG00020016801	EPHA4	0.0187638	0.0317115
ENSOARG00020015867	ADAMTS2	0.0302938	0.0322696
ENSOARG00020001063	KCNK3	0.0153203	0.0342534
ENSOARG00020003582	P2RX6	0.00244153	0.0343489
ENSOARG00020018437	GALNT10	0.0105566	0.0343621
ENSOARG00020007916	SFXN5	0.00103331	0.0343803
ENSOARG00020003443	ITGA2	0.0256935	0.0344667
ENSOARG00020023367	PTPN4	0.0204755	0.0345116
ENSOARG00020003919	ITGA1	0.0279961	0.034857
ENSOARG00020010066	SPRN	0.0180667	0.0349107
ENSOARG00020001417	ZBTB20	0.0149327	0.0351666
ENSOARG00020001846	ECRG4	0.0256935	0.0357144
ENSOARG00020014334	ISG15	0.016204	0.0359975
ENSOARG00020014834	CORO1A	0.0275096	0.0387619
ENSOARG00020023854	DLC1	0.0101799	0.0390377
ENSOARG00020020599		0.0367511	0.0393673
ENSOARG00020025761	TRANK1	0.0157033	0.0397585
ENSOARG00020010143	PHOSPHO1	0.010085	0.0398445
ENSOARG00020010829	PDE5A	0.0289881	0.0407071
ENSOARG00020015618	RNF213	0.00335792	0.0409178
ENSOARG00020019456	FNDC5	0.018532	0.0415903
ENSOARG00020018136	TCF4	0.0023435	0.0416453
ENSOARG00020026189	DLL1	0.0170449	0.0418707
ENSOARG00020004699	GPT2	0.00930807	0.0422538
ENSOARG00020002603	ADAMTS19	0.00501991	0.0423754
ENSOARG00020014139	EBF2	0.00497361	0.0437556
ENSOARG00020016047		0.00616515	0.0437556
ENSOARG00020015451	SLC15A3	0.0275096	0.0443426
ENSOARG00020017172		0.0265863	0.0443481
ENSOARG00020014431	PPP5C	0.0183167	0.0448955
ENSOARG00020003193	GSS	0.0240912	0.0450077
ENSOARG00020017831		0.0272742	0.0455805
ENSOARG00020020114	MCU	0.00389263	0.0457178
ENSOARG00020006787	RSAD2	0.0112589	0.048054
ENSOARG00020011417	PYGM	0.0198381	0.0484062
ENSOARG00020019062	EXOC3L1	0.0205966	0.0484062
ENSOARG00020000075	ZMAT3	0.00179722	0.0488902
ENSOARG00020003735	BCO1	0.0391019	0.0496243
ENSOARG00020017377		2.83567e-08	1.18723e-06
ENSOARG00020001432	HMCN2	5.02024e-06	2.79996e-06
ENSOARG00020018165	FOS	2.79484e-06	8.92491e-06
ENSOARG00020020253		6.06383e-08	4.28176e-05
ENSOARG00020017657	COL1A2	0.000188478	8.28956e-05
ENSOARG00020012432	COL1A1	1.94994e-06	8.63845e-05
ENSOARG00020007711		1.95516e-05	0.000158612
ENSOARG00020022720	SERPINF2	0.000117051	0.000642136
ENSOARG00020018778	CRYM	1.82013e-08	0.000843178
ENSOARG00020000314	MASP1	9.55125e-07	0.000870148
ENSOARG00020013296	COL3A1	0.00195606	0.000893623
ENSOARG00020004992	POSTN	0.00057638	0.00136925
ENSOARG00020018448	COL4A6	0.00616515	0.00278414
ENSOARG00020018772	CPZ	0.000223339	0.00282482
ENSOARG00020009740	PPM1H	0.00262454	0.00508016
ENSOARG00020015079	PDGFRA	0.000367342	0.00619222
ENSOARG00020016399	DAGLA	0.0029504	0.00882169
ENSOARG00020017100	FRZB	8.07773e-05	0.00973577
ENSOARG00020004898	FKBP10	0.00264767	0.00980715
ENSOARG00020019932	ACTA1	0.0164623	0.0103827
ENSOARG00020013936	CDH11	0.000880305	0.0115087
ENSOARG00020016278		0.00211687	0.0118553
ENSOARG00020007270		0.0110581	0.0118882
ENSOARG00020022688	SERPINF1	0.00143639	0.0132356
ENSOARG00020021119	PLPP3	0.00276126	0.0135011
ENSOARG00020002421	COL6A3	0.000889825	0.0136343
ENSOARG00020018491		0.0027144	0.0140957
ENSOARG00020023130	CNTNAP1	0.0214028	0.0188019
ENSOARG00020000896	CDC20	0.0262982	0.0197163
ENSOARG00020011808	AFF3	0.00973139	0.019779
ENSOARG00020008949	LSS	0.0152541	0.019779
ENSOARG00020006683	PELI3	0.0149309	0.023868
ENSOARG00020019112	CRABP1	0.0174793	0.0276983
ENSOARG00020021271	PIEZO2	0.00721159	0.0306216
ENSOARG00020023437	RASSF4	0.0250521	0.032749
ENSOARG00020005613	IGDCC4	0.00128796	0.0334471
ENSOARG00020007739	MYORG	1.92595e-05	0.0336611
ENSOARG00020024994	SPTLC3	0.000571868	0.034857
ENSOARG00020013542	KIFC1	0.0491777	0.0350831
ENSOARG00020004848	TMEM119	0.00429337	0.0374424
ENSOARG00020004412	ACLY	0.00960668	0.0384299
ENSOARG00020025232		0.0237225	0.0397585
ENSOARG00020026452	NLRC3	0.0498956	0.0458752
ENSOARG00020021234	VCAN	0.0123261	0.0461535
ENSOARG00020008789	MMP2	0.00832614	0.0475634
ENSOARG00020024249	COL21A1	0.000153364	0.00141407
ENSOARG00020016631	PLXDC1	0.00168603	0.0131028
ENSOARG00020013472	ASIC3	0.0492775	0.0321628
ENSOARG00020002961		0.04521	0.0416453
ENSOARG00020007860	TOP2A	0.00057638	0.000981168
ENSOARG00020024795	IL13RA2	0.00190181	0.00377651
ENSOARG00020022577	TBC1D8B	0.00065406	0.00536011
ENSOARG00020000594	AHSG	0.000890838	0.00781372
ENSOARG00020020078	TNFRSF9	0.00369038	0.0111066
ENSOARG00020000751	ZNF699	0.00360193	0.0132356
ENSOARG00020001568	THSD7A	0.00973139	0.0132356
ENSOARG00020010678	SCD5	0.0118326	0.0167274
ENSOARG00020000548	CNTN1	0.00312444	0.020228
ENSOARG00020000652	OTOF	0.00961824	0.021989
ENSOARG00020021468	ACVR1C	0.00520139	0.0237432
ENSOARG00020017661	CCL8	0.0172943	0.0237432
ENSOARG00020023193		0.0203274	0.025449
ENSOARG00020007460		0.0226379	0.0297497
ENSOARG00020015977		0.0141729	0.0333519
ENSOARG00020022135	L2HGDH	6.32406e-05	0.0339791
ENSOARG00020016493	DLGAP5	0.0250521	0.0347962
ENSOARG00020005702	GREM1	0.00227441	0.0377622
ENSOARG00020003773	CKAP2	0.00973139	0.0388663
ENSOARG00020006228	MYBPC1	0.0436888	0.0388663
ENSOARG00020017455	PMP2	0.0325483	0.0430799
ENSOARG00020019241		0.00185762	0.0450116
ENSOARG00020008925	SLC16A12	0.0103981	0.0458752
ENSOARG00020005412		0.000262523	0.0471269
ENSOARG00020023518	VWA2	3.85159e-13	0
ENSOARG00020019113	TMEM229B	0.00166247	0.00141407
ENSOARG00020025078	SAPCD2	0.00211687	0.00753572
ENSOARG00020003805	DIAPH3	0.00410613	0.00847406
ENSOARG00020010662		0.018483	0.0161522
ENSOARG00020019837	SOST	0.0107731	0.0168662
ENSOARG00020005722	SCG5	0.0149065	0.0277683
ENSOARG00020013237	SLC6A12	0.0109429	0.031146
ENSOARG00020024287	NCAPG	0.0318318	0.0347962
ENSOARG00020005413	SLC27A2	0.045052	0.0356352
ENSOARG00020017598	KY	0.027712	0.0421727
ENSOARG00020020126	SMPDL3B	0.0201362	0.0461304
ENSOARG00020011227	PIMREG	0.045052	0.0475634
ENSOARG00020017417	SEL1L3	4.37733e-06	0.000242269
ENSOARG00020018436	DLK1	0.00513356	0.0251538
ENSOARG00020012328		0.00129873	0.00394899
ENSOARG00020017476	TECTB	0.00017485	0.00448123
ENSOARG00020003463	ERICH2	0.0067136	0.0295847
ENSOARG00020003858		0.00300328	0.0345116
ENSOARG00020022402		0.0145487	0.0411392
ENSOARG00020024320	ALOX15	0.00116756	0.0189854
ENSOARG00020021112	FAM71A	1.33394e-07	6.21435e-05
ENSOARG00020023426	BHLHA15	0.0129758	0.017257
ENSOARG00020023173	Metazoa_SRP	0.00966464	0.0176302
ENSOARG00020011504	SPOCK1	0.012707	0.0237432
ENSOARG00020017697	U3	0.0143014	0.0306485
ENSOARG00020018538	MYH2	0.0165457	0.0167571
ENSOARG00020014164	SERPINB11	0.0251987	0.0200995
ENSOARG00020011191		0.00830166	0.0140263
ENSOARG00020007428	KRT222	0.0277387	0.0306216
ENSOARG00020000061	SLFNL1	0.00961824	0.0384299
ENSOARG00020011536	KRT5	0	0
ENSOARG00020008876	HMGB4	0.00114816	0.00208971
ENSOARG00020001744	UPK1B	0.00568728	0.00979707
ENSOARG00020016682	KCNT2	0.0110624	0.0178786
ENSOARG00020010595	HEPHL1	0.0150251	0.0231172
ENSOARG00020016437	LRTM2	0.0180667	0.0276983
ENSOARG00020012949	PGLYRP1	0.0282791	0.0416231
ENSOARG00020025074	LTF	1.04731e-09	4.69959e-06
ENSOARG00020006739		1.82277e-07	1.12803e-05
ENSOARG00020021046	ASGR2	4.41471e-05	2.3312e-05
ENSOARG00020023963	PYCARD	5.98794e-05	3.23774e-05
ENSOARG00020002402	VGLL3	8.99848e-07	6.41469e-05
ENSOARG00020014594		8.99848e-07	6.41469e-05
ENSOARG00020025841		3.31718e-05	0.000154845
ENSOARG00020018836	ADAMTS12	1.03437e-06	0.000164728
ENSOARG00020004920	KCNK12	8.22635e-06	0.000253626
ENSOARG00020005225		6.13586e-06	0.000290085
ENSOARG00020013098	LRATD1	1.75362e-05	0.000314372
ENSOARG00020005791	SREK1IP1	1.62942e-07	0.000324844
ENSOARG00020023398	MCCC2	2.79484e-06	0.000324844
ENSOARG00020021210		8.85324e-06	0.00035046
ENSOARG00020010142	RHOD	0.000234943	0.00035046
ENSOARG00020002652	MGP	0.000879164	0.000368227
ENSOARG00020016816		2.84904e-06	0.000374167
ENSOARG00020004493	MZT2B	0.000274877	0.000423104
ENSOARG00020003723	TMEM104	0.000575446	0.000604743
ENSOARG00020017332	GASK1B	2.99142e-07	0.00062827
ENSOARG00020023464	DEPP1	1.30124e-05	0.000642136
ENSOARG00020026228	PLAC9	3.1407e-05	0.000736792
ENSOARG00020026233	RASD1	2.89067e-05	0.000765779
ENSOARG00020008990	APOD	1.45891e-05	0.000979973
ENSOARG00020010134	CCND2	0.000252451	0.00107199
ENSOARG00020011530	IVD	0.000234186	0.00107381
ENSOARG00020021717	GADD45B	0.000270458	0.00117812
ENSOARG00020006843	TPT1	0.000958788	0.00117812
ENSOARG00020023268	MAP1B	3.31718e-05	0.00134966
ENSOARG00020013103	ABCB8	0.00248687	0.00143634
ENSOARG00020006230	UGT1A1	5.16396e-05	0.00144743
ENSOARG00020026113	CRABP2	0.00242055	0.00156353
ENSOARG00020008643		0.000108822	0.00160813
ENSOARG00020010899	CPN2	6.32406e-05	0.00164471
ENSOARG00020026397	MFAP4	0.000316583	0.0016461
ENSOARG00020019596		0.00350459	0.00203777
ENSOARG00020017590	PDPR	0.00103331	0.00212715
ENSOARG00020000874	S100A2	0.000490177	0.00217989
ENSOARG00020005819		0.000315396	0.00251186
ENSOARG00020021074	DIP2B	6.32406e-05	0.00265771
ENSOARG00020000855	S100A4	0.00217769	0.00276557
ENSOARG00020010135	RBP1	0.00306509	0.00282306
ENSOARG00020015696	RBMS1	4.3377e-05	0.00298285
ENSOARG00020015678		0.000420649	0.00298285
ENSOARG00020013117	HIF3A	0.000175158	0.00300668
ENSOARG00020001083		0.000486542	0.00313747
ENSOARG00020009635		0.00263019	0.00320199
ENSOARG00020019997	RBM3	0.00122811	0.00367981
ENSOARG00020016343	SLC35E4	0.0037717	0.00393851
ENSOARG00020012311	ACAD8	0.00111568	0.00403758
ENSOARG00020005712	PCYOX1	0.000561874	0.00407153
ENSOARG00020011138	ADA	0.000819749	0.00410421
ENSOARG00020011584	PDK2	0.00441839	0.00422024
ENSOARG00020001706	RXRA	0.0118173	0.00424468
ENSOARG00020018452		0.000959815	0.00428459
ENSOARG00020012603	HSPA1A	0.000490177	0.00443762
ENSOARG00020019445	LARP1	0.00319544	0.00443762
ENSOARG00020014126	PDHA1	1.37625e-05	0.00477002
ENSOARG00020014319	ACSS2	0.00172969	0.00481689
ENSOARG00020020243	ADRB3	0.00498741	0.00503123
ENSOARG00020013019	ATP9A	0.00495068	0.00508016
ENSOARG00020008805	SLC35E2B	0.00108055	0.00524137
ENSOARG00020012463		0.00179722	0.00528671
ENSOARG00020019385	LVRN	0.00199105	0.00532577
ENSOARG00020005664	TPM2	0.00131572	0.00551194
ENSOARG00020024043	TRMT9B	0.00234946	0.00571649
ENSOARG00020005443	PYM1	0.00103834	0.00593811
ENSOARG00020010025		0.00386654	0.00608152
ENSOARG00020017748	U3	3.33319e-05	0.00631471
ENSOARG00020011626	CBX6	0.00211687	0.00631471
ENSOARG00020022058		0.00369038	0.00631471
ENSOARG00020007976	PLCD4	0.00790628	0.00631471
ENSOARG00020010414	HECTD2	0.00831605	0.00631471
ENSOARG00020010960	BST-2A	0.00437661	0.00661125
ENSOARG00020011777	COX7A1	0.00816414	0.00676093
ENSOARG00020001839	SEC62	8.76743e-05	0.00732324
ENSOARG00020012742	TCOF1	0.00441839	0.00732324
ENSOARG00020019275	PTPN11	0.00498741	0.00732324
ENSOARG00020011576	QPCTL	0.00418845	0.00788889
ENSOARG00020022593	PDGFRL	0.0121559	0.00810425
ENSOARG00020002446	CREB3L2	0.000609043	0.00812298
ENSOARG00020006912	AHCYL2	6.32406e-05	0.00865443
ENSOARG00020022145	CST6	0.00613053	0.00865443
ENSOARG00020008115	HNRNPH3	0.00371821	0.00887864
ENSOARG00020003844	CKS2	0.0129005	0.00973577
ENSOARG00020020214	MRPL41	0.0074733	0.00979035
ENSOARG00020017182		0.00139084	0.0102246
ENSOARG00020025871	MRPS25	0.00353208	0.0103827
ENSOARG00020004128	DBNDD1	0.00559142	0.0105335
ENSOARG00020016287		1.1133e-05	0.0107689
ENSOARG00020005374	APMAP	0.0069885	0.0109373
ENSOARG00020013434		0.0019967	0.0113129
ENSOARG00020013487		0.0123514	0.0116772
ENSOARG00020000765	S100A12	0.0165555	0.0118189
ENSOARG00020018995	SLC16A7	0.00513356	0.0120017
ENSOARG00020006876	ANTXR1	0.00361063	0.012057
ENSOARG00020000776	S100A8	5.54649e-05	0.012082
ENSOARG00020000159	INHBA	0.00116756	0.012361
ENSOARG00020024390	MTDH	0.000175158	0.0130887
ENSOARG00020006322	PRXL2B	0.00242055	0.0132356
ENSOARG00020003171	TCF15	0.00671774	0.0132356
ENSOARG00020008123		0.00618296	0.0135011
ENSOARG00020018858	BCAT2	0.0179111	0.0136256
ENSOARG00020009587	GNB4	0.00607081	0.0136343
ENSOARG00020012847	CERS4	0.0115896	0.0137529
ENSOARG00020006821	DACH1	0.00982956	0.0144452
ENSOARG00020009463	ECHS1	0.027712	0.0144452
ENSOARG00020019738	RAP2A	0.0069235	0.0145689
ENSOARG00020012335		0.00128796	0.0152982
ENSOARG00020005605	FGFBP1	0.00384944	0.0153348
ENSOARG00020022725		0.0069235	0.0154708
ENSOARG00020009055	FYB1	0.000889825	0.0154945
ENSOARG00020006262	RPL17	0.0069235	0.0154945
ENSOARG00020009415	ACKR1	0.000826751	0.0158744
ENSOARG00020017587	SFRP2	0.00291842	0.0158744
ENSOARG00020025757	EPM2AIP1	7.22223e-05	0.0162032
ENSOARG00020017088		0.00271351	0.0162434
ENSOARG00020010720	PTPRD	0.0037717	0.0162434
ENSOARG00020004502	PHOSPHO2	0.0153997	0.0162434
ENSOARG00020023949	ADAM12	0.0017738	0.0165734
ENSOARG00020024476	ACO2	0.0323598	0.0165734
ENSOARG00020014341		0.0224201	0.0166879
ENSOARG00020019864	CCDC197	0.0186847	0.0167571
ENSOARG00020004356	REM1	0.0205163	0.0167928
ENSOARG00020022886	PRKAR2A	0.00341848	0.0168029
ENSOARG00020022148	PLEKHA2	0.00761962	0.0168662
ENSOARG00020003503	HEBP1	0.0168312	0.0168662
ENSOARG00020009034		0.0189452	0.0168679
ENSOARG00020014173	PLIN4	0.0183314	0.0170541
ENSOARG00020016876	FEZ1	0.0157033	0.0179888
ENSOARG00020025943	SLC6A6	0.00902074	0.0180202
ENSOARG00020002135		0.00690343	0.0181424
ENSOARG00020024683	GMFG	0.00973139	0.0181424
ENSOARG00020003056	MYO9A	0.0168755	0.0188246
ENSOARG00020019411		0.0050062	0.0188596
ENSOARG00020017569	FABP9	0.0171676	0.0188596
ENSOARG00020011799	PEPD	0.0083044	0.018968
ENSOARG00020020102	DAG1	0.017338	0.0189854
ENSOARG00020023953		0.000845528	0.0193379
ENSOARG00020022355	TUB	0.00281057	0.0194726
ENSOARG00020001952	ADPRH	0.00498741	0.0194726
ENSOARG00020011884	GLB1L	0.0250602	0.0194726
ENSOARG00020014026		0.0204755	0.0195631
ENSOARG00020020557		0.0214715	0.0195631
ENSOARG00020023684	MT3	0.0201614	0.019622
ENSOARG00020016724	MYBPC2	0.000482179	0.0196788
ENSOARG00020017979	RPL17	0.00346058	0.019779
ENSOARG00020012975	CPEB3	0.0163515	0.019779
ENSOARG00020012887	GPIHBP1	0.00951209	0.0198864
ENSOARG00020000673	QPCT	0.00982956	0.0202669
ENSOARG00020011715	CLN6	0.0308557	0.0202669
ENSOARG00020023081	TMEM130	0.00166247	0.0203747
ENSOARG00020023719	NFIA	0.00160418	0.0209973
ENSOARG00020018333		0.00497361	0.0211395
ENSOARG00020025122	LPP	0.0186847	0.0211395
ENSOARG00020018357	H6PD	0.0353542	0.0214666
ENSOARG00020013988	ZNF821	0.035391	0.0217616
ENSOARG00020005801	UPF2	0.000958788	0.0219764
ENSOARG00020000194		0.0101057	0.022684
ENSOARG00020001726	MOGS	0.0136436	0.023047
ENSOARG00020002975		0.0164326	0.0231172
ENSOARG00020010861		0.00425536	0.0233816
ENSOARG00020011316	POLR2L	0.00624678	0.0233816
ENSOARG00020020475	ATP6AP1	0.030575	0.0234455
ENSOARG00020018495	RHOB	0.0190834	0.0237182
ENSOARG00020022040	CFP	0.0156557	0.0237432
ENSOARG00020019510		0.00421908	0.023923
ENSOARG00020013829	METTL17	0.0214478	0.0245053
ENSOARG00020013039	PTRH2	0.00374719	0.024576
ENSOARG00020024961		0.00559773	0.0256698
ENSOARG00020020763	HOMER2	0.0257657	0.0256917
ENSOARG00020016727	TSPAN5	0.0437936	0.0256917
ENSOARG00020010784	TMEM178A	0.00987133	0.0257074
ENSOARG00020017506		0.00637946	0.0260068
ENSOARG00020003235		0.00166247	0.0262942
ENSOARG00020022502	ADAM19	0.00628895	0.0264043
ENSOARG00020023522	MAPK13	0.00596781	0.0266777
ENSOARG00020015379	IL34	0.0117751	0.0266777
ENSOARG00020010096	TTC19	0.00122811	0.0268203
ENSOARG00020018609	DLAT	0.000265885	0.0270224
ENSOARG00020018631	PLXNA1	0.011705	0.0270228
ENSOARG00020003468	CSRP2	0.0307076	0.0274876
ENSOARG00020024778	CA4	0.0325515	0.0274876
ENSOARG00020024678	LIMCH1	0.00299527	0.0275203
ENSOARG00020006266	ZBTB34	0.0143014	0.0275203
ENSOARG00020002892		0.00421908	0.0275492
ENSOARG00020008698	PM20D1	0.0136436	0.0276983
ENSOARG00020002004	PTGES	0.00501991	0.0277683
ENSOARG00020023463	TRPV4	0.00320297	0.0280486
ENSOARG00020014533		0.00961824	0.0282539
ENSOARG00020009294		0.00320297	0.0283497
ENSOARG00020015741	SFRP4	0.0158604	0.0283497
ENSOARG00020015807		0.0303626	0.0290135
ENSOARG00020001166	AKR1B1	0.00995526	0.0290492
ENSOARG00020008606		0.0259451	0.0295847
ENSOARG00020025428	CLEC3B	0.0170829	0.0297497
ENSOARG00020000198	TAC1	0.00112619	0.0311546
ENSOARG00020008243	FOSB	0.000175158	0.031303
ENSOARG00020001668	GPR107	0.019955	0.0314993
ENSOARG00020013259	IDE	0.0306891	0.0315558
ENSOARG00020021564	LIPC	0.0154513	0.0317366
ENSOARG00020020641	BTD	0.0021392	0.0318921
ENSOARG00020025978	PPT1	0.0334424	0.031902
ENSOARG00020013806		0.0157033	0.0321628
ENSOARG00020020851	GOLGA7B	0.0429028	0.0322228
ENSOARG00020019823	LONRF3	0.0129857	0.0323576
ENSOARG00020021643	EFR3B	0.0027872	0.0326911
ENSOARG00020024024	EDNRA	0.04494	0.0334006
ENSOARG00020025055	FARS2	0.0182713	0.0338527
ENSOARG00020017467	TNRC6C	0.00160349	0.0339136
ENSOARG00020013831	HYAL2	0.0440671	0.0343803
ENSOARG00020025636	SUSD2	0.0157033	0.0345116
ENSOARG00020007452	ACP5	0.0100194	0.0346368
ENSOARG00020026408	TNFRSF12A	0.0119525	0.0346368
ENSOARG00020008341	GSTM3	0.0145487	0.0347962
ENSOARG00020004095	USH1C	0.015132	0.0347962
ENSOARG00020025234	THRSP	0.0151973	0.034857
ENSOARG00020002769		0.0162308	0.0350831
ENSOARG00020017773	ASB14	0.00166376	0.0354062
ENSOARG00020005314		0.00513232	0.0354062
ENSOARG00020024796	APOA1	0.0259394	0.0355091
ENSOARG00020016067		0.00690343	0.0359704
ENSOARG00020025020	IL17RE	0.0179063	0.0370848
ENSOARG00020019354	CHST3	0.027712	0.0370967
ENSOARG00020018342	SRPX2	0.0178359	0.0372127
ENSOARG00020020635	ALAD	0.020344	0.0375646
ENSOARG00020014623	GDE1	0.0279961	0.0376563
ENSOARG00020015556		0.0231774	0.0379934
ENSOARG00020012267	NME9	1.62942e-07	0.0389203
ENSOARG00020009339	INPP1	0.00314678	0.0392684
ENSOARG00020020121	DPEP1	0.0105478	0.0393673
ENSOARG00020014227	SPNS3	0.026675	0.039662
ENSOARG00020006030	TRAPPC10	0.0210328	0.0397585
ENSOARG00020010334	TTC36	0.049008	0.0400459
ENSOARG00020008588	CCDC88B	0.0273547	0.0401792
ENSOARG00020002823	CS	0.00834403	0.0415553
ENSOARG00020002483	DIPK1B	0.0251987	0.0415903
ENSOARG00020003217	OGDH	0.0252753	0.0415903
ENSOARG00020023387	LETM1	0.0315941	0.0415903
ENSOARG00020001284	CYP4B1	0.00781936	0.0418864
ENSOARG00020025388	PAK1	0.0410563	0.0421267
ENSOARG00020008733	THBS1	0.0427244	0.0421267
ENSOARG00020006102	EXTL3	0.0410745	0.0437556
ENSOARG00020017943	TMEM91	0.00389263	0.043936
ENSOARG00020013409	S100B	0.0409757	0.0441797
ENSOARG00020023059	ANAPC2	0.0408285	0.0443426
ENSOARG00020004940	P3H4	0.0346867	0.0446674
ENSOARG00020007824	C1orf54	0.0383312	0.0450419
ENSOARG00020013289		0.0187897	0.0451623
ENSOARG00020026313	PDPK1	0.0362979	0.0451623
ENSOARG00020015774	RAB15	0.0335855	0.0455403
ENSOARG00020000264	PTGDS	0.000105507	0.045939
ENSOARG00020007903		0.0409655	0.046716
ENSOARG00020001262	ABCD2	0.0198381	0.0470152
ENSOARG00020000530	SDHC	0.0406145	0.0472656
ENSOARG00020001440		0.00822952	0.0473805
ENSOARG00020008550		0.0183314	0.0476749
ENSOARG00020016820	COA8	0.0366201	0.047689
ENSOARG00020000376	ST6GAL1	0.0383833	0.047689
ENSOARG00020012453	BCL9L	0.0369661	0.0476964
ENSOARG00020016925		0.0170993	0.0482792
ENSOARG00020013456	RNF130	0.0411894	0.0500178
ENSOARG00020025083	PPP1R3G	0.0253671	0.050319
ENSOARG00020021990	DIPK2B	0.0459929	0.050319
ENSOARG00020014496	NLRX1	0.0489322	0.050319
ENSOARG00020002845		0.0151059	0.0503414
ENSOARG00020019416	TANC1	0.0154028	0.0503566
ENSOARG00020012857		0.0187897	0.0503566
ENSOARG00020026319		0.0333812	0.0503566
ENSOARG00020023915	TNFAIP3	0.0408995	0.0503566
ENSOARG00020016886	RNF187	0.0491718	0.050436
ENSOARG00020017517	KMT2C	0.0196873	0.050469
ENSOARG00020001563	NOTCH2	0.0127241	0.0506709
ENSOARG00020002394	BAZ2A	0.00309218	0.0508409
ENSOARG00020014015	ALDH6A1	0.00869019	0.0508409
ENSOARG00020025773	GLDN	0.0231186	0.0508409
ENSOARG00020008563	MMP15	0.0240355	0.0508409
ENSOARG00020015592	ZNF219	0.0494223	0.0508409
ENSOARG00020006784		0.0273522	0.0509002
ENSOARG00020007443	CA3	0.0174793	0.0509347
ENSOARG00020004039	SLC39A9	0.0183314	0.0509347
ENSOARG00020017822		0.04494	0.0509347
ENSOARG00020011859	SOX4	0.0127617	0.0512747
ENSOARG00020023183	ITGBL1	0.0274621	0.0512747
ENSOARG00020022730		0.0376268	0.0512747
ENSOARG00020016575		0.00042312	0.0516787
ENSOARG00020010726	ACP2	0.000619734	0.0516787
ENSOARG00020010490	GNA13	0.000879164	0.0516787
ENSOARG00020006479	PHF20L1	0.00116894	0.0516787
ENSOARG00020007651	LDLR	0.00276126	0.0516787
ENSOARG00020002902	RPS8	0.00743997	0.0516787
ENSOARG00020016902	ST8SIA4	0.00881708	0.0516787
ENSOARG00020001913	IL6R	0.0146954	0.0516787
ENSOARG00020015833		0.0180667	0.0516787
ENSOARG00020011622	LIPG	0.027712	0.0516787
ENSOARG00020002812	CNPY2	0.036817	0.0516787
ENSOARG00020004056		0.0410745	0.0516787
ENSOARG00020021935	UXT	0.0494414	0.0520292
ENSOARG00020001109		0.0121971	0.0521467
ENSOARG00020004853	PIK3C2B	0.0191077	0.0521467
ENSOARG00020005834	LRP8	0.0459929	0.0522024
ENSOARG00020017328	DYRK1A	0.00118416	0.05236
ENSOARG00020016179	GAL	0.00166247	0.05236
ENSOARG00020020146	GPC3	0.00196983	0.05236
ENSOARG00020023431	P3H3	0.0171453	0.05236
ENSOARG00020001590		0.0223528	0.05236
ENSOARG00020010772	FZD2	0.021437	0.0529753
ENSOARG00020006363	MAB21L1	0.0259451	0.053055
ENSOARG00020001134	PSME4	0.0410563	0.0531222
ENSOARG00020026099		0.0406006	0.053244
ENSOARG00020021544	FOSL1	0.00712775	0.0536007
ENSOARG00020020483	YAP1	0.00166247	0.0537987
ENSOARG00020006194		0.0482828	0.0538989
ENSOARG00020004073		0.0202781	0.0549099
ENSOARG00020017125		0.046645	0.0549273
ENSOARG00020001028	NRIP1	0.0248068	0.0553821
ENSOARG00020005866		0.0263618	0.0553821
ENSOARG00020002706	MX1	0.0367923	0.0554646
ENSOARG00020014390	SERTAD1	0.0101057	0.0555245
ENSOARG00020009413	XAB2	0.0060313	0.0562306
ENSOARG00020020443	HSPA8	0.00966464	0.0562306
ENSOARG00020018249	RORC	0.0151973	0.0562306
ENSOARG00020009608	KERA	0.0176393	0.0562306
ENSOARG00020014213		0.0391115	0.0565193
ENSOARG00020000292	U3	0.00802243	0.0566441
ENSOARG00020016262	U1	0.03931	0.0567254
ENSOARG00020001363	DDR2	0.0250795	0.0573936
ENSOARG00020001251	EPHB6	0.00389263	0.0575114
ENSOARG00020024599	ATRNL1	0.026675	0.0575114
ENSOARG00020017533	PSMD13	0.0318318	0.0575114
ENSOARG00020016155	SIK2	0.0353366	0.0575114
ENSOARG00020024160	RBM47	0.0365709	0.0575114
ENSOARG00020008299	MICAL1	0.019955	0.0577547
ENSOARG00020007955	TRIM63	0.00385665	0.0577587
ENSOARG00020013424		0.00951209	0.0577587
ENSOARG00020009117	LDLRAP1	0.00735848	0.0578675
ENSOARG00020011168	PITPNC1	0.0357145	0.057886
ENSOARG00020015692		0.0374642	0.057886
ENSOARG00020001209	GPC1	0.018738	0.0579513
ENSOARG00020006936	CD52	0.0498864	0.0579513
ENSOARG00020020764	IER3	0.00907201	0.0580288
ENSOARG00020001631	HES6	0.0282009	0.0582156
ENSOARG00020026266	TMEM204	0.0367923	0.0582156
ENSOARG00020014624		0.0414341	0.0582156
ENSOARG00020017397	GORASP1	0.0443118	0.0582156
ENSOARG00020004270	SFMBT2	0.0120922	0.0582452
ENSOARG00020004582	CXCL10	0.0384164	0.0582452
ENSOARG00020016908	PLA2R1	0.0236125	0.0584463
ENSOARG00020012811	MRPL30	0.0285627	0.0585249
ENSOARG00020015358	ZFHX4	0.000234186	0.058565
ENSOARG00020014621	MRPS18C	0.0422549	0.0586921
ENSOARG00020020716	BAG2	0.0316259	0.0587047
ENSOARG00020017201		0.0280494	0.0587635
ENSOARG00020017905	CTRC	0.0374642	0.0587635
ENSOARG00020002093	DBT	0.000673148	0.0589454
ENSOARG00020018770	SLCO2A1	0.00116756	0.0589881
ENSOARG00020020018	ANKRD50	0.035391	0.0589881
ENSOARG00020014995	ANKRD37	0.0118971	0.0593432
ENSOARG00020017573	CCL2	0.0024406	0.0594196
ENSOARG00020020122	PEG10	0.0143014	0.0594196
ENSOARG00020007906	SOGA1	0.0069436	0.0594289
ENSOARG00020001308	PNPLA3	0.0270398	0.0594289
ENSOARG00020025880	SERPINB5	0.0317477	0.0594289
ENSOARG00020023840		0.0311425	0.0594591
ENSOARG00020025968	C17orf80	0.0316259	0.0594591
ENSOARG00020023177	ENPEP	0.000120478	0.0594916
ENSOARG00020013455	NOP53	0.0251987	0.0595949
ENSOARG00020019744	ALKBH7	0.0357744	0.0595949
ENSOARG00020004539	SREK1	0.00526231	0.0596322
ENSOARG00020021193	RPLP0	0.0367923	0.0598125
ENSOARG00020011040	NUDT14	0.00656752	0.060008
ENSOARG00020003795	CHI3L1	0.0376268	0.0600414
ENSOARG00020000681		0.00355845	0.0600867
ENSOARG00020002805	DMAP1	0.0191077	0.0600867
ENSOARG00020000037		0.0422549	0.0600867
ENSOARG00020012074		0.0426191	0.0600867
ENSOARG00020017805	TP53I13	0.0479927	0.0600867
ENSOARG00020006013	IPO11	0.0277387	0.0601146
ENSOARG00020005530	GALNT14	0.0344591	0.0601146
ENSOARG00020012456		0.0290704	0.0603407
ENSOARG00020015902	GAMT	0.00689196	0.0605816
ENSOARG00020016382	FBLIM1	0.0173356	0.0605816
ENSOARG00020000805	DNAJC22	0.0386243	0.0606539
ENSOARG00020025691	STAB1	0.0148524	0.0607144
ENSOARG00020015022	NOC2L	0.04494	0.0607144
ENSOARG00020003517	SLITRK5	0.0329661	0.0607263
ENSOARG00020024309	MRPL14	0.0402676	0.0607263
ENSOARG00020014611	GAA	0.0352147	0.0608612
ENSOARG00020017291		0.0148919	0.0609061
ENSOARG00020004500	SLCO2B1	0.0211533	0.0612126
ENSOARG00020000347		0.0396923	0.0613689
ENSOARG00020013245	TRIL	0.00213596	0.0614008
ENSOARG00020023897	GAPDH	0.0277569	0.0614008
ENSOARG00020005710	CPA3	0.0362979	0.0614767
ENSOARG00020025606	MIF	0.0426153	0.0614767
ENSOARG00020016471	KIF21B	0.0214028	0.0614825
ENSOARG00020021017	PNPO	0.00119903	0.0620553
ENSOARG00020014185	LIG1	0.0369119	0.0620553
ENSOARG00020011636	COL11A2	0.00896494	0.0621011
ENSOARG00020001670		0.0314841	0.0621011
ENSOARG00020012050	TIMP2	0.0330556	0.0621011
ENSOARG00020013258		0.0420979	0.0621011
ENSOARG00020019633		0.0211119	0.0621891
ENSOARG00020002303		0.045052	0.0621891
ENSOARG00020024813	VMO1	0.0205247	0.0622878
ENSOARG00020026194	NME2	0.0372388	0.0622878
ENSOARG00020014276	KIF20A	0.0427498	0.0622878
ENSOARG00020001199		0.0438977	0.0622878
ENSOARG00020000440	BTLA	0.0451493	0.0622878
ENSOARG00020014078		0.0451989	0.0622878
ENSOARG00020000887	FNDC3B	0.0127241	0.0622996
ENSOARG00020009345		0.0454036	0.0622996
ENSOARG00020004679	IFT88	0.0219568	0.0623067
ENSOARG00020011975	TRPA1	0.045568	0.0623594
ENSOARG00020024858	MYL3	0.033342	0.062415
ENSOARG00020017338	LBR	0.000890838	0.0626322
ENSOARG00020005892	EPB41L1	0.00976846	0.0626322
ENSOARG00020010301	MED30	0.0124487	0.0626322
ENSOARG00020000932	TMEM18	0.022996	0.0626322
ENSOARG00020011961		0.0491428	0.0630513
ENSOARG00020026360	SMCR8	0.00150047	0.063131
ENSOARG00020008598	MIOX	0.0353294	0.0633313
ENSOARG00020020396		0.0395398	0.0639145
ENSOARG00020012181		0.00383692	0.0639269
ENSOARG00020005689		0.027771	0.0639483
ENSOARG00020000693		0.0440926	0.0639483
ENSOARG00020009407	TBC1D4	0.0272703	0.0639555
ENSOARG00020003307	RPS12	0.0218631	0.0641161
ENSOARG00020007874	SPC24	0.0223528	0.0644765
ENSOARG00020011564	MGA	0.0100889	0.0645692
ENSOARG00020020444	GUCY1A1	0.00389263	0.0648547
ENSOARG00020003011	VAMP5	0.0386243	0.0648547
ENSOARG00020016885		0.0316011	0.0648885
ENSOARG00020021320		0.00432482	0.0651116
ENSOARG00020024318	CWF19L2	0.0130201	0.0651116
ENSOARG00020007160	H1-2	0.0288842	0.0651116
ENSOARG00020011843	APAF1	0.0292058	0.0651116
ENSOARG00020001221	SLC2A13	0.0350057	0.0651116
ENSOARG00020006224		0.0448182	0.0651116
ENSOARG00020004797		0.00993427	0.0655142
ENSOARG00020022399	CHCHD1	0.008437	0.0657834
ENSOARG00020014967	DTX4	0.0164714	0.0657834
ENSOARG00020000948		0.0170619	0.0657834
ENSOARG00020017126		0.0204392	0.0657834
ENSOARG00020001475	PODNL1	0.0353542	0.0657834
ENSOARG00020010596		0.0352147	0.0658038
ENSOARG00020002136	ADAR	0.0362386	0.0659256
ENSOARG00020017815	CD302	0.00533353	0.06597
ENSOARG00020025015	ThymB4X	0.0149551	0.06597
ENSOARG00020012041	SAT2	0.0383312	0.06597
ENSOARG00020019027	MND1	0.00960668	0.0662048
ENSOARG00020008825	HECW2	0.0369661	0.0663426
ENSOARG00020025464		0.0141134	0.0664332
ENSOARG00020015526	PCDHB15	0.00451011	0.0664743
ENSOARG00020019487	GAS7	0.0060313	0.0664743
ENSOARG00020026042	SLC16A3	0.00930807	0.0665181
ENSOARG00020019399	FAT1	0.00929082	0.0672954
ENSOARG00020015988	AIF1	0.0205966	0.0675324
ENSOARG00020013933	PPP1R3F	0.0132324	0.0675954
ENSOARG00020012387	CCNG1	0.0394198	0.0675954
ENSOARG00020025291	RPS4X	0.0353493	0.0676752
ENSOARG00020001206		0.00544561	0.0680898
ENSOARG00020023651		0.0193418	0.0681424
ENSOARG00020006931	RGS1	0.0361206	0.0681424
ENSOARG00020016954	LDLRAD3	0.0108541	0.0681993
ENSOARG00020023051	SLC24A3	0.0325515	0.0682811
ENSOARG00020002367	NDUFB4	0.0290704	0.068537
ENSOARG00020015962	ALDOA	0.0331146	0.0687684
ENSOARG00020014436	SETD4	0.0260378	0.0688646
ENSOARG00020003197	CYP4F22	0.0050275	0.0692112
ENSOARG00020013290	PIGT	0.0274487	0.0692112
ENSOARG00020024787	BAHCC1	0.0367511	0.0692112
ENSOARG00020008826	SELE	0.0231762	0.0692577
ENSOARG00020009703	IRF8	0.0300256	0.0694514
ENSOARG00020017577	LGI1	0.0285627	0.0697521
ENSOARG00020020967	CERT1	0.0292058	0.0697526
ENSOARG00020013331		0.0352147	0.0698531
ENSOARG00020014469	MAGOH	0.0356429	0.0698807
ENSOARG00020026214	ZMIZ1	0.0386243	0.0699337
ENSOARG00020020523	TTC12	0.0239253	0.0699393
ENSOARG00020017122	GPAM	0.0487671	0.0700744
ENSOARG00020012618	TIMM22	0.00138288	0.0702098
ENSOARG00020000993	FAM120A	0.00116756	0.0707515
ENSOARG00020007831		0.0164085	0.0710927
ENSOARG00020003558	BOD1L1	0.00089403	0.0712755
ENSOARG00020026066	DOCK3	0.0466204	0.0715805
ENSOARG00020013837	SETD7	0.042824	0.0720487
ENSOARG00020021652	RPS9	0.0141118	0.0721621
ENSOARG00020019734	FAT4	0.0158604	0.0721621
ENSOARG00020002407	TMEM19	0.0228788	0.0721621
ENSOARG00020015697	SSH2	0.00377922	0.0726057
ENSOARG00020002718	DYNC1I2	0.0493799	0.0726057
ENSOARG00020024558	RNF125	0.0267983	0.0726257
ENSOARG00020005730	NOSTRIN	0.0498321	0.0730347
ENSOARG00020000901	OLFM1	0.0204392	0.0732193
ENSOARG00020014986		0.0438977	0.0733696
ENSOARG00020014449		0.045568	0.0734705
ENSOARG00020009024	GJB5	0.0277387	0.0735828
ENSOARG00020011568		0.0275096	0.0744672
ENSOARG00020000678		0.0298895	0.0744672
ENSOARG00020025892	ROR1	0.0282521	0.0747591
ENSOARG00020009915	SOCS3	0.0496061	0.0748607
ENSOARG00020012558		0.0325515	0.0748935
ENSOARG00020007832	SPR	0.0320591	0.0750955
ENSOARG00020013355	ANPEP	0.0344884	0.0750955
ENSOARG00020015161	TRIM37	0.0314008	0.0751157
ENSOARG00020024064	TGFBR2	0.0240355	0.0752381
ENSOARG00020018231	TBC1D2B	0.0225167	0.075713
ENSOARG00020010160	RARRES2	0.0313032	0.075947
ENSOARG00020007083		0.0156593	0.0761175
ENSOARG00020004782	CPEB2	0.0298541	0.0761279
ENSOARG00020003823	PROCR	0.0376179	0.0765157
ENSOARG00020026120	MRPL24	0.0237225	0.0765541
ENSOARG00020019214	CDO1	0.0410745	0.0766975
ENSOARG00020017721	ACYP1	0.03931	0.0767828
ENSOARG00020011391	KCTD12	0.0293087	0.0777418
ENSOARG00020009820	SESN1	0.0401402	0.0777418
ENSOARG00020023956	FAIM2	0.0272824	0.0779386
ENSOARG00020024633		0.0373715	0.0784894
ENSOARG00020008439	CD86	0.0214715	0.0787818
ENSOARG00020001937		0.00830166	0.0788949
ENSOARG00020017864	IQGAP1	0.041285	0.0789377
ENSOARG00020009778	TGM2	0.00392851	0.0789443
ENSOARG00020000523	COL28A1	0.0273522	0.0790603
ENSOARG00020019073	ERCC4	0.00597617	0.0792805
ENSOARG00020002756	TMSB10	0.00668235	0.0794454
ENSOARG00020025324	ARHGAP27	0.00881708	0.0794454
ENSOARG00020009049	NTF3	0.0440671	0.0794454
ENSOARG00020022370		0.00314678	0.079639
ENSOARG00020020358	CYBB	0.0240355	0.079639
ENSOARG00020014649		0.0320961	0.079639
ENSOARG00020011610	SORCS1	0.0369428	0.0797839
ENSOARG00020022583	UGCG	0.0330574	0.0799861
ENSOARG00020020036	RPS12	0.0340518	0.0799861
ENSOARG00020006995		0.0309131	0.08122
ENSOARG00020004609		0.0172198	0.0814422
ENSOARG00020026084	NUPR1	0.0320705	0.0818247
ENSOARG00020000160	WNT2	0.0170449	0.0818745
ENSOARG00020006185	SON	0.00128267	0.0823897
ENSOARG00020014240		0.0113706	0.0824304
ENSOARG00020006198	ADCY7	0.0219568	0.0824784
ENSOARG00020022517	SCPEP1	0.0117992	0.0825991
ENSOARG00020007844	TMEFF2	0.0494223	0.0825991
ENSOARG00020012848		0.0323481	0.083001
ENSOARG00020025879	RPL29	0.0234888	0.0831096
ENSOARG00020025547	SDR16C5	0.0470802	0.0831096
ENSOARG00020023191	SCTR	0.0179063	0.0834148
ENSOARG00020017211	SF3A3	0.0420979	0.0834148
ENSOARG00020024797		0.0158604	0.0838472
ENSOARG00020008756	GSE1	0.0181591	0.0840534
ENSOARG00020022511	TMEM171	0.0253337	0.0840534
ENSOARG00020006862	CSMD2	0.0374642	0.0840534
ENSOARG00020012008	TIMM10	0.0279635	0.0844432
ENSOARG00020023385		0.0234896	0.0847053
ENSOARG00020006234		0.00323961	0.0847679
ENSOARG00020009994	NIPSNAP1	0.049909	0.0847679
ENSOARG00020005535	EPAS1	0.0303626	0.0849815
ENSOARG00020024350	LYAR	0.0422549	0.0858874
ENSOARG00020005313	SFT2D2	0.0280812	0.0862158
ENSOARG00020020684	AKIP1	0.0494223	0.0862158
ENSOARG00020003454	IRS2	0.0313666	0.0869762
ENSOARG00020004077		0.0277387	0.0874046
ENSOARG00020018035	MLLT6	0.0170993	0.0874621
ENSOARG00020005088	FADS6	0.0213603	0.0877943
ENSOARG00020019754	ASAH1	0.0293087	0.0877943
ENSOARG00020026005	RPL38	0.0190393	0.0882661
ENSOARG00020015164	LUZP1	0.045052	0.0906038
ENSOARG00020016091		0.0220094	0.0909253
ENSOARG00020024164	ITIH4	0.034359	0.0911389
ENSOARG00020011056	HIF1A	0.00733572	0.0915002
ENSOARG00020009324		0.039338	0.0915002
ENSOARG00020001142	KMT2D	0.0190393	0.0915829
ENSOARG00020007950	GEMIN8	0.0148263	0.0918055
ENSOARG00020009447	CCAR1	0.00929068	0.091869
ENSOARG00020022924	NOG	0.045052	0.091869
ENSOARG00020015595	CCDC69	0.0479927	0.091869
ENSOARG00020014962	GNG8	0.0185148	0.0920341
ENSOARG00020015627	PEX2	0.027712	0.092539
ENSOARG00020007944	KLF6	0.00564193	0.0927781
ENSOARG00020013312	MYO6	0.00348628	0.0928873
ENSOARG00020020217		0.0408285	0.0928873
ENSOARG00020013107	CPVL	0.0259451	0.0929884
ENSOARG00020015906	LUC7L	0.0400071	0.0930881
ENSOARG00020006099	CSPP1	0.0341675	0.0936092
ENSOARG00020012370	RBFOX3	0.00522436	0.0939515
ENSOARG00020002423	RPL7A	0.0050275	0.0940603
ENSOARG00020015908	CYP46A1	0.0179826	0.0940603
ENSOARG00020007102	PAPSS2	0.0396983	0.0942395
ENSOARG00020025785	RPL32	0.00761566	0.0946135
ENSOARG00020013410	PCDHAC2	0.0304488	0.0946135
ENSOARG00020021496		0.000123937	0.0951421
ENSOARG00020007993	RPL37	0.00232988	0.0959418
ENSOARG00020010355	PSMD1	0.0251987	0.0962651
ENSOARG00020016985	RPS26	0.00973139	0.0965077
ENSOARG00020022340	NOXA1	0.0292368	0.0971274
ENSOARG00020004422	RPL28	0.0323845	0.0972162
ENSOARG00020017381	GXYLT2	0.0209043	0.0975882
ENSOARG00020006358		0.0448182	0.0975882
ENSOARG00020015674	TMEM38A	0.0422549	0.0982801
ENSOARG00020002887	FRS2	0.0407898	0.0987706
ENSOARG00020005272	ZNF608	0.0369661	0.0988243
ENSOARG00020011023	PRRC2C	0.00188685	0.0989744
ENSOARG00020010589	SPON2	0.0480572	0.0989744
ENSOARG00020009589	ATP13A3	0.0340698	0.0996342
ENSOARG00020006701	LGALS1	0.00671774	0.100018
ENSOARG00020011341	DUSP26	0.00961824	0.100018
ENSOARG00020013720	FSTL5	0.00711461	0.100302
ENSOARG00020007802	ZNF593	0.0351946	0.100529
ENSOARG00020012441		0.0282009	0.100599
ENSOARG00020020030	JMJD8	0.0185148	0.101578
ENSOARG00020019850		0.0395398	0.101578
ENSOARG00020017062	PIKFYVE	0.018652	0.10189
ENSOARG00020022073	EIF1AD	0.00541098	0.102377
ENSOARG00020023843	YWHAG	0.0224816	0.102614
ENSOARG00020013078	ADPRS	0.0231186	0.102836
ENSOARG00020008981		0.00982956	0.103478
ENSOARG00020023068	HIP1	0.0131596	0.10367
ENSOARG00020020326	LHB	0.0406006	0.10367
ENSOARG00020013210	NGDN	0.0494414	0.103956
ENSOARG00020004259	SIGLEC1	0.0069436	0.104055
ENSOARG00020000864	C9orf116	0.0162727	0.104358
ENSOARG00020004254	SYNJ2	0.0498071	0.104528
ENSOARG00020017617	ACSL5	0.0279045	0.104585
ENSOARG00020002164	EPHB3	0.0231869	0.104748
ENSOARG00020016759	GALNT17	0.0327986	0.105249
ENSOARG00020000834	STK31	0.0491525	0.105249
ENSOARG00020012137	EDEM1	0.0107731	0.105543
ENSOARG00020009956		0.027712	0.106349
ENSOARG00020009065		0.0113705	0.106625
ENSOARG00020021892	ALDH1A2	0.0277387	0.10685
ENSOARG00020014465	ANKFY1	0.0321987	0.10685
ENSOARG00020018621	ME3	0.0301649	0.106914
ENSOARG00020018117	SASH1	0.0128569	0.107079
ENSOARG00020001101	MAN1A2	0.0367923	0.107968
ENSOARG00020016337		0.00896494	0.108404
ENSOARG00020016596		0.0368823	0.108404
ENSOARG00020021256	EFEMP2	0.0440123	0.108404
ENSOARG00020019407	HECTD4	0.0170829	0.108462
ENSOARG00020010106	MRPL52	0.0239253	0.108462
ENSOARG00020020757	IPMK	0.00056524	0.108483
ENSOARG00020007562	TMCC2	0.0426153	0.108547
ENSOARG00020016288	KCNJ14	0.0101057	0.110482
ENSOARG00020012425	GALC	0.0153589	0.110755
ENSOARG00020005812	RNase_MRP	0.0186255	0.110755
ENSOARG00020007774	EMC1	0.0143014	0.111377
ENSOARG00020021349	ELOVL5	0.00166247	0.111601
ENSOARG00020020334	Metazoa_SRP	0.00166247	0.112408
ENSOARG00020014094	SPNS2	0.0029504	0.112412
ENSOARG00020017261	GLA	0.045449	0.112412
ENSOARG00020000869	UBL5	0.0284951	0.112479
ENSOARG00020013762	KDM5A	0.00961824	0.11249
ENSOARG00020012170	LGALS3BP	0.0219637	0.112889
ENSOARG00020015662	SLC35G2	0.0303724	0.112889
ENSOARG00020019074		0.0425946	0.113269
ENSOARG00020008771	IFIT2	0.0422549	0.113269
ENSOARG00020016123	FAU	0.0376268	0.113363
ENSOARG00020001904	MGST3	0.0177309	0.113914
ENSOARG00020007998	MAGEL2	0.045052	0.113914
ENSOARG00020013978	LCN2	0.0396923	0.11411
ENSOARG00020011216	MFN2	0.0282791	0.114473
ENSOARG00020014603	RGS10	0.0317696	0.114598
ENSOARG00020013348	ACSL1	0.0360504	0.115304
ENSOARG00020006413	FBN1	0.0399421	0.115378
ENSOARG00020000996	UQCRH	0.0306539	0.116411
ENSOARG00020021458	RPL10	0.0354525	0.11774
ENSOARG00020025722	HIGD1B	0.0391713	0.117812
ENSOARG00020021084		0.00313213	0.117928
ENSOARG00020011453		0.0251987	0.118328
ENSOARG00020024489	CMTM6	0.0438239	0.118328
ENSOARG00020005921	PIK3C2A	0.00291842	0.11904
ENSOARG00020011060		0.0167625	0.11904
ENSOARG00020004819	MEF2A	0.0228932	0.11904
ENSOARG00020018785	TMEM9	0.0353366	0.119948
ENSOARG00020017320	FADS1	0.0214028	0.1215
ENSOARG00020006215		0.0284951	0.12196
ENSOARG00020009018		0.00196983	0.122545
ENSOARG00020024681	ATXN7	0.032686	0.122832
ENSOARG00020013555		0.0416774	0.122846
ENSOARG00020022050	RPL10A	0.0083044	0.122867
ENSOARG00020022954	FLT3LG	0.0240355	0.123068
ENSOARG00020025218	CSPG5	0.0334628	0.123068
ENSOARG00020013266	RDX	0.00962779	0.1235
ENSOARG00020003282	MAF	0.0318011	0.1235
ENSOARG00020000897	FABP1	0.0496061	0.1235
ENSOARG00020007653	MBOAT2	0.0101057	0.123877
ENSOARG00020018839	SLC13A3	0.0150199	0.124706
ENSOARG00020011063	VSIG8	0.0180667	0.125844
ENSOARG00020018469	ARID5A	0.0303505	0.125844
ENSOARG00020018440	CCND1	0.0223528	0.126102
ENSOARG00020009246	DDX17	0.00961824	0.126562
ENSOARG00020014263	CDC42EP5	0.0121971	0.126562
ENSOARG00020015738	SEC14L3	0.0391019	0.126667
ENSOARG00020001198		0.0410745	0.126667
ENSOARG00020000257	HOXD3	0.0183851	0.12702
ENSOARG00020019849	NPR3	0.0197537	0.12702
ENSOARG00020021941	DLK2	0.0284951	0.127077
ENSOARG00020013165	CDC42BPG	0.0301797	0.127166
ENSOARG00020012479	SHROOM4	0.0316259	0.127427
ENSOARG00020025228	PIN4	0.049909	0.128545
ENSOARG00020008507	CDH1	0.0416774	0.128779
ENSOARG00020010545		0.0320961	0.129672
ENSOARG00020005540	EXOSC4	0.0376569	0.129699
ENSOARG00020003778	SHCBP1L	0.0153433	0.130586
ENSOARG00020017452	GNGT1	0.0399745	0.131338
ENSOARG00020022466		0.000619734	0.132025
ENSOARG00020026227	TPSB2	0.0362979	0.132025
ENSOARG00020024395	DUSP4	0.0386243	0.132025
ENSOARG00020021025		0.0352147	0.132886
ENSOARG00020025780		0.00213596	0.133223
ENSOARG00020025158	USP35	0.0121559	0.133663
ENSOARG00020021045	TRIM4	0.0162031	0.133663
ENSOARG00020025226	TMEM33	0.0286294	0.133965
ENSOARG00020019307		0.0488177	0.135132
ENSOARG00020009041	MAFF	0.0128569	0.135421
ENSOARG00020002986	LRRN3	0.0116211	0.135881
ENSOARG00020008440		0.0456306	0.135881
ENSOARG00020013841	CMTM5	0.00930479	0.136569
ENSOARG00020001977	ZC3H6	0.0268199	0.136569
ENSOARG00020023417	TENM1	0.0260097	0.137224
ENSOARG00020011291	ARHGAP35	0.035391	0.137224
ENSOARG00020017740	NEFM	0.00116756	0.137286
ENSOARG00020000741	RPS27A	0.0209715	0.137286
ENSOARG00020023053	RENBP	0.0422549	0.137286
ENSOARG00020016481		0.0303626	0.137416
ENSOARG00020008442	PAQR7	0.0420979	0.139018
ENSOARG00020015562	CIRBP	0.027712	0.139166
ENSOARG00020023612	WWC3	0.0277387	0.139166
ENSOARG00020013006	GOT2	0.0243901	0.139695
ENSOARG00020003518		0.00263019	0.139706
ENSOARG00020018769	RPL14	0.0129758	0.13977
ENSOARG00020002283	CRAT	0.0360504	0.13977
ENSOARG00020022248	HTRA4	0.00697678	0.140046
ENSOARG00020017285		0.0124487	0.140046
ENSOARG00020023251		0.0327986	0.141505
ENSOARG00020021822		0.0325515	0.141815
ENSOARG00020007863	RAPH1	0.00851211	0.142149
ENSOARG00020008975		0.0355902	0.142205
ENSOARG00020002353	SNX13	0.0479927	0.142973
ENSOARG00020009460		0.0240355	0.143239
ENSOARG00020009801	GADD45GIP1	0.0303626	0.143947
ENSOARG00020021792	UGGT1	0.012477	0.143984
ENSOARG00020015550		0.0285627	0.144119
ENSOARG00020026100	QKI	0.027712	0.144591
ENSOARG00020001009	OLFML2B	0.0408995	0.145013
ENSOARG00020008091	CCDC181	0.00319544	0.145423
ENSOARG00020018601	TRIM62	0.0110581	0.145764
ENSOARG00020019396	HPCA	0.0146366	0.145849
ENSOARG00020002992	ARSB	0.0106675	0.146045
ENSOARG00020002639	CTSL	0.035391	0.147218
ENSOARG00020006137	CLDN5	0.035391	0.147218
ENSOARG00020022698	LGALS12	0.00806838	0.147789
ENSOARG00020024955	BTBD3	0.0306891	0.147904
ENSOARG00020004547		0.00989007	0.147912
ENSOARG00020011926	SLC43A1	0.0225167	0.147912
ENSOARG00020004062	UBQLN1	0.0352147	0.147912
ENSOARG00020018979		0.0447912	0.147912
ENSOARG00020018444	MOGAT1	0.014519	0.148078
ENSOARG00020025244	ENO3	0.0408995	0.148421
ENSOARG00020004225	GPR37	0.0189969	0.149137
ENSOARG00020021579	RPL27A	0.0163785	0.151855
ENSOARG00020002265	IER5L	0.0223528	0.151876
ENSOARG00020012001	MYOC	0.031752	0.151973
ENSOARG00020015564		0.0491718	0.151973
ENSOARG00020017730	TMEM132E	0.0316936	0.153995
ENSOARG00020020315	NKIRAS1	0.0180667	0.155351
ENSOARG00020019356		0.0354711	0.155632
ENSOARG00020015425	LHX8	0.030575	0.156623
ENSOARG00020019465	ITPKB	0.0240355	0.156626
ENSOARG00020019504		0.0407898	0.159232
ENSOARG00020015171		0.00079261	0.159477
ENSOARG00020021035		0.0350481	0.159874
ENSOARG00020020041	BCL2L15	0.0424234	0.159874
ENSOARG00020017800	THSD4	0.00382388	0.160295
ENSOARG00020016286	U1	0.0322696	0.160295
ENSOARG00020019441	PPP1R15A	0.0297249	0.162133
ENSOARG00020005785	CCDC107	0.035391	0.16285
ENSOARG00020014529		0.0383833	0.16285
ENSOARG00020025061	JAGN1	0.0383833	0.163276
ENSOARG00020011880	EEF1D	0.0158314	0.164205
ENSOARG00020019577	AVPI1	0.0205966	0.164388
ENSOARG00020014349	CHD6	0.0458959	0.165401
ENSOARG00020009877	CEBPD	0.0110253	0.166142
ENSOARG00020026291	NME3	0.0498071	0.166356
ENSOARG00020015503	SAMD4A	0.0319694	0.166365
ENSOARG00020024877		0.0302938	0.16814
ENSOARG00020021999	CSPG4	0.0185122	0.169112
ENSOARG00020019907	RYR2	0.0463703	0.169112
ENSOARG00020001556	SP9	0.00385665	0.16956
ENSOARG00020016798	ARHGEF12	0.0261415	0.169596
ENSOARG00020017989	SPRY3	0.0237225	0.169914
ENSOARG00020002748		0.0425946	0.170242
ENSOARG00020013571	PKHD1L1	0.0139136	0.171036
ENSOARG00020005609	GSC2	0.0205163	0.171323
ENSOARG00020013502	NDUFS1	0.0372379	0.171323
ENSOARG00020021473		0.0225167	0.172245
ENSOARG00020008005	SLC39A10	0.04494	0.172318
ENSOARG00020002883	ANKRD52	0.0162727	0.172554
ENSOARG00020002994		0.0484442	0.172554
ENSOARG00020024590	PRCP	0.0438691	0.172748
ENSOARG00020011245	SLC2A3	0.0334463	0.173015
ENSOARG00020011218		0.00263714	0.174035
ENSOARG00020005596	PHF20	0.0170993	0.175046
ENSOARG00020023760	PPM1K	0.0120922	0.178519
ENSOARG00020014287	PHIP	0.0178216	0.180026
ENSOARG00020017255		0.00405558	0.181176
ENSOARG00020008962		0.0421593	0.181176
ENSOARG00020023856	ZNF609	0.0498864	0.18323
ENSOARG00020001586	EHHADH	0.0218904	0.184022
ENSOARG00020023427	C11orf95	0.0464946	0.184022
ENSOARG00020011296	NEK7	0.0219855	0.184477
ENSOARG00020012417	BHLHE40	0.035391	0.185792
ENSOARG00020014832	CRISPLD1	0.0204392	0.187916
ENSOARG00020021132		0.0325515	0.189458
ENSOARG00020013779	RPL11	0.0387049	0.189458
ENSOARG00020023606	RPL9	0.0259451	0.19096
ENSOARG00020006759		0.0284951	0.192749
ENSOARG00020001330		0.0220168	0.192767
ENSOARG00020004329	MAST4	0.0389306	0.193379
ENSOARG00020010758		0.0323619	0.194815
ENSOARG00020005306	SMC4	0.0392036	0.194815
ENSOARG00020020313	BAMBI	0.049942	0.195693
ENSOARG00020021478	RABAC1	0.0277387	0.196377
ENSOARG00020025515	RPS20	0.0171826	0.196674
ENSOARG00020000757	KCNH3	0.017338	0.196768
ENSOARG00020025862	RBSN	0.0172943	0.19832
ENSOARG00020012202	PDE6B	0.00276126	0.198776
ENSOARG00020004532		0.0483544	0.200292
ENSOARG00020009588	CXCL14	0.0363021	0.202146
ENSOARG00020023151	PHACTR1	0.0214598	0.202406
ENSOARG00020014286	ZDBF2	0.0494414	0.202436
ENSOARG00020026177	KIRREL1	0.0413497	0.203628
ENSOARG00020002208	TOMM5	0.0214478	0.204927
ENSOARG00020008172	ATP5MD	0.0194331	0.20513
ENSOARG00020015342	GMFB	0.0408995	0.207483
ENSOARG00020012201	PFKFB2	0.0302021	0.208185
ENSOARG00020009970	OSER1	0.0311425	0.208241
ENSOARG00020019826	TMEM61	0.0180667	0.208333
ENSOARG00020012320	RPL31	0.0142619	0.208953
ENSOARG00020008950	CD164	0.0292286	0.209217
ENSOARG00020015383		0.0494414	0.209792
ENSOARG00020010913	Bst-2B	0.0279961	0.209957
ENSOARG00020001247	ATP6V1A	0.0291147	0.210198
ENSOARG00020024392	ZC3H7B	0.0374642	0.210228
ENSOARG00020003287	PHYH	0.0335283	0.211082
ENSOARG00020016261	NECTIN1	0.0112991	0.211332
ENSOARG00020021196	FABP7	0.0305779	0.21173
ENSOARG00020025466	PDZD8	0.00966464	0.212118
ENSOARG00020011684	CLIC5	0.00177571	0.214702
ENSOARG00020022143	MRPS23	0.0399421	0.214755
ENSOARG00020021925	EIF3D	0.0316156	0.217658
ENSOARG00020023218	MEF2C	0.0204755	0.219315
ENSOARG00020002620	FBP2	0.00995526	0.219664
ENSOARG00020019809	CPEB4	0.00234946	0.220041
ENSOARG00020005588		0.00764024	0.220737
ENSOARG00020017516		0.0489322	0.221067
ENSOARG00020008102	BCS1L	0.0450911	0.222717
ENSOARG00020013743	CHAD	0.0273522	0.224328
ENSOARG00020005236	HDC	0.049909	0.22464
ENSOARG00020013838	TP53INP2	0.0267983	0.225941
ENSOARG00020019393		0.0107731	0.225957
ENSOARG00020017886	TMC6	0.0181375	0.226376
ENSOARG00020026321	NDUFB10	0.0460296	0.226376
ENSOARG00020011418		0.0237183	0.226563
ENSOARG00020016924	LASP1	0.0397394	0.227256
ENSOARG00020025736	NAV2	0.00961824	0.227304
ENSOARG00020007931		0.0277387	0.227349
ENSOARG00020008673	SMPD2	0.0300256	0.227436
ENSOARG00020000492		0.00166247	0.227702
ENSOARG00020020785		0.0458395	0.229053
ENSOARG00020018304	NIT1	0.0253671	0.229433
ENSOARG00020017791		0.0334424	0.229692
ENSOARG00020024401		0.029029	0.232905
ENSOARG00020009909	ZNF862	0.0407993	0.234454
ENSOARG00020020350	ANKS1A	0.0316789	0.234628
ENSOARG00020003850	PRELP	0.0322696	0.235404
ENSOARG00020003148	JMY	0.0440671	0.236468
ENSOARG00020002625	EPHA3	0.00762893	0.237109
ENSOARG00020023581	QSOX1	0.0334424	0.237573
ENSOARG00020017849	MPP2	0.0102532	0.238879
ENSOARG00020022400	VAT1L	0.0409655	0.240097
ENSOARG00020025410		0.0489322	0.240364
ENSOARG00020001418		0.0170993	0.242648
ENSOARG00020008140	KITLG	0.00875133	0.246378
ENSOARG00020001785	TMEM245	0.0180667	0.24736
ENSOARG00020013209		0.02576	0.250854
ENSOARG00020000157	MYLK	0.027712	0.251841
ENSOARG00020026148	AFDN	0.045568	0.254716
ENSOARG00020019629		0.0425946	0.255022
ENSOARG00020001702	CTSV	0.0165056	0.255804
ENSOARG00020025433		0.0223992	0.263258
ENSOARG00020005164	ADCK1	0.0360504	0.266
ENSOARG00020000778	COL8A1	0.0448182	0.26665
ENSOARG00020000952		0.0424234	0.268119
ENSOARG00020021963		0.0292286	0.268676
ENSOARG00020023831	KCTD20	0.0256935	0.268731
ENSOARG00020011553	BPTF	0.0451989	0.270168
ENSOARG00020015488	HMGN5	0.0329601	0.270598
ENSOARG00020019571	ANKRD12	0.0365352	0.272434
ENSOARG00020013105		0.027712	0.277876
ENSOARG00020010274	SLC9B2	0.0456431	0.279777
ENSOARG00020022097	NAV1	0.0149699	0.282714
ENSOARG00020012015	ITGA11	0.0279635	0.285655
ENSOARG00020003710		0.00450961	0.287883
ENSOARG00020012910	KCND3	0.0027872	0.294664
ENSOARG00020021809	AKAP12	0.0425946	0.295661
ENSOARG00020020174	TMEM154	0.0150199	0.296849
ENSOARG00020024292	APBB2	0.0462472	0.297489
ENSOARG00020005618		0.0220094	0.306076
ENSOARG00020011766	DUOXA2	0.0013978	0.306588
ENSOARG00020019109	SLC16A2	0.0198372	0.307237
ENSOARG00020026371	SNCG	0.00276391	0.313858
ENSOARG00020000050	KCNQ4	0.035391	0.328266
ENSOARG00020008466	PTGER4	0.0153589	0.331362
ENSOARG00020014578	KCNK1	0.0263698	0.331362
ENSOARG00020021597		0.0205163	0.332376
ENSOARG00020006742		0.0371772	0.332376
ENSOARG00020016620	ZNF385A	0.0391019	0.332376
ENSOARG00020019052		0.0469918	0.333222
ENSOARG00020001437		0.0337589	0.343233
ENSOARG00020005817	PPP1R12A	0.0233154	0.344221
ENSOARG00020007019	PFDN5	0.0424234	0.345997
ENSOARG00020001607		0.0149699	0.347226
ENSOARG00020013714	NHLRC1	0.0145469	0.356919
ENSOARG00020017117	MMP9	0.0408995	0.371495
ENSOARG00020009028	SLC16A14	0.0487671	0.37301
ENSOARG00020023364	TECPR1	0.0407898	0.377756
ENSOARG00020001505	IL1RN	0.015527	0.384265
ENSOARG00020002184	MECOM	0.019955	0.384642
ENSOARG00020019478	FAM133A	0.0121971	0.389033
ENSOARG00020016546		0.0471259	0.395922
ENSOARG00020010069	RPS5	0.0272742	0.40807
ENSOARG00020004742	LYSMD4	0.0383833	0.410479
ENSOARG00020010029		0.00780815	0.435923
ENSOARG00020009922	SLU7	0.0367923	0.45282
ENSOARG00020022483	HHATL	0.0424234	0.461125
ENSOARG00020014499	PPM1J	0.042369	0.472981
ENSOARG00020010293	SMAD5	0.0473661	0.475668
ENSOARG00020021594	CCL16	0.035391	0.479406
ENSOARG00020025313	TNRC6A	0.0491428	0.516503
ENSOARG00020024278	PPP1R3B	0.0494414	0.518822
ENSOARG00020005843	RPS21	0.0194993	0.52417
ENSOARG00020004743		0.0413497	0.542296
ENSOARG00020010508	MTMR12	0.0462472	0.758504
ENSOARG00020017391	PDCD5	0.0501039	0.0318921
ENSOARG00020003535		0.0501436	0.0375646
ENSOARG00020008474		0.0501436	0.0360443
ENSOARG00020012985	MYO9B	0.0502711	0.172148
ENSOARG00020021866	SRSF1	0.0502747	0.234454
ENSOARG00020022406	ARPC1B	0.0502849	0.097749
ENSOARG00020010787	PSMB2	0.0504179	0.0735019
ENSOARG00020025342	XRCC5	0.0505296	0.0337767
ENSOARG00020004341	MYL6	0.0506946	0.0612017
ENSOARG00020001496	CRIM1	0.050746	0.137286
ENSOARG00020022299	SS18L2	0.050746	0.123068
ENSOARG00020009039	MDP1	0.0508117	0.0662476
ENSOARG00020001760	LTBP1	0.0508278	0.0681424
ENSOARG00020007323		0.0508304	0.0680898
ENSOARG00020017434	LRRC42	0.0508304	0.0575114
ENSOARG00020022821	SLC25A20	0.0508692	0.0372127
ENSOARG00020024179	PLCB4	0.0508692	0.0566441
ENSOARG00020013336	XAF1	0.0510058	0.083471
ENSOARG00020012692	ZC3H12C	0.0510321	0.0834148
ENSOARG00020025029	KCNIP2	0.0510321	0.136713
ENSOARG00020007274	CDC123	0.0513871	0.0428549
ENSOARG00020001547	CIR1	0.0514368	0.0612017
ENSOARG00020012813	UHRF1	0.0514368	0.0516787
ENSOARG00020001319	PHF14	0.0514837	0.0651577
ENSOARG00020003179	PLLP	0.0514837	0.114473
ENSOARG00020005583	MAST3	0.0514837	0.050469
ENSOARG00020023975	IRX2	0.0514837	0.260148
ENSOARG00020024900	MED29	0.0514837	0.197404
ENSOARG00020024908	ZFP36	0.051516	0.0484062
ENSOARG00020024466	PIP4K2A	0.0516797	0.222717
ENSOARG00020000285	NCF4	0.051931	0.0622996
ENSOARG00020017564	RASIP1	0.052053	0.0959418
ENSOARG00020026024	KIF19	0.0521234	0.0612126
ENSOARG00020012995	DAAM2	0.0522063	0.200955
ENSOARG00020014792	PTPRT	0.0525163	0.0687496
ENSOARG00020018583	NEXN	0.0525691	0.0568246
ENSOARG00020000968	ADGRL1	0.0528805	0.224394
ENSOARG00020001374	WDR91	0.0528805	0.172748
ENSOARG00020007175		0.0528805	0.0516787
ENSOARG00020012764	RPS25	0.0528805	0.28633
ENSOARG00020013956	CCDC40	0.0529634	0.0577285
ENSOARG00020014445	ANXA13	0.0530903	0.0726057
ENSOARG00020000169	FCER1G	0.0532063	0.0585252
ENSOARG00020006271		0.0532063	0.124706
ENSOARG00020010531		0.0532619	0.0290492
ENSOARG00020021092	CLEC10A	0.0532768	0.107968
ENSOARG00020021669	ANGPTL5	0.0533016	0.0584367
ENSOARG00020023796	ARRDC3	0.0534407	0.050469
ENSOARG00020003476	RPL8	0.0535239	0.359501
ENSOARG00020019659	RHOU	0.0535408	0.243908
ENSOARG00020015645	AK1	0.0536158	0.0702098
ENSOARG00020010165	HDHD2	0.0538134	0.0639145
ENSOARG00020003288	MYH7B	0.0538828	0.189875
ENSOARG00020000574	LPL	0.0539501	0.243632
ENSOARG00020023758	ABLIM1	0.0539501	0.127141
ENSOARG00020025445		0.0539501	0.0443481
ENSOARG00020019518		0.0540896	0.275679
ENSOARG00020017850	ABHD15	0.0541465	0.0616747
ENSOARG00020004157	GADD45G	0.0541526	0.323921
ENSOARG00020014318		0.0543706	0.134513
ENSOARG00020008056	SNRPN	0.054421	0.0257516
ENSOARG00020010938	ZFAND2B	0.054421	0.111569
ENSOARG00020012888	EIF4A1	0.054421	0.0415553
ENSOARG00020012967	NOX5	0.054421	0.217705
ENSOARG00020023090	PPP2R2C	0.054421	0.11249
ENSOARG00020010467	GSDMB	0.0544578	0.0595949
ENSOARG00020001611	PER2	0.0545563	0.265065
ENSOARG00020008724	MAP1A	0.0545563	0.0824784
ENSOARG00020025533	CHCHD7	0.0545563	0.0516787
ENSOARG00020015409	STAP2	0.0545735	0.140343
ENSOARG00020002550	CADPS2	0.0545925	0.0621891
ENSOARG00020013230	PLAC8	0.0545925	0.0349992
ENSOARG00020005774		0.0547746	0.0604873
ENSOARG00020009186	KCNA6	0.0548175	0.0900141
ENSOARG00020023834	CWC15	0.0548426	0.0476433
ENSOARG00020025006	RREB1	0.0548426	0.0688238
ENSOARG00020025179	GCGR	0.0548426	0.0951995
ENSOARG00020006299	PLEC	0.0548869	0.135421
ENSOARG00020019588		0.054957	0.209332
ENSOARG00020014291	LRRN1	0.0550534	0.101978
ENSOARG00020018081	TMEM41B	0.0550534	0.160295
ENSOARG00020005584	C20orf194	0.055143	0.135199
ENSOARG00020001311	IL27RA	0.0552586	0.110482
ENSOARG00020002814	POLR1F	0.0552586	0.219261
ENSOARG00020009532	HAND2	0.0553404	0.0735019
ENSOARG00020019782	NCAM1	0.0553429	0.0411392
ENSOARG00020003490	NOP10	0.0554115	0.0928873
ENSOARG00020013482	KRT85	0.0554115	0.0795959
ENSOARG00020023264	ABHD5	0.0554115	0.0466266
ENSOARG00020026205		0.0554115	0.124164
ENSOARG00020014160		0.0558094	0.11904
ENSOARG00020025424	ASPSCR1	0.0558094	0.12825
ENSOARG00020024613		0.055813	0.140676
ENSOARG00020013195	RASGEF1C	0.0559827	0.124771
ENSOARG00020011252		0.0561465	0.467181
ENSOARG00020025507		0.0561617	0.079639
ENSOARG00020014175	NDRG2	0.0561746	0.0664743
ENSOARG00020000517	NDUFB7	0.0562274	0.0691661
ENSOARG00020008684	NFIX	0.0562274	0.19096
ENSOARG00020010060		0.0562274	0.0752381
ENSOARG00020016163	EPHB2	0.0562274	0.294514
ENSOARG00020017425	TAB3	0.0562274	0.265065
ENSOARG00020022122	SLC22A8	0.0562274	0.138602
ENSOARG00020022219	RPS19	0.0562274	0.194773
ENSOARG00020022614	MLEC	0.0562274	0.218042
ENSOARG00020011634	CALML4	0.0562729	0.045939
ENSOARG00020000226		0.0563178	0.139166
ENSOARG00020011522	SNRPD2	0.0564227	0.155478
ENSOARG00020004419		0.0564902	0.079639
ENSOARG00020005455	ROMO1	0.0566247	0.0797839
ENSOARG00020002025	RPL24	0.056699	0.232276
ENSOARG00020007597	GNS	0.056699	0.230877
ENSOARG00020011635		0.056699	0.0383896
ENSOARG00020015656		0.056699	0.152082
ENSOARG00020020085	TP53I3	0.056699	0.154422
ENSOARG00020022975	RNF128	0.056699	0.159444
ENSOARG00020025253		0.056699	0.131618
ENSOARG00020000116	ADAMTS4	0.0568951	0.0915002
ENSOARG00020019892	LAMTOR4	0.0568951	0.170242
ENSOARG00020008014	IWS1	0.0569806	0.0473805
ENSOARG00020000934	MED8	0.0572236	0.171113
ENSOARG00020018853	ETV2	0.0572236	0.217048
ENSOARG00020019427	UST	0.0572236	0.196623
ENSOARG00020019871	RPL13	0.0572236	0.225351
ENSOARG00020020026		0.0572236	0.0354062
ENSOARG00020023024	SERGEF	0.0572329	0.211945
ENSOARG00020020559		0.057265	0.0866886
ENSOARG00020024899	AMOT	0.0573222	0.232276
ENSOARG00020017599		0.0574075	0.0765541
ENSOARG00020012511	GNA12	0.0576838	0.0493084
ENSOARG00020008893	WIPF2	0.0578303	0.131338
ENSOARG00020012626	WDR46	0.0578882	0.150285
ENSOARG00020009046		0.0579195	0.06597
ENSOARG00020005322	ATP5PD	0.0580878	0.212118
ENSOARG00020019973	TRAK1	0.0581097	0.0874621
ENSOARG00020001599		0.058294	0.0917117
ENSOARG00020002173		0.058294	0.137645
ENSOARG00020002378	NCBP2	0.058294	0.0862158
ENSOARG00020002905	H2AZ2	0.058294	0.108285
ENSOARG00020006708	OXCT1	0.058294	0.359065
ENSOARG00020008152		0.058294	0.0719847
ENSOARG00020008663	EFR3A	0.058294	0.203626
ENSOARG00020010659	MVB12A	0.058294	0.109842
ENSOARG00020011459	YWHAB	0.058294	0.26101
ENSOARG00020018466	SNORA73	0.058294	0.0797839
ENSOARG00020024420	CCDC167	0.058294	0.0975882
ENSOARG00020015615	PLBD2	0.0583061	0.0516787
ENSOARG00020017226	PDP2	0.0583061	0.408807
ENSOARG00020004872	PFN2	0.0584377	0.0426114
ENSOARG00020011955		0.0584377	0.10604
ENSOARG00020007838		0.0584926	0.202423
ENSOARG00020008195	TRMT112	0.0585357	0.155555
ENSOARG00020021294		0.0585357	0.207483
ENSOARG00020006920		0.0586281	0.0692577
ENSOARG00020010522	TSPAN17	0.0586281	0.196707
ENSOARG00020014721	LTC4S	0.0586281	0.14709
ENSOARG00020020408	NRIP3	0.0586281	0.0470531
ENSOARG00020020903	C18H15orf40	0.0586471	0.0852375
ENSOARG00020015888	EPB41	0.0587868	0.0689014
ENSOARG00020019431	CREBRF	0.0587868	0.145704
ENSOARG00020023534	TMEM120A	0.0588234	0.0817282
ENSOARG00020024788	SLC14A1	0.0588928	0.247297
ENSOARG00020018255	PFDN2	0.0588957	0.0828104
ENSOARG00020009650	IGF1	0.0591031	0.170419
ENSOARG00020009528	KIAA0232	0.059148	0.23248
ENSOARG00020009016	SNTB2	0.0591499	0.140602
ENSOARG00020015153		0.0592647	0.257532
ENSOARG00020017196	MOSPD3	0.0593573	0.06597
ENSOARG00020007502	CAPN5	0.0593639	0.0472656
ENSOARG00020014752	ELFN1	0.0594257	0.122663
ENSOARG00020013659		0.0594807	0.277499
ENSOARG00020021475	CLDND2	0.0594807	0.43655
ENSOARG00020018551	CYP2W1	0.0595375	0.186362
ENSOARG00020003950	ADAMTS1	0.059678	0.0626322
ENSOARG00020022080	SEMA5A	0.0597286	0.146732
ENSOARG00020000127	PTGR1	0.0597587	0.456635
ENSOARG00020001477	RGS5	0.0597587	0.0871002
ENSOARG00020001855	BMT2	0.0597675	0.277612
ENSOARG00020006959		0.0597675	0.0918055
ENSOARG00020025148	TIAM2	0.0598953	0.110037
ENSOARG00020018965	KLKB1	0.0599808	0.0607144
ENSOARG00020019410	SORL1	0.0600854	0.264988
ENSOARG00020006381	ACTR1A	0.0601324	0.101713
ENSOARG00020007791	IGFBP4	0.0601705	0.0430016
ENSOARG00020002299	PDZK1IP1	0.0602125	0.0500178
ENSOARG00020009381	FUOM	0.0602125	0.0508903
ENSOARG00020009661	GALNT7	0.0602125	0.0946135
ENSOARG00020024864		0.0602125	0.252071
ENSOARG00020022344	AURKB	0.0602329	0.077566
ENSOARG00020017006	ACSM1	0.0603282	0.0750955
ENSOARG00020014710	GDPD1	0.0603964	0.454173
ENSOARG00020011837	APOBEC3Z3	0.0605256	0.0566441
ENSOARG00020013962		0.0605859	0.06597
ENSOARG00020010304		0.0605964	0.17454
ENSOARG00020014299	WNK1	0.0606557	0.223175
ENSOARG00020013585	NDUFV1	0.0606968	0.0963721
ENSOARG00020017433	DNAJC16	0.0608792	0.41779
ENSOARG00020016686		0.0608901	0.0672954
ENSOARG00020004843		0.0612307	0.0789443
ENSOARG00020009208	ZNF511	0.0612307	0.0769093
ENSOARG00020007306		0.0613629	0.0366449
ENSOARG00020013077	DRAXIN	0.0613629	0.0922614
ENSOARG00020013759	ZNF414	0.0613629	0.108547
ENSOARG00020023408	NOP58	0.0613629	0.0582156
ENSOARG00020025938		0.0613629	0.0951432
ENSOARG00020009050	PCSK5	0.0613631	0.114473
ENSOARG00020005261		0.0615465	0.141815
ENSOARG00020023089	DBI	0.0617201	0.359065
ENSOARG00020009292	CALY	0.0617286	0.209217
ENSOARG00020013977		0.0617989	0.0975685
ENSOARG00020011569	NPTXR	0.0618181	0.177224
ENSOARG00020016456	MAN2A2	0.0619505	0.453745
ENSOARG00020021910	PEAK1	0.0622812	0.0882661
ENSOARG00020007045	MAPK8IP2	0.0623882	0.0874621
ENSOARG00020019984	GTF2A2	0.0623882	0.139166
ENSOARG00020020238		0.0623882	0.079639
ENSOARG00020022166		0.0623882	0.199719
ENSOARG00020019153	TF	0.0624881	0.196917
ENSOARG00020009032	PPP1R2	0.0625649	0.0892635
ENSOARG00020007509	U1	0.0627544	0.0963721
ENSOARG00020010862	DUSP10	0.0627544	0.0609061
ENSOARG00020012435		0.0627544	0.0570943
ENSOARG00020020490	MAN2A1	0.0627544	0.112253
ENSOARG00020020863	RAMAC	0.0627544	0.079639
ENSOARG00020024602	SYT17	0.0627544	0.204557
ENSOARG00020018485		0.0629395	0.135421
ENSOARG00020024826	PTH1R	0.0630495	0.12702
ENSOARG00020001775		0.0630501	0.0838472
ENSOARG00020020949	DNPH1	0.0631737	0.339358
ENSOARG00020021136	ATF3	0.0631737	0.13977
ENSOARG00020007692		0.0632144	0.0874319
ENSOARG00020010609	EEA1	0.0632459	0.178168
ENSOARG00020017607	FABP4	0.0632635	0.05236
ENSOARG00020022397	IMPDH2	0.0632819	0.0975727
ENSOARG00020010836	CHID1	0.063442	0.0662048
ENSOARG00020017051		0.0635537	0.302329
ENSOARG00020007746		0.0635817	0.138612
ENSOARG00020020532	MBNL3	0.0635817	0.318167
ENSOARG00020015217	PSD3	0.0636422	0.0748935
ENSOARG00020017567	FGF18	0.0636422	0.0582156
ENSOARG00020005629	NNT	0.0637646	0.166073
ENSOARG00020006500	RAB9A	0.0637646	0.315954
ENSOARG00020002260		0.0639029	0.210634
ENSOARG00020005777		0.0639029	0.110482
ENSOARG00020013814	ARHGAP20	0.0639029	0.0575114
ENSOARG00020014614	POLR1H	0.0639527	0.219988
ENSOARG00020020779	PURA	0.0640836	0.596663
ENSOARG00020000671	EBNA1BP2	0.0641465	0.0856925
ENSOARG00020002714	MRPL19	0.0641465	0.0871002
ENSOARG00020006388	SNRPD1	0.0641465	0.141815
ENSOARG00020013473	SDHAF2	0.0641465	0.127941
ENSOARG00020003495	IRGQ	0.0643005	0.0928873
ENSOARG00020003324	CCDC192	0.0643955	0.0614767
ENSOARG00020012156	TNPO2	0.0643955	0.057886
ENSOARG00020017079	COL4A5	0.0643955	0.172205
ENSOARG00020023446	TRAPPC1	0.0643955	0.207868
ENSOARG00020016414	ZBTB7A	0.0645082	0.291604
ENSOARG00020004036	UBR3	0.0646263	0.111554
ENSOARG00020011866	PHACTR2	0.0646263	0.260053
ENSOARG00020024612	MED11	0.0646554	0.0882661
ENSOARG00020023357	CCR10	0.0648156	0.145321
ENSOARG00020012892	MPDZ	0.0649153	0.184902
ENSOARG00020019993	SUGP1	0.0649153	0.107111
ENSOARG00020023942	NRK	0.0650068	0.217197
ENSOARG00020000787	NCEH1	0.0650983	0.224397
ENSOARG00020012958	PADI3	0.0651173	0.0971274
ENSOARG00020020014	BSN	0.0651173	0.358995
ENSOARG00020001900	STEAP1	0.0651548	0.13977
ENSOARG00020006932		0.0652474	0.0819103
ENSOARG00020018336	RPL12	0.0652474	0.0931542
ENSOARG00020019222		0.0652474	0.0968937
ENSOARG00020015985	F8	0.0654325	0.0606073
ENSOARG00020006402	TXNRD2	0.0656545	0.139706
ENSOARG00020014412	PRDX3	0.0656747	0.0540139
ENSOARG00020019678	MST1	0.065779	0.227737
ENSOARG00020002866	CD47	0.065882	0.254094
ENSOARG00020014091	CDH5	0.065882	0.327558
ENSOARG00020024356	IL17RC	0.0659228	0.0403606
ENSOARG00020022947	SIRT5	0.0659325	0.103406
ENSOARG00020006822	CPT1B	0.0659725	0.0834148
ENSOARG00020022377	FUT11	0.0661086	0.192033
ENSOARG00020016190	DERL1	0.0662189	0.0942395
ENSOARG00020001253	TBX15	0.0662271	0.0696715
ENSOARG00020025416	PPRC1	0.0662352	0.0915677
ENSOARG00020012896	SF3B5	0.0662682	0.236606
ENSOARG00020007179	SLC11A1	0.0664347	0.0958566
ENSOARG00020012433	USHBP1	0.0664746	0.0928873
ENSOARG00020001544	CLCN1	0.0664845	0.127166
ENSOARG00020010421	PANX1	0.0664845	0.0594289
ENSOARG00020026191	NME1	0.0664845	0.147912
ENSOARG00020000539		0.066565	0.254124
ENSOARG00020003400	THAP7	0.066565	0.150058
ENSOARG00020000596	CYP1B1	0.0665686	0.0735019
ENSOARG00020022538	LPGAT1	0.0665686	0.352285
ENSOARG00020020282	HIPK1	0.0666403	0.226563
ENSOARG00020007493	EIF3L	0.0670342	0.0391853
ENSOARG00020004762	ARF5	0.0670677	0.0574794
ENSOARG00020013425		0.0670677	0.484571
ENSOARG00020016729		0.0673669	0.140602
ENSOARG00020026062		0.0673669	0.140092
ENSOARG00020018043		0.0674141	0.0869762
ENSOARG00020004342	ERGIC3	0.0675013	0.432633
ENSOARG00020011131		0.0675022	0.241391
ENSOARG00020023337	CYP2J	0.067523	0.0614008
ENSOARG00020004966	TUBGCP3	0.0675603	0.0807662
ENSOARG00020000556	SLC44A3	0.0676028	0.144148
ENSOARG00020003273	LENG1	0.0676028	0.137889
ENSOARG00020014082	ASAP3	0.067772	0.11786
ENSOARG00020003204	ZNF575	0.0678543	0.248813
ENSOARG00020008929	GCNT1	0.0685307	0.190336
ENSOARG00020012980	UTRN	0.0686367	0.111554
ENSOARG00020013125	ZFYVE19	0.068664	0.0639145
ENSOARG00020008508	RNF216	0.0689093	0.213213
ENSOARG00020008582	RPL35	0.0689418	0.198738
ENSOARG00020023246	NAA10	0.0689506	0.147588
ENSOARG00020008877	METTL18	0.0692064	0.0420271
ENSOARG00020019272	TMEM54	0.0692843	0.147912
ENSOARG00020025436	EXOSC7	0.0692843	0.225891
ENSOARG00020008084	SMPD3	0.0692878	0.0547247
ENSOARG00020011887		0.0693123	0.666533
ENSOARG00020001813	FBLN7	0.069325	0.0639483
ENSOARG00020009525	MOB2	0.069325	0.117327
ENSOARG00020010309		0.069325	0.168469
ENSOARG00020012436	SETD1B	0.069325	0.139905
ENSOARG00020015963		0.069325	0.11971
ENSOARG00020025260		0.069325	0.184859
ENSOARG00020012275	FAM83D	0.0693846	0.103602
ENSOARG00020006989		0.0694408	0.143763
ENSOARG00020018460		0.0694408	0.181237
ENSOARG00020019885	UHRF1BP1	0.0694408	0.114223
ENSOARG00020020481	LPO	0.0694408	0.172205
ENSOARG00020026237	BAIAP3	0.0694408	0.457645
ENSOARG00020010987	CBY1	0.0694907	0.270598
ENSOARG00020017159	SH2B3	0.0694907	0.602566
ENSOARG00020024760	TCIM	0.0695241	0.151973
ENSOARG00020011643		0.0698618	0.166365
ENSOARG00020025217	NDUFC2	0.0699147	0.227702
ENSOARG00020001187	UHMK1	0.0699901	0.503559
ENSOARG00020017932	PPIP5K2	0.0699901	0.166735
ENSOARG00020022154	SDF2	0.0701082	0.0585252
ENSOARG00020015296		0.0701243	0.227256
ENSOARG00020023945	FECH	0.0701243	0.133663
ENSOARG00020025796	AP4E1	0.0701243	0.32968
ENSOARG00020004306		0.0703175	0.0915002
ENSOARG00020003365	PARM1	0.0704515	0.220529
ENSOARG00020013489	NDST1	0.0705911	0.285192
ENSOARG00020005460	FAM229B	0.0706794	0.228768
ENSOARG00020023927	CLASP1	0.0706794	0.152883
ENSOARG00020019524		0.0707678	0.117798
ENSOARG00020016698	UBR2	0.0707712	0.0860174
ENSOARG00020005147		0.0707735	0.255502
ENSOARG00020006392	SNRNP35	0.0707735	0.100624
ENSOARG00020024426	HSP90AB1	0.0707735	0.122867
ENSOARG00020001204		0.0708648	0.0537987
ENSOARG00020011958		0.0709072	0.093716
ENSOARG00020007956	EFNA4	0.0710096	0.144251
ENSOARG00020013172	NRP2	0.0710096	0.230596
ENSOARG00020021545	SH3GL3	0.0710096	0.100211
ENSOARG00020014304	ANGPTL7	0.0710299	0.0589881
ENSOARG00020015194	MPEG1	0.0710299	0.184739
ENSOARG00020019569	HDDC2	0.0710299	0.093378
ENSOARG00020001627	NRXN1	0.0711203	0.187229
ENSOARG00020005472	PSMC2	0.0711203	0.276761
ENSOARG00020009870	CFB	0.0711203	0.0346368
ENSOARG00020016662	RASGRF2	0.0711203	0.079936
ENSOARG00020020986	OSBPL6	0.0711203	0.27513
ENSOARG00020026077	OGFOD3	0.0711308	0.129344
ENSOARG00020005085	WWTR1	0.0711354	0.0699393
ENSOARG00020012134		0.0715391	0.477842
ENSOARG00020006888		0.0716517	0.172748
ENSOARG00020005895	DHTKD1	0.0716711	0.0726257
ENSOARG00020006727	KRT23	0.0716711	0.0639555
ENSOARG00020013477	TTYH3	0.0716711	0.0593432
ENSOARG00020007960		0.0718868	0.0372127
ENSOARG00020008158	COL16A1	0.0718868	0.194429
ENSOARG00020011604	TOMM34	0.0719403	0.155408
ENSOARG00020012241	STX16	0.0719403	0.126562
ENSOARG00020025689	FASN	0.0720873	0.170042
ENSOARG00020009332	TPP1	0.0720992	0.212413
ENSOARG00020003261	SFTPB	0.0722159	0.292726
ENSOARG00020004523	TMED8	0.0722159	0.127141
ENSOARG00020009784	PDIA5	0.0722159	0.138612
ENSOARG00020015993	RAB43	0.0722159	0.0930808
ENSOARG00020007130		0.0722714	0.180758
ENSOARG00020016405	IQCD	0.0722714	0.0665181
ENSOARG00020009031	PANK1	0.0722954	0.323326
ENSOARG00020017975	JPH2	0.0724704	0.331362
ENSOARG00020000946	PTX3	0.0725892	0.147218
ENSOARG00020020001	PARK7	0.0727069	0.239671
ENSOARG00020015957	CTSA	0.0727127	0.135408
ENSOARG00020009710	RETN	0.0729921	0.0600805
ENSOARG00020009721		0.0729962	0.278235
ENSOARG00020020966	ELN	0.0730796	0.260551
ENSOARG00020002682	ABCA1	0.0731837	0.145704
ENSOARG00020015838	LAMTOR2	0.073252	0.0928873
ENSOARG00020001043	CIB4	0.0733247	0.0799861
ENSOARG00020007104	IL10RA	0.073341	0.172205
ENSOARG00020001031	TGFBR1	0.0733775	0.198338
ENSOARG00020026315	HS3ST6	0.0733882	0.289269
ENSOARG00020003806	TP53INP1	0.0734002	0.338424
ENSOARG00020007446	KCTD8	0.0734002	0.06597
ENSOARG00020012497		0.0734002	0.138612
ENSOARG00020014812	FBXO32	0.0734002	0.27479
ENSOARG00020015433	CPE	0.0734002	0.303232
ENSOARG00020016134	RPL19	0.0734002	0.136074
ENSOARG00020020218	PPP1R9A	0.0734002	0.147697
ENSOARG00020021249	rpl23a	0.0734002	0.194395
ENSOARG00020022523	KASH5	0.0734002	0.121835
ENSOARG00020025085	CIDEC	0.0734002	0.170042
ENSOARG00020011771	TXNL4A	0.0734544	0.0647313
ENSOARG00020012256	MYOM3	0.073549	0.214647
ENSOARG00020024584	ABCD1	0.0735813	0.0975882
ENSOARG00020002041	COL24A1	0.0737394	0.212042
ENSOARG00020004233	MRPL33	0.0737394	0.0780713
ENSOARG00020010015	ELMOD1	0.0737394	0.0928873
ENSOARG00020020838	THAP3	0.0737394	0.150789
ENSOARG00020005761		0.0737639	0.0580288
ENSOARG00020005923	TAGAP	0.0737639	0.33541
ENSOARG00020017672	TRAK2	0.0738113	0.0937969
ENSOARG00020000823		0.0738675	0.229574
ENSOARG00020004451	SERINC5	0.0738675	0.119775
ENSOARG00020008589	SMAD3	0.0738675	0.160295
ENSOARG00020018459	MRPL55	0.0738675	0.0874621
ENSOARG00020024259	MATN2	0.0738675	0.0840534
ENSOARG00020004744	NXT1	0.0739404	0.160293
ENSOARG00020008713		0.0739404	0.200292
ENSOARG00020026118	RRNAD1	0.074009	0.0675954
ENSOARG00020021695	RPL26	0.0740114	0.278203
ENSOARG00020021749	PYROXD2	0.0740114	0.147789
ENSOARG00020003481	COQ9	0.0740476	0.155632
ENSOARG00020025945	SLC39A11	0.0740556	0.0512747
ENSOARG00020009241		0.0741244	0.0605816
ENSOARG00020010897	SNAI1	0.0743488	0.0905459
ENSOARG00020000902	S100A14	0.0743678	0.0626322
ENSOARG00020024411		0.0744803	0.184484
ENSOARG00020006588	FCGR1A	0.0745105	0.356919
ENSOARG00020012587		0.0745105	0.0780713
ENSOARG00020021319	PRR15L	0.0745105	0.215623
ENSOARG00020022043	Metazoa_SRP	0.0745105	0.402054
ENSOARG00020011521	PLOD1	0.0745676	0.156338
ENSOARG00020000536	CYCS	0.0746489	0.139428
ENSOARG00020000745	CLEC12A	0.0746489	0.111453
ENSOARG00020003516	EIF2B3	0.0746489	0.421019
ENSOARG00020004282	EMC7	0.0746489	0.107575
ENSOARG00020006921	HIST2H2AB	0.0746489	0.595143
ENSOARG00020012255		0.0746489	0.0651116
ENSOARG00020013345	TECPR2	0.0746489	0.109538
ENSOARG00020015682	FAM174C	0.0746489	0.137855
ENSOARG00020018307		0.0746489	0.0630733
ENSOARG00020001774	ARL4A	0.0746661	0.0972162
ENSOARG00020016489	RACK1	0.0746661	0.121217
ENSOARG00020025738	SCG3	0.0746661	0.204199
ENSOARG00020011878	SEC23A	0.074894	0.174418
ENSOARG00020024632		0.0749222	0.147912
ENSOARG00020026247	C16orf91	0.0749222	0.199514
ENSOARG00020024488		0.075106	0.182488
ENSOARG00020022711	PIH1D1	0.0751671	0.13977
ENSOARG00020023825	CYP1A1	0.0751671	0.320226
ENSOARG00020025272		0.0751671	0.171323
ENSOARG00020008993	NEDD8	0.075333	0.10904
ENSOARG00020016982	C1QB	0.0753338	0.0973983
ENSOARG00020024738	PLOD3	0.0754345	0.137286
ENSOARG00020020918	ZKSCAN1	0.0754483	0.141508
ENSOARG00020012326	BABAM1	0.0754607	0.0554848
ENSOARG00020012423	KIF7	0.0754607	0.0612923
ENSOARG00020012556	PLXNC1	0.0754607	0.227541
ENSOARG00020015899		0.0755585	0.0675324
ENSOARG00020007543		0.0755896	0.166365
ENSOARG00020026297	CDHR1	0.0756056	0.162624
ENSOARG00020025956	RRP9	0.0757792	0.202171
ENSOARG00020020799	CSKMT	0.0758745	0.138548
ENSOARG00020004289	ABCC8	0.075883	0.230244
ENSOARG00020010315	NCOR1	0.075883	0.227998
ENSOARG00020019313	IL18	0.075883	0.17454
ENSOARG00020010167	PLPP2	0.0758985	0.091869
ENSOARG00020014667	PPP1R14A	0.0758985	0.195932
ENSOARG00020020383	PAFAH1B3	0.0758985	0.16527
ENSOARG00020024260	MRPS12	0.0758985	0.101251
ENSOARG00020011055	GLRX	0.0760232	0.0651577
ENSOARG00020024938		0.0760232	0.12156
ENSOARG00020003492		0.0760672	0.252071
ENSOARG00020006281	OSGIN1	0.0762671	0.0975685
ENSOARG00020002040		0.07648	0.113269
ENSOARG00020015094	ITGAV	0.0768131	0.142848
ENSOARG00020021774	FGL1	0.0768131	0.147749
ENSOARG00020001172	KCNAB1	0.0771091	0.130244
ENSOARG00020007852	CIART	0.0771091	0.231199
ENSOARG00020021818	MPV17L	0.0771091	0.302315
ENSOARG00020001796	MAP3K20	0.0771355	0.501256
ENSOARG00020014642	TRIM56	0.0773014	0.382772
ENSOARG00020004557	CCL27	0.0773231	0.0594289
ENSOARG00020011537	SLC7A5	0.0773231	0.234628
ENSOARG00020016566	IL18BP	0.0773231	0.133474
ENSOARG00020025852	ALAS1	0.0773231	0.131971
ENSOARG00020002606	KCNMB4	0.0774389	0.0562306
ENSOARG00020003931	ATP2B4	0.0774566	0.20513
ENSOARG00020012258	RPS6KB2	0.0774566	0.0815137
ENSOARG00020000142		0.0775002	0.133474
ENSOARG00020009639	MAP3K1	0.0777272	0.155408
ENSOARG00020025452	ZNF280B	0.0779182	0.133965
ENSOARG00020008902	FBXO36	0.078094	0.104055
ENSOARG00020024333	TNKS	0.078094	0.168181
ENSOARG00020009205	RPS11	0.0782315	0.145502
ENSOARG00020000189	AKR1A1	0.0786367	0.0750955
ENSOARG00020022909	NOL7	0.0789353	0.0516787
ENSOARG00020018876	SLC28A1	0.0789501	0.16184
ENSOARG00020020567	PCDH7	0.0789607	0.13971
ENSOARG00020021943	HOXB3	0.0789883	0.208583
ENSOARG00020025486	TNS1	0.0790015	0.0928873
ENSOARG00020019578	GTF2H4	0.0790348	0.100624
ENSOARG00020012376	NPAS2	0.0791929	0.319554
ENSOARG00020014854		0.0791929	0.172894
ENSOARG00020025439	IGFBP5	0.0791929	0.0926829
ENSOARG00020005608		0.0792224	0.114598
ENSOARG00020021974	TSGA10IP	0.0792224	0.0919985
ENSOARG00020012037	ANKRD49	0.0792586	0.411016
ENSOARG00020016103	ZNHIT2	0.079338	0.142149
ENSOARG00020001312	ASPN	0.0795778	0.137766
ENSOARG00020002010		0.0795778	0.105478
ENSOARG00020002827	RCSD1	0.0795778	0.147442
ENSOARG00020004315		0.0795778	0.141064
ENSOARG00020009009	SQOR	0.0795778	0.267717
ENSOARG00020017275		0.0795778	0.0922614
ENSOARG00020020864	ADGRL3	0.0795778	0.0692577
ENSOARG00020009981	C2	0.0797326	0.352099
ENSOARG00020000438	NLGN1	0.0797987	0.101933
ENSOARG00020016018	LMNA	0.0798226	0.299106
ENSOARG00020004883	HINT2	0.0799077	0.0622996
ENSOARG00020008811	NCOA2	0.0799077	0.115507
ENSOARG00020009101		0.0800432	0.0693649
ENSOARG00020021436		0.0802209	0.369901
ENSOARG00020003988		0.0802868	0.0911729
ENSOARG00020010128		0.0803094	0.206034
ENSOARG00020002904		0.0803472	0.268119
ENSOARG00020006331	H1-4	0.0803472	0.411974
ENSOARG00020008063	UBN1	0.0803472	0.105055
ENSOARG00020021858		0.0803472	0.136713
ENSOARG00020026385		0.0803472	0.395922
ENSOARG00020005466	CPT2	0.0804826	0.438351
ENSOARG00020003294	SLC38A4	0.0804978	0.12702
ENSOARG00020002552	TTC27	0.0805317	0.0547828
ENSOARG00020004269	REX1BD	0.0805879	0.208624
ENSOARG00020008753	IDI1	0.0805879	0.132509
ENSOARG00020017568	FOLR2	0.0805879	0.647633
ENSOARG00020023563	ZNF32	0.0805879	0.151829
ENSOARG00020024929		0.0805879	0.178469
ENSOARG00020025476		0.0805879	0.0928873
ENSOARG00020007484		0.0805975	0.112253
ENSOARG00020024718	ZNHIT1	0.0808692	0.159479
ENSOARG00020000572	RALA	0.0810636	0.170242
ENSOARG00020003394		0.0810636	0.134089
ENSOARG00020014823	ZNF622	0.0811658	0.207184
ENSOARG00020022671	GNL1	0.0811808	0.207284
ENSOARG00020024861	ATP2B3	0.0812271	0.122354
ENSOARG00020023106	EP400	0.0812484	0.455792
[truncated: 15,363 more rows]

## Sheet: Study 1
Supplementary File S2: Results of the differential expression analysis per study along with meta-analysis.
ID	baseMean	log2FoldChange	lfcSE	stat	pvalue	padj	weight
ENSOARG00020004687	555.668	7.31069	0.879833	8.30918	9.64e-17	2.29e-12	0.620826
ENSOARG00020025771	5621.54	-5.06843	0.628869	-8.0596	7.65e-16	3.61e-12	1.56456
ENSOARG00020012267	394.977	-6.76187	0.882177	-7.66498	1.79e-14	5.68e-11	1.54722
ENSOARG00020023615	970.584	-6.97903	0.924743	-7.547	4.45e-14	1.63e-10	1.00764
ENSOARG00020023857	72342.9	4.07229	0.576102	7.06869	1.56e-12	5.48e-09	0.841578
ENSOARG00020025090	86.7663	-6.52487	0.960479	-6.79336	1.1e-11	2.56e-08	1.05065
ENSOARG00020003145	98.7211	4.99866	0.73966	6.75805	1.4e-11	2.74e-08	1.07549
ENSOARG00020024147	4188.28	-4.6268	0.706936	-6.54486	5.96e-11	6.21e-08	1.76929
ENSOARG00020008739	167.375	4.26491	0.667267	6.39162	1.64e-10	2.06e-07	1.3073
ENSOARG00020018778	686.228	4.11199	0.650106	6.3251	2.53e-10	2.97e-07	1.25818
ENSOARG00020017332	678.617	3.71792	0.582087	6.38724	1.69e-10	3.65e-07	0.620826
ENSOARG00020000264	5482.96	-3.12657	0.503794	-6.20604	5.43e-10	7.93e-07	0.841578
ENSOARG00020023398	600.86	3.76956	0.617815	6.10144	1.05e-09	7.93e-07	1.50327
ENSOARG00020001942	111.117	3.75737	0.617232	6.08745	1.15e-09	1.12e-06	1.07549
ENSOARG00020023664	1086.86	-4.78131	0.796867	-6.00013	1.97e-09	1.4e-06	1.38744
ENSOARG00020022135	124.843	4.38081	0.734606	5.96349	2.47e-09	1.5e-06	1.51551
ENSOARG00020000776	2280.28	4.86677	0.819575	5.93816	2.88e-09	1.61e-06	1.54903
ENSOARG00020014126	1342.38	3.3927	0.569495	5.95738	2.56e-09	2.59e-06	0.811298
ENSOARG00020025919	56.8583	6.65203	1.14428	5.81328	6.13e-09	3.53e-06	1.34552
ENSOARG00020013288	218.22	4.20774	0.724566	5.80725	6.35e-09	3.72e-06	1.25818
ENSOARG00020000917	211.959	-5.55541	0.973323	-5.70767	1.15e-08	5.8e-06	1.32479
ENSOARG00020017417	43.2261	6.26342	1.09095	5.74126	9.4e-09	5.8e-06	1.11766
ENSOARG00020009173	1239.97	3.86769	0.674885	5.7309	9.99e-09	6.36e-06	1.00764
ENSOARG00020007739	445.089	2.81535	0.498498	5.64767	1.63e-08	6.46e-06	1.54722
ENSOARG00020012432	136878	3.58289	0.640391	5.59485	2.21e-08	8.33e-06	1.56456
ENSOARG00020002093	1201.01	3.17836	0.572454	5.55217	2.82e-08	1.19e-05	1.34536
ENSOARG00020011766	57.263	-4.18623	0.752375	-5.56402	2.64e-08	1.26e-05	1.14286
ENSOARG00020015171	306.493	3.24304	0.587355	5.52143	3.36e-08	1.34e-05	1.32479
ENSOARG00020026371	15101.6	-3.98445	0.728185	-5.47176	4.46e-08	1.45e-05	1.56456
ENSOARG00020005412	50.0806	6.41855	1.16506	5.50922	3.6e-08	1.57e-05	1.0365
ENSOARG00020012910	166.331	3.49529	0.635373	5.50116	3.77e-08	1.57e-05	1.14286
ENSOARG00020012955	74.1463	-6.06726	1.10193	-5.50602	3.67e-08	1.57e-05	1.14286
ENSOARG00020018836	174.864	3.95809	0.710157	5.57353	2.5e-08	1.57e-05	0.710965
ENSOARG00020018704	2560.19	-3.47052	0.640354	-5.41968	5.97e-08	2.06e-05	1.25874
ENSOARG00020015168	913.173	-5.14815	0.96081	-5.35813	8.41e-08	2.63e-05	1.34778
ENSOARG00020023464	1844.28	-3.61016	0.680155	-5.30785	1.11e-07	3.28e-05	1.38744
ENSOARG00020023177	888.123	3.20147	0.606862	5.27545	1.32e-07	3.92e-05	1.34778
ENSOARG00020012287	338.684	-3.96032	0.756642	-5.23408	1.66e-07	4.86e-05	1.32479
ENSOARG00020025972	984.251	3.66478	0.704414	5.20259	1.97e-07	5.36e-05	1.38744
ENSOARG00020000811	96.6494	4.22205	0.806998	5.2318	1.68e-07	5.41e-05	1.07549
ENSOARG00020000908	1756.82	-3.10261	0.591498	-5.24534	1.56e-07	5.41e-05	1.00764
ENSOARG00020017476	98.5223	3.12555	0.597153	5.23408	1.66e-07	5.41e-05	1.05065
ENSOARG00020024949	354.079	3.40948	0.654015	5.21316	1.86e-07	5.41e-05	1.25818
ENSOARG00020006230	225.673	2.77858	0.526355	5.27891	1.3e-07	5.99e-05	0.710965
ENSOARG00020023194	98.803	4.84276	0.930793	5.20284	1.96e-07	5.99e-05	1.07549
ENSOARG00020018609	698.477	2.51417	0.477455	5.26577	1.4e-07	7.21e-05	0.620826
ENSOARG00020016816	574.15	-2.9014	0.570289	-5.08759	3.63e-07	8.46e-05	1.34536
ENSOARG00020000543	53.0129	5.07292	0.981313	5.16953	2.35e-07	9.98e-05	0.722675
ENSOARG00020014613	228.364	-3.67865	0.738172	-4.98345	6.25e-07	0.000164523	1.14286
ENSOARG00020002625	29.3752	7.24988	1.4803	4.89758	9.7e-07	0.000212738	1.34552
ENSOARG00020019809	103.31	3.36949	0.69566	4.84358	1.28e-06	0.000243372	1.51551
ENSOARG00020017800	30.2181	4.76507	0.958666	4.97052	6.68e-07	0.000262109	0.722675
ENSOARG00020001556	98.0324	4.45502	0.915515	4.86614	1.14e-06	0.000277139	1.14286
ENSOARG00020017534	41.7479	-6.01321	1.26137	-4.76719	1.87e-06	0.000379271	1.34552
ENSOARG00020000075	36.8839	4.25239	0.896979	4.7408	2.13e-06	0.000424333	1.34552
ENSOARG00020013245	80.5621	3.55953	0.756252	4.70681	2.52e-06	0.000437356	1.51551
ENSOARG00020017943	50.7287	-4.6305	0.977709	-4.73607	2.18e-06	0.000493429	1.14286
ENSOARG00020005649	23719	-2.49408	0.534027	-4.67032	3.01e-06	0.000493744	1.54903
ENSOARG00020004920	40.563	-5.53635	1.16968	-4.73323	2.21e-06	0.000494306	1.11766
ENSOARG00020023760	707.375	3.72191	0.794138	4.68673	2.78e-06	0.000506377	1.34778
ENSOARG00020007012	55.557	4.7583	1.01107	4.70622	2.52e-06	0.000533959	1.14286
ENSOARG00020021643	79.1597	3.4602	0.745811	4.63951	3.49e-06	0.000548269	1.51551
ENSOARG00020012335	24794.5	-2.33581	0.496387	-4.70563	2.53e-06	0.000704138	0.841578
ENSOARG00020002992	459.911	2.81345	0.602247	4.67159	2.99e-06	0.000860934	0.800144
ENSOARG00020020334	28.9898	-4.08514	0.887436	-4.60331	4.16e-06	0.00101389	0.930765
ENSOARG00020012015	175.561	2.68295	0.592578	4.52759	5.97e-06	0.00101995	1.3073
ENSOARG00020005683	85.9821	2.93063	0.64805	4.52223	6.12e-06	0.00125267	1.07549
ENSOARG00020012075	1426.52	2.80814	0.62089	4.52277	6.1e-06	0.00128796	1.00764
ENSOARG00020019476	1821.09	2.46817	0.553488	4.4593	8.22e-06	0.00128796	1.34536
ENSOARG00020024249	87.9639	2.80769	0.622234	4.51228	6.41e-06	0.00128796	1.05065
ENSOARG00020016620	737.25	2.52195	0.565985	4.45587	8.36e-06	0.00136055	1.25818
ENSOARG00020023653	85.4512	2.90269	0.64841	4.47663	7.58e-06	0.00136055	1.14286
ENSOARG00020011341	35.9804	-5.00946	1.11645	-4.48697	7.22e-06	0.00138821	1.0365
ENSOARG00020021074	70.0697	3.38461	0.76431	4.42832	9.5e-06	0.00138821	1.34552
ENSOARG00020021792	264.174	2.95434	0.665966	4.43618	9.16e-06	0.00138821	1.32479
ENSOARG00020011081	72.8012	-5.20168	1.18302	-4.39696	1.1e-05	0.00140595	1.51551
ENSOARG00020001083	233.705	2.83124	0.639929	4.4243	9.68e-06	0.00141785	1.3073
ENSOARG00020023831	170.466	2.6462	0.582282	4.54453	5.51e-06	0.00146452	0.710965
ENSOARG00020021349	728.268	2.49402	0.545777	4.56967	4.88e-06	0.00146919	0.620826
ENSOARG00020005613	94.5977	3.40603	0.767455	4.43808	9.08e-06	0.00155614	1.07549
ENSOARG00020026375	279.647	-2.80025	0.642935	-4.35541	1.33e-05	0.00156331	1.54722
ENSOARG00020015079	331.515	2.87988	0.650698	4.42583	9.61e-06	0.00161979	1.06694
ENSOARG00020002421	4983.53	2.15899	0.49303	4.37903	1.19e-05	0.00165195	1.25874
ENSOARG00020003235	656.642	-2.40179	0.548602	-4.37801	1.2e-05	0.00165195	1.25818
ENSOARG00020022886	543.611	2.84039	0.650922	4.36365	1.28e-05	0.00165195	1.34778
ENSOARG00020005882	106.393	3.3382	0.757115	4.4091	1.04e-05	0.00165547	1.07549
ENSOARG00020001251	250.594	-3.47314	0.797452	-4.3553	1.33e-05	0.00170496	1.3073
ENSOARG00020005618	64.7093	-3.3247	0.766641	-4.33671	1.45e-05	0.00170496	1.34552
ENSOARG00020005892	165.293	2.68331	0.61313	4.37641	1.21e-05	0.00170496	1.14286
ENSOARG00020009778	720.736	2.199	0.506373	4.34265	1.41e-05	0.00170496	1.34536
ENSOARG00020011530	1660.11	2.14465	0.487219	4.40183	1.07e-05	0.00170496	1.00764
ENSOARG00020018333	167.481	2.42976	0.55872	4.34881	1.37e-05	0.00170496	1.32479
ENSOARG00020018770	164.364	2.55529	0.587793	4.34727	1.38e-05	0.00170496	1.3073
ENSOARG00020009041	498.704	-3.2196	0.744642	-4.32369	1.53e-05	0.00191377	1.25818
ENSOARG00020001060	17716.9	2.57641	0.608783	4.23207	2.32e-05	0.0020109	1.76929
ENSOARG00020023319	26457	2.9113	0.683074	4.26206	2.03e-05	0.0020109	1.54903
ENSOARG00020011427	2994.77	-2.98845	0.684406	-4.36649	1.26e-05	0.00225818	0.841578
ENSOARG00020024603	2332.59	-1.94914	0.460858	-4.22937	2.34e-05	0.00225818	1.56456
ENSOARG00020001952	98.6078	3.03219	0.706035	4.29467	1.75e-05	0.00228097	1.14286
ENSOARG00020002845	333.116	2.53464	0.59997	4.22462	2.39e-05	0.00228193	1.54722
ENSOARG00020019073	56.434	3.07551	0.723131	4.25305	2.11e-05	0.00228899	1.34552
ENSOARG00020007916	1574.35	2.60732	0.613578	4.24937	2.14e-05	0.00230438	1.34536
ENSOARG00020005712	2332.85	3.04167	0.721599	4.21518	2.5e-05	0.00230742	1.54903
ENSOARG00020009028	74.4173	2.63044	0.615171	4.27595	1.9e-05	0.002362	1.14286
ENSOARG00020008140	70.5529	4.33834	1.01804	4.26147	2.03e-05	0.00255267	1.11766
ENSOARG00020023792	8814.19	3.0134	0.723034	4.16772	3.08e-05	0.00276392	1.54903
ENSOARG00020002603	43.6144	2.90568	0.693246	4.19141	2.77e-05	0.00281408	1.34552
ENSOARG00020024278	121.748	2.37821	0.559807	4.24827	2.15e-05	0.00281408	1.05065
ENSOARG00020016546	80.2892	2.64472	0.627494	4.21474	2.5e-05	0.00296111	1.14286
ENSOARG00020004699	3138.56	3.15124	0.752309	4.18876	2.8e-05	0.00298813	1.25874
ENSOARG00020000874	128.519	-3.04962	0.72427	-4.21061	2.55e-05	0.00311891	1.07549
ENSOARG00020023949	709.799	2.90096	0.697273	4.16044	3.18e-05	0.00311891	1.34536
ENSOARG00020004948	4196.7	-2.462	0.578467	-4.25607	2.08e-05	0.00322718	0.841578
ENSOARG00020000952	228.668	-2.20891	0.532201	-4.15052	3.32e-05	0.00324003	1.32479
ENSOARG00020003806	117.767	3.28605	0.788013	4.17004	3.05e-05	0.00341809	1.14286
ENSOARG00020006234	139.205	3.40526	0.819614	4.15471	3.26e-05	0.00360622	1.14286
ENSOARG00020026408	93.0252	-3.49407	0.837289	-4.17307	3.01e-05	0.00360622	1.05065
ENSOARG00020002892	100.715	2.8241	0.681424	4.14442	3.41e-05	0.00363864	1.17044
ENSOARG00020014591	49744.5	-1.79291	0.443387	-4.04366	5.26e-05	0.0036869	1.76929
ENSOARG00020009295	494.916	2.19492	0.538069	4.07926	4.52e-05	0.00369445	1.50327
ENSOARG00020017989	36.2606	3.82817	0.902657	4.241	2.23e-05	0.00375384	0.722675
ENSOARG00020000887	622.802	2.85137	0.697635	4.0872	4.37e-05	0.00419584	1.25818
ENSOARG00020020146	4555.03	-2.26946	0.545584	-4.1597	3.19e-05	0.00454107	0.841578
ENSOARG00020004039	146.45	2.75916	0.682292	4.04396	5.26e-05	0.0047441	1.3073
ENSOARG00020020532	73.6335	3.72025	0.909399	4.09089	4.3e-05	0.0047441	1.07549
ENSOARG00020013434	34.3962	-3.9528	0.982016	-4.02519	5.69e-05	0.00492727	1.34552
ENSOARG00020017226	199.54	2.5171	0.624381	4.03135	5.55e-05	0.00492727	1.3073
ENSOARG00020001247	571.606	2.71058	0.674482	4.01876	5.85e-05	0.0049836	1.34778
ENSOARG00020001440	781.427	-1.8337	0.459452	-3.99107	6.58e-05	0.0049836	1.50327
ENSOARG00020022502	35.0738	3.28951	0.806747	4.0775	4.55e-05	0.0049836	1.0365
ENSOARG00020013838	150.981	2.85083	0.707399	4.03002	5.58e-05	0.00498923	1.25818
ENSOARG00020021544	37.5633	-5.87302	1.41285	-4.15686	3.23e-05	0.00498923	0.722675
ENSOARG00020002823	2249.3	2.00326	0.498051	4.02219	5.77e-05	0.00504246	1.25874
ENSOARG00020008805	288.329	2.6192	0.634325	4.1291	3.64e-05	0.00504246	0.800144
ENSOARG00020011816	59594.4	-1.8445	0.464801	-3.96836	7.24e-05	0.00510483	1.54903
ENSOARG00020017062	105.594	2.97479	0.734394	4.05068	5.11e-05	0.00527216	1.05065
ENSOARG00020017433	60.9023	2.63322	0.64998	4.05124	5.09e-05	0.0052924	1.0365
ENSOARG00020004500	106.784	2.3125	0.572435	4.03977	5.35e-05	0.00544342	1.05065
ENSOARG00020001586	1061.57	2.41641	0.59746	4.04446	5.24e-05	0.00552314	1.00764
ENSOARG00020010899	1229.28	3.57588	0.900248	3.9721	7.12e-05	0.00556934	1.34778
ENSOARG00020003850	182.803	2.45118	0.596091	4.11209	3.92e-05	0.00576962	0.710965
ENSOARG00020023417	44.2133	3.98491	0.991784	4.01792	5.87e-05	0.00588435	1.0365
ENSOARG00020001473	1444.04	-1.95234	0.496733	-3.93037	8.48e-05	0.00649152	1.34778
ENSOARG00020005609	44.7324	4.14763	1.04581	3.96595	7.31e-05	0.00664971	1.11766
ENSOARG00020017100	2398.55	2.95327	0.760377	3.88396	0.00010277	0.00664971	1.56456
ENSOARG00020026372	86479.5	-1.99496	0.513385	-3.8859	0.000101951	0.00664971	1.54903
ENSOARG00020020523	192.451	-2.0417	0.519003	-3.93388	8.36e-05	0.00666628	1.25818
ENSOARG00020021632	30.3146	-3.31346	0.848867	-3.90339	9.49e-05	0.00702635	1.34552
ENSOARG00020019241	11.751	6.89852	1.68376	4.09709	4.18e-05	0.00718934	0.576109
ENSOARG00020002407	74.1448	3.18768	0.825264	3.86262	0.00011218	0.0072056	1.51551
ENSOARG00020008643	3667.52	-2.08099	0.532635	-3.90697	9.35e-05	0.0072056	1.25874
ENSOARG00020022698	1357.56	2.09493	0.53924	3.88496	0.000102346	0.0072056	1.38744
ENSOARG00020012976	43.0933	-3.21484	0.798299	-4.02712	5.65e-05	0.00749604	0.722675
ENSOARG00020024549	65.1705	3.72914	0.951898	3.91759	8.94e-05	0.00749604	1.14286
ENSOARG00020017590	135.22	2.69666	0.689033	3.91369	9.09e-05	0.007569	1.14286
ENSOARG00020002756	20120.6	-1.90867	0.498581	-3.8282	0.000129081	0.00780132	1.56456
ENSOARG00020011920	12245.2	-6.27179	1.5798	-3.96999	7.19e-05	0.00797843	0.841578
ENSOARG00020024296	1677.23	-2.02299	0.525579	-3.84907	0.000118568	0.00797843	1.38744
ENSOARG00020006701	55414.5	-1.8172	0.475936	-3.81816	0.00013445	0.00805239	1.54903
ENSOARG00020024320	15.3748	6.30552	1.55668	4.05063	5.11e-05	0.00809113	0.582037
ENSOARG00020013425	112.164	-2.31647	0.597429	-3.87739	0.000105582	0.00826487	1.17044
ENSOARG00020026042	92.1614	2.61266	0.674797	3.87178	0.000108045	0.00840549	1.17044
ENSOARG00020003681	216.479	2.865	0.739169	3.87597	0.000106201	0.00840944	1.14286
ENSOARG00020008515	58.4813	3.68207	0.950483	3.87389	0.000107111	0.0084298	1.14286
ENSOARG00020017425	108.8	2.73836	0.703706	3.89135	9.97e-05	0.00848259	1.05065
ENSOARG00020023151	29.0336	3.15138	0.813392	3.87437	0.000106901	0.00849935	1.11766
ENSOARG00020000787	41.8536	3.55072	0.918117	3.8674	0.000110003	0.00869362	1.11766
ENSOARG00020007710	15247.1	-2.70815	0.721913	-3.75135	0.000175882	0.00872839	1.76929
ENSOARG00020007711	1961.37	1.98246	0.503867	3.93448	8.34e-05	0.00897006	0.811298
ENSOARG00020022954	481.377	-2.00514	0.530794	-3.77763	0.00015833	0.00913899	1.50327
ENSOARG00020001796	200.656	2.86504	0.753762	3.80099	0.000144121	0.0093382	1.32479
ENSOARG00020019416	535.852	2.08214	0.545987	3.81353	0.000136998	0.0093382	1.25818
ENSOARG00020008663	513.675	2.66148	0.701562	3.79365	0.000148449	0.00939148	1.34778
ENSOARG00020021475	285.825	-2.34633	0.616124	-3.80821	0.000139976	0.00943151	1.25818
ENSOARG00020009415	755.865	-1.84588	0.487548	-3.78605	0.000153061	0.00957259	1.34778
ENSOARG00020018740	419.635	-1.78916	0.477572	-3.74637	0.000179415	0.00971885	1.54722
ENSOARG00020025785	34998.6	-1.66931	0.446104	-3.74196	0.000182587	0.00972582	1.56456
ENSOARG00020007594	1071.77	-1.79359	0.476455	-3.76445	0.000166915	0.0101639	1.34778
ENSOARG00020015731	3863.31	-1.96933	0.507536	-3.88018	0.000104378	0.0101639	0.841578
ENSOARG00020018833	85.4543	2.50832	0.656245	3.82223	0.000132253	0.0101639	1.07549
ENSOARG00020003773	29.5512	4.86172	1.27876	3.80191	0.000143588	0.0104125	1.11766
ENSOARG00020012370	17.9066	6.5258	1.69599	3.84779	0.000119188	0.0104125	0.930765
ENSOARG00020005584	226.468	2.5962	0.69107	3.75678	0.000172114	0.0105547	1.3073
ENSOARG00020020282	121.011	2.73448	0.718449	3.80608	0.000141185	0.0105547	1.07549
ENSOARG00020011102	139.485	2.74303	0.723464	3.79152	0.00014973	0.0110411	1.07549
ENSOARG00020026397	2483.51	-2.06257	0.557802	-3.69767	0.000217589	0.0110411	1.56456
ENSOARG00020005313	41.3717	4.04254	1.04266	3.87714	0.000105693	0.0115368	0.722675
ENSOARG00020008005	171.367	3.07232	0.818707	3.75265	0.000174973	0.0117625	1.14286
ENSOARG00020008632	4375	-1.8432	0.505954	-3.64302	0.000269455	0.0117625	1.76929
ENSOARG00020013105	28476.9	-1.65543	0.450229	-3.67686	0.000236118	0.0117625	1.56456
ENSOARG00020022050	20529.7	-1.7787	0.488352	-3.64225	0.00027027	0.0117625	1.76929
ENSOARG00020024795	157.14	3.49943	0.904138	3.87046	0.000108632	0.0117625	0.710965
ENSOARG00020006139	187.272	2.59751	0.696948	3.72697	0.000193793	0.0117722	1.25818
ENSOARG00020015342	60.9101	2.60418	0.70265	3.70623	0.000210365	0.0118269	1.34552
ENSOARG00020022975	120.746	2.22235	0.604554	3.67601	0.000236906	0.0118269	1.51551
ENSOARG00020008789	12758.1	2.22134	0.606179	3.66449	0.00024783	0.0119214	1.56456
ENSOARG00020010758	89.5765	-3.32686	0.88919	-3.74145	0.000182964	0.0119875	1.14286
ENSOARG00020003805	23.3261	4.5007	1.18762	3.78967	0.000150847	0.012074	0.930765
ENSOARG00020010293	74.0872	3.54371	0.949225	3.73327	0.000189011	0.0122592	1.14286
ENSOARG00020008440	499.903	-1.81478	0.491974	-3.68877	0.000225337	0.0122725	1.34778
ENSOARG00020012376	57.2868	2.48062	0.66496	3.73048	0.000191117	0.0122725	1.14286
ENSOARG00020001785	129.851	2.79376	0.745115	3.74943	0.000177235	0.0123186	1.05065
ENSOARG00020006030	230.085	2.0353	0.552445	3.68417	0.000229452	0.0125855	1.32479
ENSOARG00020022250	151.455	2.76159	0.747882	3.69254	0.000222023	0.0127599	1.25818
ENSOARG00020004412	27924.6	2.69735	0.731915	3.68533	0.000228405	0.0129934	1.25874
ENSOARG00020026005	8380.96	-1.6915	0.446565	-3.7878	0.000151987	0.0129934	0.841578
ENSOARG00020019738	64.3152	2.6458	0.713856	3.70635	0.00021027	0.0131109	1.14286
ENSOARG00020007597	1074.12	2.49377	0.682518	3.65378	0.000258413	0.0131454	1.38744
ENSOARG00020025880	171.674	2.88163	0.778127	3.70329	0.000212819	0.0131454	1.14286
ENSOARG00020007062	26.7872	3.98299	1.06217	3.74985	0.000176943	0.0133535	0.930765
ENSOARG00020006413	3954.07	1.90686	0.527377	3.61574	0.000299493	0.0133633	1.56456
ENSOARG00020021096	727.224	-1.97587	0.538243	-3.67096	0.000241641	0.0133633	1.25818
ENSOARG00020017849	14.9944	5.41963	1.44741	3.74436	0.000180853	0.0133935	0.930765
ENSOARG00020024899	44.0002	3.55518	0.973704	3.65119	0.000261029	0.0133935	1.34552
ENSOARG00020015618	440.148	2.43237	0.663643	3.66517	0.000247171	0.0134784	1.25818
ENSOARG00020022148	86.2657	2.67751	0.727157	3.68216	0.000231266	0.0134937	1.17044
ENSOARG00020001031	51.5243	3.60781	0.990695	3.64169	0.000270851	0.0136837	1.34552
ENSOARG00020007993	17598.7	-1.71539	0.476972	-3.59642	0.000322623	0.0139648	1.54903
ENSOARG00020009639	281.662	2.67725	0.736063	3.63725	0.00027556	0.0139648	1.32479
ENSOARG00020011684	68.2709	2.6201	0.71269	3.67635	0.000236599	0.0139648	1.14286
ENSOARG00020000314	994.259	2.46316	0.678736	3.62904	0.00028448	0.0140475	1.34778
ENSOARG00020001363	288.777	2.65204	0.73001	3.63288	0.000280274	0.0140475	1.32479
ENSOARG00020025015	25164.6	-2.10145	0.560784	-3.74734	0.000178721	0.0140475	0.841578
ENSOARG00020018231	219.376	1.98888	0.546927	3.63646	0.00027641	0.0144672	1.25818
ENSOARG00020008317	232.041	2.21168	0.610139	3.62488	0.000289091	0.0144761	1.3073
ENSOARG00020014390	401.328	-1.98145	0.545252	-3.63401	0.00027905	0.0144761	1.25818
ENSOARG00020009877	15039	-2.01317	0.562843	-3.57678	0.000347848	0.0145924	1.54903
ENSOARG00020014144	963.087	2.75398	0.747419	3.68465	0.000229019	0.0147045	1.00764
ENSOARG00020016268	814.703	2.56239	0.7084	3.61715	0.000297863	0.0152497	1.25818
ENSOARG00020005690	227.923	2.31611	0.64329	3.60041	0.000317716	0.0155868	1.3073
ENSOARG00020009994	753.665	2.16518	0.603205	3.58946	0.00033136	0.0155929	1.34536
ENSOARG00020013978	396.339	2.124	0.590962	3.59413	0.000325472	0.0155929	1.32479
ENSOARG00020024164	329.648	-2.60707	0.733523	-3.55418	0.000379165	0.0155929	1.54722
ENSOARG00020024929	793.875	1.67002	0.463237	3.60511	0.000312016	0.0156329	1.25818
ENSOARG00020019113	119.579	3.25563	0.893332	3.64436	0.000268054	0.0156448	1.07549
ENSOARG00020013089	640.96	2.03963	0.539742	3.77889	0.000157528	0.0158598	0.620826
ENSOARG00020007209	9.44601	-6.81043	1.77918	-3.82784	0.000129274	0.0162261	0.492299
ENSOARG00020010160	30504.7	-1.83508	0.519642	-3.53144	0.000413304	0.0162261	1.56456
ENSOARG00020012967	72.049	3.31913	0.937438	3.54064	0.000399153	0.0162261	1.51551
ENSOARG00020019393	99.7059	2.23626	0.615409	3.63378	0.000279297	0.0162261	1.05065
ENSOARG00020020358	135.742	2.43765	0.689024	3.53783	0.000403429	0.0162261	1.51551
ENSOARG00020020490	213.016	2.61175	0.729611	3.57965	0.000344059	0.0162261	1.3073
ENSOARG00020001744	18.1096	5.18211	1.36973	3.78331	0.000154756	0.0162396	0.576109
ENSOARG00020015556	1085.74	1.81329	0.497855	3.6422	0.000270313	0.0162396	1.00764
ENSOARG00020015094	397.239	2.5375	0.699997	3.62502	0.00028894	0.016305	1.06694
ENSOARG00020000993	854.874	1.81403	0.482468	3.7599	0.000169981	0.0163735	0.620826
ENSOARG00020012320	45250.4	-1.63951	0.458579	-3.5752	0.000349966	0.0163735	1.25874
ENSOARG00020014737	380.208	-2.1222	0.593418	-3.57622	0.000348597	0.0163735	1.25818
ENSOARG00020019175	188.185	2.72951	0.765361	3.5663	0.000362051	0.0163735	1.3073
ENSOARG00020020967	513.965	2.17118	0.578127	3.75554	0.000172967	0.0163735	0.620826
ENSOARG00020021717	540.09	-1.79688	0.478121	-3.75822	0.000171128	0.0163735	0.620826
ENSOARG00020011391	177.349	2.16107	0.604902	3.5726	0.000353457	0.0164443	1.25818
ENSOARG00020005489	238.383	2.6976	0.755471	3.57075	0.000355958	0.0164952	1.25818
ENSOARG00020018772	504.535	2.80019	0.747637	3.74539	0.000180117	0.016849	0.620826
ENSOARG00020001816	134.161	2.13518	0.596337	3.58049	0.00034295	0.0169498	1.17044
ENSOARG00020025078	9.25696	6.55012	1.74363	3.7566	0.00017224	0.0170516	0.582037
ENSOARG00020002353	288.306	2.57467	0.735664	3.49979	0.000465623	0.0170822	1.54722
ENSOARG00020011890	348.333	1.83415	0.509977	3.59654	0.000322481	0.0170822	1.06694
ENSOARG00020015410	266.943	2.97649	0.831105	3.58136	0.00034181	0.0170822	1.14286
ENSOARG00020024750	152.984	2.13876	0.604126	3.54025	0.000399744	0.0170822	1.32479
ENSOARG00020026084	4561.06	-1.8743	0.535591	-3.49949	0.000466152	0.0170822	1.56456
ENSOARG00020025757	92.7589	2.78251	0.778243	3.57537	0.000349736	0.0172292	1.14286
ENSOARG00020003858	12.4557	6.98379	1.86514	3.74438	0.000180838	0.0173646	0.582037
ENSOARG00020013019	1036.55	1.73844	0.492908	3.52691	0.000420444	0.0173646	1.34778
ENSOARG00020016985	14998.4	-1.69641	0.464757	-3.6501	0.000262142	0.0173646	0.841578
ENSOARG00020000639	51.0185	-3.25463	0.913604	-3.5624	0.000367476	0.0178309	1.14286
ENSOARG00020024292	194.468	2.32785	0.632338	3.68134	0.000232013	0.0180291	0.710965
ENSOARG00020000740	166.229	2.57741	0.702401	3.66943	0.00024309	0.018273	0.710965
ENSOARG00020001187	79.03	3.087	0.866092	3.56429	0.000364845	0.018273	1.07549
ENSOARG00020002423	66953.1	-1.5114	0.436354	-3.46371	0.000532785	0.018273	1.54903
ENSOARG00020007831	3175	-1.66964	0.487025	-3.42824	0.000607518	0.018273	1.76929
ENSOARG00020008416	1507.25	1.7572	0.501358	3.50488	0.000456815	0.018273	1.34536
ENSOARG00020013098	105.956	2.52144	0.725536	3.47528	0.000510318	0.018273	1.51551
ENSOARG00020013348	53722.8	1.93575	0.558542	3.46572	0.000528821	0.018273	1.56456
ENSOARG00020015745	8683.77	-1.61375	0.47001	-3.43344	0.000595975	0.018273	1.76929
ENSOARG00020015902	4862.24	-1.63768	0.473225	-3.46069	0.000538798	0.018273	1.56456
ENSOARG00020018469	271.398	-2.96192	0.813923	-3.63907	0.000273628	0.018273	0.800144
ENSOARG00020024798	487.627	2.16881	0.617872	3.51012	0.000447906	0.018273	1.34536
ENSOARG00020011168	192.16	2.26423	0.645989	3.50506	0.000456505	0.0184624	1.3073
ENSOARG00020024466	228.457	1.87641	0.534153	3.51287	0.000443301	0.0185618	1.25818
ENSOARG00020006708	1824.82	2.05722	0.590351	3.48475	0.000492598	0.0186377	1.38744
ENSOARG00020019441	1050.81	-1.91927	0.552021	-3.47681	0.000507425	0.0191306	1.38744
ENSOARG00020012065	101.279	-2.74153	0.77266	-3.54817	0.000387912	0.0192133	1.05065
ENSOARG00020025796	71.8762	3.13367	0.890467	3.51913	0.000432959	0.0192133	1.17044
ENSOARG00020023823	480.538	-1.7117	0.491972	-3.47927	0.000502785	0.0193082	1.34778
ENSOARG00020009635	128.647	2.29449	0.647501	3.5436	0.0003947	0.0193761	1.05065
ENSOARG00020004819	96.3556	2.62327	0.747204	3.51078	0.000446795	0.0195519	1.17044
ENSOARG00020019629	330.768	-1.84514	0.536913	-3.43658	0.000589118	0.0195519	1.54722
ENSOARG00020006912	132.566	2.31467	0.673855	3.43497	0.000592624	0.0196601	1.51551
ENSOARG00020009587	122.095	2.6775	0.758386	3.53052	0.000414739	0.0196601	1.07549
ENSOARG00020010938	1715.11	-1.56511	0.452182	-3.46123	0.00053771	0.0196601	1.38744
ENSOARG00020013502	2469.03	1.98063	0.551389	3.59208	0.000328048	0.0196601	0.841578
ENSOARG00020019445	929.188	1.92017	0.553914	3.46656	0.000527169	0.0196601	1.34536
ENSOARG00020021892	180.545	2.24607	0.64411	3.48708	0.000488317	0.0196601	1.25818
ENSOARG00020011878	192.575	2.19196	0.631302	3.47213	0.00051634	0.0197497	1.3073
ENSOARG00020000531	22.1783	3.89407	1.04539	3.725	0.000195318	0.0197717	0.492299
ENSOARG00020016456	733.534	1.62586	0.469742	3.46117	0.000537832	0.0198551	1.34536
ENSOARG00020005629	1310.98	1.8373	0.520347	3.53092	0.000414113	0.0202075	1.00764
ENSOARG00020005785	1422.33	-1.67714	0.474985	-3.53094	0.000414083	0.0202075	1.00764
ENSOARG00020007659	241.798	2.27922	0.628993	3.6236	0.000290525	0.0202075	0.710965
ENSOARG00020009052	726.103	-1.68695	0.488847	-3.45086	0.000558793	0.0203548	1.34536
ENSOARG00020013837	293.968	2.41571	0.688704	3.50761	0.000452146	0.0206991	1.06694
ENSOARG00020014015	1895.3	2.48397	0.723004	3.43562	0.000591197	0.0207441	1.38744
ENSOARG00020002226	35.1361	2.98066	0.855168	3.48547	0.000491281	0.0208585	1.14286
ENSOARG00020004898	757.191	1.82525	0.531023	3.43723	0.000587693	0.0209627	1.34778
ENSOARG00020023291	16560.4	-1.67604	0.493018	-3.39954	0.000674991	0.0209627	1.54903
ENSOARG00020024599	305.455	2.47776	0.717013	3.45567	0.000548919	0.0209627	1.25818
ENSOARG00020005535	2534.26	1.73088	0.5098	3.39522	0.000685743	0.0209913	1.56456
ENSOARG00020018998	2405.67	-1.7715	0.521965	-3.3939	0.000689049	0.0210243	1.56456
ENSOARG00020023545	43.281	-3.92238	1.12585	-3.48392	0.000494121	0.0210369	1.11766
ENSOARG00020012995	180.767	1.90792	0.54955	3.47178	0.000517016	0.0214571	1.14286
ENSOARG00020006322	1249.39	-1.82978	0.535366	-3.41782	0.000631253	0.0215107	1.38744
ENSOARG00020014343	370.397	-1.67854	0.489983	-3.4257	0.00061321	0.0217448	1.32479
ENSOARG00020022962	194.027	-2.83323	0.788823	-3.59171	0.00032851	0.0217448	0.710965
ENSOARG00020006876	150.548	2.21186	0.643347	3.43805	0.000585929	0.0218079	1.25818
ENSOARG00020013844	6647.91	-1.84911	0.547715	-3.37603	0.000735388	0.0221611	1.54903
ENSOARG00020006201	46132.5	-1.56939	0.465741	-3.36965	0.000752632	0.0226092	1.54903
ENSOARG00020012799	30.6919	3.40185	0.986076	3.44988	0.000560836	0.0227633	1.14286
ENSOARG00020025253	343.022	1.88064	0.551755	3.40847	0.000653272	0.0228023	1.32479
ENSOARG00020021025	932.603	-1.8903	0.543191	-3.47998	0.000501448	0.0228684	1.00764
ENSOARG00020023541	2564.35	1.72823	0.505228	3.42069	0.000624622	0.0228684	1.25874
ENSOARG00020015662	106.939	-2.43395	0.702097	-3.46669	0.000526909	0.0229744	1.05065
ENSOARG00020010323	424.913	1.76325	0.524761	3.36009	0.000779158	0.0229981	1.54722
ENSOARG00020014488	9959.64	-2.03403	0.605576	-3.35884	0.000782693	0.0230043	1.54903
ENSOARG00020003778	24.4407	-3.33528	0.921898	-3.61784	0.000297067	0.0234039	0.576109
ENSOARG00020014821	59.3751	3.12581	0.910585	3.43275	0.000597492	0.0234403	1.14286
ENSOARG00020022511	56.3774	-2.36283	0.68698	-3.43945	0.000582896	0.0234403	1.11766
ENSOARG00020023953	19952.3	-1.56784	0.460153	-3.40721	0.000656308	0.0234403	1.25874
ENSOARG00020024678	189.963	2.15642	0.605546	3.56112	0.000369274	0.0234403	0.710965
ENSOARG00020010077	24.5957	3.79588	1.03934	3.6522	0.000260005	0.0236081	0.492299
ENSOARG00020000954	113.078	2.36037	0.690423	3.41873	0.000629137	0.0238825	1.17044
ENSOARG00020017207	52.6005	2.67303	0.790595	3.38103	0.00072214	0.0238825	1.34552
ENSOARG00020022402	8.32422	6.401	1.77996	3.59614	0.00032297	0.0245781	0.582037
ENSOARG00020025758	77.6595	3.13915	0.940387	3.33814	0.000843398	0.0245781	1.51551
ENSOARG00020021320	34274.1	-1.84313	0.55958	-3.29377	0.00098854	0.0246021	1.76929
ENSOARG00020008526	89.6815	2.04629	0.614421	3.33043	0.000867123	0.0251191	1.51551
ENSOARG00020020085	348.802	-2.03628	0.602423	-3.38014	0.000724478	0.0252043	1.25818
ENSOARG00020003005	87.5639	-2.06969	0.603953	-3.4269	0.000610517	0.0252106	1.05065
ENSOARG00020010233	70.0786	2.21787	0.650307	3.4105	0.00064844	0.0252106	1.11766
ENSOARG00020025515	31060.1	-1.55195	0.459289	-3.37903	0.000727413	0.0252106	1.25874
ENSOARG00020010069	52693.9	-1.51973	0.43625	-3.48361	0.000494701	0.0254282	0.841578
ENSOARG00020008195	1642.63	-1.73055	0.51601	-3.35372	0.000797329	0.0255032	1.34778
ENSOARG00020019885	33.4902	2.64124	0.77115	3.42506	0.000614664	0.0255032	1.0365
ENSOARG00020002019	63.5001	2.45607	0.723006	3.39703	0.000681216	0.0255596	1.14286
ENSOARG00020001670	30.9647	-3.80653	1.13588	-3.35117	0.000804715	0.0255715	1.34552
ENSOARG00020024228	21587.5	-1.57285	0.452392	-3.47674	0.00050755	0.0257116	0.841578
ENSOARG00020001270	174.127	2.40181	0.713434	3.36656	0.000761129	0.0257162	1.25818
ENSOARG00020002682	596.058	3.04198	0.909903	3.34319	0.000828221	0.0258715	1.34536
ENSOARG00020005843	10032.2	-1.8609	0.563093	-3.30478	0.000950504	0.0258715	1.54903
ENSOARG00020015353	70.1276	2.4786	0.73007	3.39501	0.000686254	0.0258715	1.11766
ENSOARG00020023758	399.161	2.09471	0.633795	3.30503	0.000949678	0.0258715	1.54722
ENSOARG00020010615	180.758	-2.1233	0.633788	-3.35017	0.000807609	0.0258884	1.3073
ENSOARG00020026100	783.628	1.88016	0.529876	3.54831	0.000387718	0.0260971	0.620826
ENSOARG00020023485	3618.7	-1.46045	0.443084	-3.29609	0.000980391	0.0261111	1.56456
ENSOARG00020016908	123.302	2.74373	0.83079	3.30255	0.00095809	0.0262037	1.51551
ENSOARG00020023975	98.4535	3.18381	0.941733	3.3808	0.000722744	0.0262037	1.14286
ENSOARG00020005689	668.899	-1.89121	0.572884	-3.3012	0.00096271	0.0264613	1.50327
ENSOARG00020010462	852.614	-1.50722	0.452767	-3.32892	0.000871842	0.0266537	1.34778
ENSOARG00020023843	3700.04	1.51786	0.461926	3.28593	0.00101645	0.0266943	1.56456
ENSOARG00020016801	35.289	3.06753	0.909321	3.37343	0.000742376	0.0269915	1.11766
ENSOARG00020018133	71.0127	2.42529	0.714391	3.39491	0.00068651	0.0269915	1.0365
ENSOARG00020020874	65.9186	2.72814	0.810169	3.36737	0.000758875	0.0269915	1.14286
ENSOARG00020021833	36.65	-3.25625	0.958973	-3.39556	0.000684886	0.0269915	1.0365
ENSOARG00020012181	119.146	2.75565	0.819473	3.36271	0.000771816	0.0270703	1.14286
ENSOARG00020012201	22.4267	3.03204	0.886649	3.41966	0.000626995	0.0270703	0.930765
ENSOARG00020013733	122.487	2.12459	0.628348	3.38124	0.000721601	0.0270703	1.07549
ENSOARG00020019518	251.956	-1.88393	0.566994	-3.32265	0.000891658	0.0270703	1.32479
ENSOARG00020020217	33.7451	2.71176	0.804419	3.37107	0.000748763	0.0270703	1.11766
ENSOARG00020018402	128216	-1.59936	0.488533	-3.27379	0.00106114	0.0271129	1.56456
ENSOARG00020005702	9.04762	6.51594	1.81825	3.58363	0.000338855	0.0271478	0.492299
ENSOARG00020010309	27.3029	-3.22141	0.943323	-3.41496	0.000637916	0.0271478	0.930765
ENSOARG00020017190	8627.03	-1.49374	0.448417	-3.33114	0.000864899	0.0271478	1.25874
ENSOARG00020018995	1156.29	1.83062	0.552288	3.31461	0.000917713	0.0271478	1.34536
ENSOARG00020020383	596.514	-1.69012	0.510201	-3.31265	0.000924154	0.0271478	1.34536
ENSOARG00020017657	67146.6	2.12112	0.637371	3.32791	0.000874989	0.0272145	1.25874
ENSOARG00020019837	547.402	2.67105	0.807028	3.30974	0.00093382	0.0272145	1.34536
ENSOARG00020026233	925.34	-1.8077	0.546352	-3.30866	0.000937428	0.0272145	1.34778
ENSOARG00020001221	29.3556	2.93544	0.844181	3.47726	0.000506567	0.0272435	0.722675
ENSOARG00020001611	100.882	-2.21549	0.657966	-3.36717	0.000759437	0.0272435	1.07549
ENSOARG00020010726	488.09	2.051	0.583176	3.51695	0.000436543	0.0272435	0.620826
ENSOARG00020014967	99.5102	2.6131	0.776162	3.36669	0.000760754	0.0272435	1.07549
ENSOARG00020017291	2338.05	-1.63172	0.475152	-3.4341	0.000594528	0.0272435	0.841578
ENSOARG00020020078	38.0606	3.81642	1.13611	3.3592	0.000781691	0.0272435	1.11766
ENSOARG00020021211	84.0214	2.2484	0.687573	3.27005	0.00107528	0.0272553	1.51551
ENSOARG00020002025	28540.8	-1.475	0.44436	-3.31939	0.000902151	0.0273183	1.25874
ENSOARG00020013659	334.955	-2.07656	0.62552	-3.31973	0.000901039	0.0273183	1.25818
ENSOARG00020022226	244.223	1.79443	0.54218	3.30966	0.000934079	0.0273183	1.3073
ENSOARG00020009589	221.082	2.68393	0.802466	3.34461	0.000823984	0.0274103	1.14286
ENSOARG00020017320	136.15	1.82802	0.560032	3.26413	0.00109801	0.0274739	1.51551
ENSOARG00020006137	3048.52	-2.09854	0.612564	-3.42582	0.000612937	0.027511	0.841578
ENSOARG00020018899	388.283	-1.74129	0.534725	-3.25642	0.00112827	0.027511	1.54722
ENSOARG00020004797	19888.3	-1.59244	0.489826	-3.25104	0.00114985	0.027609	1.56456
ENSOARG00020009460	3333.87	-1.44331	0.448836	-3.21567	0.00130143	0.027609	1.76929
ENSOARG00020026035	1122.87	-1.88468	0.549269	-3.43125	0.0006008	0.0277252	0.811298
ENSOARG00020011880	61948.4	-1.56005	0.456794	-3.41521	0.000637325	0.0282807	0.841578
ENSOARG00020002887	28.3681	4.15162	1.1816	3.51356	0.000442145	0.028297	0.582037
ENSOARG00020026313	99.8048	2.37201	0.707851	3.35101	0.000805185	0.0284754	1.05065
ENSOARG00020005608	2630.53	-1.58755	0.490601	-3.23593	0.00121249	0.0287226	1.56456
ENSOARG00020009046	168.717	2.56289	0.781209	3.28066	0.00103563	0.0289006	1.32479
ENSOARG00020007192	885.049	1.66568	0.505704	3.29378	0.000988492	0.0289729	1.25818
ENSOARG00020013355	1378.54	-1.73477	0.529962	-3.27339	0.00106267	0.029004	1.34778
ENSOARG00020013195	16.9042	-4.70688	1.34503	-3.49945	0.000466212	0.0296944	0.576109
ENSOARG00020002932	200408	-1.92934	0.569281	-3.38908	0.000701284	0.0301357	0.841578
ENSOARG00020006906	642.694	2.07145	0.597032	3.46958	0.000521281	0.0301357	0.620826
ENSOARG00020007102	85.7817	2.52614	0.758999	3.32825	0.000873945	0.0301357	1.05065
ENSOARG00020012462	1294.39	2.10493	0.645468	3.26109	0.00110985	0.0301357	1.34536
ENSOARG00020014766	639.457	1.88571	0.575334	3.27759	0.00104699	0.0301357	1.25818
ENSOARG00020020483	281.32	2.00288	0.621845	3.22086	0.00127806	0.0301357	1.54722
ENSOARG00020021017	285.156	1.6382	0.502375	3.2609	0.00111058	0.0301357	1.32479
ENSOARG00020023295	71.6655	-2.0076	0.607802	-3.30305	0.000956391	0.0301357	1.14286
ENSOARG00020023719	371.167	2.39397	0.730898	3.27538	0.0010552	0.0301357	1.25818
ENSOARG00020012389	3972.68	-1.62907	0.497938	-3.27164	0.00106927	0.0304127	1.25874
ENSOARG00020022277	172.428	-1.77717	0.538833	-3.29818	0.000973147	0.0304127	1.14286
ENSOARG00020002686	3165.88	-1.52032	0.473697	-3.20947	0.0013298	0.0305878	1.54903
ENSOARG00020001668	93.1654	2.87048	0.893128	3.21396	0.00130918	0.0306814	1.51551
ENSOARG00020002883	87.8513	2.46244	0.744352	3.30817	0.000939073	0.0306814	1.07549
ENSOARG00020009461	287.789	1.80928	0.533416	3.39188	0.000694142	0.0306814	0.800144
ENSOARG00020010784	38.482	-2.96043	0.891952	-3.31905	0.000903253	0.0306814	1.0365
ENSOARG00020012493	8732.84	-1.46526	0.457257	-3.20445	0.0013532	0.0306814	1.54903
ENSOARG00020025947	151.273	2.8485	0.865375	3.29163	0.000996072	0.0306814	1.14286
ENSOARG00020017982	74.7725	2.23085	0.678129	3.28972	0.00100288	0.0307463	1.14286
ENSOARG00020005466	1240.68	1.85235	0.571957	3.23863	0.00120107	0.031206	1.34536
ENSOARG00020006754	1289.6	-1.6106	0.498013	-3.23406	0.00122045	0.0316346	1.34536
ENSOARG00020018339	234.945	2.45362	0.720182	3.40695	0.000656927	0.0321458	0.710965
ENSOARG00020013780	153.531	2.40198	0.705306	3.40559	0.000660215	0.032155	0.710965
ENSOARG00020016877	44.7928	3.69908	1.12768	3.28026	0.00103711	0.032155	1.11766
ENSOARG00020010926	334.979	2.45249	0.755671	3.24544	0.00117269	0.0321937	1.25818
ENSOARG00020013489	739.603	1.77304	0.515387	3.44021	0.000581269	0.0321937	0.620826
ENSOARG00020017979	521.075	-1.62144	0.507699	-3.1937	0.00140463	0.0321937	1.50327
ENSOARG00020024401	18.3517	-3.36149	0.971926	-3.45858	0.000543025	0.0323346	0.576109
ENSOARG00020015697	102.976	2.18861	0.686733	3.18698	0.00143765	0.0324669	1.51551
ENSOARG00020001563	1102.17	2.3003	0.716686	3.20963	0.00132906	0.0326333	1.38744
ENSOARG00020007774	2049.85	1.68694	0.524085	3.21884	0.00128712	0.0326333	1.34536
ENSOARG00020004744	300.271	-2.01247	0.633429	-3.17711	0.00148753	0.0326772	1.54722
ENSOARG00020024350	293.857	-1.53564	0.48359	-3.1755	0.00149576	0.0327825	1.54722
ENSOARG00020019577	12440.1	-1.48778	0.444622	-3.34617	0.000819355	0.0329392	0.841578
ENSOARG00020022679	436.321	2.05223	0.625925	3.27871	0.00104281	0.0329917	1.06694
ENSOARG00020011864	56.9151	2.19881	0.673767	3.26345	0.00110063	0.0331648	1.11766
ENSOARG00020001727	120.685	2.69921	0.851876	3.16855	0.00153202	0.0334867	1.51551
ENSOARG00020009016	90.5167	2.41715	0.743233	3.25221	0.00114511	0.0334867	1.14286
ENSOARG00020009111	456.475	1.84096	0.582137	3.16243	0.00156461	0.0334867	1.54722
ENSOARG00020014077	109.089	2.04735	0.646201	3.16828	0.00153344	0.0334867	1.51551
ENSOARG00020015888	897.151	1.80195	0.562017	3.20623	0.00134489	0.0334867	1.34536
ENSOARG00020021730	733.269	1.77144	0.558472	3.17194	0.00151425	0.0334867	1.50327
ENSOARG00020024633	772.003	-1.80668	0.56985	-3.17045	0.00152203	0.0334867	1.50327
ENSOARG00020026177	129.507	2.44012	0.752428	3.24299	0.00118283	0.0334867	1.17044
ENSOARG00020013743	126.536	1.92238	0.592015	3.24718	0.00116554	0.0336548	1.14286
ENSOARG00020001206	84.3077	-1.82449	0.576633	-3.16404	0.00155595	0.033805	1.51551
ENSOARG00020023963	260.882	-1.78178	0.556574	-3.20133	0.00136795	0.0343773	1.3073
ENSOARG00020001743	65.6688	2.90265	0.862082	3.36702	0.00075985	0.0344662	0.722675
ENSOARG00020001063	632.79	2.60075	0.815536	3.18901	0.00142761	0.0344776	1.34536
ENSOARG00020003307	6259.22	-1.52167	0.489349	-3.10958	0.00187351	0.0344776	1.76929
ENSOARG00020006642	211.094	1.95939	0.612564	3.19867	0.00138062	0.0344776	1.3073
ENSOARG00020017748	36.6763	-3.19633	0.979215	-3.26417	0.00109784	0.0344776	1.0365
ENSOARG00020021220	985.039	-1.83847	0.552027	-3.33039	0.000867249	0.0345796	0.811298
ENSOARG00020025433	496.771	-1.90935	0.599122	-3.18692	0.00143798	0.0345796	1.34536
ENSOARG00020013410	78.9333	2.61809	0.831102	3.15014	0.00163192	0.0347574	1.51551
ENSOARG00020003712	180.97	1.66087	0.520387	3.19161	0.00141481	0.0348562	1.3073
ENSOARG00020016293	71.7282	2.27523	0.699509	3.25261	0.00114349	0.0349302	1.05065
ENSOARG00020019678	2947.35	1.88066	0.567357	3.31478	0.000917161	0.0349302	0.841578
ENSOARG00020025095	56.0849	3.80921	1.18014	3.22777	0.0012476	0.0349302	1.14286
ENSOARG00020023119	660.091	-1.98317	0.62373	-3.17954	0.00147509	0.0349445	1.34778
ENSOARG00020022577	38.5414	2.80269	0.835303	3.3553	0.000792795	0.0349509	0.722675
ENSOARG00020025917	199.626	2.44595	0.758381	3.22523	0.00125872	0.0350138	1.14286
ENSOARG00020018597	998.784	-1.66572	0.525822	-3.16784	0.00153575	0.0351135	1.38744
ENSOARG00020023380	50.0142	-4.28252	1.31866	-3.24764	0.00116366	0.035538	1.0365
ENSOARG00020023648	74.0975	-3.22714	0.997282	-3.23593	0.00121245	0.0356094	1.07549
ENSOARG00020022317	1899.54	1.69741	0.512701	3.31073	0.000930533	0.0361516	0.811298
ENSOARG00020009117	190.683	1.95724	0.61675	3.17347	0.00150626	0.0362388	1.3073
ENSOARG00020018610	230.483	2.01754	0.634163	3.18142	0.00146557	0.0365584	1.25818
ENSOARG00020017542	1160.49	-2.38455	0.756536	-3.15193	0.00162195	0.0366118	1.38744
ENSOARG00020014801	76.2925	-2.44518	0.762807	-3.2055	0.00134826	0.0368688	1.14286
ENSOARG00020002260	71.3394	2.40454	0.752617	3.1949	0.00139877	0.0371131	1.17044
ENSOARG00020009032	293.709	1.87873	0.591815	3.17452	0.00150085	0.0371131	1.25818
ENSOARG00020023051	949.166	1.66878	0.53037	3.14645	0.00165267	0.0371131	1.38744
ENSOARG00020024414	132.352	2.01408	0.645771	3.11888	0.00181541	0.0371219	1.51551
ENSOARG00020018949	339.625	-1.7481	0.562718	-3.10654	0.00189294	0.0378345	1.54722
ENSOARG00020005225	888.275	-1.81499	0.577036	-3.14537	0.00165875	0.0380485	1.34536
ENSOARG00020025974	41.9397	-2.72769	0.867417	-3.14461	0.00166306	0.0380633	1.34552
ENSOARG00020018491	19.5042	3.77504	1.10193	3.42586	0.000612856	0.0382569	0.492299
ENSOARG00020016798	401.816	2.08009	0.632414	3.28912	0.001005	0.0384389	0.800144
ENSOARG00020022614	1535	1.85683	0.591345	3.14001	0.00168941	0.0384389	1.34778
ENSOARG00020024938	165.977	-1.89131	0.60231	-3.1401	0.00168892	0.0389347	1.32479
ENSOARG00020001532	105.011	2.46358	0.770438	3.19764	0.00138557	0.0390689	1.07549
ENSOARG00020003273	1439.44	-1.63604	0.522302	-3.13235	0.00173412	0.0390689	1.34778
ENSOARG00020004826	9609.33	-1.38039	0.44698	-3.08827	0.00201328	0.0390689	1.56456
ENSOARG00020012441	628.564	-1.50888	0.482135	-3.12959	0.00175053	0.0390689	1.34778
ENSOARG00020016023	158.157	1.77347	0.535382	3.31253	0.000924568	0.0390689	0.710965
ENSOARG00020016288	146.554	2.80476	0.882394	3.17858	0.00147997	0.0390689	1.14286
ENSOARG00020020000	53.3539	2.7379	0.853494	3.20788	0.00133717	0.0390689	1.0365
ENSOARG00020020958	25430	-1.49678	0.458358	-3.26553	0.00109261	0.0390689	0.841578
ENSOARG00020002651	380.567	1.59116	0.50802	3.13207	0.00173576	0.0392611	1.32479
ENSOARG00020011216	751.499	1.58156	0.505843	3.12658	0.0017685	0.0392611	1.34778
ENSOARG00020007019	5882.95	-1.71958	0.558399	-3.07947	0.00207367	0.0394969	1.56456
ENSOARG00020021695	12734.7	-1.53454	0.504245	-3.04324	0.00234044	0.0394969	1.76929
ENSOARG00020007039	76.6139	-2.07368	0.650916	-3.1858	0.00144356	0.0399182	1.07549
ENSOARG00020010213	104.036	2.50499	0.792702	3.16006	0.00157734	0.0399984	1.17044
ENSOARG00020002022	104.853	1.82789	0.572975	3.19017	0.0014219	0.0400068	1.05065
ENSOARG00020022693	41.7858	2.74168	0.858211	3.19464	0.00140004	0.0400068	1.0365
ENSOARG00020005530	37.7006	3.34934	1.05844	3.16441	0.00155396	0.0400339	1.14286
ENSOARG00020021594	162.667	2.32258	0.74401	3.1217	0.00179807	0.0400339	1.32479
ENSOARG00020000897	11.2634	-6.09095	1.77039	-3.44046	0.000580725	0.0400987	0.425055
ENSOARG00020014896	3369.56	-1.36007	0.443052	-3.06978	0.00214217	0.0400987	1.56456
ENSOARG00020020604	160.605	1.95367	0.626389	3.11894	0.00181504	0.0400987	1.32479
ENSOARG00020025892	13.6927	5.241	1.52421	3.4385	0.000584955	0.0401983	0.425055
ENSOARG00020016824	65.9089	2.34655	0.741735	3.1636	0.00155832	0.040646	1.11766
ENSOARG00020021969	1218.8	-1.4638	0.458519	-3.19245	0.0014107	0.0407326	1.00764
ENSOARG00020005044	11414.9	-1.53363	0.500917	-3.06163	0.00220133	0.0408555	1.56456
ENSOARG00020021579	45435.4	-1.44259	0.445132	-3.24082	0.00119186	0.0410426	0.841578
ENSOARG00020004742	62.9242	2.13391	0.650348	3.28118	0.00103374	0.0411987	0.722675
ENSOARG00020018417	29.5533	3.17129	1.00703	3.14915	0.00163747	0.0411987	1.14286
ENSOARG00020020114	197.861	2.01924	0.640906	3.1506	0.00162937	0.0411987	1.14286
ENSOARG00020025956	479.234	-1.84102	0.593574	-3.10159	0.00192483	0.0411987	1.34778
ENSOARG00020013750	147.743	-2.97007	0.956579	-3.10489	0.0019035	0.0412349	1.32479
ENSOARG00020007966	3706.32	-1.63439	0.53472	-3.05653	0.00223918	0.0414042	1.54903
ENSOARG00020000671	1562.2	-1.4906	0.460154	-3.23936	0.00119799	0.0417968	0.811298
ENSOARG00020001253	318.992	1.66883	0.547343	3.04897	0.00229625	0.0417968	1.54722
ENSOARG00020001915	19.0955	-4.08424	1.27777	-3.19639	0.00139158	0.0417968	0.930765
ENSOARG00020003074	135.813	-2.1941	0.699342	-3.13738	0.00170462	0.0417968	1.14286
ENSOARG00020004760	615.271	1.98594	0.638499	3.11033	0.00186875	0.0417968	1.25818
ENSOARG00020007474	1149.75	3.09198	1.00153	3.08725	0.0020202	0.0417968	1.34778
ENSOARG00020007976	146.491	1.68869	0.545445	3.09599	0.00196159	0.0417968	1.32479
ENSOARG00020010106	2268.49	-1.46319	0.479506	-3.05144	0.00227743	0.0417968	1.54903
ENSOARG00020016123	44359.3	-1.48982	0.479328	-3.10815	0.00188263	0.0417968	1.25874
ENSOARG00020021071	1666.19	-1.50994	0.475327	-3.17663	0.00148994	0.0417968	1.00764
ENSOARG00020022731	525.435	-1.45362	0.46685	-3.11367	0.00184775	0.0417968	1.25818
ENSOARG00020023075	49.8866	2.31895	0.750948	3.08804	0.00201485	0.0417968	1.34552
ENSOARG00020024848	607.299	-1.50963	0.455705	-3.31274	0.00092386	0.0417968	0.620826
ENSOARG00020026367	110.157	2.38473	0.754921	3.15891	0.00158359	0.0417968	1.07549
ENSOARG00020011095	162.413	-1.9838	0.642228	-3.08894	0.00200874	0.042201	1.32479
ENSOARG00020020210	531.951	1.69717	0.556802	3.04807	0.00230314	0.0425607	1.50327
ENSOARG00020012603	3531.23	-2.01052	0.670967	-2.99645	0.00273141	0.0428054	1.76929
ENSOARG00020004992	3170.67	2.3545	0.77669	3.03145	0.0024338	0.0429708	1.56456
ENSOARG00020005776	23196.6	1.78493	0.555309	3.2143	0.00130765	0.0429708	0.841578
ENSOARG00020023606	42492	-1.54974	0.500728	-3.09497	0.00196834	0.043035	1.25874
ENSOARG00020025244	378.335	-1.45452	0.479456	-3.0337	0.00241577	0.043035	1.54722
ENSOARG00020001104	69.2335	2.16623	0.705091	3.07227	0.00212438	0.0432324	1.34552
ENSOARG00020021421	567.034	-1.54308	0.502161	-3.07288	0.00212003	0.0432324	1.34536
ENSOARG00020024064	1440.73	1.5912	0.518036	3.07161	0.00212909	0.0432324	1.34778
ENSOARG00020003266	30.5672	3.87897	1.26415	3.06843	0.00215188	0.0435101	1.34552
ENSOARG00020009345	32.8861	-2.61643	0.839623	-3.1162	0.00183197	0.0435101	1.14286
ENSOARG00020019669	602.082	-1.67671	0.546704	-3.06694	0.00216265	0.0435101	1.34778
ENSOARG00020019734	185.666	2.00145	0.641982	3.1176	0.00182327	0.0435101	1.14286
ENSOARG00020026205	27094.6	-1.67985	0.555038	-3.02654	0.00247368	0.0435101	1.54903
ENSOARG00020013006	1849.48	1.38256	0.451053	3.0652	0.00217527	0.0436838	1.34778
ENSOARG00020004450	64.8207	2.8658	0.935372	3.06381	0.00218539	0.0437201	1.34552
ENSOARG00020005995	140.944	2.18866	0.702984	3.11339	0.00184952	0.0437201	1.14286
ENSOARG00020021803	617.465	1.49599	0.488231	3.0641	0.00218328	0.0437201	1.34536
ENSOARG00020000744	506.166	2.16794	0.715739	3.02896	0.00245397	0.0437815	1.50327
ENSOARG00020008656	103.841	-2.48412	0.793855	-3.12918	0.00175292	0.0437815	1.07549
ENSOARG00020010596	471.062	-1.57025	0.501953	-3.12828	0.00175835	0.0441199	1.06694
ENSOARG00020008826	14.2849	4.30931	1.36091	3.16649	0.0015429	0.0442976	0.930765
ENSOARG00020012533	4467.56	-1.38482	0.450327	-3.07514	0.00210402	0.0445871	1.25874
ENSOARG00020019849	129.563	-2.09263	0.676615	-3.09279	0.00198285	0.045108	1.17044
ENSOARG00020004254	32.7538	2.32574	0.762517	3.05009	0.00228775	0.0451906	1.34552
ENSOARG00020000843	246.952	-6.32955	2.07284	-3.05356	0.00226145	0.0452884	1.32479
ENSOARG00020012558	68.5261	1.9179	0.613805	3.1246	0.00178044	0.0454094	1.0365
ENSOARG00020016709	2614.24	1.37431	0.457879	3.00148	0.00268671	0.0454094	1.56456
ENSOARG00020001506	45.9764	-2.17598	0.714701	-3.0446	0.00232993	0.0456281	1.34552
ENSOARG00020019276	97.8564	2.34269	0.75909	3.08618	0.00202744	0.0456281	1.17044
ENSOARG00020002802	141.241	2.14851	0.705193	3.0467	0.00231372	0.0459223	1.32479
ENSOARG00020000178	315.06	-1.80732	0.593856	-3.04336	0.00233949	0.0463316	1.32479
ENSOARG00020003476	42358.9	-1.35112	0.441785	-3.05831	0.00222587	0.0463316	1.25874
ENSOARG00020022377	49.8874	2.04006	0.671697	3.03718	0.00238806	0.0464193	1.34552
ENSOARG00020007653	365.947	2.20541	0.721643	3.0561	0.0022424	0.046531	1.25818
ENSOARG00020003492	749.051	-2.04924	0.683313	-2.99899	0.0027088	0.0467142	1.50327
ENSOARG00020004457	24.6163	3.03126	0.92391	3.2809	0.00103476	0.0467142	0.576109
ENSOARG00020015906	1649.32	-1.70987	0.548048	-3.11993	0.00180896	0.0467142	1.00764
ENSOARG00020018769	50566.5	-1.3957	0.440055	-3.17165	0.00151575	0.0467142	0.841578
ENSOARG00020009031	105.546	1.94986	0.633229	3.07923	0.00207537	0.0469122	1.14286
ENSOARG00020010490	112.694	1.78954	0.582477	3.07229	0.00212426	0.0469122	1.17044
ENSOARG00020002389	55.5634	-2.43364	0.803397	-3.02918	0.00245216	0.0469986	1.34552
ENSOARG00020021294	1540.3	-1.45864	0.482231	-3.02479	0.00248809	0.0476096	1.34536
ENSOARG00020010897	79.7775	-2.26742	0.759445	-2.98562	0.00283001	0.0479887	1.51551
ENSOARG00020017261	123.703	1.94565	0.652371	2.98242	0.00285979	0.0483315	1.51551
ENSOARG00020024171	107.561	2.11107	0.682577	3.09279	0.00198284	0.0483315	1.05065
ENSOARG00020025035	591.146	2.21906	0.744148	2.98201	0.00286362	0.0486994	1.50327
ENSOARG00020008975	1671.92	-1.7965	0.597765	-3.00535	0.00265271	0.0487791	1.38744
ENSOARG00020011848	129.911	1.62881	0.54705	2.97744	0.00290669	0.0487791	1.51551
ENSOARG00020019422	33.8652	2.31904	0.75705	3.06326	0.00218942	0.0487791	1.14286
ENSOARG00020003904	105.185	2.90021	0.94928	3.05517	0.00224936	0.0487925	1.17044
ENSOARG00020005415	9.39475	5.59207	1.71494	3.2608	0.00111098	0.0487925	0.576109
ENSOARG00020008589	99.2563	2.10649	0.688106	3.06129	0.00220389	0.0487925	1.14286
ENSOARG00020009332	825.889	1.88423	0.58176	3.23885	0.00120012	0.0488275	0.620826
ENSOARG00020022383	10014.7	-1.81604	0.599214	-3.0307	0.00243986	0.0488758	1.25874
ENSOARG00020013779	38977.6	-1.31469	0.449471	-2.92496	0.00344495	0.0490127	1.76929
ENSOARG00020001437	22949.7	-1.56568	0.497691	-3.1459	0.00165579	0.0490242	0.841578
ENSOARG00020014609	395.772	2.10392	0.695157	3.02654	0.00247371	0.0490242	1.25818
ENSOARG00020019762	3543.84	1.95638	0.660126	2.96365	0.00304011	0.0490242	1.54903
ENSOARG00020020889	115.67	1.90144	0.623394	3.05015	0.0022873	0.0490242	1.17044
ENSOARG00020023193	416.443	1.93621	0.629074	3.07787	0.00208484	0.0490242	1.06694
ENSOARG00020023560	28.1121	3.74505	1.13487	3.29999	0.000966898	0.0490242	0.492299
ENSOARG00020025006	548.809	1.93279	0.650923	2.9693	0.00298474	0.0493897	1.50327
ENSOARG00020003196	769.549	-1.50752	0.502293	-3.00127	0.00268856	0.0496267	1.34536
ENSOARG00020002902	51624.3	-1.37668	0.47207	-2.91627	0.00354239	0.0496367	1.76929
ENSOARG00020018437	145.685	1.70057	0.563011	3.0205	0.00252359	0.0496423	1.25818
ENSOARG00020006102	1360.45	1.86081	0.620579	2.99851	0.00271303	0.0497199	1.34778
ENSOARG00020010664	196.626	2.01584	0.670305	3.00734	0.00263543	0.0497199	1.3073
ENSOARG00020023945	617.061	1.57469	0.488058	3.22643	0.00125344	0.0497199	0.620826
ENSOARG00020009822	31.5265	2.61826	0.851188	3.07601	0.00209793	0.0497613	1.0365
ENSOARG00020019322	46126.2	-1.4156	0.451311	-3.13665	0.0017089	0.049839	0.841578
ENSOARG00020002136	256.64	1.7902	0.58798	3.04465	0.00232948	0.0499447	1.14286
ENSOARG00020002289	212.786	2.17248	0.72462	2.9981	0.00271668	0.0501091	1.32479
ENSOARG00020009650	302.465	2.3829	0.794848	2.99793	0.00271818	0.0501091	1.32479
ENSOARG00020008582	45911.2	-1.42048	0.489064	-2.90449	0.00367851	0.0502765	1.76929
ENSOARG00020009956	1053.27	-1.56281	0.497584	-3.14079	0.00168496	0.0502765	0.811298
ENSOARG00020013259	205.815	2.00173	0.668356	2.99501	0.00274435	0.0502765	1.32479
ENSOARG00020016698	275.561	1.88973	0.627784	3.01016	0.00261108	0.0502765	1.25818
ENSOARG00020017661	18.2012	-3.24743	1.04716	-3.10118	0.0019275	0.0502765	0.930765
ENSOARG00020019407	1052.01	1.99827	0.635862	3.14262	0.00167444	0.0502765	0.811298
ENSOARG00020025827	404.36	1.54939	0.514946	3.00884	0.00262247	0.0503207	1.25818
ENSOARG00020000946	235.764	-3.33888	1.05149	-3.17537	0.00149645	0.0503816	0.710965
ENSOARG00020001847	32.0934	3.34343	1.11995	2.98534	0.0028326	0.0503816	1.34552
ENSOARG00020001900	54.3365	-2.22714	0.732315	-3.04124	0.00235608	0.0503816	1.11766
ENSOARG00020002639	58.2526	-2.47547	0.829568	-2.98404	0.00284466	0.0503816	1.34552
ENSOARG00020015669	19.5685	4.23949	1.3106	3.23477	0.00121742	0.0503816	0.576109
ENSOARG00020022340	149.331	-2.23988	0.738222	-3.03416	0.00241208	0.0503816	1.14286
ENSOARG00020024908	2811.22	-1.61314	0.556255	-2.89999	0.00373169	0.0503816	1.76929
ENSOARG00020024955	45.0514	2.2725	0.747408	3.04051	0.00236176	0.0503816	1.11766
ENSOARG00020023942	15.2072	4.79499	1.46359	3.27618	0.00105223	0.0508523	0.492299
ENSOARG00020020772	437.474	1.76909	0.580251	3.04883	0.00229731	0.0510635	1.06694
ENSOARG00020024961	575.899	1.64322	0.547921	2.99901	0.00270861	0.0510635	1.25818
ENSOARG00020008622	16629.6	-1.36681	0.455935	-2.99781	0.00271929	0.0511508	1.25874
ENSOARG00020011926	540.656	-1.50261	0.505262	-2.97392	0.0029402	0.0515798	1.34536
ENSOARG00020023268	815.854	-2.0665	0.694759	-2.97441	0.0029355	0.0515798	1.34536
ENSOARG00020006543	49.0937	2.502	0.82578	3.02987	0.00244661	0.0515824	1.11766
ENSOARG00020025429	30877.7	-1.35886	0.45398	-2.99321	0.00276059	0.0515963	1.25874
ENSOARG00020012273	269.506	2.17148	0.725612	2.99261	0.002766	0.0516381	1.25818
ENSOARG00020016151	112.633	2.15145	0.706224	3.04641	0.00231589	0.0516931	1.05065
ENSOARG00020016067	70.6817	2.14125	0.67845	3.1561	0.00159897	0.0518057	0.722675
ENSOARG00020000198	533.77	-2.97357	1.00139	-2.96945	0.00298336	0.0518235	1.34536
ENSOARG00020018656	224.199	2.48744	0.787321	3.15937	0.00158109	0.0518235	0.710965
ENSOARG00020023136	105.404	2.13261	0.702233	3.03689	0.00239031	0.0518235	1.07549
ENSOARG00020021458	48113.1	-1.27712	0.43704	-2.9222	0.00347572	0.0522057	1.54903
ENSOARG00020001804	157.911	2.16485	0.718898	3.01135	0.00260089	0.0528659	1.14286
ENSOARG00020012576	306.175	1.66076	0.569294	2.91723	0.00353153	0.0529389	1.54722
ENSOARG00020018853	217.498	-1.73647	0.586172	-2.96238	0.00305267	0.05336	1.32479
ENSOARG00020001689	1542.16	-1.51145	0.486343	-3.10779	0.00188491	0.0536861	0.811298
ENSOARG00020011470	14.7431	-3.32488	1.08437	-3.0662	0.00216801	0.0536861	0.930765
ENSOARG00020021925	3722.93	-1.33881	0.460421	-2.9078	0.00363981	0.0536861	1.56456
ENSOARG00020001756	227.104	1.83011	0.609584	3.00222	0.00268015	0.0537284	1.14286
ENSOARG00020002004	375.479	-2.15592	0.713279	-3.02254	0.00250659	0.0537284	1.06694
ENSOARG00020007017	208.086	1.92456	0.650793	2.95726	0.00310389	0.0537284	1.32479
ENSOARG00020009915	365.43	-2.54918	0.861877	-2.95771	0.00309935	0.0537284	1.32479
ENSOARG00020017426	345.715	1.71173	0.57581	2.97273	0.00295165	0.0537284	1.25818
ENSOARG00020019107	2201.39	-1.5787	0.551197	-2.86414	0.00418149	0.0539662	1.76929
ENSOARG00020024813	39.4035	-2.22612	0.754889	-2.94893	0.00318875	0.0540317	1.34552
ENSOARG00020021119	2058.67	1.52223	0.516408	2.94774	0.00320108	0.054066	1.34778
ENSOARG00020009900	2983.53	-1.43629	0.494965	-2.9018	0.00371031	0.0544412	1.54903
ENSOARG00020001308	784.35	2.17726	0.734355	2.96486	0.0030282	0.054499	1.25818
ENSOARG00020007618	570.853	1.41361	0.476829	2.9646	0.0030308	0.054499	1.25818
ENSOARG00020012479	91.6574	2.24117	0.770755	2.90776	0.00364026	0.054499	1.51551
ENSOARG00020013396	63.3886	2.07227	0.704687	2.94069	0.00327481	0.0549478	1.34552
ENSOARG00020017169	82.7488	1.92622	0.638623	3.01621	0.00255955	0.0549478	1.05065
ENSOARG00020018631	1182.37	1.92877	0.624068	3.09064	0.00199726	0.0554415	0.811298
ENSOARG00020016278	121.25	2.54236	0.87681	2.89955	0.00373696	0.0554435	1.51551
ENSOARG00020024566	46.6542	2.24358	0.749539	2.99328	0.00275997	0.0554435	1.11766
ENSOARG00020004194	14.0956	5.11942	1.5627	3.276	0.00105287	0.0555298	0.425055
ENSOARG00020011064	373	2.09471	0.697002	3.00532	0.00265305	0.0556596	1.06694
ENSOARG00020003294	23.467	3.21574	1.01005	3.18375	0.00145381	0.0556691	0.582037
ENSOARG00020007037	255.32	1.81287	0.61717	2.9374	0.00330977	0.0556691	1.32479
ENSOARG00020020036	30590	-1.46581	0.507881	-2.88613	0.00390011	0.0556691	1.56456
ENSOARG00020014431	9587.32	-1.90458	0.669519	-2.8447	0.0044453	0.0558998	1.76929
ENSOARG00020022058	2364.7	-1.82416	0.618168	-2.95092	0.00316831	0.055917	1.25874
ENSOARG00020001789	156.786	1.82321	0.618098	2.94971	0.00318071	0.0559442	1.25818
ENSOARG00020018657	69.224	2.29537	0.736447	3.11682	0.00182811	0.0559442	0.722675
ENSOARG00020024797	3250.16	2.66762	0.925548	2.8822	0.00394907	0.0559442	1.56456
ENSOARG00020003394	533.235	-2.11301	0.716883	-2.94749	0.00320365	0.0561508	1.25818
ENSOARG00020019596	375.6	-1.59673	0.544687	-2.93146	0.0033737	0.0561508	1.32479
ENSOARG00020021755	125.597	2.10728	0.708352	2.9749	0.00293086	0.0563767	1.14286
ENSOARG00020024392	337.921	1.67099	0.570383	2.92959	0.00339412	0.0563767	1.32479
ENSOARG00020006381	1070.12	1.41578	0.459966	3.07801	0.00208385	0.0563818	0.811298
ENSOARG00020007097	3971.95	-1.50744	0.523748	-2.87818	0.00399982	0.0565642	1.54903
ENSOARG00020010177	1952.2	-1.43763	0.491991	-2.92207	0.00347711	0.0565642	1.34536
ENSOARG00020021190	851.001	-1.40648	0.481874	-2.91878	0.00351404	0.0570802	1.34536
ENSOARG00020023733	52.7179	2.33758	0.779924	2.99719	0.00272478	0.0573636	1.0365
ENSOARG00020019109	1349.16	1.93681	0.664539	2.91451	0.00356248	0.0576961	1.34536
ENSOARG00020013556	335.245	-1.71448	0.584294	-2.93427	0.00334333	0.0578134	1.25818
ENSOARG00020011321	175.469	1.6397	0.562298	2.91607	0.00354473	0.058043	1.32479
ENSOARG00020022826	55.4336	2.53995	0.857479	2.96211	0.00305537	0.058043	1.14286
ENSOARG00020025464	275.151	-2.03853	0.699722	-2.91334	0.0035758	0.0584658	1.32479
ENSOARG00020012005	524.74	1.59135	0.547732	2.90534	0.00366858	0.0588925	1.34536
ENSOARG00020019553	73.4306	2.19442	0.744135	2.94895	0.00318851	0.0588925	1.17044
ENSOARG00020009368	38.0715	-2.56496	0.883083	-2.90455	0.0036778	0.0589159	1.34552
ENSOARG00020023927	120.94	1.82672	0.619724	2.94763	0.00320221	0.0589159	1.17044
ENSOARG00020005546	276.425	-1.51666	0.521619	-2.9076	0.00364219	0.0589343	1.32479
ENSOARG00020006422	201.203	1.75233	0.593357	2.95325	0.00314445	0.0589343	1.14286
ENSOARG00020009413	1673.98	-1.359	0.454139	-2.99249	0.00276715	0.0589343	1.00764
ENSOARG00020021510	1287.81	-1.77237	0.61078	-2.90181	0.00371008	0.0589343	1.34778
ENSOARG00020019599	66.9043	2.48562	0.842069	2.9518	0.00315929	0.0590973	1.14286
ENSOARG00020002265	385.58	-1.97093	0.674961	-2.92006	0.00349967	0.0592784	1.25818
ENSOARG00020004969	74.8272	-1.99487	0.670475	-2.97531	0.00292697	0.0592784	1.05065
ENSOARG00020010150	189.243	1.56102	0.504705	3.09293	0.00198193	0.0592784	0.710965
ENSOARG00020020454	3938.51	-1.56235	0.547466	-2.85379	0.0043201	0.0592784	1.54903
ENSOARG00020001858	49.356	2.37726	0.806952	2.94598	0.00321937	0.0597019	1.14286
ENSOARG00020002283	6625.05	1.70632	0.58509	2.91635	0.00354157	0.0597019	1.25874
ENSOARG00020014445	9.87552	-5.89867	1.96133	-3.00749	0.00263419	0.0598957	0.930765
ENSOARG00020011307	27.9772	3.41605	1.05508	3.23773	0.00120484	0.0599031	0.425055
ENSOARG00020018247	515.343	1.72545	0.596598	2.89215	0.00382611	0.0599079	1.34778
ENSOARG00020006787	18.9694	3.79683	1.20738	3.14468	0.00166266	0.0601519	0.582037
ENSOARG00020021357	29.0792	2.52423	0.849463	2.97156	0.00296289	0.0601519	1.0365
ENSOARG00020004393	1852.62	-1.67186	0.561539	-2.97729	0.00290812	0.0601638	1.00764
ENSOARG00020005201	132.064	2.37182	0.801561	2.959	0.00308638	0.0601638	1.07549
ENSOARG00020013255	345.129	2.17284	0.713081	3.04712	0.00231044	0.0601638	0.800144
ENSOARG00020014299	2137.88	1.32308	0.465708	2.84101	0.00449705	0.0601638	1.56456
ENSOARG00020016134	36448.1	-1.3063	0.460114	-2.83908	0.00452431	0.0601638	1.56456
ENSOARG00020021033	1909.04	-1.43016	0.496875	-2.87832	0.00399803	0.0601638	1.38744
ENSOARG00020021386	133.242	1.99407	0.672714	2.96422	0.00303455	0.0601638	1.05065
ENSOARG00020025291	24316.3	-1.44132	0.475445	-3.03152	0.0024333	0.0601638	0.841578
ENSOARG00020015977	16.0941	4.20825	1.40255	3.00043	0.00269596	0.0601778	0.930765
ENSOARG00020012137	196.928	2.16016	0.736283	2.93387	0.0033476	0.0607702	1.14286
ENSOARG00020004422	36344.9	-1.50762	0.519275	-2.90332	0.00369227	0.0607713	1.25874
ENSOARG00020025879	25113.2	-1.32507	0.4378	-3.02666	0.00247269	0.0607864	0.841578
ENSOARG00020026221	135.25	1.85393	0.633825	2.92499	0.00344471	0.0608034	1.17044
ENSOARG00020001937	106.778	-1.9635	0.669731	-2.93177	0.00337031	0.0608402	1.14286
ENSOARG00020004634	820.316	-2.07571	0.715668	-2.90038	0.00372709	0.0609437	1.25818
ENSOARG00020019436	246.487	-1.73394	0.600246	-2.88872	0.00386811	0.0609437	1.3073
ENSOARG00020011808	37.9454	2.47058	0.843383	2.92937	0.00339649	0.0610566	1.14286
ENSOARG00020008285	388.766	1.78451	0.604946	2.94986	0.00317915	0.0611312	1.06694
ENSOARG00020025524	28.9905	2.61166	0.873388	2.99026	0.00278736	0.061354	0.930765
ENSOARG00020002418	2728.54	1.55659	0.558775	2.78573	0.00534076	0.0615991	1.76929
ENSOARG00020003577	499.394	-2.02427	0.704613	-2.87288	0.00406752	0.0615991	1.34536
ENSOARG00020013039	312.118	-1.47318	0.509015	-2.89417	0.00380162	0.0615991	1.25818
ENSOARG00020013235	738.738	1.47802	0.51438	2.87341	0.00406072	0.0615991	1.34778
ENSOARG00020018373	84.7775	1.95644	0.670979	2.91579	0.00354787	0.0616741	1.17044
ENSOARG00020009124	239.043	2.88696	0.987926	2.92224	0.00347524	0.0617838	1.14286
ENSOARG00020002503	396.679	1.93983	0.671041	2.89078	0.00384284	0.0619721	1.25818
ENSOARG00020006087	3613.65	-1.31394	0.472401	-2.7814	0.00541246	0.061985	1.76929
ENSOARG00020014319	119663	1.54322	0.547409	2.81914	0.00481522	0.0622756	1.56456
ENSOARG00020011522	3605.61	-1.44179	0.510959	-2.82173	0.00477651	0.0623088	1.54903
ENSOARG00020006262	147.413	-1.63044	0.532643	-3.06103	0.00220577	0.0626061	0.710965
ENSOARG00020019456	34.3364	2.59279	0.880357	2.94515	0.00322794	0.062672	1.0365
ENSOARG00020019802	3134.07	2.14361	0.712392	3.00904	0.00262078	0.062672	0.841578
ENSOARG00020008679	1358.63	-1.45156	0.509324	-2.84997	0.00437232	0.0633318	1.38744
ENSOARG00020002486	678.509	-1.66263	0.577508	-2.87898	0.00398968	0.0634672	1.25818
ENSOARG00020009034	87.6706	2.45604	0.844134	2.90954	0.00361966	0.0634672	1.14286
ENSOARG00020026214	203.394	1.95455	0.671745	2.90966	0.00361824	0.0634672	1.14286
ENSOARG00020012325	68.0461	2.11805	0.726536	2.91527	0.00355384	0.0635555	1.11766
ENSOARG00020016079	29723.1	-1.36685	0.486359	-2.81038	0.00494837	0.0637646	1.54903
ENSOARG00020019871	44935.5	-1.30719	0.454732	-2.87463	0.00404507	0.0640383	1.25874
ENSOARG00020022397	1744.02	-1.3015	0.442122	-2.94375	0.00324258	0.0640383	1.00764
ENSOARG00020024609	96.6315	2.01743	0.694648	2.90424	0.00368143	0.0640383	1.14286
ENSOARG00020020286	5380.02	-1.55416	0.554427	-2.80318	0.00506019	0.0642106	1.56456
ENSOARG00020001325	61.0193	2.18358	0.753341	2.89853	0.00374921	0.0650362	1.14286
ENSOARG00020001975	2151.06	-1.40921	0.503403	-2.79937	0.00512021	0.0650362	1.54903
ENSOARG00020012050	18937.3	-1.62321	0.579755	-2.79981	0.00511327	0.0650362	1.54903
ENSOARG00020016774	573.367	-1.72151	0.558485	-3.08247	0.00205288	0.0650362	0.620826
ENSOARG00020021560	161.69	1.68071	0.586181	2.86722	0.00414098	0.0650362	1.25818
ENSOARG00020023456	107.67	1.87597	0.641505	2.92433	0.00345194	0.0650362	1.05065
ENSOARG00020026291	1620.23	-1.56419	0.551709	-2.83518	0.00458002	0.0650362	1.38744
ENSOARG00020009547	211.472	1.96578	0.67905	2.89489	0.00379293	0.0651872	1.14286
ENSOARG00020005876	103.349	2.27848	0.782082	2.91335	0.00357574	0.0652176	1.07549
ENSOARG00020015875	1296.58	1.38324	0.461262	2.99882	0.00271024	0.0654415	0.811298
ENSOARG00020006010	151.911	1.89879	0.666493	2.84893	0.00438664	0.0655588	1.3073
ENSOARG00020021102	161.762	1.90915	0.671074	2.84492	0.00444221	0.0655588	1.32479
ENSOARG00020011987	116.738	-1.71851	0.613656	-2.80045	0.00510317	0.0656472	1.51551
ENSOARG00020013016	13.5284	5.29133	1.70736	3.09913	0.00194087	0.0656472	0.576109
ENSOARG00020023424	430.8	-1.41025	0.493322	-2.85868	0.00425402	0.0657975	1.25818
ENSOARG00020000046	70.9609	-2.21898	0.766996	-2.89308	0.00381488	0.0660385	1.11766
ENSOARG00020004322	94.0838	2.60137	0.895512	2.9049	0.00367371	0.0660385	1.07549
ENSOARG00020011198	4649.47	-1.41132	0.494065	-2.85654	0.00428281	0.0660385	1.25874
ENSOARG00020017893	84.9877	-1.72307	0.592863	-2.90635	0.00365672	0.0660385	1.07549
ENSOARG00020019222	163.342	1.81647	0.636039	2.85592	0.00429128	0.0660385	1.25818
ENSOARG00020023015	37.2827	2.78097	0.981985	2.83199	0.00462589	0.0663797	1.34552
ENSOARG00020009205	74566.9	-1.34274	0.450997	-2.97728	0.00290823	0.0665467	0.841578
ENSOARG00020012393	311.52	-1.97506	0.708986	-2.78575	0.00534042	0.0665467	1.54722
ENSOARG00020024424	530.802	-1.40036	0.491344	-2.85005	0.00437117	0.0667291	1.25818
ENSOARG00020025938	1922.04	1.44102	0.511166	2.81908	0.00481616	0.0667291	1.38744
ENSOARG00020001367	78.7377	2.15605	0.749083	2.87825	0.00399889	0.0668556	1.14286
ENSOARG00020005980	469.32	2.12953	0.734414	2.89963	0.00373597	0.0668556	1.06694
ENSOARG00020008123	450.25	-1.63499	0.573876	-2.84903	0.00438523	0.0668556	1.25818
ENSOARG00020013237	37.9343	4.00265	1.32518	3.02046	0.0025239	0.0668556	0.722675
ENSOARG00020020918	82.9829	2.22211	0.774278	2.86991	0.00410588	0.0668556	1.17044
ENSOARG00020022522	1510.88	-1.61168	0.57034	-2.82583	0.00471579	0.0668556	1.34536
ENSOARG00020003178	421.143	-1.83896	0.634657	-2.89757	0.00376072	0.0670419	1.06694
ENSOARG00020006148	85.7055	2.50435	0.873138	2.86821	0.00412795	0.0670419	1.17044
ENSOARG00020002116	590.891	-1.57481	0.557905	-2.82273	0.00476164	0.0670815	1.34536
ENSOARG00020004157	4825.1	-1.85897	0.62594	-2.96988	0.00297919	0.0670815	0.841578
ENSOARG00020015908	324.291	1.70857	0.589979	2.89598	0.00377972	0.0670815	1.06694
ENSOARG00020005213	513.53	1.95231	0.692619	2.81874	0.00482126	0.0676462	1.34778
ENSOARG00020010773	283.951	-1.89608	0.635971	-2.98139	0.00286944	0.0676462	0.800144
ENSOARG00020020728	12584.6	-1.41797	0.5119	-2.77002	0.00560533	0.0676462	1.56456
ENSOARG00020003866	215.217	2.04103	0.721904	2.82729	0.00469437	0.0676491	1.3073
ENSOARG00020009436	671.913	1.54043	0.546916	2.81658	0.00485383	0.0678156	1.34536
ENSOARG00020020102	1710.44	1.71544	0.609073	2.81648	0.0048553	0.0678156	1.34536
ENSOARG00020016411	106.276	2.01637	0.697398	2.89127	0.00383685	0.0685357	1.05065
ENSOARG00020023190	70.8081	2.0959	0.729967	2.87123	0.00408882	0.0685699	1.11766
ENSOARG00020013127	241.714	-1.4252	0.506292	-2.81498	0.00487805	0.068928	1.32479
ENSOARG00020026164	61.4761	2.11993	0.705701	3.00401	0.00266446	0.0689303	0.722675
ENSOARG00020022145	72.5669	-2.03769	0.707664	-2.87946	0.00398352	0.0691603	1.07549
ENSOARG00020009131	90.4356	2.22562	0.804681	2.76584	0.00567757	0.0698633	1.51551
ENSOARG00020005985	1198.54	1.26726	0.452197	2.80245	0.00507166	0.0699269	1.34778
ENSOARG00020008771	39.3547	2.37031	0.830306	2.85475	0.0043071	0.0699269	1.14286
ENSOARG00020019153	1789.01	-2.02455	0.722248	-2.80313	0.00506098	0.0699269	1.34778
ENSOARG00020021941	17.9271	-3.22734	1.05258	-3.06611	0.00216864	0.0699269	0.576109
ENSOARG00020024433	33.8639	-3.61627	1.26697	-2.85427	0.00431364	0.0699452	1.14286
ENSOARG00020012892	153.086	1.92845	0.675854	2.85335	0.00432611	0.0700594	1.14286
ENSOARG00020022073	430.114	-1.8662	0.629543	-2.96437	0.00303301	0.0700686	0.800144
ENSOARG00020000333	72.3254	2.46535	0.867268	2.84266	0.00447385	0.070304	1.17044
ENSOARG00020004848	124.939	2.24402	0.813136	2.75972	0.00578517	0.070304	1.51551
ENSOARG00020011566	13871.6	-1.49459	0.543601	-2.74943	0.00596992	0.070304	1.56456
ENSOARG00020021024	2409.5	-2.52632	0.932665	-2.70871	0.0067545	0.070304	1.76929
ENSOARG00020014689	98276.6	-1.18094	0.436168	-2.70753	0.00677865	0.0703802	1.76929
ENSOARG00020014807	1240.21	-2.11737	0.733175	-2.88795	0.00387764	0.0705469	1.00764
ENSOARG00020015806	32.9897	-2.59892	0.910289	-2.85506	0.00430292	0.0705469	1.11766
ENSOARG00020006776	188.418	1.84834	0.660075	2.8002	0.00510704	0.0705521	1.32479
ENSOARG00020013466	3655.93	1.37584	0.488948	2.81388	0.00489473	0.0710789	1.25874
ENSOARG00020021401	11.0553	4.98025	1.63004	3.05529	0.00224846	0.0712508	0.576109
ENSOARG00020003835	167.769	1.4759	0.525031	2.81107	0.00493767	0.0715571	1.25818
ENSOARG00020000194	2358.71	-1.31633	0.481241	-2.73528	0.00623276	0.0732753	1.54903
ENSOARG00020005620	223.593	-2.1399	0.718214	-2.97947	0.00288744	0.073358	0.710965
ENSOARG00020012463	265.315	-1.64657	0.552428	-2.98062	0.00287669	0.073358	0.710965
ENSOARG00020016596	666.674	-1.48796	0.531437	-2.79989	0.005112	0.073358	1.25818
ENSOARG00020019029	1472.18	-1.55048	0.558029	-2.77849	0.00546127	0.073358	1.34536
ENSOARG00020021914	1319.8	1.97633	0.688262	2.87148	0.00408549	0.073358	1.00764
ENSOARG00020022120	140.734	-1.57848	0.553607	-2.85127	0.00435449	0.073358	1.07549
ENSOARG00020023335	884.675	-1.42108	0.511553	-2.77798	0.00546981	0.073358	1.34778
ENSOARG00020019633	208.827	-2.03387	0.718751	-2.82973	0.00465868	0.0735084	1.14286
ENSOARG00020001049	92.6134	2.42109	0.859316	2.81746	0.00484055	0.0744875	1.17044
ENSOARG00020001658	57.5028	2.65343	0.930182	2.85259	0.0043364	0.0751689	1.0365
ENSOARG00020017182	3567.54	-1.54995	0.531127	-2.91822	0.00352032	0.0751689	0.841578
ENSOARG00020016945	74.3953	2.11368	0.744183	2.84028	0.00450745	0.07521	1.07549
ENSOARG00020004233	987.126	-1.49702	0.543123	-2.75632	0.00584561	0.0753823	1.38744
ENSOARG00020011626	342.955	2.34703	0.841852	2.78794	0.0053045	0.0753823	1.25818
ENSOARG00020022165	137.502	1.85517	0.65804	2.81923	0.00481386	0.0753823	1.14286
ENSOARG00020005296	130.835	1.73502	0.615924	2.81694	0.00484831	0.0757595	1.14286
ENSOARG00020014158	2848.43	2.20072	0.810042	2.7168	0.00659169	0.075902	1.54903
ENSOARG00020021935	623.094	-1.35765	0.491699	-2.76113	0.00576013	0.0761387	1.34778
ENSOARG00020011291	459.819	1.77293	0.606029	2.92549	0.00343912	0.0763875	0.800144
ENSOARG00020025547	138.076	-2.79202	0.992522	-2.81306	0.0049073	0.0763875	1.14286
ENSOARG00020023729	441.304	-1.32926	0.468997	-2.83425	0.00459332	0.0764198	1.06694
ENSOARG00020013445	2745.17	-1.34196	0.461448	-2.90816	0.00363561	0.0765916	0.841578
ENSOARG00020002748	49625.8	-1.26307	0.455913	-2.77041	0.00559856	0.0787619	1.25874
ENSOARG00020008061	98.2361	2.15461	0.771397	2.79313	0.00522002	0.0788823	1.17044
ENSOARG00020013814	192.381	2.01632	0.720813	2.79729	0.00515334	0.0796366	1.14286
ENSOARG00020015735	65.599	2.83982	1.00404	2.8284	0.00467808	0.0796366	1.0365
ENSOARG00020006428	110.91	1.83544	0.67921	2.70232	0.00688575	0.0799822	1.51551
ENSOARG00020007664	2115.15	-1.47754	0.534899	-2.76228	0.0057399	0.0799822	1.25874
ENSOARG00020012536	37652.6	-1.26536	0.458035	-2.76259	0.00573451	0.0799822	1.25874
ENSOARG00020023368	56.6153	2.20453	0.80414	2.74148	0.00611637	0.0799822	1.34552
ENSOARG00020025226	95.3913	2.10088	0.751847	2.79429	0.00520143	0.0799822	1.14286
ENSOARG00020012823	2302.65	-1.30053	0.471033	-2.76101	0.00576235	0.0801523	1.25874
ENSOARG00020022922	2567.44	-1.23723	0.448141	-2.76081	0.00576579	0.0801523	1.25874
ENSOARG00020024928	32.7162	-2.22756	0.795884	-2.79885	0.00512853	0.0801976	1.11766
ENSOARG00020022219	58805.9	-1.35127	0.468193	-2.88614	0.00389994	0.0808962	0.841578
ENSOARG00020022678	806.654	-1.86663	0.677276	-2.75608	0.00584983	0.0809906	1.25818
ENSOARG00020024180	115.876	1.84148	0.683401	2.69458	0.00704782	0.0809906	1.51551
ENSOARG00020025222	879.508	-1.42623	0.478893	-2.97818	0.00289969	0.0812469	0.620826
ENSOARG00020006509	17.016	4.27132	1.38181	3.09111	0.0019941	0.0815109	0.425055
ENSOARG00020004782	300.323	1.89011	0.690912	2.73568	0.00622515	0.0815467	1.32479
ENSOARG00020002394	358.094	1.68971	0.583276	2.89693	0.00376833	0.0816344	0.800144
ENSOARG00020026000	49.961	2.15938	0.776168	2.7821	0.00540078	0.0818171	1.14286
ENSOARG00020000901	113.277	-1.73321	0.644632	-2.68867	0.00717368	0.0818571	1.51551
ENSOARG00020022963	159.791	-2.53301	0.927771	-2.73021	0.00632933	0.082523	1.32479
ENSOARG00020023050	19.9149	4.22065	1.38819	3.04039	0.00236274	0.0828024	0.492299
ENSOARG00020015414	52.2772	2.24493	0.824399	2.72311	0.00646704	0.0828256	1.34552
ENSOARG00020012041	327.027	-1.38328	0.494331	-2.79829	0.00513735	0.0828778	1.06694
ENSOARG00020009970	944.544	-1.33616	0.47462	-2.81523	0.00487429	0.0829712	1.00764
ENSOARG00020012225	65.4315	2.35998	0.848296	2.78203	0.00540207	0.0829712	1.11766
ENSOARG00020012786	95.5231	1.83343	0.660658	2.77516	0.00551746	0.0829712	1.14286
ENSOARG00020001219	1483.51	1.66333	0.614338	2.70752	0.00677873	0.083511	1.38744
ENSOARG00020011411	1625.74	-1.60285	0.589629	-2.7184	0.00655993	0.083511	1.34536
ENSOARG00020025533	834.41	-1.53256	0.559346	-2.73992	0.00614544	0.083511	1.25818
ENSOARG00020016281	942.24	-1.37304	0.488418	-2.8112	0.00493565	0.0836268	1.00764
ENSOARG00020017864	1068	1.67087	0.580322	2.87921	0.00398674	0.0837998	0.811298
ENSOARG00020006324	11.533	5.88891	1.94254	3.03155	0.00243304	0.0841503	0.492299
ENSOARG00020022501	55.4388	2.28422	0.784019	2.91347	0.00357434	0.0841503	0.722675
ENSOARG00020000170	32.0072	3.40478	1.16939	2.91159	0.00359599	0.0845623	0.722675
ENSOARG00020012813	34.4936	2.68431	0.922233	2.91066	0.00360668	0.0847162	0.722675
ENSOARG00020021272	4328.96	-1.29236	0.48603	-2.65902	0.00783692	0.0849288	1.56456
ENSOARG00020024558	39.924	2.56413	0.917664	2.7942	0.00520287	0.0850114	1.0365
ENSOARG00020011207	121.242	-1.7678	0.634125	-2.78777	0.00530718	0.08545	1.05065
ENSOARG00020018547	1719.99	-2.29203	0.847086	-2.70578	0.00681445	0.0855718	1.34536
ENSOARG00020021312	277.462	1.94445	0.717359	2.71057	0.00671687	0.0855718	1.32479
ENSOARG00020021136	195.286	-1.53402	0.562619	-2.72657	0.00639955	0.0857143	1.25818
ENSOARG00020021842	2735.41	-1.39462	0.511565	-2.72618	0.00640726	0.0857143	1.25874
ENSOARG00020017162	255.057	-2.12584	0.771087	-2.75694	0.00583445	0.0858673	1.14286
ENSOARG00020001199	389.68	1.75609	0.632498	2.77644	0.00549574	0.0863144	1.06694
ENSOARG00020001255	46.5285	2.23046	0.801036	2.78447	0.00536147	0.0863144	1.0365
ENSOARG00020006739	8.13354	-5.61432	1.89041	-2.96989	0.00297903	0.0863144	0.576109
ENSOARG00020011945	993.778	-1.33604	0.494901	-2.69962	0.00694196	0.0863144	1.34536
ENSOARG00020014962	23.2868	-2.61409	0.881056	-2.967	0.00300723	0.0863144	0.582037
ENSOARG00020017646	30.5197	-2.26316	0.812714	-2.78469	0.00535787	0.0863144	1.0365
ENSOARG00020021652	45841.4	-1.1887	0.448842	-2.64836	0.00808823	0.0863144	1.56456
ENSOARG00020001461	1244.52	-1.36676	0.50667	-2.69753	0.00698555	0.0865446	1.34536
ENSOARG00020003395	135.092	-1.68497	0.614813	-2.74062	0.00613241	0.0872309	1.17044
ENSOARG00020024353	103.651	1.9293	0.704064	2.74024	0.00613942	0.0872322	1.17044
ENSOARG00020009248	183.435	2.08874	0.760516	2.74647	0.00602397	0.0875583	1.14286
ENSOARG00020023437	478.472	1.69818	0.593692	2.86037	0.00423147	0.0877491	0.800144
ENSOARG00020026131	91.9212	2.2341	0.816217	2.73714	0.0061976	0.0877621	1.17044
ENSOARG00020017607	233112	-1.43473	0.543303	-2.64076	0.00827213	0.0884101	1.54903
ENSOARG00020001691	75.9103	1.96899	0.720812	2.73162	0.0063023	0.0886211	1.17044
ENSOARG00020005921	18340.2	-1.30031	0.493416	-2.63533	0.00840563	0.0886211	1.56456
ENSOARG00020011561	1266.59	1.67611	0.624172	2.68533	0.0072459	0.0886211	1.34536
ENSOARG00020017159	359.959	1.69518	0.62605	2.70775	0.0067742	0.0886211	1.25818
ENSOARG00020017300	195.115	-1.39345	0.514525	-2.70822	0.00676455	0.0886211	1.25818
ENSOARG00020023982	218.491	1.57946	0.586134	2.69471	0.00704504	0.0886211	1.3073
ENSOARG00020001137	254.22	1.68589	0.626017	2.69304	0.00708043	0.0887694	1.3073
ENSOARG00020024440	32.3029	2.13659	0.79608	2.6839	0.00727698	0.0887694	1.34552
ENSOARG00020026209	481.294	-1.31015	0.495101	-2.64623	0.00813951	0.0887694	1.50327
ENSOARG00020004693	35.9118	2.13089	0.794285	2.68278	0.00730124	0.0888391	1.34552
ENSOARG00020011858	96.4336	1.91011	0.691199	2.76347	0.00571902	0.0890184	1.05065
ENSOARG00020018485	27.1289	2.70279	0.916186	2.95004	0.00317733	0.0891755	0.582037
ENSOARG00020000399	63.2098	2.42949	0.843379	2.88066	0.00396844	0.0893082	0.722675
ENSOARG00020000864	1415.95	-1.38652	0.499756	-2.77438	0.00553063	0.0893082	1.00764
ENSOARG00020010961	158.755	-1.93461	0.720562	-2.68486	0.00725608	0.0893082	1.32479
ENSOARG00020019506	78.0895	1.71173	0.628	2.72569	0.00641665	0.0893082	1.17044
ENSOARG00020001142	731.608	1.60279	0.607125	2.63997	0.00829128	0.0896023	1.50327
ENSOARG00020003514	92.8129	2.19958	0.797638	2.75762	0.00582237	0.0899292	1.05065
ENSOARG00020014218	2074.35	-1.24679	0.474616	-2.62694	0.00861577	0.0901602	1.54903
ENSOARG00020018371	52.8229	-2.92662	1.09502	-2.67265	0.00752538	0.0905613	1.34552
ENSOARG00020012687	109.322	1.59657	0.579721	2.75403	0.00588665	0.0905768	1.05065
ENSOARG00020013429	52952.9	-1.32441	0.468705	-2.82568	0.00471803	0.0905768	0.841578
ENSOARG00020003420	169.585	2.30662	0.860704	2.67993	0.00736382	0.0908089	1.3073
ENSOARG00020006220	92.0003	2.63023	0.955596	2.75245	0.00591508	0.0908089	1.05065
ENSOARG00020019655	354.087	1.96279	0.729081	2.69214	0.00709958	0.090869	1.25818
ENSOARG00020017150	325.182	-1.4426	0.508429	-2.83738	0.00454861	0.0914457	0.800144
ENSOARG00020017421	97.53	-1.98116	0.72282	-2.74088	0.00612756	0.0915507	1.07549
ENSOARG00020020312	21788.4	-1.3255	0.515261	-2.57248	0.0100973	0.0916038	1.76929
ENSOARG00020003588	247.82	1.61928	0.596273	2.71567	0.0066142	0.0926925	1.14286
ENSOARG00020017867	627.451	1.47	0.55245	2.66086	0.00779406	0.0926925	1.34778
ENSOARG00020007452	940.199	-1.58555	0.575522	-2.75498	0.00586948	0.0930921	1.00764
ENSOARG00020007610	492.62	1.4733	0.554017	2.6593	0.0078303	0.0930921	1.34536
ENSOARG00020001205	411.797	-1.40109	0.495596	-2.82708	0.0046975	0.0935211	0.800144
ENSOARG00020002198	1111.9	1.63163	0.592784	2.75248	0.00591459	0.0935211	1.00764
ENSOARG00020005189	100.715	1.57335	0.580334	2.71111	0.00670577	0.0935211	1.14286
ENSOARG00020023612	136.446	1.5901	0.588572	2.70163	0.00690009	0.0938098	1.17044
ENSOARG00020001330	9259.82	-1.3008	0.499356	-2.60495	0.00918864	0.0941667	1.54903
ENSOARG00020004572	20989.9	-1.28753	0.503238	-2.55849	0.0105128	0.0941667	1.76929
ENSOARG00020008254	714.357	1.58021	0.604323	2.61484	0.00892687	0.0941667	1.50327
ENSOARG00020008893	52.7291	2.07218	0.763444	2.71425	0.00664257	0.0941667	1.11766
ENSOARG00020021121	11.5512	-4.12665	1.41183	-2.92291	0.00346773	0.0942975	0.582037
ENSOARG00020006493	141.549	-1.48499	0.519316	-2.85951	0.00424301	0.0943551	0.710965
ENSOARG00020000681	32.0575	2.47861	0.868558	2.85371	0.00432118	0.0944353	0.722675
ENSOARG00020020902	54.4052	1.81644	0.664163	2.73493	0.00623943	0.0949697	1.0365
ENSOARG00020003280	288.776	-1.55146	0.59714	-2.59816	0.00937261	0.0953991	1.54722
ENSOARG00020023381	307.034	1.29751	0.499421	2.59803	0.00937593	0.0953991	1.54722
ENSOARG00020025329	2281.48	-1.20417	0.46363	-2.59726	0.00939702	0.0954002	1.54903
ENSOARG00020001813	332.652	1.49267	0.559943	2.66576	0.00768146	0.0959084	1.25818
ENSOARG00020024236	623.973	1.66626	0.625399	2.66431	0.0077147	0.0962209	1.25818
ENSOARG00020014296	297.269	1.91412	0.738323	2.59253	0.0095273	0.0965272	1.54722
ENSOARG00020018625	507.335	-1.36495	0.517384	-2.63817	0.00833549	0.0970204	1.34536
ENSOARG00020005303	491.78	1.49442	0.566986	2.63572	0.0083959	0.0975847	1.34536
ENSOARG00020009711	3258.16	-1.28453	0.483271	-2.65799	0.00786083	0.0975847	1.25874
ENSOARG00020001033	2771	-1.5785	0.565808	-2.78981	0.00527394	0.0978206	0.841578
ENSOARG00020006843	76309.4	-1.26595	0.498836	-2.53781	0.0111547	0.0980435	1.76929
ENSOARG00020013114	617.866	1.79374	0.681486	2.6321	0.008486	0.0980435	1.34536
ENSOARG00020015207	75.5029	-1.99911	0.746392	-2.67837	0.0073982	0.0980435	1.17044
ENSOARG00020017576	3439.22	-2.19105	0.82539	-2.65456	0.00794112	0.0980435	1.25874
ENSOARG00020021600	165.277	1.80697	0.635659	2.84268	0.00447362	0.0980435	0.710965
ENSOARG00020023422	70.3623	2.64291	0.972025	2.71897	0.00654852	0.0980435	1.0365
ENSOARG00020004315	452.279	2.49522	0.890441	2.80223	0.005075	0.0981622	0.800144
ENSOARG00020009251	37.1753	-2.4468	0.911325	-2.68489	0.00725547	0.0981622	1.14286
ENSOARG00020018213	113.577	2.61919	0.968204	2.70521	0.0068262	0.0981622	1.07549
ENSOARG00020014854	9.44524	-4.8826	1.62788	-2.99937	0.00270541	0.0983079	0.425055
ENSOARG00020021407	52.5969	2.27269	0.844508	2.69114	0.00712091	0.0983079	1.11766
ENSOARG00020017721	183.045	-1.92075	0.676901	-2.83757	0.00454581	0.0985536	0.710965
ENSOARG00020001008	183.507	2.11912	0.747172	2.83619	0.00456552	0.0988777	0.710965
ENSOARG00020016555	131.035	-2.10522	0.785429	-2.68035	0.00735458	0.0989843	1.14286
ENSOARG00020021193	95130.6	-1.24096	0.446419	-2.7798	0.00543925	0.0993104	0.841578
ENSOARG00020004341	38573.4	-1.26969	0.493156	-2.57462	0.0100349	0.0994381	1.54903
ENSOARG00020012626	884.146	-1.45675	0.550902	-2.6443	0.00818594	0.0997635	1.25818
ENSOARG00020019647	2270.16	-1.34288	0.483579	-2.77697	0.00548689	0.0998681	0.841578
ENSOARG00020005147	672.675	-1.51917	0.588991	-2.57927	0.00990092	0.100782	1.50327
ENSOARG00020025606	5765.53	-1.6673	0.632167	-2.63743	0.0083536	0.101445	1.25874
ENSOARG00020016161	386.485	2.56934	0.922128	2.78632	0.00533109	0.101635	0.800144
ENSOARG00020017512	572.854	1.30977	0.501167	2.61343	0.00896372	0.101635	1.34536
ENSOARG00020020162	55.1482	2.204	0.843599	2.61262	0.00898511	0.101761	1.34552
ENSOARG00020025148	128.938	-1.43377	0.539358	-2.6583	0.0078537	0.102147	1.17044
ENSOARG00020022358	4740.53	-1.35247	0.528679	-2.55821	0.0105211	0.102158	1.56456
ENSOARG00020023956	32.4859	3.63518	1.2908	2.81621	0.00485934	0.102158	0.722675
ENSOARG00020006392	354.92	-1.3714	0.535516	-2.5609	0.0104402	0.102298	1.54722
ENSOARG00020025978	2959.61	1.32837	0.518773	2.56061	0.0104489	0.102298	1.54903
ENSOARG00020012764	22277.6	-1.17068	0.457327	-2.55983	0.0104724	0.102388	1.54903
ENSOARG00020009525	1109.17	-1.27547	0.489222	-2.60713	0.00913041	0.102492	1.34778
ENSOARG00020018081	137.658	1.88518	0.708272	2.66166	0.00777573	0.10283	1.14286
ENSOARG00020005323	155.274	1.63996	0.623937	2.62841	0.00857856	0.102943	1.25818
ENSOARG00020006720	220.924	1.65876	0.62359	2.66001	0.00781384	0.103122	1.14286
ENSOARG00020000741	25541.8	-1.24198	0.486999	-2.55027	0.0107639	0.10358	1.56456
ENSOARG00020004386	377.788	-1.34855	0.513682	-2.62527	0.00865808	0.10358	1.25818
ENSOARG00020006453	3318.11	-1.11161	0.436203	-2.54839	0.0108222	0.10391	1.56456
ENSOARG00020019864	2442.29	-1.36685	0.545612	-2.50518	0.012239	0.10391	1.76929
ENSOARG00020023861	4654.1	-1.32148	0.479534	-2.75576	0.00585551	0.104303	0.841578
ENSOARG00020024165	1170.69	-1.31574	0.508338	-2.58833	0.0096443	0.104303	1.38744
ENSOARG00020009403	168.05	-1.42554	0.537539	-2.65197	0.00800245	0.104847	1.14286
ENSOARG00020021001	5333.21	-1.40902	0.538022	-2.61889	0.00882159	0.104847	1.25874
ENSOARG00020019307	37302.9	-1.2273	0.481933	-2.54661	0.0108775	0.104948	1.54903
ENSOARG00020005592	1465.91	-1.47546	0.568675	-2.59456	0.00947128	0.105108	1.34536
ENSOARG00020021913	1430.29	-1.26503	0.489747	-2.58304	0.00979354	0.105281	1.38744
ENSOARG00020008756	389.158	1.63418	0.642187	2.54471	0.0109369	0.105324	1.54722
ENSOARG00020012554	82.6514	1.81934	0.681738	2.66867	0.00761516	0.105396	1.07549
ENSOARG00020002812	1282.09	-1.30942	0.505347	-2.59113	0.0095661	0.105462	1.34778
ENSOARG00020025263	1128.62	-1.63433	0.591901	-2.76115	0.00575974	0.105462	0.811298
ENSOARG00020003179	31.4814	-2.23986	0.846473	-2.64611	0.00814242	0.105517	1.14286
ENSOARG00020004077	717.398	-1.48225	0.572062	-2.59106	0.00956797	0.105517	1.34536
ENSOARG00020006406	352.641	1.33667	0.500826	2.66894	0.00760914	0.105517	1.06694
ENSOARG00020020980	57.1685	-1.77484	0.670797	-2.64587	0.00814807	0.105517	1.14286
ENSOARG00020020026	216.952	2.14719	0.825964	2.59962	0.00933277	0.105518	1.3073
ENSOARG00020019149	268.308	1.55694	0.600057	2.59465	0.00946877	0.105537	1.32479
ENSOARG00020025761	262.72	1.53663	0.548602	2.801	0.0050945	0.105594	0.710965
ENSOARG00020025952	129.53	1.72851	0.646767	2.67254	0.00752789	0.105594	1.05065
ENSOARG00020006932	4983.16	-1.47609	0.565369	-2.61085	0.0090317	0.10563	1.25874
ENSOARG00020002412	1687.26	-1.34665	0.488422	-2.75714	0.00583097	0.105701	0.811298
ENSOARG00020013198	555.419	-1.59641	0.561559	-2.84282	0.00447159	0.105823	0.620826
ENSOARG00020008811	195.122	1.67117	0.643926	2.59528	0.00945153	0.106116	1.3073
ENSOARG00020021767	138.942	-1.44106	0.56666	-2.54308	0.0109879	0.106312	1.51551
ENSOARG00020021478	17516.2	-1.29312	0.510641	-2.53236	0.0113299	0.107142	1.54903
ENSOARG00020005339	894.584	-1.13236	0.445688	-2.54071	0.0110627	0.107692	1.50327
ENSOARG00020020968	90.6782	1.69023	0.641597	2.6344	0.00842849	0.107817	1.14286
ENSOARG00020001839	3759.96	-1.20743	0.477541	-2.52844	0.0114572	0.108024	1.54903
ENSOARG00020023555	1371.08	1.4029	0.544671	2.57569	0.010004	0.1083	1.34778
ENSOARG00020022538	53.0083	2.49029	0.943713	2.63882	0.00831941	0.108498	1.11766
ENSOARG00020020982	1487.15	-1.18946	0.46213	-2.57387	0.0100567	0.108655	1.34778
ENSOARG00020016791	42252.6	-1.19919	0.475952	-2.51955	0.0117505	0.109149	1.56456
ENSOARG00020024862	324.823	-1.46535	0.56849	-2.57761	0.00994855	0.109149	1.32479
ENSOARG00020008124	45.2391	2.01462	0.757487	2.65961	0.00782316	0.109503	1.0365
ENSOARG00020013148	220.321	1.44758	0.561997	2.57577	0.0100017	0.109503	1.32479
ENSOARG00020000378	16.8281	3.22754	1.09558	2.94597	0.00321946	0.109752	0.425055
ENSOARG00020021607	15.8404	-3.74143	1.2905	-2.89921	0.00374099	0.110003	0.492299
ENSOARG00020018828	10.1679	3.36257	1.24865	2.69297	0.00708194	0.110036	0.930765
ENSOARG00020022406	11340.9	-1.14618	0.442516	-2.59015	0.00959336	0.110111	1.25874
ENSOARG00020017587	1420.61	2.08303	0.760948	2.73741	0.00619245	0.110167	0.811298
ENSOARG00020008033	1193.59	-1.29847	0.487246	-2.66491	0.00770086	0.110199	1.00764
ENSOARG00020005583	159.612	1.66106	0.646139	2.57075	0.0101478	0.110236	1.32479
ENSOARG00020021480	71.2577	2.09199	0.791687	2.64245	0.00823087	0.110236	1.07549
ENSOARG00020023725	180.515	-2.26663	0.815621	-2.77902	0.00545236	0.110258	0.710965
ENSOARG00020000763	736.071	-1.40018	0.546443	-2.56236	0.0103964	0.110349	1.34536
ENSOARG00020001432	65.4456	-2.53084	0.954005	-2.65286	0.00798133	0.110349	1.0365
ENSOARG00020008890	714.113	1.60213	0.625234	2.56244	0.0103939	0.110349	1.34778
ENSOARG00020012423	567.981	-1.4329	0.559347	-2.56174	0.0104148	0.110349	1.34778
ENSOARG00020020436	142.421	-1.98673	0.758522	-2.61922	0.00881322	0.110349	1.14286
ENSOARG00020022661	774.182	-1.34604	0.525315	-2.56235	0.0103965	0.110349	1.34778
ENSOARG00020024448	396.766	1.33606	0.516423	2.58715	0.00967746	0.110349	1.25818
ENSOARG00020003676	8475.11	-1.12312	0.44704	-2.51234	0.0119932	0.110453	1.54903
ENSOARG00020001028	598.2	2.25296	0.871888	2.584	0.00976619	0.110628	1.25818
ENSOARG00020007651	1034.61	1.55249	0.609046	2.54905	0.0108015	0.110636	1.38744
ENSOARG00020018034	111.283	1.64461	0.652959	2.5187	0.0117788	0.110636	1.51551
ENSOARG00020024142	117.496	1.66044	0.636637	2.60815	0.00910341	0.110636	1.17044
ENSOARG00020003575	774.251	-1.1781	0.460365	-2.55905	0.0104957	0.110759	1.34536
ENSOARG00020002866	796.961	1.6575	0.648397	2.5563	0.0105791	0.11085	1.34778
ENSOARG00020006255	897.833	-1.62743	0.646298	-2.51809	0.0117995	0.11085	1.50327
ENSOARG00020012625	93.5435	-1.78762	0.686059	-2.60563	0.00917056	0.11085	1.17044
ENSOARG00020022783	119.742	-1.51532	0.573328	-2.64303	0.00821675	0.11085	1.05065
ENSOARG00020025118	2887.21	-1.45663	0.59213	-2.45999	0.013894	0.11085	1.76929
ENSOARG00020026228	600.028	-1.72502	0.674584	-2.55715	0.0105532	0.11085	1.34536
ENSOARG00020005541	390.707	-1.60571	0.588018	-2.73071	0.00631974	0.111277	0.800144
ENSOARG00020018298	342.625	2.10754	0.771759	2.73083	0.00631757	0.111277	0.800144
ENSOARG00020009337	1146.74	-1.25432	0.460293	-2.72505	0.0064292	0.111541	0.811298
ENSOARG00020007802	748.652	-1.47052	0.576625	-2.55022	0.0107656	0.112242	1.34778
ENSOARG00020025751	14375.9	1.5576	0.574712	2.71022	0.00672384	0.112242	0.841578
ENSOARG00020023121	54.9682	2.3865	0.864681	2.75998	0.00578044	0.112263	0.722675
ENSOARG00020014611	2399.94	1.59534	0.588847	2.70926	0.00674325	0.112352	0.841578
ENSOARG00020000948	72.7734	-1.77877	0.709809	-2.50599	0.012211	0.112872	1.51551
ENSOARG00020004036	612.809	1.79544	0.716018	2.50753	0.0121577	0.112895	1.50327
ENSOARG00020004679	158.396	-1.50604	0.578435	-2.60365	0.00922373	0.112895	1.14286
ENSOARG00020005097	109.099	2.58152	0.980752	2.63218	0.00848377	0.112895	1.05065
ENSOARG00020016714	249.948	2.03689	0.737571	2.76163	0.00575144	0.112895	0.710965
ENSOARG00020011045	13.8262	3.71875	1.39184	2.67182	0.00754416	0.112901	0.930765
ENSOARG00020026248	662.987	1.51254	0.59408	2.54601	0.0108961	0.112901	1.34536
ENSOARG00020008232	52.3748	3.03553	1.16691	2.60133	0.00928625	0.112967	1.14286
ENSOARG00020010132	169.008	-1.36017	0.533293	-2.55052	0.0107563	0.112967	1.32479
ENSOARG00020008950	2149.46	1.53636	0.598382	2.56753	0.0102426	0.113024	1.25874
ENSOARG00020009501	616.244	-1.30917	0.514729	-2.54341	0.0109776	0.113026	1.34778
ENSOARG00020002814	261.774	-1.38283	0.542537	-2.54882	0.0108089	0.113114	1.32479
ENSOARG00020022995	358.272	1.74581	0.685041	2.54847	0.0108197	0.11312	1.32479
ENSOARG00020012958	162.19	1.70676	0.665133	2.56605	0.0102865	0.113133	1.25818
ENSOARG00020006407	2478.07	-1.48713	0.59748	-2.489	0.0128105	0.113156	1.56456
ENSOARG00020011622	66.1635	2.97721	1.08178	2.75214	0.00592065	0.113156	0.722675
ENSOARG00020008673	299.429	-1.24298	0.488033	-2.54692	0.0108679	0.1132	1.32479
ENSOARG00020005314	34.7705	-2.24355	0.852782	-2.63086	0.00851682	0.113278	1.0365
ENSOARG00020017531	71.0364	1.78816	0.68686	2.60338	0.00923106	0.11365	1.11766
ENSOARG00020023106	388.336	1.50016	0.552342	2.71601	0.00660744	0.11365	0.800144
ENSOARG00020019693	236.296	1.87084	0.730299	2.56175	0.0104147	0.113796	1.25818
ENSOARG00020023325	695.718	1.32589	0.517941	2.55993	0.0104692	0.114184	1.25818
ENSOARG00020024732	583.598	-1.34346	0.524806	-2.55992	0.0104697	0.114184	1.25818
ENSOARG00020008860	13.4018	3.34626	1.14757	2.91596	0.00354602	0.114368	0.425055
ENSOARG00020002300	1872.39	-1.17583	0.463871	-2.53482	0.0112507	0.114518	1.34536
ENSOARG00020005697	175.761	2.13202	0.775215	2.75023	0.00595543	0.114518	0.710965
ENSOARG00020005895	251.376	1.77858	0.646704	2.75022	0.00595557	0.114518	0.710965
ENSOARG00020020685	1023.44	-1.24538	0.46034	-2.70534	0.00682342	0.114873	0.811298
ENSOARG00020008629	398.905	1.44265	0.564469	2.55576	0.0105957	0.114916	1.25818
ENSOARG00020017328	174.029	1.70268	0.657782	2.58853	0.00963879	0.11498	1.14286
ENSOARG00020007130	25.6077	2.69428	0.925338	2.91167	0.003595	0.11519	0.425055
ENSOARG00020019328	211.282	1.66974	0.645368	2.58726	0.00967421	0.11519	1.14286
ENSOARG00020020969	1883.07	-1.81875	0.721909	-2.51936	0.0117569	0.115205	1.38744
ENSOARG00020023840	3699.73	1.13934	0.459451	2.47979	0.0131461	0.115274	1.54903
ENSOARG00020000475	42.1328	2.15968	0.853942	2.52908	0.0114363	0.115342	1.34552
ENSOARG00020015590	174.302	-1.42694	0.563185	-2.5337	0.0112865	0.115506	1.32479
ENSOARG00020017088	4870.43	-1.51303	0.610576	-2.47804	0.0132106	0.11552	1.54903
ENSOARG00020003921	669.33	1.32349	0.523658	2.5274	0.0114912	0.11559	1.34536
ENSOARG00020002635	808.049	1.47029	0.582156	2.5256	0.01155	0.115665	1.34536
ENSOARG00020005933	2565.72	-1.15571	0.453403	-2.54896	0.0108043	0.115665	1.25874
ENSOARG00020007239	16.3208	-4.41523	1.54308	-2.86132	0.00421882	0.115665	0.492299
ENSOARG00020010467	202.775	-1.60461	0.585227	-2.74185	0.00610938	0.115665	0.710965
ENSOARG00020011629	1054.18	-1.29008	0.491273	-2.62599	0.00863966	0.115665	1.00764
ENSOARG00020016145	53.9889	-1.95829	0.775597	-2.52488	0.0115738	0.115665	1.34552
ENSOARG00020019068	28.0064	3.38244	1.27545	2.65196	0.00800259	0.115665	0.930765
ENSOARG00020001313	1059.87	-1.25103	0.495928	-2.52261	0.0116488	0.1159	1.34536
ENSOARG00020012425	120.479	1.68695	0.680018	2.48074	0.0131109	0.1159	1.51551
ENSOARG00020013020	525.665	-1.30345	0.51173	-2.54715	0.0108607	0.1159	1.25818
ENSOARG00020013495	535.43	1.29706	0.52227	2.4835	0.0130097	0.1159	1.50327
ENSOARG00020016180	3218.74	-1.24076	0.501759	-2.47281	0.0134054	0.1159	1.54903
ENSOARG00020021753	670.678	1.21267	0.481044	2.52092	0.011705	0.116144	1.34778
ENSOARG00020016747	2297.68	-1.47032	0.595904	-2.46737	0.0136109	0.116237	1.56456
ENSOARG00020001108	245.927	1.55001	0.609624	2.54257	0.0110041	0.11634	1.25818
ENSOARG00020002071	453.972	1.70469	0.670657	2.54182	0.0110278	0.11634	1.25818
ENSOARG00020005458	453.202	-1.26319	0.468588	-2.69574	0.00702325	0.11634	0.800144
ENSOARG00020008331	470.624	-1.26328	0.485761	-2.60062	0.00930547	0.11634	1.06694
ENSOARG00020010556	47.6273	2.46281	0.952927	2.58447	0.0097528	0.11634	1.11766
ENSOARG00020014139	284.983	1.58062	0.640494	2.46782	0.0135939	0.11634	1.54722
ENSOARG00020015395	2029.55	-2.06588	0.789139	-2.61789	0.00884754	0.11634	1.00764
ENSOARG00020016963	83.3465	1.74292	0.669392	2.60373	0.00922144	0.11634	1.05065
ENSOARG00020019973	795.303	1.37362	0.554185	2.47864	0.0131884	0.11634	1.50327
ENSOARG00020021132	1116.85	-1.40857	0.523182	-2.69232	0.00709567	0.11634	0.811298
ENSOARG00020008156	849.476	-1.171	0.465765	-2.51414	0.0119322	0.117125	1.34778
ENSOARG00020001143	31387.7	1.30176	0.486851	2.67384	0.00749881	0.117691	0.841578
ENSOARG00020009528	384.396	1.3545	0.534124	2.53593	0.0112148	0.117691	1.25818
ENSOARG00020009553	10811.9	-1.35883	0.535917	-2.53552	0.0112279	0.117691	1.25874
ENSOARG00020010103	238.336	1.52861	0.607373	2.51675	0.0118442	0.117856	1.32479
ENSOARG00020022688	10640.8	1.46719	0.596362	2.46023	0.0138849	0.118056	1.54903
ENSOARG00020013172	73.2236	1.60796	0.628656	2.55777	0.0105344	0.11829	1.17044
ENSOARG00020013455	20977.3	-1.36415	0.510865	-2.67028	0.00757881	0.11829	0.841578
ENSOARG00020020838	1322.13	-1.25154	0.479543	-2.60985	0.00905815	0.11829	1.00764
ENSOARG00020005151	74.8984	1.97323	0.800407	2.46529	0.0136904	0.118342	1.51551
ENSOARG00020009104	133.916	1.97942	0.76305	2.5941	0.00948401	0.118342	1.05065
ENSOARG00020011227	10.1007	3.80893	1.44532	2.63536	0.00840478	0.118342	0.930765
ENSOARG00020002376	8.97009	4.10899	1.55985	2.63422	0.00843306	0.118483	0.930765
ENSOARG00020008176	50.4394	2.31867	0.852743	2.71908	0.00654641	0.118483	0.722675
ENSOARG00020002311	55.8529	2.14293	0.825416	2.59619	0.00942652	0.118511	1.0365
ENSOARG00020006784	1533.3	-1.28999	0.495006	-2.606	0.00916052	0.118511	1.00764
ENSOARG00020007809	1445.56	1.37769	0.549874	2.50547	0.012229	0.118511	1.34778
ENSOARG00020025709	104.935	2.04774	0.799107	2.56254	0.010391	0.118511	1.14286
ENSOARG00020001022	174.207	1.31204	0.522327	2.51191	0.0120079	0.118661	1.3073
ENSOARG00020003723	207.538	1.76006	0.701573	2.50873	0.0121167	0.118661	1.32479
ENSOARG00020004040	14.908	-4.32011	1.55074	-2.78584	0.00533895	0.118661	0.582037
ENSOARG00020005443	229.727	-1.51541	0.604053	-2.50874	0.0121163	0.118661	1.32479
ENSOARG00020007247	4782.43	1.1712	0.439563	2.66446	0.00771109	0.118661	0.841578
ENSOARG00020008340	341.933	-1.53618	0.612689	-2.50728	0.0121664	0.118661	1.32479
ENSOARG00020012811	656.157	-1.31761	0.526746	-2.50141	0.0123701	0.118661	1.34536
ENSOARG00020013612	27.4364	2.67883	0.943592	2.83897	0.00452593	0.118661	0.492299
ENSOARG00020015526	12.1896	3.90747	1.35334	2.88729	0.00388582	0.118661	0.425055
ENSOARG00020017535	100.604	-2.2948	0.932632	-2.46057	0.0138717	0.118661	1.51551
ENSOARG00020019401	233.891	1.66103	0.657296	2.52707	0.0115018	0.118661	1.25818
ENSOARG00020011459	1071.57	1.25267	0.468334	2.67473	0.00747891	0.118807	0.811298
ENSOARG00020013931	171.514	2.00814	0.801395	2.50581	0.0122172	0.118807	1.32479
ENSOARG00020000390	402.359	1.67892	0.62699	2.67774	0.00741196	0.11882	0.800144
ENSOARG00020006005	363.459	1.93984	0.751906	2.5799	0.00988296	0.11882	1.06694
ENSOARG00020007863	37.1514	2.78031	1.07337	2.59026	0.00959045	0.11882	1.0365
ENSOARG00020012669	9.9652	4.9152	1.8705	2.62774	0.0085954	0.11882	0.930765
ENSOARG00020023901	1381.39	-1.11587	0.44664	-2.49836	0.0124771	0.11882	1.34778
ENSOARG00020000132	27.4183	-2.69562	0.968846	-2.7823	0.00539757	0.118865	0.576109
ENSOARG00020001284	182.891	-5.23806	2.09258	-2.50316	0.0123089	0.118865	1.32479
ENSOARG00020002994	2788.93	-1.3305	0.544099	-2.44532	0.0144725	0.118865	1.54903
ENSOARG00020003765	264.112	1.72826	0.689927	2.50498	0.0122457	0.118865	1.3073
ENSOARG00020004228	71.7422	-1.63616	0.643281	-2.54346	0.010976	0.118865	1.17044
ENSOARG00020008085	107.492	1.72342	0.669779	2.57311	0.0100788	0.118865	1.07549
ENSOARG00020009930	4895.62	-1.12312	0.468837	-2.39555	0.0165953	0.118865	1.76929
ENSOARG00020010086	142.679	1.54274	0.61688	2.50087	0.0123889	0.118865	1.32479
ENSOARG00020010514	131.994	1.92977	0.749108	2.57609	0.00999239	0.118865	1.07549
ENSOARG00020012511	316.843	1.54713	0.600559	2.57615	0.00999076	0.118865	1.06694
ENSOARG00020013318	153.429	1.83102	0.72669	2.51967	0.0117465	0.118865	1.25818
ENSOARG00020016047	57.5645	2.08732	0.806772	2.58725	0.00967467	0.118865	1.0365
ENSOARG00020024868	1207.14	-1.19059	0.477103	-2.49545	0.0125796	0.118865	1.34536
ENSOARG00020025968	291.418	-1.24439	0.508886	-2.44532	0.0144725	0.118865	1.54722
ENSOARG00020011245	437.595	-1.70407	0.697509	-2.44308	0.0145626	0.119072	1.54722
ENSOARG00020015022	1807.9	-1.37803	0.555135	-2.48234	0.0130523	0.119072	1.38744
ENSOARG00020009360	1610.04	-1.79277	0.672171	-2.66713	0.00765027	0.11909	0.811298
ENSOARG00020025558	60.046	-2.02079	0.792506	-2.54988	0.0107761	0.11909	1.14286
ENSOARG00020016505	110.695	1.6185	0.636912	2.54116	0.0110485	0.119114	1.17044
ENSOARG00020024975	2280.7	1.09515	0.458158	2.39032	0.0168336	0.119954	1.76929
ENSOARG00020000364	102.049	-1.73207	0.672788	-2.57447	0.0100393	0.12006	1.05065
ENSOARG00020003874	15.4867	3.10107	1.11832	2.77298	0.00555458	0.12006	0.582037
ENSOARG00020005645	6261.21	-1.0693	0.44759	-2.38901	0.0168937	0.12006	1.76929
ENSOARG00020015259	55.858	-1.80894	0.708528	-2.5531	0.0106768	0.12006	1.11766
ENSOARG00020001870	67.8285	1.84323	0.724634	2.54367	0.0109693	0.120128	1.14286
ENSOARG00020011256	60.4441	2.83332	1.04909	2.70075	0.00691839	0.120128	0.722675
ENSOARG00020014412	1986.68	1.20123	0.451458	2.66077	0.00779626	0.120128	0.811298
ENSOARG00020017278	392.651	2.36718	0.88807	2.66553	0.00768665	0.120128	0.800144
ENSOARG00020025507	6708.79	-1.23357	0.465767	-2.64847	0.00808578	0.120128	0.841578
ENSOARG00020026452	23.5941	2.33876	0.894469	2.61469	0.00893091	0.120128	0.930765
ENSOARG00020015963	729.775	-1.53915	0.559866	-2.74914	0.00597527	0.120215	0.620826
ENSOARG00020002946	35.372	2.20769	0.818247	2.69808	0.00697416	0.120435	0.722675
ENSOARG00020003056	98.6519	1.95219	0.761895	2.56228	0.0103986	0.120459	1.07549
ENSOARG00020007928	584.387	-1.37478	0.562539	-2.44389	0.0145298	0.120459	1.50327
ENSOARG00020011283	475.284	1.3186	0.542219	2.43185	0.0150218	0.120778	1.54722
ENSOARG00020019423	101.541	1.4382	0.559851	2.56889	0.0102025	0.120778	1.05065
ENSOARG00020017008	100.834	2.14319	0.846962	2.53045	0.0113917	0.120909	1.17044
ENSOARG00020021309	408.714	1.4799	0.608816	2.43078	0.0150662	0.120909	1.54722
ENSOARG00020010382	418.544	1.97799	0.795696	2.48585	0.0129241	0.12103	1.32479
ENSOARG00020017455	9.41053	-5.83112	2.03487	-2.8656	0.00416225	0.121211	0.425055
ENSOARG00020024035	45.5094	2.00817	0.78107	2.57105	0.0101391	0.121211	1.0365
ENSOARG00020025762	1632.46	-1.15531	0.447732	-2.58036	0.0098697	0.121211	1.00764
ENSOARG00020007320	138.291	1.88304	0.734167	2.56486	0.0103218	0.121473	1.05065
ENSOARG00020014850	632.355	1.47948	0.539713	2.74124	0.00612079	0.121802	0.620826
ENSOARG00020004818	131.184	1.95702	0.772379	2.53375	0.0112849	0.121887	1.14286
ENSOARG00020001650	3395.62	-1.07083	0.442675	-2.41901	0.0155629	0.122582	1.56456
ENSOARG00020005465	81.4322	1.67999	0.691187	2.43059	0.0150743	0.122582	1.51551
ENSOARG00020002881	120.64	-1.44692	0.567092	-2.55148	0.0107268	0.122809	1.07549
ENSOARG00020006358	382.036	1.48971	0.583641	2.55245	0.0106969	0.123241	1.06694
ENSOARG00020019876	807.95	1.44593	0.585338	2.47025	0.0135018	0.123241	1.34778
ENSOARG00020004445	2950.34	-1.13989	0.472051	-2.41476	0.0157456	0.123285	1.56456
ENSOARG00020005824	9.63035	5.62251	2.04051	2.75544	0.00586134	0.123285	0.582037
ENSOARG00020012919	17.103	-2.80098	1.01654	-2.75542	0.00586174	0.123285	0.582037
ENSOARG00020019999	1595.6	1.43967	0.585711	2.458	0.0139715	0.123285	1.38744
ENSOARG00020025075	1458.95	-1.24101	0.502439	-2.46997	0.0135124	0.123285	1.34536
ENSOARG00020004551	17009.6	-1.53045	0.614244	-2.4916	0.0127169	0.123572	1.25874
ENSOARG00020002248	89.5217	-1.75311	0.686916	-2.55215	0.010706	0.124352	1.05065
ENSOARG00020014154	257.2	1.52853	0.569275	2.68504	0.0072521	0.124352	0.710965
ENSOARG00020024517	61.7104	2.24573	0.838055	2.67969	0.00736895	0.124352	0.722675
ENSOARG00020024827	306.095	-1.51073	0.593085	-2.54724	0.010858	0.124352	1.06694
ENSOARG00020009444	170.381	-1.66206	0.671757	-2.4742	0.0133536	0.124423	1.3073
ENSOARG00020013103	1740.01	1.86718	0.707651	2.63857	0.00832576	0.124783	0.811298
ENSOARG00020014623	2717.14	1.49875	0.602918	2.48582	0.0129253	0.124783	1.25874
ENSOARG00020017567	87.2445	-1.72465	0.678654	-2.54128	0.0110448	0.124783	1.07549
ENSOARG00020000902	458.385	-1.4249	0.577736	-2.46636	0.0136494	0.125087	1.32479
ENSOARG00020020475	3054.54	1.09397	0.463641	2.35953	0.0182983	0.125459	1.76929
ENSOARG00020004451	112.668	1.72104	0.712339	2.41604	0.0156901	0.125487	1.51551
ENSOARG00020012170	10227.4	1.23717	0.498655	2.48102	0.0131006	0.126046	1.25874
ENSOARG00020010866	1944.54	1.39551	0.545651	2.55752	0.0105421	0.126601	1.00764
ENSOARG00020014276	39.5275	2.53515	0.94924	2.67071	0.00756901	0.126636	0.722675
ENSOARG00020012156	920.715	1.20875	0.492789	2.45288	0.0141718	0.126824	1.34778
ENSOARG00020017197	403.381	1.64445	0.663745	2.47753	0.0132295	0.126824	1.25818
ENSOARG00020020860	3110.61	1.50118	0.605892	2.47764	0.0132256	0.126824	1.25874
ENSOARG00020002040	858	-1.19306	0.486402	-2.45283	0.0141737	0.126966	1.34536
ENSOARG00020004882	273.853	1.44236	0.582873	2.47457	0.0133397	0.127566	1.25818
ENSOARG00020017051	1217.14	-1.38597	0.542894	-2.55293	0.0106821	0.127566	1.00764
ENSOARG00020012848	43003.3	-1.08272	0.452002	-2.39539	0.0166027	0.127575	1.56456
ENSOARG00020019252	279.451	-1.49318	0.603632	-2.47366	0.0133738	0.127684	1.25818
ENSOARG00020006370	109.754	2.0082	0.804134	2.49734	0.0125128	0.127918	1.17044
ENSOARG00020014377	693.883	-1.28147	0.471948	-2.71528	0.00662199	0.127918	0.620826
ENSOARG00020016283	859.922	-1.33122	0.490225	-2.71552	0.00661715	0.127918	0.620826
ENSOARG00020022863	8.03941	-4.06175	1.57585	-2.57749	0.00995203	0.127918	0.930765
ENSOARG00020026182	1142.83	-1.20346	0.491798	-2.44707	0.0144025	0.127918	1.34778
ENSOARG00020005473	45.2784	-2.54379	0.955385	-2.66258	0.00775441	0.128059	0.722675
ENSOARG00020008513	312.213	1.54446	0.610706	2.52897	0.0114399	0.128059	1.06694
ENSOARG00020011520	384.444	-1.7097	0.650464	-2.62843	0.00857797	0.128059	0.800144
ENSOARG00020015742	234.468	1.39991	0.570181	2.4552	0.0140804	0.128438	1.3073
ENSOARG00020006332	20.861	-2.83032	1.01544	-2.78729	0.00531514	0.128643	0.492299
ENSOARG00020006683	522.55	1.98895	0.814054	2.44327	0.014555	0.128803	1.34536
ENSOARG00020005536	1173.18	-1.26535	0.517986	-2.44282	0.014573	0.128857	1.34536
ENSOARG00020003193	1225.05	1.61121	0.660547	2.4392	0.0147197	0.129614	1.34778
ENSOARG00020025125	294.453	1.27419	0.485933	2.62215	0.00873762	0.129614	0.800144
ENSOARG00020025987	133.233	1.70479	0.682482	2.49792	0.0124924	0.129614	1.14286
ENSOARG00020026429	64.5649	-2.00871	0.804112	-2.49805	0.0124878	0.129614	1.14286
ENSOARG00020013296	180761	1.35343	0.519865	2.60343	0.00922954	0.129938	0.841578
ENSOARG00020014080	2502.83	1.54656	0.648015	2.38661	0.0170047	0.129961	1.54903
ENSOARG00020015836	2234.08	-1.26315	0.529745	-2.38445	0.0171046	0.130515	1.54903
ENSOARG00020022976	11.8458	3.5185	1.2911	2.72519	0.0064265	0.130515	0.582037
ENSOARG00020014823	1546.52	-1.26276	0.483237	-2.61314	0.00897158	0.130601	0.811298
ENSOARG00020000376	65.1598	2.07062	0.851037	2.43306	0.0149718	0.131017	1.34552
ENSOARG00020008163	551.505	-1.16002	0.472114	-2.45707	0.0140074	0.131017	1.25818
ENSOARG00020017929	392.474	-1.38598	0.563946	-2.45765	0.0139849	0.131017	1.25818
ENSOARG00020018440	57.5289	1.85465	0.734289	2.52577	0.0115444	0.131017	1.0365
ENSOARG00020024229	106.763	2.07995	0.82753	2.51344	0.011956	0.131017	1.07549
ENSOARG00020001998	37.8766	2.38807	0.946107	2.52411	0.0115993	0.131177	1.0365
ENSOARG00020014440	11.3851	3.73083	1.37127	2.72072	0.00651407	0.131177	0.582037
ENSOARG00020019892	3942.96	-1.20084	0.488978	-2.45582	0.0140565	0.131177	1.25874
ENSOARG00020022981	72998.8	-1.12916	0.475299	-2.37568	0.0175167	0.131177	1.56456
ENSOARG00020025179	8.48377	-4.12756	1.51506	-2.72435	0.0064428	0.131177	0.576109
ENSOARG00020022527	80.4586	1.86355	0.739851	2.51881	0.0117752	0.131208	1.05065
ENSOARG00020024488	700.328	-1.36616	0.556651	-2.45424	0.0141181	0.131262	1.25818
ENSOARG00020008594	95.4889	1.60224	0.636319	2.51798	0.0118029	0.131309	1.05065
ENSOARG00020011142	247.867	1.58434	0.650857	2.43424	0.0149232	0.13149	1.32479
ENSOARG00020019786	91.812	1.50319	0.630247	2.38507	0.0170757	0.13149	1.51551
ENSOARG00020004234	39.8179	1.82644	0.724463	2.52109	0.0116991	0.131618	1.0365
ENSOARG00020019732	1091.89	-1.34593	0.516656	-2.60507	0.00918555	0.131921	0.811298
ENSOARG00020018212	323.159	-1.21429	0.499544	-2.43079	0.0150659	0.132402	1.32479
ENSOARG00020004244	235.879	-1.39477	0.569761	-2.44799	0.0143655	0.132825	1.25818
ENSOARG00020000528	299.575	-1.24252	0.511697	-2.42824	0.0151723	0.133008	1.32479
ENSOARG00020013823	815.471	1.1118	0.459085	2.42177	0.0154453	0.133008	1.34778
ENSOARG00020023513	1365.13	-1.38611	0.572204	-2.4224	0.0154185	0.133008	1.34536
ENSOARG00020009703	684.533	1.48688	0.552575	2.69082	0.00712766	0.133132	0.620826
ENSOARG00020016497	74.8694	1.55933	0.62871	2.48021	0.0131306	0.133132	1.14286
ENSOARG00020012453	2391.42	1.8005	0.696298	2.58581	0.00971493	0.133449	0.841578
ENSOARG00020020749	1159.6	-1.18575	0.492258	-2.40879	0.0160055	0.133449	1.38744
ENSOARG00020024160	83.1308	1.92467	0.809885	2.37647	0.0174792	0.133449	1.51551
ENSOARG00020022817	230.103	1.65948	0.669913	2.47716	0.0132432	0.133853	1.14286
ENSOARG00020013167	405.261	-1.24345	0.478068	-2.601	0.00929526	0.134086	0.800144
ENSOARG00020007207	240.507	-1.23161	0.507545	-2.42659	0.0152413	0.134356	1.3073
ENSOARG00020014424	12.8363	3.13958	1.15972	2.70719	0.00678554	0.134356	0.582037
ENSOARG00020020186	21.0454	3.18847	1.17696	2.70907	0.00674714	0.134861	0.576109
ENSOARG00020010263	34593.9	-1.23793	0.479767	-2.58027	0.00987233	0.134977	0.841578
ENSOARG00020017211	1937.1	-1.13043	0.468953	-2.41054	0.0159287	0.135775	1.34778
ENSOARG00020020268	357.564	1.55736	0.644332	2.41702	0.0156483	0.135775	1.32479
ENSOARG00020025565	874.692	-1.08869	0.459424	-2.36969	0.0178032	0.13595	1.50327
ENSOARG00020022080	31.6062	2.62838	0.999794	2.62892	0.00856561	0.135955	0.722675
ENSOARG00020019275	623.991	1.38549	0.569308	2.43364	0.0149478	0.136168	1.25818
ENSOARG00020014307	4900.97	-1.18162	0.502211	-2.35284	0.0186308	0.136378	1.56456
ENSOARG00020019886	99.3867	1.82588	0.772269	2.3643	0.0180642	0.136405	1.51551
ENSOARG00020026192	211.91	1.42119	0.540119	2.63126	0.00850693	0.136822	0.710965
ENSOARG00020009945	340.057	1.43443	0.590274	2.43011	0.0150943	0.137077	1.25818
ENSOARG00020003237	24.8802	2.17613	0.857905	2.53657	0.0111946	0.137317	0.930765
ENSOARG00020025853	20.5137	2.86608	1.1309	2.53434	0.011266	0.138087	0.930765
ENSOARG00020003217	34244.7	1.50311	0.619846	2.42497	0.0153097	0.138542	1.25874
ENSOARG00020023134	2213.67	1.48657	0.612971	2.42519	0.0153002	0.138542	1.25874
ENSOARG00020014614	232.31	-1.30476	0.542595	-2.40466	0.0161876	0.139076	1.32479
ENSOARG00020018452	89.7473	1.45802	0.588026	2.47952	0.0131558	0.139121	1.07549
ENSOARG00020015993	412.92	1.23753	0.51131	2.42031	0.0155074	0.14007	1.25818
ENSOARG00020005791	42.9019	-1.98287	0.805218	-2.46253	0.013796	0.14017	1.11766
ENSOARG00020001184	517.037	-1.28595	0.482951	-2.6627	0.00775162	0.140275	0.620826
ENSOARG00020001189	852.444	1.1545	0.478099	2.41476	0.0157455	0.140275	1.25818
ENSOARG00020001194	797.875	1.22881	0.461425	2.66307	0.00774313	0.140275	0.620826
ENSOARG00020008821	4047.48	-1.31163	0.56174	-2.33494	0.0195465	0.140275	1.56456
ENSOARG00020011584	2639.22	1.15279	0.493844	2.33432	0.0195792	0.140275	1.56456
ENSOARG00020014955	309.403	1.30179	0.538743	2.41635	0.0156771	0.140275	1.25818
ENSOARG00020015560	250.637	-1.91597	0.798589	-2.3992	0.0164311	0.140275	1.32479
ENSOARG00020015600	6733.06	-1.03331	0.45127	-2.28978	0.0220343	0.140275	1.76929
ENSOARG00020016902	71.3405	2.12499	0.867172	2.45049	0.0142664	0.140275	1.14286
ENSOARG00020018035	307.285	1.63706	0.63529	2.57687	0.00996988	0.140275	0.800144
ENSOARG00020019427	129.841	2.07629	0.840106	2.47147	0.0134561	0.140275	1.07549
ENSOARG00020020912	196.337	1.34933	0.561912	2.40131	0.0163364	0.140275	1.3073
ENSOARG00020021398	365.744	-2.04768	0.794514	-2.57727	0.00995847	0.140275	0.800144
ENSOARG00020021818	210.831	1.61502	0.672257	2.40238	0.0162889	0.140275	1.3073
ENSOARG00020023856	163.061	1.80343	0.688831	2.61811	0.00884191	0.140275	0.710965
ENSOARG00020024288	507.992	1.27251	0.53167	2.39341	0.0166925	0.140275	1.34778
ENSOARG00020025589	58.5785	1.92132	0.781776	2.45763	0.0139856	0.140275	1.11766
ENSOARG00020015915	745.724	-1.21145	0.455537	-2.65939	0.00782832	0.141125	0.620826
ENSOARG00020018153	131.742	1.44061	0.590788	2.43845	0.0147504	0.141125	1.17044
ENSOARG00020013960	104.724	1.63648	0.660824	2.47643	0.0132704	0.141255	1.05065
ENSOARG00020017087	7406.43	1.16265	0.498342	2.33304	0.0196462	0.141732	1.54903
ENSOARG00020006330	324.144	1.48438	0.636468	2.33222	0.0196891	0.141992	1.54722
ENSOARG00020021012	105.453	1.60336	0.658482	2.43494	0.0148944	0.141992	1.17044
ENSOARG00020001829	3706.58	1.30648	0.572922	2.28037	0.0225856	0.14233	1.76929
ENSOARG00020013081	93.5583	1.9024	0.769788	2.47133	0.013461	0.142743	1.05065
ENSOARG00020019074	472.156	-1.28124	0.499144	-2.56688	0.0102617	0.142776	0.800144
ENSOARG00020010104	226.37	1.56687	0.65534	2.39093	0.0168056	0.142899	1.3073
ENSOARG00020010273	5594.23	-1.14996	0.49471	-2.32452	0.0200978	0.142899	1.56456
ENSOARG00020018117	229.54	2.08204	0.798811	2.60642	0.00914936	0.142944	0.710965
ENSOARG00020024043	72.0135	1.9053	0.774475	2.46012	0.013889	0.143339	1.07549
ENSOARG00020012008	2177	-1.43341	0.596711	-2.40218	0.0162975	0.143563	1.25874
ENSOARG00020022265	42649	-1.14341	0.449129	-2.54584	0.0109017	0.143563	0.841578
ENSOARG00020006596	405.677	1.85839	0.773967	2.40112	0.0163449	0.143758	1.25818
ENSOARG00020016471	27.7225	2.37646	0.856337	2.77514	0.00551779	0.143758	0.425055
ENSOARG00020003282	115.708	1.35995	0.558503	2.43499	0.0148921	0.144088	1.14286
ENSOARG00020017586	2721.55	1.12867	0.497216	2.26999	0.0232084	0.144842	1.76929
ENSOARG00020024148	651.168	-1.39018	0.586021	-2.37224	0.0176806	0.144842	1.34778
ENSOARG00020011586	129.68	1.61929	0.66814	2.42357	0.0153686	0.144869	1.17044
ENSOARG00020023438	21.8611	2.66192	0.978061	2.72163	0.0064961	0.145475	0.492299
ENSOARG00020024624	13710.6	-1.06627	0.460194	-2.31699	0.0205043	0.145823	1.54903
ENSOARG00020013226	10994.9	-1.24732	0.538465	-2.31643	0.0205349	0.145831	1.54903
ENSOARG00020018336	34390.4	-1.06224	0.443797	-2.39352	0.0166876	0.145831	1.25874
ENSOARG00020009881	619.214	1.35961	0.584307	2.32688	0.0199719	0.145858	1.50327
ENSOARG00020019515	236.069	1.42478	0.548964	2.59539	0.00944833	0.145858	0.710965
ENSOARG00020022898	10.6996	4.76578	1.78926	2.66355	0.00773214	0.145858	0.582037
ENSOARG00020025233	442.907	1.36505	0.534479	2.55398	0.01065	0.145976	0.800144
ENSOARG00020000694	192.915	-1.33584	0.558489	-2.39187	0.0167626	0.145984	1.25818
ENSOARG00020020018	80.3324	1.80454	0.776963	2.32256	0.0202028	0.145984	1.51551
ENSOARG00020000103	47.5858	2.34354	0.905571	2.58791	0.00965595	0.146166	0.722675
ENSOARG00020020882	3590.16	-1.11835	0.467834	-2.39049	0.0168257	0.146166	1.25874
ENSOARG00020024329	23.7704	-2.66433	0.980654	-2.71689	0.00658977	0.146261	0.492299
ENSOARG00020004853	139.195	1.48142	0.611138	2.42403	0.0153494	0.146498	1.14286
ENSOARG00020024683	240.161	-1.93921	0.811812	-2.38874	0.0169064	0.146498	1.25818
ENSOARG00020025752	296.125	1.32711	0.541937	2.44884	0.0143318	0.146498	1.06694
ENSOARG00020000463	14.136	3.14503	1.18421	2.6558	0.007912	0.147994	0.582037
ENSOARG00020016858	42.3589	2.38752	1.0118	2.35966	0.0182916	0.147994	1.34552
ENSOARG00020016749	179.194	-1.34824	0.569266	-2.36838	0.017866	0.148667	1.3073
ENSOARG00020006926	550.109	-1.14458	0.494344	-2.31536	0.0205933	0.148912	1.50327
ENSOARG00020011077	274.25	-1.22712	0.502674	-2.44119	0.0146391	0.149037	1.06694
ENSOARG00020010617	2696.44	-1.22745	0.515624	-2.38051	0.0172887	0.149083	1.25874
ENSOARG00020006637	19.7851	3.25688	1.22897	2.65008	0.00804723	0.149773	0.582037
ENSOARG00020007626	381.095	1.52845	0.66431	2.3008	0.0214029	0.149773	1.54722
ENSOARG00020008095	11.1778	3.13425	1.26018	2.48715	0.0128771	0.149773	0.930765
ENSOARG00020008829	82.8526	1.65876	0.679101	2.44258	0.0145827	0.149773	1.05065
ENSOARG00020009112	1274.78	-1.22431	0.523085	-2.34055	0.0192551	0.149773	1.38744
ENSOARG00020009128	106.434	1.66348	0.689443	2.41279	0.0158311	0.149773	1.14286
ENSOARG00020010090	818.651	1.25487	0.543048	2.31079	0.0208446	0.149773	1.50327
ENSOARG00020016255	538.695	-1.38847	0.590112	-2.3529	0.0186278	0.149773	1.34536
ENSOARG00020001148	18210.4	1.04978	0.441761	2.37636	0.0174845	0.149779	1.25874
ENSOARG00020004038	790.477	-1.67046	0.710636	-2.35066	0.0187401	0.149821	1.34778
ENSOARG00020000062	56.4746	2.18479	0.906787	2.40938	0.0159798	0.150111	1.14286
ENSOARG00020000866	199.953	-1.32627	0.561979	-2.36	0.0182749	0.150111	1.3073
ENSOARG00020010000	150.838	1.65306	0.700324	2.36042	0.0182541	0.150111	1.3073
ENSOARG00020018570	33.5554	-2.38255	0.988516	-2.41023	0.0159426	0.150111	1.14286
ENSOARG00020021437	48.6584	2.45343	1.01469	2.41792	0.0156094	0.150111	1.11766
ENSOARG00020004101	897.586	1.55529	0.592967	2.62289	0.00871877	0.150662	0.620826
ENSOARG00020005865	222.675	-1.66313	0.645778	-2.57539	0.0100127	0.150918	0.710965
ENSOARG00020011830	438.365	-1.1367	0.479358	-2.3713	0.0177254	0.150918	1.25818
ENSOARG00020000596	140.949	2.1109	0.877772	2.40484	0.0161797	0.151418	1.14286
ENSOARG00020003461	536.911	-1.20704	0.524083	-2.30315	0.0212705	0.151418	1.50327
ENSOARG00020015605	821.708	1.21244	0.526528	2.30272	0.0212948	0.151418	1.50327
ENSOARG00020008299	802.771	-1.35917	0.519022	-2.61872	0.00882604	0.151853	0.620826
ENSOARG00020003257	482.021	-1.24237	0.539925	-2.301	0.0213914	0.151885	1.50327
ENSOARG00020024602	231.629	1.58865	0.661439	2.40181	0.0163141	0.152235	1.14286
ENSOARG00020025959	2016.11	1.27456	0.520799	2.44732	0.0143925	0.152235	1.00764
ENSOARG00020007838	668.757	-1.34966	0.515882	-2.61621	0.00889112	0.152455	0.620826
ENSOARG00020011494	37.3587	2.64569	1.13055	2.34019	0.019274	0.152455	1.34552
ENSOARG00020010235	23.9482	2.38546	0.903288	2.64086	0.00826963	0.152592	0.576109
ENSOARG00020019253	112.142	1.44977	0.604154	2.39968	0.0164095	0.152592	1.14286
ENSOARG00020002805	2381.72	-1.62604	0.648058	-2.5091	0.0121039	0.152739	0.841578
ENSOARG00020017467	149.527	1.59755	0.676229	2.36244	0.0181552	0.153111	1.25818
ENSOARG00020021699	7185.2	-1.12842	0.505327	-2.23306	0.0255452	0.153111	1.76929
ENSOARG00020000668	82.9111	-1.43811	0.594455	-2.41921	0.0155544	0.153151	1.07549
ENSOARG00020019160	33.8561	2.51642	1.07684	2.33685	0.019447	0.153151	1.34552
ENSOARG00020012987	1410.56	-1.17401	0.50512	-2.32422	0.0201139	0.153295	1.38744
ENSOARG00020013477	560.649	2.09409	0.801697	2.61208	0.0089994	0.153295	0.620826
ENSOARG00020016190	746.84	1.17738	0.498817	2.36035	0.0182577	0.153334	1.25818
ENSOARG00020003803	90.2601	1.77989	0.74307	2.39532	0.0166057	0.153422	1.14286
ENSOARG00020018459	716.785	-1.2273	0.525845	-2.33396	0.0195978	0.153428	1.34778
ENSOARG00020013214	3011.9	-1.59981	0.678161	-2.35904	0.0183222	0.153477	1.25874
ENSOARG00020014006	431.816	1.43064	0.591421	2.41898	0.0155641	0.153701	1.06694
ENSOARG00020013345	443.452	1.52944	0.67092	2.27962	0.0226301	0.153817	1.54722
ENSOARG00020014070	61.0275	-1.59197	0.665174	-2.39331	0.0166973	0.153817	1.14286
ENSOARG00020014863	106.076	1.53512	0.643913	2.38405	0.0171234	0.153817	1.17044
ENSOARG00020005520	683.451	-1.10349	0.482022	-2.2893	0.0220622	0.154193	1.50327
ENSOARG00020005374	8425.66	1.01661	0.447256	2.27299	0.023027	0.154522	1.56456
ENSOARG00020019578	516.401	-1.3177	0.566059	-2.32785	0.0199198	0.155061	1.34778
ENSOARG00020009593	155.264	-1.49169	0.633949	-2.35302	0.0186217	0.155169	1.25818
ENSOARG00020007998	35.7767	2.46371	0.965534	2.55166	0.0107212	0.155424	0.722675
ENSOARG00020003026	216.794	-1.99588	0.855729	-2.33237	0.0196812	0.155465	1.32479
ENSOARG00020003728	18919.4	-1.05979	0.467235	-2.26822	0.023316	0.155465	1.56456
ENSOARG00020003931	719.334	1.29134	0.555314	2.32543	0.0200491	0.155465	1.34536
ENSOARG00020008698	2242.15	1.05589	0.475299	2.22154	0.0263147	0.155465	1.76929
ENSOARG00020012857	3679.73	-1.3646	0.580454	-2.35092	0.0187272	0.155465	1.25874
ENSOARG00020013936	151.762	1.37321	0.584139	2.35083	0.0187316	0.155465	1.25818
ENSOARG00020012402	1077.29	-1.14731	0.472053	-2.43047	0.0150793	0.156006	1.00764
ENSOARG00020020510	581.992	1.8827	0.724106	2.60003	0.00932147	0.156303	0.620826
ENSOARG00020023265	2021.11	-1.1826	0.509123	-2.32282	0.0201887	0.156303	1.34536
ENSOARG00020004509	75.1802	2.05835	0.867252	2.37341	0.0176245	0.156584	1.17044
ENSOARG00020019461	138.11	-1.52184	0.63887	-2.38209	0.0172148	0.156584	1.14286
ENSOARG00020022143	2294.96	-1.10178	0.486165	-2.26626	0.0234355	0.157162	1.54903
ENSOARG00020020019	76.2576	-1.54452	0.649165	-2.37925	0.017348	0.157573	1.14286
ENSOARG00020012571	95.0712	1.75791	0.730055	2.40791	0.0160441	0.158409	1.05065
ENSOARG00020012622	2898.82	-1.38881	0.614053	-2.26171	0.0237156	0.158705	1.54903
ENSOARG00020010020	2899.26	2.10895	0.848101	2.48668	0.0128942	0.158713	0.841578
ENSOARG00020003478	489.164	-1.15139	0.497569	-2.31403	0.0206663	0.158727	1.34778
ENSOARG00020021776	36.2093	2.3141	0.959938	2.41067	0.0159232	0.158824	1.0365
ENSOARG00020023387	1931.55	1.48411	0.61304	2.4209	0.015482	0.158824	1.00764
ENSOARG00020008688	292.954	1.36345	0.568179	2.39968	0.0164096	0.158873	1.06694
ENSOARG00020016403	547.183	1.10994	0.488797	2.27077	0.0231612	0.158931	1.50327
ENSOARG00020023116	3137.68	1.04162	0.461797	2.25558	0.0240968	0.158931	1.56456
ENSOARG00020015317	1383.74	-1.61735	0.702973	-2.30073	0.0214066	0.159043	1.38744
ENSOARG00020003305	66.6507	-2.18811	0.862472	-2.53703	0.0111799	0.159357	0.722675
ENSOARG00020003403	105.687	1.6671	0.702944	2.3716	0.0177111	0.159441	1.14286
ENSOARG00020004733	17.7737	2.76011	1.0556	2.61474	0.0089296	0.159441	0.576109
ENSOARG00020010196	1280.73	-1.14776	0.460093	-2.49463	0.0126088	0.159646	0.811298
ENSOARG00020015473	167.387	-1.4621	0.626189	-2.33492	0.0195474	0.159646	1.25818
ENSOARG00020010236	248.858	1.81956	0.716297	2.54024	0.0110777	0.159842	0.710965
ENSOARG00020011418	1047.39	-1.06669	0.46218	-2.30796	0.0210013	0.159842	1.34778
ENSOARG00020000285	67.2136	-1.96447	0.829424	-2.36847	0.0178618	0.160014	1.14286
ENSOARG00020014754	158.032	-1.32543	0.559542	-2.36878	0.0178471	0.160014	1.14286
ENSOARG00020025841	50.3602	2.16068	0.93641	2.3074	0.0210324	0.160014	1.34552
ENSOARG00020015345	56.9516	-2.14349	0.929322	-2.30651	0.0210823	0.160171	1.34552
ENSOARG00020026315	2058.41	-1.70425	0.706009	-2.41392	0.0157817	0.160171	1.00764
ENSOARG00020001045	218.581	1.62579	0.640858	2.53689	0.0111841	0.160194	0.710965
ENSOARG00020005456	806.238	1.37157	0.588614	2.33017	0.0197973	0.160194	1.25818
ENSOARG00020005746	344.988	1.28683	0.552088	2.33085	0.0197613	0.160194	1.25818
ENSOARG00020023765	29.4447	2.63012	1.09452	2.40298	0.0162619	0.160194	1.0365
ENSOARG00020024956	36949.7	-1.09414	0.486809	-2.24758	0.0246031	0.160194	1.56456
ENSOARG00020025915	563.564	-1.08958	0.481542	-2.26268	0.0236555	0.160194	1.50327
ENSOARG00020017573	315	-1.25926	0.540586	-2.32943	0.0198363	0.160328	1.25818
ENSOARG00020022220	89.0056	1.39285	0.616653	2.25872	0.0239009	0.160328	1.51551
ENSOARG00020017382	430.854	-1.28592	0.556811	-2.30943	0.0209197	0.160422	1.32479
ENSOARG00020018837	529.543	1.15966	0.503686	2.30234	0.0213158	0.160561	1.34778
ENSOARG00020004833	218.855	-1.20709	0.518537	-2.32787	0.0199191	0.160614	1.25818
ENSOARG00020023246	1818.72	-1.29397	0.564988	-2.29026	0.0220065	0.160803	1.38744
ENSOARG00020005954	14.7655	3.19066	1.30908	2.43732	0.0147964	0.161056	0.930765
ENSOARG00020018165	6390.39	-1.84286	0.792485	-2.32542	0.0200497	0.161263	1.25874
ENSOARG00020002051	264.672	-1.39481	0.599858	-2.32524	0.0200591	0.1613	1.25818
ENSOARG00020017637	2093.27	-1.03029	0.469627	-2.19386	0.0282455	0.16133	1.76929
ENSOARG00020017762	401.492	1.24228	0.520728	2.38566	0.0170484	0.16133	1.06694
ENSOARG00020020116	37.8022	-1.6834	0.732187	-2.29914	0.0214972	0.16133	1.34552
ENSOARG00020009078	1427.42	-1.08755	0.47316	-2.29848	0.0215343	0.161498	1.34536
ENSOARG00020014549	604.833	-1.33882	0.519444	-2.5774	0.00995457	0.16167	0.620826
ENSOARG00020010025	228.571	-1.19032	0.504699	-2.35847	0.0183504	0.161782	1.14286
ENSOARG00020003400	2611.88	-1.32319	0.603846	-2.19127	0.0284324	0.161807	1.76929
ENSOARG00020006877	371.667	1.38803	0.603006	2.30185	0.0213439	0.162022	1.32479
ENSOARG00020021910	118.697	1.93089	0.808498	2.38824	0.0169293	0.162022	1.05065
ENSOARG00020013078	1081.7	-1.28105	0.516253	-2.48144	0.0130854	0.16207	0.811298
ENSOARG00020008374	19.6734	2.96326	1.14178	2.59529	0.00945104	0.162628	0.582037
ENSOARG00020015827	10867.7	-1.15491	0.498204	-2.31814	0.0204415	0.162628	1.25874
ENSOARG00020022978	408.501	1.36057	0.586769	2.31875	0.0204086	0.162628	1.25818
ENSOARG00020023218	57.3971	1.77302	0.750442	2.36264	0.0181452	0.162628	1.11766
ENSOARG00020023962	393.743	-1.62174	0.699439	-2.31863	0.0204153	0.162628	1.25818
ENSOARG00020019410	1288.55	1.46343	0.590706	2.47743	0.0132332	0.163233	0.811298
ENSOARG00020000823	45.0579	1.87512	0.744672	2.51804	0.0118009	0.163306	0.722675
ENSOARG00020000855	10082.8	-1.65596	0.741802	-2.23235	0.0255919	0.163473	1.56456
ENSOARG00020004519	29.2875	-2.5956	1.10046	-2.35864	0.0183419	0.163781	1.11766
ENSOARG00020006197	176.117	-1.20528	0.520751	-2.31451	0.0206399	0.163781	1.25818
ENSOARG00020011241	95.5725	1.38788	0.618716	2.24316	0.0248868	0.163781	1.51551
ENSOARG00020014091	888.001	1.38184	0.603887	2.28825	0.022123	0.163895	1.34536
ENSOARG00020003487	35.7361	2.5795	1.02566	2.51498	0.011904	0.164065	0.722675
ENSOARG00020005117	337.726	1.24517	0.524691	2.37316	0.0176368	0.164341	1.06694
ENSOARG00020006742	453.368	1.28513	0.555956	2.31156	0.0208019	0.164341	1.25818
ENSOARG00020013488	794.07	-1.13163	0.489452	-2.31204	0.0207754	0.164341	1.25818
ENSOARG00020006027	341.641	-1.635	0.660047	-2.4771	0.0132454	0.164434	0.800144
ENSOARG00020011876	415.237	1.03201	0.462512	2.23133	0.0256595	0.164626	1.54722
ENSOARG00020011009	1298.06	1.35492	0.593087	2.28453	0.0223406	0.164728	1.34536
ENSOARG00020007502	79.1109	1.5428	0.651555	2.36788	0.0178903	0.164904	1.07549
ENSOARG00020021249	29459.1	-1.24197	0.570412	-2.17732	0.0294564	0.164933	1.76929
ENSOARG00020006510	330.08	1.17874	0.51083	2.3075	0.0210268	0.16545	1.25818
ENSOARG00020005625	190.044	1.64338	0.702003	2.34099	0.0192326	0.16573	1.14286
ENSOARG00020011715	97.1013	1.71752	0.733223	2.34242	0.0191591	0.16573	1.14286
ENSOARG00020013990	112.079	1.52166	0.681227	2.2337	0.0255028	0.16573	1.51551
ENSOARG00020016453	483.195	1.21752	0.475377	2.56116	0.0104322	0.16573	0.620826
ENSOARG00020020197	3356.25	-1.07991	0.486073	-2.22169	0.0263041	0.16573	1.56456
ENSOARG00020021626	1113.96	-1.19768	0.485391	-2.46745	0.013608	0.16573	0.811298
ENSOARG00020022603	28.6654	-3.03634	1.15004	-2.64021	0.00828554	0.16573	0.492299
ENSOARG00020024830	1387.88	2.10447	0.881274	2.38799	0.016941	0.16573	1.00764
ENSOARG00020002120	100.61	1.525	0.645302	2.36324	0.018116	0.165759	1.07549
ENSOARG00020005455	3085.13	-1.21809	0.56072	-2.17237	0.029828	0.165789	1.76929
ENSOARG00020007900	347.466	-1.37449	0.581192	-2.36494	0.018033	0.166099	1.06694
ENSOARG00020019822	350.871	-1.49319	0.671589	-2.22337	0.0261911	0.166136	1.54722
ENSOARG00020021175	607.991	-1.28384	0.557511	-2.30281	0.0212897	0.166136	1.25818
ENSOARG00020013210	367.836	-1.35152	0.592168	-2.28233	0.0224699	0.166352	1.32479
ENSOARG00020014242	275.035	1.22913	0.553362	2.22121	0.0263367	0.166791	1.54722
ENSOARG00020026407	63.6798	2.12985	0.908288	2.3449	0.0190321	0.166791	1.11766
ENSOARG00020009838	2774.71	-1.25149	0.564929	-2.21531	0.0267387	0.167063	1.56456
ENSOARG00020012241	171.079	1.43257	0.571216	2.50794	0.0121439	0.167063	0.710965
ENSOARG00020021482	428.788	1.60648	0.680384	2.36114	0.018219	0.167063	1.06694
ENSOARG00020008671	98.0903	1.51327	0.650592	2.32599	0.0200189	0.167068	1.17044
ENSOARG00020009392	30.445	-1.91794	0.818569	-2.34305	0.0191271	0.167068	1.11766
ENSOARG00020002568	132.995	1.49656	0.672049	2.22686	0.0259568	0.167095	1.51551
ENSOARG00020026321	6771.36	-1.1179	0.504923	-2.214	0.0268285	0.167181	1.56456
ENSOARG00020009561	5974.5	1.71063	0.772297	2.21499	0.0267606	0.168319	1.54903
ENSOARG00020016362	241.189	1.60435	0.688294	2.33091	0.0197581	0.16833	1.14286
ENSOARG00020002724	282.853	1.80584	0.78716	2.29412	0.0217836	0.168465	1.25818
ENSOARG00020006104	3276.59	-1.21164	0.528361	-2.29321	0.0218357	0.168552	1.25874
ENSOARG00020012054	11.8527	3.12408	1.2127	2.57615	0.00999083	0.168552	0.576109
ENSOARG00020014341	1157.96	-1.91487	0.848857	-2.25583	0.0240816	0.168552	1.38744
ENSOARG00020006773	806.923	-1.11862	0.48792	-2.29262	0.0218699	0.168687	1.25818
ENSOARG00020000554	42.68	2.69359	1.15688	2.32833	0.0198944	0.168749	1.14286
ENSOARG00020005389	261861	-1.58894	0.650981	-2.44084	0.0146531	0.168749	0.841578
ENSOARG00020010154	123.994	1.42776	0.615822	2.31847	0.0204238	0.169009	1.17044
ENSOARG00020021942	2776.36	-1.2652	0.518656	-2.43938	0.0147126	0.169212	0.841578
ENSOARG00020010209	5983.72	-1.40456	0.613649	-2.28886	0.0220875	0.169558	1.25874
ENSOARG00020011519	19.6462	3.38415	1.31795	2.56775	0.0102362	0.169558	0.582037
ENSOARG00020011596	1105.96	-1.1111	0.493631	-2.25087	0.0243935	0.169558	1.38744
ENSOARG00020012730	864.72	1.68914	0.746409	2.26302	0.0236343	0.169558	1.34536
ENSOARG00020016098	842.99	1.0782	0.476509	2.26271	0.0236535	0.169558	1.34536
ENSOARG00020025667	1902.4	-1.22851	0.542863	-2.26302	0.0236345	0.169558	1.34536
ENSOARG00020012304	60.3542	1.81733	0.729398	2.49155	0.0127188	0.16957	0.722675
ENSOARG00020017071	36.002	-1.68444	0.744703	-2.26189	0.0237042	0.169629	1.34552
ENSOARG00020013126	129.905	1.65561	0.705756	2.34586	0.018983	0.16984	1.07549
ENSOARG00020005534	66.0026	2.14201	0.922423	2.32216	0.0202244	0.170168	1.14286
ENSOARG00020004389	1431.65	1.23489	0.547001	2.25756	0.0239733	0.170356	1.34778
ENSOARG00020006563	112.513	1.98739	0.856531	2.32027	0.0203261	0.170356	1.14286
ENSOARG00020009310	11946.2	1.2998	0.534222	2.43306	0.0149718	0.170356	0.841578
ENSOARG00020011301	213.794	1.47242	0.634558	2.32038	0.0203203	0.170356	1.14286
ENSOARG00020013424	381.657	-1.10301	0.500496	-2.20384	0.0275353	0.170356	1.54722
ENSOARG00020014446	95.074	1.47482	0.638156	2.31106	0.0208296	0.170356	1.17044
ENSOARG00020022605	3824.54	-1.00789	0.457969	-2.20078	0.0277514	0.170356	1.56456
ENSOARG00020012374	237.829	1.45462	0.583511	2.49288	0.0126713	0.170494	0.710965
ENSOARG00020019993	1191.51	-1.20422	0.508926	-2.3662	0.0179718	0.170506	1.00764
ENSOARG00020014160	114.181	-1.38017	0.589526	-2.34116	0.0192241	0.170771	1.07549
ENSOARG00020010968	62.8565	1.65629	0.703411	2.35466	0.0185396	0.170775	1.0365
ENSOARG00020017397	994.238	1.36149	0.557103	2.44388	0.0145301	0.170808	0.811298
ENSOARG00020023331	7325.04	-1.39422	0.611232	-2.281	0.0225482	0.170808	1.25874
ENSOARG00020004060	12.0312	3.01714	1.26108	2.3925	0.0167342	0.170995	0.930765
ENSOARG00020004328	214.802	1.64578	0.728203	2.26005	0.0238181	0.170995	1.32479
ENSOARG00020014408	555.822	1.14372	0.501648	2.27992	0.0226124	0.170995	1.25818
ENSOARG00020025061	1257.84	-1.07249	0.475935	-2.25343	0.0242322	0.170995	1.34778
ENSOARG00020019354	63.738	1.87179	0.809223	2.31307	0.020719	0.172197	1.14286
ENSOARG00020019632	118.971	1.40702	0.638161	2.20481	0.0274676	0.172197	1.51551
ENSOARG00020021827	768.672	1.29736	0.570279	2.27495	0.0229089	0.172835	1.25818
ENSOARG00020020417	919.805	-1.69597	0.696391	-2.43536	0.0148768	0.173948	0.811298
ENSOARG00020001547	956.755	-1.09396	0.48965	-2.23417	0.0254722	0.174027	1.38744
ENSOARG00020016109	105.585	-1.63391	0.701106	-2.33048	0.0197809	0.174027	1.07549
ENSOARG00020019056	64.7051	1.95737	0.845085	2.31618	0.0205487	0.174027	1.11766
ENSOARG00020024778	547.916	-1.16739	0.530092	-2.20225	0.0276479	0.174027	1.50327
ENSOARG00020010301	383.734	-1.12002	0.493285	-2.27054	0.0231749	0.174169	1.25818
ENSOARG00020004330	1467.29	-1.13377	0.46602	-2.43288	0.0149794	0.174474	0.811298
ENSOARG00020003513	202.705	1.46885	0.652975	2.24947	0.0244825	0.174522	1.32479
ENSOARG00020004385	39.8304	2.28823	0.977239	2.34152	0.0192053	0.17487	1.0365
ENSOARG00020014491	402.497	1.78039	0.730954	2.43571	0.0148625	0.175078	0.800144
ENSOARG00020024188	540.393	-1.36043	0.60686	-2.24176	0.0249769	0.175078	1.34536
ENSOARG00020025689	801748	1.95891	0.810769	2.41611	0.0156874	0.175584	0.841578
ENSOARG00020004775	457.161	1.06627	0.474812	2.24568	0.0247247	0.175686	1.32479
ENSOARG00020020563	3178	-1.27092	0.561501	-2.26343	0.0236095	0.176451	1.25874
ENSOARG00020012121	1394.74	-1.54091	0.656755	-2.34624	0.0189638	0.176842	1.00764
ENSOARG00020020170	420.841	-1.23475	0.531119	-2.32481	0.020082	0.176842	1.06694
ENSOARG00020015255	51.8266	2.05415	0.918732	2.23585	0.0253617	0.176984	1.34552
ENSOARG00020000934	443.673	-1.24477	0.55069	-2.26038	0.0237979	0.177083	1.25818
ENSOARG00020014769	2313.73	-1.22595	0.56345	-2.17579	0.0295712	0.177083	1.56456
ENSOARG00020015501	44.5259	2.05816	0.881662	2.33441	0.0195744	0.177083	1.0365
ENSOARG00020017786	35923.3	1.38901	0.653337	2.12603	0.0335008	0.177083	1.76929
ENSOARG00020021436	14646.2	-1.00037	0.459691	-2.17617	0.0295422	0.177083	1.56456
ENSOARG00020023068	259.594	1.43312	0.579893	2.47135	0.0134603	0.177083	0.710965
ENSOARG00020023834	1463.86	-1.24571	0.531493	-2.3438	0.0190884	0.177083	1.00764
ENSOARG00020017122	9435.79	1.98282	0.912048	2.17402	0.0297033	0.177246	1.56456
ENSOARG00020021619	393.995	1.70491	0.754674	2.25913	0.0238755	0.177246	1.25818
ENSOARG00020010928	4561.15	-1.10741	0.459693	-2.40901	0.0159958	0.177337	0.841578
ENSOARG00020013597	146.013	1.71476	0.759548	2.2576	0.0239704	0.177643	1.25818
ENSOARG00020001190	451.253	1.17301	0.538883	2.17674	0.0294999	0.177668	1.54722
ENSOARG00020007482	95.2092	-1.35019	0.618091	-2.18446	0.0289288	0.177762	1.51551
ENSOARG00020010720	22.942	2.28185	0.897981	2.54109	0.0110509	0.178519	0.576109
ENSOARG00020000120	177.824	-1.28665	0.561554	-2.29122	0.0219506	0.178636	1.14286
ENSOARG00020001692	8.98285	-3.53674	1.49385	-2.36752	0.0179075	0.17883	0.930765
ENSOARG00020002291	39.4837	2.56829	1.15386	2.22583	0.0260254	0.179324	1.34552
ENSOARG00020002301	8127.03	-1.21466	0.560672	-2.16644	0.0302776	0.179324	1.56456
ENSOARG00020003837	397.381	1.39094	0.640684	2.17103	0.0299291	0.179324	1.54722
ENSOARG00020004337	5662.37	-1.16962	0.538893	-2.17041	0.029976	0.179324	1.54903
ENSOARG00020019523	94.0189	1.35545	0.584227	2.32007	0.0203373	0.179324	1.05065
ENSOARG00020024994	82.6772	1.46428	0.672067	2.17877	0.0293489	0.179324	1.51551
ENSOARG00020026132	937.985	1.36881	0.618489	2.21315	0.0268871	0.179334	1.38744
ENSOARG00020006954	281.726	-1.43227	0.59202	-2.4193	0.0155505	0.179639	0.800144
ENSOARG00020025302	323.128	1.2724	0.565535	2.24992	0.0244543	0.179639	1.25818
ENSOARG00020015598	511.728	1.15191	0.518256	2.22266	0.0262385	0.17982	1.34778
ENSOARG00020002869	106.647	1.70311	0.745648	2.28407	0.0223673	0.180435	1.14286
ENSOARG00020003934	8094.85	1.0627	0.472861	2.24738	0.0246155	0.180435	1.25874
ENSOARG00020021046	92.754	-1.44063	0.622046	-2.31595	0.0205611	0.180435	1.05065
ENSOARG00020023782	130.237	1.42708	0.618706	2.30656	0.0210796	0.180587	1.07549
ENSOARG00020025367	644.476	-1.36991	0.609831	-2.24637	0.0246804	0.180621	1.25818
ENSOARG00020008664	604.349	-1.10004	0.495616	-2.21955	0.0264494	0.180775	1.34536
ENSOARG00020016911	120.099	1.58712	0.685754	2.31441	0.0206451	0.180775	1.05065
ENSOARG00020018187	9.00211	2.95909	1.2542	2.35934	0.0183076	0.180775	0.930765
ENSOARG00020001772	113.551	1.90005	0.82139	2.31322	0.0207107	0.180831	1.05065
ENSOARG00020007634	24.668	-2.5723	0.975659	-2.63647	0.00837733	0.180831	0.425055
ENSOARG00020019622	3754.42	-1.24275	0.574497	-2.16319	0.0305266	0.180831	1.54903
ENSOARG00020018318	907.177	1.25291	0.538035	2.32868	0.0198761	0.180838	1.00764
ENSOARG00020002936	376.425	-1.38197	0.616148	-2.24293	0.0249015	0.181221	1.25818
ENSOARG00020016072	42.7862	2.0921	0.917661	2.27982	0.0226186	0.181221	1.14286
ENSOARG00020022153	1692.73	-1.39734	0.63383	-2.2046	0.0274824	0.181257	1.38744
ENSOARG00020018255	2158.3	-1.14416	0.542942	-2.10733	0.0350892	0.181369	1.76929
ENSOARG00020012384	40856.4	-1.11407	0.465602	-2.39276	0.0167223	0.181553	0.841578
ENSOARG00020021286	37.7007	1.88754	0.852078	2.21522	0.026745	0.181553	1.34552
ENSOARG00020000415	996.27	-1.21023	0.520665	-2.3244	0.0201042	0.182121	1.00764
ENSOARG00020021679	4131.04	-0.988666	0.458362	-2.15695	0.0310093	0.182618	1.54903
ENSOARG00020003729	8.01342	-4.05191	1.60447	-2.52538	0.0115572	0.182778	0.576109
ENSOARG00020023722	8.37767	3.48865	1.48326	2.35202	0.018672	0.182778	0.930765
ENSOARG00020004537	40.8294	1.63862	0.72087	2.27311	0.0230195	0.183404	1.14286
ENSOARG00020012862	77.4656	1.61864	0.748348	2.16295	0.0305452	0.18341	1.51551
ENSOARG00020024132	246.169	1.17667	0.52993	2.22043	0.0263898	0.183582	1.3073
ENSOARG00020007516	1089.77	-1.06343	0.481568	-2.20826	0.0272262	0.1836	1.34778
ENSOARG00020026025	289.682	1.33195	0.579964	2.29662	0.0216407	0.184232	1.06694
ENSOARG00020001322	1417.48	-1.04369	0.450494	-2.31677	0.0205161	0.184709	1.00764
ENSOARG00020002186	80.6744	-1.37741	0.609461	-2.26005	0.0238182	0.184709	1.17044
ENSOARG00020018235	1803.42	1.65441	0.714512	2.31544	0.0205886	0.185134	1.00764
ENSOARG00020022953	277.191	1.19143	0.53409	2.23077	0.0256962	0.185134	1.25818
ENSOARG00020004095	75.9868	-1.40842	0.612687	-2.29876	0.0215186	0.185214	1.05065
ENSOARG00020009370	124.881	1.44338	0.636799	2.26662	0.0234135	0.185214	1.14286
ENSOARG00020012709	355.089	-1.23284	0.513688	-2.39998	0.0163961	0.185214	0.800144
ENSOARG00020012963	173.142	-1.40618	0.575498	-2.44341	0.0145491	0.185214	0.710965
ENSOARG00020005311	25445.7	-1.22676	0.515418	-2.38013	0.0173064	0.185257	0.841578
ENSOARG00020008180	898.472	-1.28303	0.582712	-2.20182	0.0276778	0.185257	1.34778
ENSOARG00020013227	315.512	1.50435	0.700441	2.14771	0.0317365	0.185257	1.54722
ENSOARG00020015555	24.2292	2.03475	0.868651	2.34242	0.019159	0.185257	0.930765
ENSOARG00020015812	258.316	-1.21799	0.551669	-2.20782	0.0272566	0.185257	1.32479
ENSOARG00020016377	59.0838	1.83521	0.796952	2.30279	0.0212907	0.185257	1.0365
ENSOARG00020021690	200.394	-1.23599	0.554695	-2.22823	0.0258649	0.185257	1.25818
ENSOARG00020009801	744.961	-1.28553	0.584059	-2.20102	0.0277343	0.185307	1.34536
ENSOARG00020017517	622.396	1.25633	0.570974	2.20032	0.0277839	0.185307	1.34778
ENSOARG00020018419	533.757	1.34481	0.623791	2.15587	0.0310938	0.185817	1.50327
ENSOARG00020013933	148.845	1.44603	0.654299	2.21005	0.0271016	0.186096	1.3073
ENSOARG00020021308	440.246	1.36003	0.634553	2.14329	0.03209	0.186096	1.54722
ENSOARG00020026120	2471.64	-1.07757	0.503033	-2.14214	0.0321819	0.186298	1.54903
ENSOARG00020000574	48289.1	1.39602	0.651838	2.14167	0.0322203	0.186407	1.54903
ENSOARG00020006288	16.5279	2.98007	1.16074	2.56739	0.0102468	0.186418	0.492299
ENSOARG00020004620	94.1154	1.579	0.701473	2.25097	0.0243874	0.186501	1.17044
ENSOARG00020001198	191.112	-1.85776	0.822289	-2.25925	0.0238676	0.186703	1.14286
ENSOARG00020017738	97.5707	1.43392	0.667312	2.14881	0.0316497	0.186703	1.51551
ENSOARG00020015955	142.64	-1.4068	0.637492	-2.20677	0.0273301	0.186784	1.3073
ENSOARG00020019793	30798.7	-1.01064	0.47337	-2.135	0.0327613	0.186973	1.56456
ENSOARG00020009608	200.298	2.26284	0.929527	2.4344	0.0149166	0.187227	0.710965
ENSOARG00020008041	360.859	-1.36005	0.636317	-2.13738	0.0325673	0.187722	1.54722
ENSOARG00020017119	1356.76	-1.08346	0.49694	-2.18026	0.0292379	0.187825	1.38744
ENSOARG00020009039	120.699	-1.35686	0.59561	-2.2781	0.0227209	0.188081	1.07549
ENSOARG00020021740	71.8358	1.51791	0.66372	2.28697	0.0221974	0.188081	1.05065
ENSOARG00020009123	33.8341	-1.87394	0.855591	-2.19023	0.0285073	0.188497	1.34552
ENSOARG00020008466	293.245	-1.88047	0.788081	-2.38613	0.0170266	0.189207	0.800144
ENSOARG00020002018	862.603	-1.09294	0.495078	-2.20762	0.0272711	0.190863	1.25818
ENSOARG00020003155	36.3373	1.94725	0.863281	2.25564	0.0240929	0.190863	1.11766
ENSOARG00020003631	50.9956	-1.6471	0.733727	-2.24484	0.0247786	0.190863	1.14286
ENSOARG00020005559	134.201	1.28618	0.601917	2.1368	0.0326142	0.190863	1.51551
ENSOARG00020005659	1351.48	-1.24116	0.568294	-2.18401	0.0289614	0.190863	1.34536
ENSOARG00020009405	3668.04	-1.25534	0.568906	-2.20659	0.0273424	0.190863	1.25874
ENSOARG00020010351	74.0966	-1.70464	0.761723	-2.23787	0.0252297	0.190863	1.17044
ENSOARG00020011136	109.519	1.47695	0.657908	2.24492	0.0247731	0.190863	1.14286
ENSOARG00020011332	4574.19	-0.98687	0.465253	-2.12115	0.0339094	0.190863	1.56456
ENSOARG00020011537	92.4061	1.38561	0.648492	2.13666	0.0326254	0.190863	1.51551
ENSOARG00020013939	366.484	1.31363	0.618071	2.12537	0.0335554	0.190863	1.54722
ENSOARG00020015682	949.11	-1.28338	0.587964	-2.18276	0.0290538	0.190863	1.34536
ENSOARG00020015701	475.018	1.24792	0.564973	2.20881	0.0271875	0.190863	1.25818
ENSOARG00020016253	133.296	-1.50309	0.672568	-2.23485	0.0254272	0.190863	1.17044
ENSOARG00020017304	30.4378	-2.9106	1.27345	-2.28559	0.0222781	0.190863	1.0365
ENSOARG00020019799	1247.53	-1.19201	0.549756	-2.16825	0.0301394	0.190863	1.38744
ENSOARG00020021455	477.307	1.30665	0.596844	2.18926	0.0285782	0.190863	1.32479
ENSOARG00020022770	480.567	-1.02845	0.47166	-2.1805	0.0292207	0.190863	1.34778
ENSOARG00020024002	534.001	1.00555	0.461174	2.18041	0.0292268	0.190863	1.34778
ENSOARG00020025330	218.485	1.37634	0.62746	2.19351	0.0282709	0.190863	1.3073
ENSOARG00020009743	1936.51	1.15756	0.531131	2.17942	0.0293005	0.190884	1.34778
ENSOARG00020021076	2296.88	-1.11821	0.527631	-2.11931	0.0340643	0.191056	1.56456
ENSOARG00020022113	277.351	1.30011	0.572933	2.26922	0.0232551	0.191149	1.06694
ENSOARG00020014173	11276.7	1.37307	0.582234	2.35827	0.0183602	0.191185	0.841578
ENSOARG00020025630	2193.04	-1.34278	0.569433	-2.35811	0.0183683	0.191185	0.841578
ENSOARG00020021536	91.2271	1.66002	0.779117	2.13065	0.0331182	0.191307	1.51551
ENSOARG00020003938	27.5228	2.44644	0.980784	2.49437	0.012618	0.191624	0.576109
ENSOARG00020021327	546.801	1.14398	0.519353	2.20271	0.0276155	0.191918	1.25818
ENSOARG00020020512	136.445	-1.62083	0.716539	-2.26202	0.0236961	0.192541	1.07549
ENSOARG00020009969	495.562	-1.03048	0.474106	-2.17352	0.0297412	0.192608	1.34778
ENSOARG00020010835	281.304	1.30326	0.575516	2.2645	0.0235433	0.192608	1.06694
ENSOARG00020008084	31.7306	2.05035	0.943241	2.17373	0.0297258	0.192718	1.34552
ENSOARG00020023262	122.632	1.52702	0.685586	2.22732	0.0259258	0.19311	1.17044
ENSOARG00020026475	1080.63	-1.15918	0.533761	-2.17171	0.0298774	0.193147	1.34778
ENSOARG00020000632	3100.59	-1.21297	0.573296	-2.11579	0.0343625	0.193167	1.54903
ENSOARG00020002417	2003.37	-0.988141	0.457551	-2.15963	0.0308014	0.1932	1.38744
ENSOARG00020007215	86.055	1.69441	0.758219	2.23472	0.0254355	0.193223	1.14286
ENSOARG00020010396	149.231	-1.27531	0.580427	-2.19719	0.028007	0.193223	1.25818
ENSOARG00020010659	605.425	-1.15813	0.533508	-2.17078	0.0299477	0.193223	1.34536
ENSOARG00020016418	3154.82	-1.0563	0.51274	-2.06011	0.0393881	0.193223	1.76929
ENSOARG00020020444	122.779	1.41135	0.63424	2.22526	0.0260636	0.193223	1.17044
ENSOARG00020005557	148.098	1.41995	0.588697	2.41203	0.0158641	0.193275	0.710965
ENSOARG00020013188	372.017	-1.18673	0.561272	-2.11435	0.034485	0.193275	1.54722
ENSOARG00020020245	797.364	-1.12175	0.510741	-2.19632	0.0280688	0.193275	1.25818
ENSOARG00020006859	10073.8	-0.971368	0.472137	-2.05739	0.0396491	0.193766	1.76929
ENSOARG00020020760	406.542	1.10965	0.505593	2.19476	0.0281809	0.193766	1.25818
ENSOARG00020026098	16.3174	-2.96463	1.16638	-2.54174	0.0110304	0.193766	0.492299
ENSOARG00020013593	651.014	1.06796	0.503051	2.12297	0.0337562	0.193861	1.50327
ENSOARG00020016195	142.284	1.593	0.732868	2.17366	0.029731	0.193861	1.32479
ENSOARG00020022612	163.601	-1.42614	0.650113	-2.19367	0.0282588	0.193861	1.25818
ENSOARG00020023789	806.093	-1.12878	0.45915	-2.45842	0.013955	0.193904	0.620826
ENSOARG00020020380	9952.44	-1.00321	0.457682	-2.19193	0.0283847	0.19441	1.25874
ENSOARG00020006862	37.9412	-1.88365	0.844927	-2.22937	0.0257894	0.19443	1.14286
ENSOARG00020025799	479.209	1.25988	0.58204	2.16459	0.0304189	0.194701	1.34536
ENSOARG00020000529	567.122	1.18299	0.558474	2.11825	0.0341539	0.195035	1.50327
ENSOARG00020005431	84.0776	1.74096	0.770714	2.25889	0.0238903	0.195035	1.05065
ENSOARG00020006644	1707.55	-1.27573	0.541233	-2.35708	0.0184193	0.195035	0.811298
ENSOARG00020009959	276.396	-1.14756	0.509154	-2.25387	0.0242046	0.195035	1.06694
ENSOARG00020011240	3246.75	-1.245	0.59238	-2.10169	0.0355806	0.195035	1.56456
ENSOARG00020012817	30.4025	1.78763	0.789542	2.26413	0.0235658	0.195035	1.0365
ENSOARG00020025452	9.92353	4.214	1.7007	2.4778	0.0132195	0.195035	0.582037
ENSOARG00020015155	584.819	-1.05113	0.480547	-2.18735	0.0287168	0.19563	1.25818
ENSOARG00020006344	187.63	1.3061	0.601664	2.17082	0.0299449	0.195989	1.3073
ENSOARG00020010099	338.683	1.50392	0.668362	2.25016	0.0244391	0.195989	1.06694
ENSOARG00020025238	53.1278	1.73165	0.778764	2.22359	0.0261759	0.195989	1.14286
ENSOARG00020025726	488.043	-1.08705	0.503907	-2.15723	0.0309875	0.196608	1.34778
ENSOARG00020008104	209.314	1.23481	0.570782	2.16337	0.0305128	0.196841	1.32479
ENSOARG00020015863	1951.96	-1.33574	0.588606	-2.26933	0.0232483	0.196896	1.00764
ENSOARG00020016854	6073.09	1.11896	0.533854	2.096	0.0360823	0.196896	1.56456
ENSOARG00020025485	477.244	1.06603	0.507578	2.10024	0.0357078	0.196896	1.54722
ENSOARG00020015544	901.53	-1.24793	0.578977	-2.15541	0.0311297	0.197293	1.34536
ENSOARG00020023297	1376.39	-1.33705	0.589799	-2.26696	0.0233924	0.19783	1.00764
ENSOARG00020001760	293.361	1.44839	0.67073	2.15942	0.0308176	0.197919	1.32479
ENSOARG00020020566	59398.8	-1.03245	0.473681	-2.17962	0.0292854	0.197919	1.25874
ENSOARG00020021896	186.404	1.53019	0.689984	2.21771	0.0265745	0.197919	1.14286
ENSOARG00020003556	162.336	1.53577	0.711424	2.15873	0.0308715	0.197958	1.32479
ENSOARG00020010294	285.184	1.27888	0.592515	2.1584	0.030897	0.197958	1.32479
ENSOARG00020021326	925.556	-1.35822	0.57869	-2.34705	0.0189227	0.197958	0.811298
ENSOARG00020024974	11.8662	2.90519	1.14908	2.52827	0.0114628	0.197958	0.492299
ENSOARG00020000926	281.942	1.63228	0.749507	2.1778	0.0294209	0.198213	1.25818
ENSOARG00020002598	850.629	2.25755	0.923587	2.44433	0.0145121	0.198213	0.620826
ENSOARG00020023076	33.6403	1.87476	0.871583	2.15099	0.0314773	0.198213	1.34552
ENSOARG00020008550	665.258	-1.21596	0.558527	-2.17708	0.0294744	0.198256	1.25818
ENSOARG00020016150	2969.17	-1.17939	0.578356	-2.03922	0.0414282	0.198256	1.76929
ENSOARG00020015375	29.5536	-2.03548	0.903868	-2.25196	0.0243248	0.198384	1.0365
ENSOARG00020022399	1318.84	-1.1587	0.542091	-2.13747	0.0325597	0.198384	1.38744
ENSOARG00020001311	531.519	-0.983369	0.457927	-2.14744	0.0317584	0.198962	1.34778
ENSOARG00020007493	2546.05	-1.02066	0.488007	-2.09149	0.0364839	0.198962	1.54903
ENSOARG00020015789	342.718	1.11286	0.511779	2.17449	0.0296682	0.198989	1.25818
ENSOARG00020017329	1140.77	-1.29542	0.603708	-2.14577	0.0318916	0.199568	1.34778
ENSOARG00020020477	93.7087	1.29109	0.586582	2.20104	0.0277332	0.199707	1.17044
ENSOARG00020025122	29.1744	2.62824	1.18449	2.21887	0.0264953	0.199707	1.11766
ENSOARG00020002609	72.7436	1.73161	0.775371	2.23326	0.0255316	0.199762	1.07549
ENSOARG00020024810	150.542	1.52844	0.710412	2.15148	0.0314384	0.199762	1.32479
ENSOARG00020003624	892.444	-1.05595	0.48659	-2.17011	0.0299983	0.200286	1.25818
ENSOARG00020024253	288.857	-1.19051	0.507824	-2.34434	0.019061	0.200286	0.800144
ENSOARG00020024461	420.409	-1.32729	0.593893	-2.2349	0.0254242	0.200286	1.06694
ENSOARG00020018031	5477.97	1.39224	0.685406	2.03126	0.0422287	0.200382	1.76929
ENSOARG00020004372	149.946	-1.35552	0.568183	-2.38571	0.0170462	0.20108	0.710965
ENSOARG00020022897	3940.94	-1.47123	0.7059	-2.08419	0.0371425	0.20108	1.54903
ENSOARG00020003053	260.868	-1.40992	0.591311	-2.3844	0.0171071	0.201392	0.710965
ENSOARG00020003881	8038.27	-1.09102	0.503663	-2.16616	0.0302987	0.201392	1.25874
ENSOARG00020008460	57.7873	2.06004	0.866273	2.37805	0.0174045	0.201392	0.722675
ENSOARG00020008481	1554.02	-1.65016	0.775575	-2.12766	0.0333651	0.201392	1.38744
ENSOARG00020008563	5296.3	1.26756	0.609825	2.07856	0.037658	0.201392	1.56456
ENSOARG00020008125	261.492	1.31495	0.596897	2.20298	0.0275964	0.201806	1.14286
ENSOARG00020014171	38.1969	-1.54072	0.687667	-2.2405	0.0250583	0.201821	1.0365
ENSOARG00020026273	45.0402	1.59078	0.709998	2.24054	0.0250561	0.201821	1.0365
ENSOARG00020003617	409.605	-1.13179	0.527953	-2.14373	0.0320544	0.201875	1.32479
ENSOARG00020003878	2423.62	-1.01969	0.503555	-2.02498	0.0428689	0.201926	1.76929
ENSOARG00020014806	78.32	1.96907	0.894314	2.20177	0.0276819	0.201926	1.14286
ENSOARG00020005095	197.581	1.10456	0.514269	2.14782	0.031728	0.202149	1.3073
ENSOARG00020025044	113.588	-1.54393	0.739458	-2.08792	0.0368052	0.202166	1.51551
ENSOARG00020022070	522.097	-1.00039	0.462591	-2.16259	0.030573	0.202166	1.25818
ENSOARG00020024844	140.772	1.66659	0.749421	2.22384	0.0261593	0.20225	1.07549
ENSOARG00020016395	1839.26	-1.29837	0.611778	-2.12229	0.0338134	0.202533	1.38744
ENSOARG00020001172	49.0989	1.68785	0.76459	2.20752	0.0272776	0.202664	1.11766
ENSOARG00020016928	133.787	1.6849	0.807848	2.08566	0.0370091	0.202664	1.51551
ENSOARG00020019417	8259.68	-1.05357	0.521161	-2.02158	0.04322	0.202664	1.76929
ENSOARG00020003133	1394.13	1.27194	0.596329	2.13296	0.0329283	0.20283	1.34536
ENSOARG00020017689	50.9088	1.89063	0.856863	2.20645	0.0273524	0.20283	1.11766
ENSOARG00020007088	196.364	1.12123	0.519319	2.15905	0.0308467	0.202959	1.25818
ENSOARG00020020714	216.42	1.31046	0.611296	2.14375	0.0320531	0.202959	1.3073
ENSOARG00020023940	1882.14	-1.18666	0.528556	-2.24509	0.0247623	0.203307	1.00764
ENSOARG00020021551	1344.54	-0.987823	0.463532	-2.13108	0.0330829	0.203325	1.34536
ENSOARG00020014199	692.855	-1.08222	0.507967	-2.13049	0.0331313	0.203508	1.34536
ENSOARG00020013680	492.606	-1.36751	0.564007	-2.42463	0.015324	0.203864	0.620826
ENSOARG00020021629	169.375	1.15713	0.540506	2.14084	0.0322873	0.20387	1.3073
ENSOARG00020008684	346.702	1.27677	0.597972	2.13516	0.032748	0.203935	1.32479
ENSOARG00020026049	145.174	-1.90637	0.890739	-2.14021	0.0323378	0.203961	1.3073
ENSOARG00020015175	256.242	1.17222	0.547774	2.13997	0.0323571	0.203968	1.3073
ENSOARG00020014465	146.186	1.68467	0.781749	2.155	0.0311615	0.203987	1.25818
ENSOARG00020005094	849.69	0.998132	0.463417	2.15385	0.0312516	0.20412	1.25818
ENSOARG00020005751	273.033	-1.72863	0.810186	-2.13363	0.0328734	0.20412	1.32479
ENSOARG00020020472	3673.9	1.6748	0.724944	2.31025	0.0208742	0.20412	0.841578
ENSOARG00020026388	278.553	-1.19169	0.558616	-2.13329	0.0329012	0.20412	1.32479
ENSOARG00020013942	93.7536	1.55061	0.746045	2.07845	0.0376683	0.204142	1.51551
ENSOARG00020014995	15.4046	-3.65079	1.45744	-2.50493	0.0122477	0.20422	0.492299
ENSOARG00020020008	75.1388	1.98738	0.897384	2.21464	0.026785	0.204324	1.07549
ENSOARG00020012922	72.244	1.62643	0.74573	2.18099	0.0291845	0.204453	1.17044
ENSOARG00020003735	367.213	1.55444	0.722513	2.15143	0.0314424	0.204796	1.25818
ENSOARG00020000338	96.074	1.75068	0.799835	2.1888	0.0286113	0.204846	1.14286
ENSOARG00020002856	50.7772	1.65144	0.751508	2.19751	0.0279842	0.204846	1.11766
ENSOARG00020015846	15.6047	2.66255	1.17356	2.26878	0.0232815	0.204846	0.930765
ENSOARG00020003995	224.565	1.44084	0.670179	2.14994	0.0315599	0.205106	1.25818
ENSOARG00020005667	29.2038	-1.66264	0.760203	-2.1871	0.0287353	0.205478	1.14286
ENSOARG00020003119	262.21	1.11234	0.522866	2.12739	0.033388	0.205757	1.32479
ENSOARG00020025981	179.964	1.42638	0.668822	2.13268	0.0329509	0.205757	1.3073
ENSOARG00020006388	1273.7	-1.23966	0.584563	-2.12065	0.0339509	0.20589	1.34536
ENSOARG00020009939	19.9931	2.69265	1.05554	2.55097	0.0107422	0.205964	0.425055
ENSOARG00020012291	430.601	1.19779	0.563271	2.12649	0.0334629	0.205964	1.32479
ENSOARG00020010031	1141.68	-1.20362	0.519665	-2.31615	0.02055	0.206203	0.811298
ENSOARG00020014101	1863.25	-1.27499	0.601599	-2.11933	0.0340624	0.206203	1.34536
ENSOARG00020009298	139.329	1.22592	0.555456	2.20705	0.0273105	0.206609	1.07549
ENSOARG00020008761	123.907	1.67935	0.769423	2.18261	0.0290647	0.206803	1.14286
ENSOARG00020008275	45.2834	-1.99696	0.911386	-2.19113	0.0284426	0.206825	1.11766
ENSOARG00020006936	221.574	-1.83265	0.855553	-2.14207	0.0321881	0.207649	1.25818
ENSOARG00020013806	440.631	-1.20213	0.566719	-2.12121	0.0339039	0.207649	1.32479
ENSOARG00020019411	232.99	1.49826	0.687223	2.18016	0.0292457	0.207649	1.14286
ENSOARG00020012861	260.051	-1.27199	0.598213	-2.12631	0.0334774	0.207666	1.3073
ENSOARG00020004870	13982	-1.44078	0.720036	-2.00098	0.0453949	0.20795	1.76929
ENSOARG00020022772	59.9322	-2.34314	0.995244	-2.35434	0.0185559	0.207994	0.722675
ENSOARG00020021873	328.397	1.33731	0.630912	2.11964	0.0340361	0.208002	1.32479
ENSOARG00020005640	26.3877	-2.59275	1.06424	-2.43626	0.0148402	0.208434	0.576109
ENSOARG00020022222	69.4764	1.46703	0.662213	2.21534	0.0267369	0.208611	1.0365
ENSOARG00020017029	202.22	1.25019	0.59052	2.11709	0.034252	0.208977	1.32479
ENSOARG00020005038	1155.01	0.992246	0.472949	2.098	0.0359052	0.209056	1.38744
ENSOARG00020000324	167.931	-1.17381	0.539791	-2.17456	0.0296632	0.209216	1.14286
ENSOARG00020008014	487.658	-1.2399	0.515236	-2.40648	0.0161072	0.209216	0.620826
ENSOARG00020017381	33.5238	2.3319	1.05374	2.21298	0.0268993	0.209216	1.0365
ENSOARG00020026462	62.4516	1.51528	0.684683	2.21311	0.0268902	0.209216	1.0365
ENSOARG00020025260	671.32	-1.098	0.520651	-2.10891	0.0349527	0.209303	1.34536
ENSOARG00020007298	15.3744	3.21708	1.32261	2.43236	0.0150008	0.209655	0.576109
ENSOARG00020006251	19.6206	2.92123	1.20333	2.42763	0.015198	0.209749	0.582037
ENSOARG00020017506	1338.81	-1.07183	0.482491	-2.22145	0.0263205	0.209749	1.00764
ENSOARG00020019659	132.457	1.31477	0.596108	2.20559	0.0274128	0.209749	1.05065
ENSOARG00020020230	522.552	-1.01541	0.492547	-2.06156	0.0392496	0.209749	1.50327
ENSOARG00020024358	628.418	-0.984116	0.46703	-2.10718	0.035102	0.209749	1.34536
ENSOARG00020006870	5242.21	1.16186	0.582974	1.99299	0.0462626	0.20979	1.76929
ENSOARG00020007250	1237.5	-1.11081	0.500151	-2.22095	0.0263543	0.20979	1.00764
ENSOARG00020005226	259.85	-1.14927	0.538941	-2.13247	0.0329686	0.20984	1.25818
ENSOARG00020006685	98.4717	1.77795	0.806693	2.204	0.0275245	0.20984	1.05065
ENSOARG00020020442	266.972	-1.10214	0.516742	-2.13287	0.0329357	0.20984	1.25818
ENSOARG00020001262	395.192	1.31842	0.624871	2.10991	0.0348661	0.210441	1.32479
ENSOARG00020004288	903.638	-1.31728	0.626159	-2.10374	0.035401	0.210441	1.34536
ENSOARG00020025335	79.5068	1.64112	0.745233	2.20216	0.0276542	0.210441	1.05065
ENSOARG00020001314	63.6321	1.75776	0.835735	2.10325	0.0354439	0.210495	1.34552
ENSOARG00020012953	100.713	1.59428	0.727295	2.19207	0.0283744	0.210706	1.07549
ENSOARG00020000398	43165.1	1.23656	0.621876	1.98844	0.0467631	0.210734	1.76929
ENSOARG00020008677	98.2046	1.57406	0.718334	2.19127	0.0284324	0.210734	1.07549
ENSOARG00020014618	1496.93	1.07446	0.467187	2.29984	0.0214571	0.210734	0.811298
ENSOARG00020015518	1345.7	-1.37038	0.618282	-2.21644	0.0266616	0.210734	1.00764
ENSOARG00020016257	370.826	1.1157	0.545855	2.04395	0.0409581	0.210734	1.54722
ENSOARG00020018520	1099.06	-1.2975	0.564163	-2.29988	0.0214551	0.210734	0.811298
ENSOARG00020008074	69.2852	-1.56754	0.720769	-2.17481	0.029644	0.210766	1.11766
ENSOARG00020008767	99.5489	-1.28246	0.592248	-2.16541	0.0303566	0.210766	1.14286
ENSOARG00020009083	70.4599	1.67813	0.761286	2.20433	0.0275008	0.210766	1.0365
ENSOARG00020011853	471.417	1.3488	0.614966	2.19328	0.028287	0.210766	1.06694
ENSOARG00020016757	391.496	-1.22858	0.577502	-2.12741	0.0333858	0.210766	1.25818
ENSOARG00020023222	258.839	-1.43235	0.673369	-2.12714	0.0334083	0.210766	1.25818
ENSOARG00020001792	373.069	-1.03889	0.474062	-2.19147	0.0284175	0.211115	1.06694
ENSOARG00020006271	47714.8	-0.920517	0.451901	-2.03699	0.0416514	0.211115	1.56456
ENSOARG00020010997	247.004	-1.12311	0.52849	-2.12514	0.0335752	0.211406	1.25818
ENSOARG00020003860	1608.24	-1.10331	0.525951	-2.09775	0.0359275	0.211445	1.34536
ENSOARG00020011316	7282.28	-1.26963	0.622672	-2.039	0.0414501	0.211759	1.54903
ENSOARG00020014316	398.371	-1.06861	0.508332	-2.10218	0.0355372	0.211941	1.32479
ENSOARG00020022909	1657.66	-1.25063	0.565579	-2.21123	0.0270197	0.211941	1.00764
ENSOARG00020023313	144.442	-1.26742	0.596885	-2.12339	0.033721	0.211941	1.25818
ENSOARG00020003828	23.8305	-2.48203	1.00197	-2.47715	0.0132436	0.212092	0.492299
ENSOARG00020006098	10.8803	-2.85267	1.17835	-2.42091	0.0154819	0.212092	0.576109
ENSOARG00020017442	279.608	1.22467	0.559739	2.18793	0.0286747	0.212092	1.06694
ENSOARG00020025767	4505.67	0.911198	0.448276	2.03267	0.0420854	0.212092	1.56456
ENSOARG00020025804	233.015	1.25707	0.582044	2.15975	0.0307918	0.212303	1.14286
ENSOARG00020003919	234.869	1.53637	0.724512	2.12055	0.0339594	0.212441	1.25818
ENSOARG00020011339	16220.7	-1.07788	0.473081	-2.27842	0.0227013	0.212441	0.841578
ENSOARG00020012975	24.9366	2.12976	0.880374	2.41915	0.0155569	0.212441	0.576109
ENSOARG00020008606	730.852	2.06784	0.975483	2.11981	0.0340224	0.212445	1.25818
ENSOARG00020013786	1139.27	-1.27692	0.557308	-2.29123	0.0219501	0.212445	0.811298
ENSOARG00020017963	7058.52	1.28302	0.630497	2.03494	0.0418571	0.212445	1.54903
ENSOARG00020021075	172.314	-1.39436	0.662714	-2.10401	0.0353774	0.212445	1.3073
ENSOARG00020006831	1012.3	-1.43924	0.628484	-2.29001	0.0220206	0.212967	0.811298
ENSOARG00020002474	42.118	-2.09557	1.0027	-2.08994	0.0366232	0.213225	1.34552
ENSOARG00020008818	2902.62	1.19797	0.606251	1.97603	0.0481517	0.213225	1.76929
ENSOARG00020023125	2845.65	-0.991634	0.488989	-2.02793	0.0425675	0.213225	1.56456
ENSOARG00020015256	1599.04	-1.85083	0.809202	-2.28723	0.0221821	0.213969	0.811298
ENSOARG00020017216	76005.6	-0.909189	0.44792	-2.0298	0.0423769	0.213969	1.54903
ENSOARG00020026136	25.35	2.48865	1.03228	2.41084	0.0159158	0.213969	0.582037
ENSOARG00020021055	8.65626	-4.10312	1.62642	-2.52279	0.0116428	0.214123	0.425055
ENSOARG00020017153	40.178	-2.08448	0.968309	-2.1527	0.0313424	0.214162	1.14286
ENSOARG00020024819	571.452	0.983943	0.471485	2.0869	0.0368971	0.214162	1.34536
ENSOARG00020024194	62.0704	-1.8696	0.865033	-2.16131	0.0306717	0.214184	1.11766
ENSOARG00020003354	51.9225	1.91822	0.876011	2.18972	0.0285442	0.214273	1.0365
ENSOARG00020011413	1503.54	1.21922	0.533813	2.28398	0.0223726	0.214273	0.811298
ENSOARG00020015227	8.32616	3.20517	1.43613	2.23181	0.0256278	0.214273	0.930765
ENSOARG00020015968	12.139	4.11758	1.70756	2.41139	0.0158919	0.214273	0.576109
ENSOARG00020016504	149.064	1.28943	0.614776	2.0974	0.0359579	0.214273	1.3073
ENSOARG00020017606	160.16	-1.10906	0.525114	-2.11204	0.0346833	0.214273	1.25818
ENSOARG00020023569	417.789	1.01984	0.468057	2.17887	0.0293412	0.214273	1.06694
ENSOARG00020023691	140.745	-1.27498	0.586272	-2.17473	0.0296504	0.214273	1.07549
ENSOARG00020024799	266.626	1.17214	0.544852	2.15129	0.0314532	0.214273	1.14286
ENSOARG00020005646	18755.1	-1.13417	0.499803	-2.26923	0.023254	0.214409	0.841578
ENSOARG00020014215	7056.85	-1.00459	0.51004	-1.96963	0.0488812	0.214409	1.76929
ENSOARG00020001403	365.92	-1.21786	0.532806	-2.28575	0.0222687	0.21449	0.800144
ENSOARG00020005777	417.85	-1.2224	0.534634	-2.28642	0.0222299	0.21449	0.800144
ENSOARG00020006888	1646.74	-1.01178	0.488874	-2.06961	0.0384892	0.21449	1.38744
ENSOARG00020009058	4451.69	-1.13028	0.574186	-1.96849	0.0490115	0.21449	1.76929
ENSOARG00020009287	221.446	-1.46912	0.630383	-2.33052	0.0197788	0.21449	0.710965
ENSOARG00020011568	34.1104	-1.81519	0.830506	-2.18564	0.028842	0.21449	1.0365
ENSOARG00020014460	228.308	1.64199	0.764159	2.14876	0.0316534	0.21449	1.14286
ENSOARG00020015823	356.044	-1.15073	0.568611	-2.02375	0.0429954	0.21449	1.54722
ENSOARG00020016978	192.5	-1.42934	0.66542	-2.14803	0.0317113	0.21449	1.14286
ENSOARG00020018893	105.032	1.48558	0.68389	2.17225	0.0298366	0.21449	1.07549
ENSOARG00020022711	886.682	-1.02188	0.501768	-2.03657	0.0416935	0.21449	1.50327
ENSOARG00020023408	558.878	-1.19559	0.587242	-2.03594	0.0417567	0.21449	1.50327
ENSOARG00020024464	2095.2	-0.968083	0.492189	-1.96689	0.0491957	0.21449	1.76929
ENSOARG00020000930	45.8537	1.645	0.753104	2.18429	0.0289409	0.214629	1.0365
ENSOARG00020015035	1542.97	-1.06215	0.51368	-2.06772	0.0386659	0.214629	1.38744
ENSOARG00020021218	21.9446	-2.55883	1.01689	-2.51634	0.0118582	0.214629	0.425055
ENSOARG00020021564	34.5909	-2.06902	0.994648	-2.08015	0.0375119	0.214629	1.34552
ENSOARG00020022042	89.9862	-1.327	0.653518	-2.03054	0.0423012	0.214629	1.51551
ENSOARG00020013107	77.7264	1.67607	0.785141	2.13474	0.0327822	0.215184	1.17044
ENSOARG00020017448	1623.11	1.27508	0.617462	2.06503	0.0389199	0.215402	1.38744
ENSOARG00020003357	66.3772	1.58987	0.685153	2.32047	0.0203157	0.215753	0.722675
ENSOARG00020010246	432.24	1.14915	0.546507	2.10271	0.035491	0.215824	1.25818
ENSOARG00020014797	8021.02	-1.14349	0.543755	-2.10296	0.0354697	0.215824	1.25874
ENSOARG00020017879	14539.1	-1.02323	0.50713	-2.01768	0.0436242	0.215824	1.54903
ENSOARG00020022124	383.403	-1.08543	0.516258	-2.10249	0.0355101	0.215824	1.25818
ENSOARG00020022312	2727.07	-1.06668	0.528877	-2.01688	0.043708	0.215824	1.54903
ENSOARG00020022416	127.337	1.54227	0.720258	2.14127	0.032252	0.215824	1.14286
ENSOARG00020023673	19.7421	2.13308	0.888756	2.40007	0.0163919	0.215824	0.582037
ENSOARG00020006339	15.8271	3.06821	1.24776	2.45898	0.0139334	0.216157	0.492299
ENSOARG00020014150	881.134	1.34486	0.663213	2.0278	0.0425812	0.216157	1.50327
ENSOARG00020015086	980.667	1.0696	0.518936	2.06114	0.0392892	0.216157	1.38744
ENSOARG00020015634	2037.13	0.986649	0.478657	2.06129	0.0392756	0.216157	1.38744
ENSOARG00020006364	144.932	1.3527	0.650651	2.079	0.0376178	0.216242	1.32479
ENSOARG00020018934	45.1207	2.40288	1.0372	2.3167	0.0205203	0.216242	0.722675
ENSOARG00020020266	63.3558	-2.05463	0.960426	-2.13929	0.0324125	0.216242	1.14286
ENSOARG00020021271	71.8198	1.36848	0.642629	2.1295	0.0332132	0.216242	1.17044
ENSOARG00020004529	151.939	-1.32777	0.571744	-2.32232	0.0202157	0.216381	0.710965
ENSOARG00020017694	111.897	-1.33417	0.62405	-2.13792	0.0325232	0.216381	1.14286
ENSOARG00020024877	37.1433	-1.64612	0.766737	-2.14692	0.0317995	0.216381	1.11766
ENSOARG00020000523	31.2501	-2.12727	0.995233	-2.13746	0.0325606	0.216518	1.14286
ENSOARG00020014925	46.978	1.87216	0.860316	2.17613	0.0295456	0.216519	1.0365
ENSOARG00020001382	53.1205	1.4343	0.692825	2.07022	0.038432	0.216749	1.34552
ENSOARG00020019662	21.4224	2.61428	1.06459	2.45566	0.0140625	0.216749	0.492299
ENSOARG00020017196	1043.98	-1.24136	0.546932	-2.26968	0.0232273	0.21713	0.811298
ENSOARG00020016287	57.7278	-1.72746	0.834942	-2.06895	0.0385504	0.217179	1.34552
ENSOARG00020022992	329.167	1.72418	0.83093	2.075	0.0379865	0.217239	1.32479
ENSOARG00020012115	1004.23	-1.71544	0.785296	-2.18445	0.028929	0.2174	1.00764
ENSOARG00020024584	743.646	1.3441	0.650326	2.06681	0.0387516	0.217611	1.34778
ENSOARG00020019392	166.265	1.16986	0.548316	2.13356	0.0328792	0.217628	1.14286
ENSOARG00020008047	8.29951	-3.65166	1.45786	-2.5048	0.0122519	0.217911	0.425055
ENSOARG00020008363	385.783	-1.10897	0.529659	-2.09375	0.0362824	0.217911	1.25818
ENSOARG00020025324	173.599	1.33627	0.643081	2.07792	0.0377169	0.217911	1.3073
ENSOARG00020002878	1598.6	1.04556	0.50965	2.05151	0.0402169	0.218419	1.38744
ENSOARG00020003955	36.3357	1.60041	0.737597	2.16977	0.0300244	0.218419	1.0365
ENSOARG00020005421	70.1352	1.98256	0.858492	2.30935	0.0209242	0.218419	0.722675
ENSOARG00020012051	1143	-1.40797	0.645557	-2.18102	0.0291819	0.218419	1.00764
ENSOARG00020015244	927.119	1.2694	0.560476	2.26486	0.0235214	0.218419	0.811298
ENSOARG00020006299	3672.02	1.00712	0.517223	1.94717	0.0515145	0.219239	1.76929
ENSOARG00020006950	222.643	-1.54702	0.727547	-2.12635	0.0334741	0.220163	1.14286
ENSOARG00020009150	175.163	-1.21964	0.588651	-2.07192	0.0382727	0.220163	1.3073
ENSOARG00020018352	1573.42	-1.26708	0.618968	-2.04708	0.0406498	0.220163	1.38744
ENSOARG00020021378	1012.61	0.959035	0.465481	2.06031	0.039369	0.220163	1.34536
ENSOARG00020002457	82.2943	1.62753	0.753762	2.15921	0.0308342	0.220423	1.05065
ENSOARG00020019323	8.6905	3.26488	1.3671	2.38819	0.0169317	0.220625	0.576109
ENSOARG00020009690	1097.72	-1.13814	0.553284	-2.05707	0.0396799	0.220673	1.34778
ENSOARG00020009740	160.97	1.34031	0.630879	2.12451	0.0336278	0.220673	1.14286
ENSOARG00020022720	56.4645	-2.4102	1.13451	-2.12444	0.033633	0.220673	1.14286
ENSOARG00020013174	120.07	1.66141	0.773462	2.14802	0.031712	0.220899	1.07549
ENSOARG00020007810	2628.38	1.14353	0.589095	1.94116	0.0522385	0.220988	1.76929
ENSOARG00020022454	494.064	1.2766	0.621025	2.05564	0.0398173	0.220988	1.34778
ENSOARG00020024472	1580.34	-1.19698	0.530189	-2.25765	0.0239673	0.220988	0.811298
ENSOARG00020002689	51.4373	1.67008	0.72591	2.30067	0.0214102	0.221418	0.722675
ENSOARG00020016686	8.68679	-4.15679	1.74551	-2.38142	0.017246	0.221418	0.582037
ENSOARG00020018848	210.472	1.41008	0.611582	2.30562	0.0211319	0.221883	0.710965
ENSOARG00020023238	654.153	1.16891	0.569114	2.05391	0.0399841	0.221883	1.34536
ENSOARG00020010167	195.498	-1.35775	0.65265	-2.08037	0.0374917	0.221886	1.25818
ENSOARG00020015716	2575.6	-1.31893	0.680648	-1.93776	0.0526526	0.221886	1.76929
ENSOARG00020021146	410.748	-0.956793	0.46463	-2.05926	0.0394696	0.221886	1.32479
ENSOARG00020024225	1522.38	1.42385	0.697825	2.04041	0.0413091	0.221886	1.38744
ENSOARG00020025156	2051.77	-1.11587	0.546757	-2.04089	0.0412613	0.221886	1.38744
ENSOARG00020007146	209.499	-1.30709	0.634981	-2.05847	0.0395449	0.222158	1.32479
ENSOARG00020001072	98.9335	1.49767	0.74864	2.00053	0.0454435	0.222208	1.51551
ENSOARG00020003620	80.8086	-1.44428	0.67452	-2.14119	0.0322584	0.222208	1.07549
ENSOARG00020004535	585.833	1.27419	0.635802	2.00406	0.0450635	0.222208	1.50327
ENSOARG00020005540	1006.98	-1.23255	0.547296	-2.25208	0.0243175	0.222208	0.811298
ENSOARG00020006182	542.913	1.20897	0.589513	2.0508	0.0402866	0.222208	1.34778
ENSOARG00020013164	68.6695	1.56443	0.762608	2.05142	0.0402262	0.222208	1.34552
ENSOARG00020014711	24122.9	-0.99248	0.498507	-1.99091	0.0464911	0.222208	1.54903
ENSOARG00020018136	206.971	1.54223	0.670002	2.30183	0.0213448	0.222208	0.710965
ENSOARG00020018653	1021.94	-1.00369	0.463026	-2.16768	0.0301828	0.222208	1.00764
ENSOARG00020019399	2253.09	1.29244	0.577674	2.23732	0.0252653	0.222208	0.841578
ENSOARG00020026196	46.2514	2.12821	0.926936	2.29596	0.021678	0.222208	0.722675
ENSOARG00020022775	605.876	1.08748	0.54287	2.00321	0.0451545	0.222208	1.50327
ENSOARG00020005272	193.781	1.1816	0.575091	2.05464	0.0399138	0.222546	1.32479
ENSOARG00020023605	1120.66	-0.989208	0.456798	-2.16553	0.0303473	0.222546	1.00764
ENSOARG00020023985	204.829	1.17238	0.568996	2.06044	0.0393562	0.222546	1.3073
ENSOARG00020009489	78.624	1.32681	0.664123	1.99784	0.0457344	0.222575	1.51551
[truncated: 12,852 more rows]

## Sheet: Study 2
Supplementary File S2: Results of the differential expression analysis per study along with meta-analysis.
ID	baseMean	log2FoldChange	lfcSE	stat	pvalue	padj	weight
ENSOARG00020011536	21.1354	22.2984	2.45848	9.07	1.19e-19	7.7e-16	1.00898
ENSOARG00020023518	20.7366	22.272	2.46462	9.0367	1.61e-19	7.7e-16	1.29294
ENSOARG00020019164	241.386	5.70118	0.856301	6.65792	2.78e-11	7.09e-08	1.61016
ENSOARG00020014144	115.507	5.87643	0.963125	6.10142	1.05e-09	2.19e-06	1.48023
ENSOARG00020020757	26.3196	22.604	3.9102	5.78079	7.44e-09	1.39e-05	1.31903
ENSOARG00020008243	39.0862	9.84297	1.82769	5.38548	7.23e-08	0.000117551	1.26379
ENSOARG00020006912	43.6245	6.43674	1.22308	5.26272	1.42e-07	0.000173464	1.44216
ENSOARG00020026360	54.2178	4.70601	0.900579	5.22554	1.74e-07	0.000175952	1.52196
ENSOARG00020025757	37.237	7.16458	1.3722	5.22122	1.78e-07	0.000192794	1.26379
ENSOARG00020012618	82.3271	-6.33351	1.24629	-5.0819	3.74e-07	0.000311651	1.47924
ENSOARG00020014094	80.1652	4.48171	0.891518	5.02706	4.98e-07	0.000377631	1.47924
ENSOARG00020021607	1300.62	4.49925	0.883647	5.09168	3.55e-07	0.000380489	0.958942
ENSOARG00020017328	35.836	6.20394	1.2405	5.00116	5.7e-07	0.000418031	1.29366
ENSOARG00020001505	28.1645	7.72305	1.56473	4.9357	7.99e-07	0.000544005	1.29366
ENSOARG00020010029	80.6959	-7.79456	1.58022	-4.93258	8.12e-07	0.000562001	1.18761
ENSOARG00020010096	78.8915	-7.76237	1.59258	-4.87408	1.09e-06	0.000569831	1.47924
ENSOARG00020009339	91.8143	-5.51458	1.13766	-4.84731	1.25e-06	0.00061396	1.47924
ENSOARG00020010508	44.6007	4.54042	0.961036	4.7245	2.31e-06	0.00106884	1.47924
ENSOARG00020013714	37.7347	-7.66442	1.60311	-4.78098	1.74e-06	0.00111358	1.00898
ENSOARG00020019826	75.4787	-5.35244	1.14011	-4.69467	2.67e-06	0.00111358	1.47924
ENSOARG00020018601	41.5175	6.27723	1.3276	4.72826	2.26e-06	0.00112017	1.18761
ENSOARG00020025466	40.9036	5.76209	1.23391	4.66977	3.02e-06	0.00130707	1.29366
ENSOARG00020025780	40.4753	6.40793	1.39042	4.60864	4.05e-06	0.00168054	1.29366
ENSOARG00020023364	181.787	3.31885	0.727756	4.56039	5.11e-06	0.00171208	1.533
ENSOARG00020009978	43.5708	-7.87139	1.70985	-4.60356	4.15e-06	0.00172581	1.18761
ENSOARG00020009246	318.749	3.57139	0.792735	4.50515	6.63e-06	0.002057	1.52196
ENSOARG00020017815	24.5481	5.96982	1.31703	4.5328	5.82e-06	0.002057	1.29294
ENSOARG00020011056	45.6592	4.43692	0.978634	4.53379	5.79e-06	0.0020791	1.18761
ENSOARG00020011296	59.5643	4.04283	0.89996	4.49223	7.05e-06	0.0020791	1.44216
ENSOARG00020016954	43.0004	5.61189	1.25155	4.48395	7.33e-06	0.00208942	1.44216
ENSOARG00020007944	265.31	3.4971	0.787022	4.44346	8.85e-06	0.00219218	1.60702
ENSOARG00020019802	198.8	4.26191	0.958595	4.446	8.75e-06	0.00220011	1.533
ENSOARG00020008452	31.2555	-7.39191	1.65429	-4.46833	7.88e-06	0.00227942	1.29294
ENSOARG00020004475	108.439	-3.76176	0.865075	-4.34848	1.37e-05	0.00247053	1.98802
ENSOARG00020020444	56.1102	4.15543	0.941238	4.41485	1.01e-05	0.00247053	1.44216
ENSOARG00020026161	95.7518	3.73673	0.858393	4.35317	1.34e-05	0.00299961	1.533
ENSOARG00020025324	48.5858	4.27492	0.985808	4.33646	1.45e-05	0.00317224	1.52196
ENSOARG00020005443	47.2515	-6.08584	1.40223	-4.34013	1.42e-05	0.00320571	1.44216
ENSOARG00020005921	2018.8	-3.07439	0.697548	-4.40743	1.05e-05	0.00343665	0.938671
ENSOARG00020021045	59.2548	3.95662	0.917817	4.3109	1.63e-05	0.00343665	1.44216
ENSOARG00020021453	39.1489	-7.71527	1.7589	-4.38641	1.15e-05	0.00343665	1.00898
ENSOARG00020004397	68.1614	-4.86206	1.13152	-4.29692	1.73e-05	0.00343902	1.47924
ENSOARG00020011060	24.7262	5.85214	1.34207	4.36053	1.3e-05	0.00353365	1.00898
ENSOARG00020016261	55.5488	4.08252	0.953592	4.28121	1.86e-05	0.00353365	1.44216
ENSOARG00020022355	33.6175	6.84647	1.58699	4.31413	1.6e-05	0.00353365	1.29366
ENSOARG00020000127	365.164	-3.81938	0.903501	-4.22731	2.37e-05	0.00399395	1.52196
ENSOARG00020021234	96.6687	4.80026	1.13428	4.232	2.32e-05	0.00399395	1.52196
ENSOARG00020025862	107.746	3.54945	0.839363	4.22874	2.35e-05	0.00399395	1.52196
ENSOARG00020001702	101.857	-4.61805	1.11264	-4.15055	3.32e-05	0.00403584	1.98802
ENSOARG00020013936	78.4079	4.1601	0.974587	4.26858	1.97e-05	0.00403584	1.18761
ENSOARG00020017568	97.0622	-3.99617	0.947307	-4.21845	2.46e-05	0.00403584	1.533
ENSOARG00020006739	62.0046	4.59202	1.09095	4.20918	2.56e-05	0.00411077	1.47924
ENSOARG00020006198	85.8647	4.04527	0.956865	4.22763	2.36e-05	0.00420039	1.30878
ENSOARG00020003148	63.8815	4.21609	0.998047	4.22434	2.4e-05	0.00461007	1.18761
ENSOARG00020000993	124.621	4.09647	0.989156	4.14138	3.45e-05	0.00483054	1.47924
ENSOARG00020004609	67.6266	-6.68852	1.59589	-4.1911	2.78e-05	0.00483054	1.18761
ENSOARG00020005923	34.7988	6.61357	1.58615	4.16958	3.05e-05	0.00483054	1.31903
ENSOARG00020008981	28.1356	-7.23882	1.73112	-4.18159	2.89e-05	0.00483054	1.31903
ENSOARG00020013929	45.007	4.1696	1.00132	4.16409	3.13e-05	0.00483054	1.30878
ENSOARG00020014499	37.1071	-6.66851	1.5924	-4.18772	2.82e-05	0.00483054	1.29294
ENSOARG00020025736	38.7606	4.78514	1.14791	4.16858	3.07e-05	0.00483054	1.29294
ENSOARG00020015526	17.8925	6.38446	1.53535	4.15832	3.21e-05	0.00498804	1.27894
ENSOARG00020003558	143.122	3.34504	0.817597	4.0913	4.29e-05	0.00551933	1.52196
ENSOARG00020012134	427.749	-3.62177	0.884707	-4.09375	4.24e-05	0.00552742	1.48023
ENSOARG00020014533	3817.36	-3.58632	0.856272	-4.1883	2.81e-05	0.00556287	0.958942
ENSOARG00020002135	73.5239	-5.46842	1.32395	-4.13038	3.62e-05	0.00561525	1.18761
ENSOARG00020023854	62.0481	5.01699	1.23078	4.07626	4.58e-05	0.00561525	1.52196
ENSOARG00020020315	34.4267	-6.55315	1.59516	-4.10814	3.99e-05	0.00572586	1.26379
ENSOARG00020003408	79.8954	-4.21174	1.03154	-4.08297	4.45e-05	0.00574142	1.30878
ENSOARG00020005322	640.809	-3.4999	0.862714	-4.05684	4.97e-05	0.00574142	1.48023
ENSOARG00020016179	934.927	3.23039	0.775402	4.16608	3.1e-05	0.00574142	0.958479
ENSOARG00020016902	24.6024	7.43576	1.81752	4.09115	4.29e-05	0.00574142	1.29366
ENSOARG00020023885	588.575	-3.99648	0.98519	-4.05656	4.98e-05	0.00574142	1.48023
ENSOARG00020004062	126.415	3.39574	0.8408	4.0387	5.37e-05	0.005809	1.52196
ENSOARG00020012603	958.07	-4.73223	1.14085	-4.14798	3.35e-05	0.005809	0.958479
ENSOARG00020007950	365.33	-2.85829	0.711758	-4.01582	5.92e-05	0.00598399	1.60702
ENSOARG00020019411	249.167	3.46613	0.866132	4.00185	6.29e-05	0.0062662	1.60702
ENSOARG00020007651	173.487	3.64406	0.906989	4.01776	5.88e-05	0.00627798	1.48023
ENSOARG00020023719	71.1125	3.6194	0.900336	4.02005	5.82e-05	0.00630059	1.44216
ENSOARG00020021999	2854.15	3.06283	0.74523	4.10991	3.96e-05	0.00636524	0.958942
ENSOARG00020017516	1688.83	-2.87657	0.701544	-4.10034	4.13e-05	0.00654208	0.960466
ENSOARG00020001855	24.2648	7.41079	1.84219	4.02282	5.75e-05	0.00660715	1.29366
ENSOARG00020001913	25.4832	5.94055	1.47835	4.01837	5.86e-05	0.00660715	1.31903
ENSOARG00020013998	50.085	3.77636	0.947102	3.98727	6.68e-05	0.00672657	1.44216
ENSOARG00020016481	106.207	3.56285	0.89624	3.97533	7.03e-05	0.00672657	1.52196
ENSOARG00020001904	4021.38	-3.81281	0.937574	-4.06668	4.77e-05	0.00713746	0.958479
ENSOARG00020004572	3268.68	-3.75423	0.930161	-4.03611	5.43e-05	0.00719756	1.04392
ENSOARG00020016047	32.8352	6.43552	1.59213	4.04208	5.3e-05	0.00719756	1.00898
ENSOARG00020019688	33.4325	-7.4874	1.87512	-3.99302	6.52e-05	0.00719756	1.26379
ENSOARG00020020443	517.029	-3.70906	0.937907	-3.95461	7.67e-05	0.00719756	1.47924
ENSOARG00020017182	311.994	-3.99523	1.01788	-3.92505	8.67e-05	0.00730092	1.61016
ENSOARG00020021471	44.7721	4.31366	1.10077	3.91876	8.9e-05	0.00784209	1.52196
ENSOARG00020021866	230.209	3.0398	0.779181	3.90127	9.57e-05	0.00789885	1.60702
ENSOARG00020008962	1565.87	-2.70145	0.672636	-4.01622	5.91e-05	0.00796284	0.958479
ENSOARG00020013364	76.2088	3.77437	0.966968	3.9033	9.49e-05	0.00796284	1.52196
ENSOARG00020021210	23.0931	-6.95702	1.73898	-4.00064	6.32e-05	0.00796284	1.00898
ENSOARG00020021624	22.2974	-6.90435	1.75152	-3.94192	8.08e-05	0.00796284	1.29294
ENSOARG00020000061	21.9467	8.0592	2.05228	3.92695	8.6e-05	0.00799811	1.31903
ENSOARG00020004342	777.232	-3.26	0.81446	-4.00265	6.26e-05	0.00799811	0.958479
ENSOARG00020017506	51.956	-6.30535	1.60236	-3.93503	8.32e-05	0.00799811	1.30878
ENSOARG00020020114	30.9176	4.97736	1.26779	3.92601	8.64e-05	0.00799811	1.31903
ENSOARG00020021822	706.199	-3.43717	0.864415	-3.9763	7e-05	0.0081099	1.04392
ENSOARG00020003413	105.554	-3.19111	0.836646	-3.81417	0.000136644	0.00815353	1.98802
ENSOARG00020009909	120.857	3.16556	0.829433	3.81654	0.000135338	0.00815353	1.98802
ENSOARG00020011177	31.34	-6.4185	1.63779	-3.91899	8.89e-05	0.00821805	1.26379
ENSOARG00020020350	118.312	3.04412	0.784596	3.87985	0.000104519	0.00821805	1.48023
ENSOARG00020016924	194.262	3.10631	0.803183	3.8675	0.000109955	0.00825275	1.52196
ENSOARG00020023284	16.0173	8.5571	2.18079	3.92385	8.71e-05	0.00825275	1.21006
ENSOARG00020006104	54.538	-4.94794	1.27813	-3.87123	0.000108287	0.00849854	1.44216
ENSOARG00020001496	78.8082	3.67516	0.942186	3.90067	9.59e-05	0.00884336	1.18761
ENSOARG00020011799	2454.27	-2.7894	0.704774	-3.95787	7.56e-05	0.00884336	0.958942
ENSOARG00020012425	46.7865	6.11107	1.58874	3.8465	0.000119819	0.00884336	1.47924
ENSOARG00020023300	49.0937	3.7589	0.963794	3.9001	9.62e-05	0.00884336	1.18761
ENSOARG00020012202	38.3536	-5.77219	1.4681	-3.93173	8.43e-05	0.00904576	1.00898
ENSOARG00020007119	61.8809	5.16216	1.35084	3.82143	0.000132681	0.00927168	1.52196
ENSOARG00020008115	367.062	-3.48841	0.915801	-3.80913	0.000139456	0.00927168	1.60702
ENSOARG00020017791	25.8085	7.36702	1.9091	3.85891	0.000113896	0.00927288	1.29294
ENSOARG00020024961	110.045	3.11806	0.817232	3.81539	0.000135965	0.00927288	1.533
ENSOARG00020008383	31.4064	-6.42669	1.66934	-3.84984	0.000118194	0.00969585	1.26379
ENSOARG00020008950	182.316	3.38434	0.891142	3.79775	0.000146014	0.0100575	1.48023
ENSOARG00020019109	93.3355	4.04328	1.06647	3.79126	0.000149883	0.0100575	1.52196
ENSOARG00020012985	289.565	2.69333	0.710375	3.79142	0.000149787	0.0101496	1.48023
ENSOARG00020013039	50.4161	-4.85412	1.27801	-3.79819	0.000145757	0.0101496	1.44216
ENSOARG00020008172	743.281	-3.04676	0.781944	-3.89639	9.76e-05	0.0102304	0.938671
ENSOARG00020010301	22.1807	-6.90051	1.77949	-3.8778	0.000105405	0.0102304	1.00898
ENSOARG00020018551	25.0975	8.25459	2.16267	3.81685	0.000135168	0.0102304	1.29366
ENSOARG00020004386	28.474	-6.28124	1.65129	-3.80384	0.000142473	0.0106246	1.29366
ENSOARG00020016288	31.3002	6.24387	1.64365	3.7988	0.000145401	0.0106246	1.31903
ENSOARG00020017001	180.1	-3.81595	1.01506	-3.75933	0.000170366	0.0107053	1.52196
ENSOARG00020001432	119.616	3.67748	0.980865	3.74922	0.000177387	0.0110217	1.52196
ENSOARG00020014465	43.0562	4.25438	1.13505	3.74818	0.00017812	0.0110217	1.52196
ENSOARG00020008743	2765.37	3.08308	0.799564	3.85595	0.000115281	0.0111463	0.958942
ENSOARG00020013165	73.2872	3.46962	0.925865	3.74743	0.000178655	0.0111463	1.47924
ENSOARG00020023427	73.67	3.1297	0.836892	3.73967	0.000184259	0.0111463	1.52196
ENSOARG00020024395	146.133	2.66103	0.725393	3.66839	0.000244078	0.0112198	1.98802
ENSOARG00020001330	206.725	-2.98649	0.799526	-3.73533	0.000187468	0.0114886	1.48023
ENSOARG00020018165	97.6647	5.04059	1.35697	3.71459	0.000203535	0.0118694	1.533
ENSOARG00020021633	140.79	-3.66169	0.983076	-3.72473	0.000195525	0.0118694	1.48023
ENSOARG00020014526	20.3338	-6.77493	1.80193	-3.75982	0.000170038	0.0119417	1.26379
ENSOARG00020022143	247.21	-3.31668	0.893398	-3.71243	0.000205279	0.0122289	1.47924
ENSOARG00020002620	134.125	-3.12401	0.842498	-3.70803	0.000208879	0.0122846	1.47924
ENSOARG00020018304	162.878	-4.51778	1.22147	-3.69864	0.000216761	0.0122846	1.533
ENSOARG00020000574	422.84	3.93338	1.06779	3.68367	0.000229901	0.0122911	1.60702
ENSOARG00020001156	190.649	-3.34773	0.923107	-3.62659	0.000287189	0.0122911	1.98802
ENSOARG00020003287	2460.63	-3.62143	0.948677	-3.81735	0.000134892	0.0122911	0.938671
ENSOARG00020000878	21.6656	-6.86654	1.83921	-3.73341	0.000188902	0.0123457	1.29294
ENSOARG00020007167	19.1578	5.31837	1.43007	3.71896	0.000200046	0.0128939	1.29366
ENSOARG00020009294	411.193	2.83257	0.770217	3.67762	0.000235418	0.0128939	1.52196
ENSOARG00020014377	70.7625	-3.47216	0.943208	-3.68122	0.00023212	0.0132378	1.44216
ENSOARG00020017117	223.575	5.23966	1.4337	3.65463	0.000257548	0.0132378	1.61016
ENSOARG00020003823	18.9497	-6.67239	1.79954	-3.70784	0.000209033	0.0134818	1.26295
ENSOARG00020014722	58.9907	3.56392	0.96377	3.69789	0.000217395	0.0134818	1.30878
ENSOARG00020014318	18.2622	7.79334	2.11769	3.68011	0.000233137	0.0139369	1.32291
ENSOARG00020015627	51.785	-4.59803	1.2397	-3.709	0.000208077	0.0139369	1.18761
ENSOARG00020017533	824.465	-3.03614	0.807237	-3.76115	0.000169135	0.0139369	0.960466
ENSOARG00020018402	27683.4	-2.97191	0.789284	-3.76532	0.000166334	0.0139369	0.958942
ENSOARG00020010025	102.815	-4.23935	1.16514	-3.63849	0.000274244	0.0140574	1.533
ENSOARG00020012896	359.472	-2.61258	0.725235	-3.6024	0.000315296	0.0151282	1.60702
ENSOARG00020019399	667.313	2.8815	0.799939	3.60215	0.000315594	0.0151282	1.61016
ENSOARG00020022141	2628.1	-3.29718	0.882331	-3.73689	0.000186307	0.0151282	0.958942
ENSOARG00020014091	191.568	2.67182	0.757945	3.52509	0.00042334	0.0162168	1.98802
ENSOARG00020023260	41.431	3.6924	1.02453	3.60398	0.000313382	0.0162168	1.47924
ENSOARG00020024679	49.3965	3.84951	1.06943	3.59958	0.000318726	0.016308	1.47924
ENSOARG00020001800	112.544	3.2854	0.915625	3.58815	0.000333028	0.016342	1.533
ENSOARG00020008398	234.687	-3.64496	1.01456	-3.59267	0.000327313	0.0164655	1.47924
ENSOARG00020020001	1593.36	-2.65567	0.717001	-3.70385	0.000212352	0.0164655	0.958479
ENSOARG00020001749	26.2047	6.18587	1.70952	3.61848	0.00029634	0.0166828	1.29294
ENSOARG00020012231	38.2374	-5.30012	1.46267	-3.62361	0.000290524	0.0166828	1.26379
ENSOARG00020015153	97.279	4.98206	1.39001	3.58419	0.000338132	0.0166828	1.48023
ENSOARG00020023357	18.6411	-6.64481	1.83203	-3.62702	0.000286712	0.0166828	1.26295
ENSOARG00020016769	383.044	-3.44047	0.961216	-3.57929	0.000344534	0.0167925	1.48023
ENSOARG00020003615	254.189	2.82217	0.794952	3.55011	0.000385066	0.0170542	1.61016
ENSOARG00020003757	194.63	-3.95603	1.13187	-3.49514	0.000473817	0.0170542	1.98802
ENSOARG00020019879	132.663	-3.5986	1.00859	-3.56797	0.000359763	0.0172324	1.48023
ENSOARG00020005786	29.4676	-6.32846	1.76024	-3.59523	0.000324108	0.0173224	1.31903
ENSOARG00020004073	109.08	3.70251	1.04249	3.5516	0.00038289	0.0174875	1.533
ENSOARG00020011827	108.033	3.03651	0.852999	3.5598	0.000371132	0.0174875	1.47924
ENSOARG00020026027	45.5552	3.47839	0.975862	3.56443	0.000364651	0.0175248	1.44216
ENSOARG00020010490	84.8138	3.07181	0.862909	3.55982	0.000371103	0.0177352	1.44216
ENSOARG00020025228	151.824	-3.30765	0.932756	-3.54611	0.000390967	0.0181029	1.48023
ENSOARG00020001166	37.7588	-5.77158	1.6153	-3.57307	0.000352818	0.0181315	1.31903
ENSOARG00020025779	32.9741	-5.48451	1.5348	-3.57343	0.00035234	0.0181315	1.31903
ENSOARG00020002205	37.6569	3.5338	0.991591	3.56376	0.000365574	0.0190613	1.29294
ENSOARG00020005272	68.7398	3.88132	1.08504	3.57713	0.000347393	0.0196128	1.18761
ENSOARG00020020933	17.3457	-6.54485	1.84106	-3.55494	0.000378065	0.0199626	1.26295
ENSOARG00020022450	48.3816	-3.99792	1.12814	-3.54381	0.000394397	0.0199877	1.30878
ENSOARG00020006500	25.8769	-7.12286	1.97843	-3.60025	0.00031791	0.0206762	1.00898
ENSOARG00020017787	152.276	-3.35655	0.95913	-3.49958	0.000465997	0.0206762	1.47924
ENSOARG00020023992	315.344	-3.0889	0.883212	-3.49735	0.000469897	0.0207354	1.47924
ENSOARG00020017205	230.189	-3.59743	1.03566	-3.47356	0.000513607	0.0207523	1.60702
ENSOARG00020011191	21.5843	8.4351	2.34746	3.59328	0.000326536	0.0207948	1.00898
ENSOARG00020022831	119.763	2.68449	0.786496	3.41322	0.000641999	0.0207948	1.98802
ENSOARG00020021158	22.5753	-5.94215	1.69373	-3.50833	0.000450927	0.0222935	1.29294
ENSOARG00020020122	14.4525	7.46419	2.12192	3.51766	0.000435377	0.0228806	1.21006
ENSOARG00020007104	32.6992	5.39698	1.54185	3.50033	0.000464682	0.0231343	1.26379
ENSOARG00020015074	61.307	3.29784	0.937608	3.51729	0.000435974	0.0231343	1.18761
ENSOARG00020023344	28.7307	5.77008	1.64903	3.49908	0.00046686	0.0231343	1.26379
ENSOARG00020003775	124.97	-3.12655	0.9074	-3.44562	0.000569755	0.0231575	1.533
ENSOARG00020002622	409.356	2.66507	0.771877	3.45271	0.000554988	0.023244	1.48023
ENSOARG00020009009	1356.03	-3.03048	0.850047	-3.56508	0.00036375	0.0234099	0.958479
ENSOARG00020024296	416.946	-2.87552	0.840099	-3.42283	0.000619724	0.0236234	1.61016
ENSOARG00020002208	304.307	-2.748	0.79906	-3.43904	0.000583787	0.0241032	1.47924
ENSOARG00020015290	24.6156	6.25039	1.80389	3.46495	0.000530337	0.0243696	1.31903
ENSOARG00020019003	4957.69	-2.46707	0.694102	-3.55434	0.000378934	0.0243696	0.938671
ENSOARG00020024567	35.5645	5.29718	1.52727	3.4684	0.000523568	0.0243696	1.29294
ENSOARG00020005472	178.548	-3.86976	1.12902	-3.42754	0.000609075	0.0245234	1.48023
ENSOARG00020010772	16.4595	-6.46959	1.86547	-3.46808	0.000524193	0.0245234	1.27894
ENSOARG00020017936	230.355	2.77791	0.816356	3.40282	0.000666946	0.0245679	1.61016
ENSOARG00020023068	101.89	2.90753	0.849058	3.42442	0.00061611	0.0245692	1.48023
ENSOARG00020018225	2068.13	-2.56868	0.725807	-3.53907	0.000401541	0.0245996	0.958942
ENSOARG00020001322	134.638	-2.77461	0.831163	-3.33823	0.000843134	0.0247973	1.98802
ENSOARG00020015385	31.1221	4.78871	1.36176	3.51655	0.000437193	0.0252152	1.00898
ENSOARG00020009771	17.8962	-6.59175	1.91096	-3.44945	0.00056173	0.0253205	1.27894
ENSOARG00020011589	623.208	-2.48197	0.727593	-3.4112	0.000646774	0.0253205	1.47924
ENSOARG00020024612	254.493	-2.96324	0.876631	-3.38026	0.000724168	0.0258073	1.61016
ENSOARG00020006185	312.925	2.77275	0.815683	3.3993	0.000675589	0.0259419	1.47924
ENSOARG00020013188	38.9873	-4.24577	1.23605	-3.43494	0.000592692	0.0259419	1.29294
ENSOARG00020016067	64.2317	3.24565	0.952987	3.40576	0.000659798	0.0259419	1.44216
ENSOARG00020014149	40.9796	4.21353	1.2079	3.48833	0.000486052	0.0271371	1.00898
ENSOARG00020019659	29.5366	-5.38402	1.57458	-3.41934	0.000627737	0.0272261	1.29294
ENSOARG00020004679	39.5187	-4.85856	1.39714	-3.47751	0.000506103	0.0278748	1.00898
ENSOARG00020009970	109.341	-3.85634	1.17155	-3.29165	0.000996015	0.0278748	1.98802
ENSOARG00020023446	108.616	-4.10644	1.22091	-3.36343	0.000769798	0.027982	1.52196
ENSOARG00020007259	359.006	2.433	0.721991	3.36984	0.000752105	0.027984	1.48023
ENSOARG00020000934	155.28	-3.17234	0.968062	-3.277	0.00104916	0.0288352	1.98802
ENSOARG00020011576	148.071	-2.83226	0.864678	-3.27551	0.00105472	0.0288352	1.98802
ENSOARG00020023612	38.5304	3.98345	1.17334	3.39497	0.000686373	0.0288352	1.29366
ENSOARG00020018942	1232.83	-2.74357	0.789541	-3.47489	0.000511057	0.028851	0.958479
ENSOARG00020003518	73.2781	-3.33743	0.997813	-3.34474	0.000823594	0.0289007	1.52196
ENSOARG00020008949	48.6652	3.50206	1.04683	3.34539	0.000821667	0.0289007	1.52196
ENSOARG00020015823	131.061	-3.06115	0.913008	-3.35282	0.000799929	0.0289007	1.47924
ENSOARG00020003011	73.4972	-3.05729	0.904699	-3.37935	0.000726581	0.0291351	1.30878
ENSOARG00020006271	1720.96	-2.8184	0.812302	-3.46964	0.00052116	0.0291351	0.938671
ENSOARG00020006582	20.3363	7.3138	2.16291	3.38146	0.000721008	0.0291351	1.29366
ENSOARG00020023915	43.6679	3.13199	0.919225	3.40721	0.000656304	0.0291351	1.18761
ENSOARG00020024712	22.4036	-5.92763	1.75533	-3.37693	0.000732992	0.0291351	1.31903
ENSOARG00020025010	32.2785	-6.46422	1.87549	-3.44668	0.000567513	0.0292788	1.00898
ENSOARG00020011478	20.7656	4.64469	1.37529	3.37725	0.000732138	0.0293082	1.29366
ENSOARG00020021132	68.171	-3.66733	1.10084	-3.33139	0.000864132	0.0293082	1.52196
ENSOARG00020010870	90.5307	2.75093	0.824643	3.3359	0.000850223	0.0295003	1.48023
ENSOARG00020017617	189.259	-3.33143	1.0244	-3.25208	0.00114565	0.0295003	1.98802
ENSOARG00020017063	350.828	2.80408	0.847421	3.30896	0.000936439	0.0296139	1.60702
ENSOARG00020018814	15.3789	-6.37079	1.88783	-3.37467	0.000739054	0.0296139	1.26295
ENSOARG00020024333	71.6382	2.93001	0.88181	3.32273	0.000891414	0.0296139	1.52196
ENSOARG00020006395	18.9229	-6.67236	1.98347	-3.36399	0.000768249	0.0301205	1.27894
ENSOARG00020015618	71.4379	3.27683	0.984148	3.32961	0.000869687	0.0301205	1.44216
ENSOARG00020024379	68.5924	-3.78192	1.12598	-3.35877	0.000782904	0.0301205	1.30878
ENSOARG00020005869	21.4759	4.41	1.31599	3.35109	0.000804951	0.030358	1.31903
ENSOARG00020021436	4233.55	-2.93467	0.852371	-3.44295	0.000575412	0.0303722	0.938671
ENSOARG00020003931	154.479	3.64369	1.10436	3.29938	0.000968982	0.0305804	1.533
ENSOARG00020009528	152.367	2.85279	0.860972	3.31345	0.00092151	0.0305804	1.47924
ENSOARG00020010595	23.2533	7.42547	2.17123	3.41993	0.000626374	0.0305804	1.00898
ENSOARG00020018621	15.3384	-6.36386	1.90428	-3.34187	0.000832158	0.0305804	1.32291
ENSOARG00020024791	146.432	2.7086	0.82003	3.30305	0.000956378	0.0305804	1.52196
ENSOARG00020026191	820.46	-2.75579	0.80377	-3.42858	0.00060674	0.0305804	0.960466
ENSOARG00020014026	86.529	-3.01332	0.911761	-3.30495	0.000949937	0.0308345	1.47924
ENSOARG00020016042	144.019	2.41832	0.731743	3.30488	0.000950164	0.0308345	1.47924
ENSOARG00020021389	72.502	2.7915	0.830007	3.36323	0.000770363	0.0308981	1.18761
ENSOARG00020021809	233.463	2.45387	0.748437	3.27867	0.00104299	0.0308981	1.61016
ENSOARG00020005655	4313.68	-2.50882	0.74047	-3.38814	0.00070368	0.0311463	1.04392
ENSOARG00020006843	2375.89	-2.87523	0.84226	-3.41371	0.000640851	0.0311463	0.958479
ENSOARG00020012459	1086.53	-2.86167	0.838214	-3.41401	0.000640149	0.0311463	0.958479
ENSOARG00020016437	15.9513	8.54344	2.56128	3.33562	0.000851101	0.0311463	1.26295
ENSOARG00020020483	70.0424	4.52373	1.36974	3.30261	0.000957882	0.0311463	1.44216
ENSOARG00020023089	1033.64	-2.56505	0.750546	-3.41757	0.000631823	0.0311463	0.938671
ENSOARG00020024561	19.6082	-5.7367	1.72315	-3.32919	0.000870978	0.0311463	1.29294
ENSOARG00020026469	106.587	3.40533	1.0357	3.28795	0.00100921	0.0311463	1.52196
ENSOARG00020000820	98.2077	3.02026	0.918869	3.28693	0.00101286	0.0312039	1.47924
ENSOARG00020001360	945.468	-2.86016	0.844878	-3.38529	0.000711031	0.0312039	1.04392
ENSOARG00020001972	287.826	-2.91814	0.894655	-3.26175	0.00110727	0.0312039	1.60702
ENSOARG00020002944	101.073	-2.7549	0.841283	-3.27464	0.00105798	0.0312039	1.52196
ENSOARG00020004293	262.783	2.55888	0.779868	3.28117	0.00103378	0.0312039	1.48023
ENSOARG00020009237	101.965	2.9078	0.908694	3.19998	0.00137438	0.0312039	1.98802
ENSOARG00020010128	1955.9	-2.38539	0.700001	-3.4077	0.00065513	0.0312039	0.938671
ENSOARG00020013638	152.415	2.8509	0.889452	3.20523	0.00134955	0.0312039	1.98802
ENSOARG00020015358	90.4224	3.65826	1.11549	3.2795	0.0010399	0.0312039	1.48023
ENSOARG00020018631	448.208	2.98336	0.912203	3.2705	0.00107357	0.0312039	1.52196
ENSOARG00020022730	61.403	-3.37932	1.02853	-3.28559	0.0010177	0.0312039	1.44216
ENSOARG00020022994	440.761	-3.57632	1.08935	-3.283	0.00102709	0.0312039	1.47924
ENSOARG00020016886	167.318	-3.22053	0.982849	-3.27673	0.00105015	0.03128	1.47924
ENSOARG00020012053	43.1606	4.2644	1.30505	3.26762	0.00108456	0.0312827	1.52196
ENSOARG00020021473	54.3138	-3.51221	1.07071	-3.28026	0.0010371	0.0312827	1.44216
ENSOARG00020022065	9100.84	-2.28742	0.678411	-3.37174	0.000746958	0.0312827	1.04392
ENSOARG00020022142	201.156	2.72383	0.834341	3.26464	0.00109602	0.0312827	1.52196
ENSOARG00020007785	27.8741	4.30738	1.30305	3.30561	0.000947702	0.0317114	1.29366
ENSOARG00020015962	24788.9	-2.89594	0.860869	-3.36397	0.000768291	0.031747	1.04392
ENSOARG00020005298	236.49	2.91314	0.900954	3.2334	0.00122327	0.0326574	1.61016
ENSOARG00020006331	79.03	3.1772	0.957634	3.31776	0.000907421	0.0327305	1.18761
ENSOARG00020023426	15.1537	8.46931	2.58297	3.27891	0.00104209	0.0336268	1.32291
ENSOARG00020018035	300.414	2.61229	0.810947	3.22128	0.00127621	0.033679	1.61016
ENSOARG00020024657	22.5418	-5.94374	1.80693	-3.28941	0.00100396	0.033679	1.26379
ENSOARG00020004238	142.316	-3.19936	0.989116	-3.23456	0.00121828	0.0337044	1.52196
ENSOARG00020013385	234.577	-2.82601	0.877932	-3.21894	0.00128664	0.0337044	1.61016
ENSOARG00020022843	385.009	2.35722	0.727408	3.24057	0.00119291	0.0338402	1.47924
ENSOARG00020010382	55.6487	3.28115	1.01563	3.23065	0.00123507	0.0338515	1.52196
ENSOARG00020023544	104.692	3.44542	1.06724	3.22834	0.00124509	0.0338515	1.533
ENSOARG00020008632	323.12	-2.98836	0.92689	-3.22408	0.00126379	0.0340342	1.52196
ENSOARG00020012137	48.4301	4.38471	1.35613	3.23325	0.00122391	0.0340342	1.47924
ENSOARG00020017245	555.533	-2.84681	0.880649	-3.23263	0.00122657	0.0340342	1.47924
ENSOARG00020019074	111.785	-3.33371	1.05874	-3.14874	0.00163974	0.0340342	1.98802
ENSOARG00020024489	55.5192	2.94401	0.893068	3.29651	0.000978941	0.0340342	1.18761
ENSOARG00020021735	95.9996	2.97461	0.946574	3.1425	0.00167511	0.0344211	1.98802
ENSOARG00020014614	39.9182	-4.11074	1.23271	-3.33471	0.000853875	0.034457	1.00898
ENSOARG00020011023	441.678	2.7644	0.863819	3.20021	0.00137329	0.0346636	1.60702
ENSOARG00020025234	24433.8	-3.07291	0.916939	-3.35127	0.000804409	0.0346636	0.938671
ENSOARG00020005819	17.9243	-6.59281	2.02139	-3.26151	0.00110819	0.0348203	1.27894
ENSOARG00020019607	153.519	2.59268	0.807734	3.20982	0.0013282	0.0348203	1.533
ENSOARG00020017341	28.2542	-5.31711	1.59908	-3.32511	0.000883827	0.0350866	1.00898
ENSOARG00020019407	171.601	2.43273	0.778438	3.12514	0.00177719	0.0356916	1.98802
ENSOARG00020023590	50.3088	3.37866	1.0553	3.20162	0.00136657	0.0357337	1.52196
ENSOARG00020004259	128.1	3.47372	1.11308	3.12083	0.00180344	0.0359858	1.98802
ENSOARG00020022299	45.0815	-3.86536	1.20409	-3.2102	0.00132645	0.0362527	1.44216
ENSOARG00020022857	265.229	2.44217	0.768362	3.17841	0.00148087	0.0362527	1.61016
ENSOARG00020013915	74.6972	2.72151	0.85025	3.20084	0.0013703	0.0362806	1.47924
ENSOARG00020024932	135.15	3.22856	1.03628	3.11552	0.00183622	0.0362806	1.98802
ENSOARG00020000695	17.5965	7.7427	2.39922	3.22717	0.00125019	0.036895	1.32291
ENSOARG00020025061	125.378	-4.00319	1.2541	-3.19209	0.00141247	0.0371613	1.47924
ENSOARG00020019033	406.737	-2.77554	0.870329	-3.18907	0.00142733	0.0374343	1.47924
ENSOARG00020001107	160.941	2.58413	0.811196	3.18558	0.00144465	0.0375726	1.48023
ENSOARG00020014240	44.5331	-4.23686	1.33013	-3.18528	0.00144612	0.0375726	1.47924
ENSOARG00020015344	34.7986	3.97769	1.23376	3.22405	0.00126393	0.0375726	1.29294
ENSOARG00020003490	631.978	-3.29396	1.03459	-3.18384	0.00145337	0.0376183	1.48023
ENSOARG00020005677	113.174	-2.61698	0.822955	-3.17997	0.00147288	0.0380053	1.48023
ENSOARG00020020034	155.065	-2.96211	0.958823	-3.08932	0.00200612	0.0384239	1.98802
ENSOARG00020000536	266.299	-3.15322	0.993861	-3.1727	0.0015103	0.0386654	1.48023
ENSOARG00020001248	1026.51	-2.52966	0.767999	-3.29384	0.000988293	0.0386654	0.958942
ENSOARG00020002367	377.166	-2.93488	0.926708	-3.167	0.00154021	0.0386654	1.48023
ENSOARG00020003246	259.459	-2.55295	0.811266	-3.14687	0.00165029	0.0386654	1.60702
ENSOARG00020008550	36.2367	-4.68459	1.45759	-3.21394	0.00130928	0.0386654	1.26379
ENSOARG00020018425	250.471	-2.80274	0.884391	-3.16912	0.00152899	0.0386654	1.48023
ENSOARG00020024838	11.676	7.15051	2.21702	3.22528	0.00125851	0.0386654	1.21006
ENSOARG00020025327	34.4711	-4.06795	1.26996	-3.20322	0.00135901	0.0386654	1.31903
ENSOARG00020010657	38.9895	3.43883	1.07515	3.19846	0.00138166	0.0388071	1.31903
ENSOARG00020026148	602.946	2.36068	0.747533	3.15796	0.00158877	0.0396722	1.47924
ENSOARG00020010057	69.5858	-3.11069	0.974753	-3.19126	0.00141652	0.0398585	1.30878
ENSOARG00020000138	14.2044	-6.25769	1.95089	-3.20761	0.00133843	0.0400816	1.21006
ENSOARG00020004094	205.304	2.35427	0.75034	3.1376	0.00170334	0.0400816	1.533
ENSOARG00020005254	613.548	-2.69271	0.855093	-3.14903	0.00163813	0.0400816	1.48023
ENSOARG00020009324	73.8395	-3.42316	1.08461	-3.15612	0.00159884	0.0400816	1.44216
ENSOARG00020013911	903.867	-2.2323	0.680129	-3.28217	0.0010301	0.0400816	0.938671
ENSOARG00020022517	943.049	-3.59726	1.09691	-3.27944	0.00104012	0.0400816	0.938671
ENSOARG00020024631	163.536	-2.99896	0.951711	-3.15112	0.00162645	0.0400816	1.47924
ENSOARG00020012878	74.6701	2.78011	0.884818	3.14202	0.00167788	0.0405144	1.47924
ENSOARG00020017230	425.839	-2.56575	0.822945	-3.11777	0.00182226	0.0405144	1.60702
ENSOARG00020017332	151.365	4.06363	1.29347	3.14166	0.00167993	0.0405144	1.47924
ENSOARG00020019275	104.056	3.37035	1.07573	3.13308	0.00172982	0.0405144	1.52196
ENSOARG00020024877	23.0048	-5.07853	1.6	-3.17409	0.00150309	0.0405144	1.31903
ENSOARG00020025091	40.1742	4.00769	1.26313	3.17283	0.00150959	0.0405729	1.31903
ENSOARG00020009676	1391.59	-2.9104	0.891949	-3.26297	0.00110251	0.040642	0.958942
ENSOARG00020020822	13.0622	-6.13398	1.93589	-3.16856	0.00153194	0.0408179	1.32291
ENSOARG00020004374	270.894	-2.53492	0.815461	-3.10857	0.00187993	0.0409393	1.60702
ENSOARG00020009369	14.3091	7.86263	2.46358	3.19155	0.00141514	0.0409393	1.21006
ENSOARG00020021493	18.2123	-6.61538	2.08116	-3.17869	0.00147942	0.0409393	1.26295
ENSOARG00020002412	904.442	-2.25388	0.692149	-3.25636	0.00112852	0.0410328	0.958479
ENSOARG00020003723	96.1998	2.9029	0.930868	3.11849	0.00181783	0.0411601	1.52196
ENSOARG00020010165	15.8492	-6.41643	2.0208	-3.17519	0.00149737	0.0411601	1.26295
ENSOARG00020013482	18.4679	7.09364	2.22632	3.18626	0.00144125	0.0411601	1.21006
ENSOARG00020019276	47.0686	4.21321	1.34396	3.13492	0.00171898	0.0411601	1.44216
ENSOARG00020011260	2658.37	-3.26744	1.00521	-3.25052	0.00115194	0.0413011	0.958479
ENSOARG00020021632	1165.5	2.87769	0.883979	3.25538	0.0011324	0.0413424	0.938671
ENSOARG00020004142	76.2162	3.07928	0.989022	3.11346	0.00184908	0.0415198	1.52196
ENSOARG00020004835	36.9003	5.15826	1.63445	3.15595	0.00159974	0.0419362	1.29294
ENSOARG00020011216	132.465	3.0886	0.993735	3.10807	0.00188315	0.0419362	1.52196
ENSOARG00020017963	570.42	2.3048	0.745238	3.0927	0.00198341	0.0419362	1.60702
ENSOARG00020001134	32.7162	3.2447	1.03123	3.14645	0.00165266	0.042004	1.31903
ENSOARG00020008268	82.204	2.59763	0.81761	3.1771	0.00148755	0.042004	1.18761
ENSOARG00020019713	3100.74	-3.3181	1.02431	-3.23936	0.00119798	0.042004	0.960466
ENSOARG00020024392	114.339	2.52912	0.812386	3.1132	0.00185068	0.042004	1.47924
ENSOARG00020003454	347.478	3.10724	0.998951	3.1105	0.0018677	0.0422136	1.47924
ENSOARG00020022399	541.267	-2.37834	0.767289	-3.09967	0.0019374	0.0423573	1.52196
ENSOARG00020024433	14.8062	-6.31335	2.01064	-3.13997	0.00168964	0.0423573	1.32291
ENSOARG00020024787	221.584	2.75004	0.885071	3.10714	0.00188905	0.0423573	1.48023
ENSOARG00020011832	290.243	2.22209	0.715584	3.10529	0.00190096	0.0423908	1.47924
ENSOARG00020025889	961.885	-2.43993	0.760803	-3.20705	0.00134104	0.0423908	1.04392
ENSOARG00020005945	148.793	-2.8994	0.962462	-3.01249	0.00259117	0.0425003	1.98802
ENSOARG00020012848	792.499	-2.41096	0.745183	-3.2354	0.00121473	0.0425003	0.938671
ENSOARG00020013021	558.814	-2.86099	0.929656	-3.07747	0.00208766	0.0425003	1.60702
ENSOARG00020019735	92.8338	-2.72115	0.877622	-3.10059	0.00193135	0.0425003	1.47924
ENSOARG00020022415	439.239	2.59712	0.839513	3.09361	0.0019774	0.0425003	1.52196
ENSOARG00020016337	80.4557	-3.07798	0.990895	-3.10626	0.00189469	0.0426531	1.44216
ENSOARG00020002417	209.016	-2.7117	0.880398	-3.08008	0.00206942	0.0437112	1.533
ENSOARG00020005105	31.5781	5.33066	1.66597	3.19973	0.00137558	0.0439534	1.00898
ENSOARG00020008993	2729.28	-2.4606	0.771719	-3.18846	0.00143032	0.0439534	1.04392
ENSOARG00020015588	292.346	2.39316	0.777637	3.07748	0.00208759	0.0439534	1.52196
ENSOARG00020022391	20.6467	-6.79702	2.17362	-3.12705	0.00176568	0.0439534	1.29294
ENSOARG00020009393	16.0014	7.60514	2.43079	3.12867	0.00175598	0.0443232	1.26295
ENSOARG00020012764	1548.7	-2.73519	0.852345	-3.20902	0.00133187	0.0443232	0.958479
ENSOARG00020026266	86.747	-3.90142	1.26986	-3.07231	0.00212408	0.0443756	1.52196
ENSOARG00020000996	5430.59	-2.54365	0.792026	-3.21158	0.00132009	0.0446017	0.938671
ENSOARG00020006703	10.7767	7.03566	2.25338	3.12227	0.00179465	0.0448854	1.26295
ENSOARG00020008069	94.954	-3.97291	1.29209	-3.07478	0.00210656	0.0448854	1.48023
ENSOARG00020024808	891.995	-2.81495	0.877602	-3.20754	0.00133874	0.0448854	0.938671
ENSOARG00020017979	222.861	-2.91207	0.947722	-3.0727	0.00212131	0.0450176	1.47924
ENSOARG00020006266	14.3792	5.74596	1.84719	3.11065	0.00186679	0.04507	1.29366
ENSOARG00020023912	155.122	-2.90887	0.947129	-3.07125	0.00213167	0.04507	1.47924
ENSOARG00020014299	456.206	2.3047	0.757128	3.04401	0.00233451	0.0452574	1.60702
ENSOARG00020013112	14.615	-6.29999	2.02911	-3.1048	0.00190408	0.0456238	1.29366
ENSOARG00020025035	103.822	2.59052	0.845079	3.06542	0.00217366	0.0456238	1.48023
ENSOARG00020007270	14.3356	6.50627	2.0926	3.10918	0.00187606	0.04593	1.26295
ENSOARG00020001459	105.452	-3.08846	1.00971	-3.05875	0.00222262	0.0461882	1.48023
ENSOARG00020011596	124.853	-2.92939	0.96078	-3.04897	0.0022963	0.0461882	1.52196
ENSOARG00020015236	550.667	-2.6001	0.850298	-3.05787	0.00222915	0.0461882	1.47924
ENSOARG00020016143	62.5276	4.31663	1.41132	3.05858	0.00222387	0.0461882	1.47924
ENSOARG00020012497	29.818	3.42768	1.0817	3.16878	0.00153079	0.0463297	1.00898
ENSOARG00020002022	61.0408	-3.7943	1.22853	-3.08848	0.00201181	0.0465946	1.30878
ENSOARG00020003778	14.437	6.3533	2.04125	3.11245	0.0018554	0.0465946	1.21006
ENSOARG00020022058	1234.9	-2.63708	0.829453	-3.1793	0.00147632	0.0465946	0.960466
ENSOARG00020016509	120.798	2.60182	0.855901	3.03986	0.00236686	0.047024	1.52196
ENSOARG00020004329	36.7023	3.30148	1.07057	3.08386	0.00204332	0.0471397	1.29294
ENSOARG00020013977	43.019	-3.44662	1.11885	-3.08051	0.00206648	0.0471397	1.30878
ENSOARG00020016925	24.3267	-5.09323	1.64675	-3.09289	0.00198216	0.0471397	1.26379
ENSOARG00020017467	89.6842	2.7933	0.917683	3.04386	0.00233562	0.0471397	1.47924
ENSOARG00020020255	15.8411	-6.40837	2.0714	-3.09374	0.00197649	0.0471397	1.26295
ENSOARG00020022661	623.286	-2.75251	0.90445	-3.0433	0.00234	0.0471397	1.47924
ENSOARG00020016825	18.2709	-5.62823	1.82493	-3.08409	0.00204179	0.0473453	1.27894
ENSOARG00020024614	6610.32	-2.3826	0.751893	-3.1688	0.00153071	0.0473453	0.958942
ENSOARG00020000679	154.012	2.44874	0.809468	3.02512	0.00248531	0.0474597	1.533
ENSOARG00020002182	22.3136	4.23736	1.37628	3.07886	0.00207798	0.0474597	1.29294
ENSOARG00020002652	721.926	-2.44636	0.772354	-3.16741	0.00153805	0.0474597	0.938671
ENSOARG00020004146	29.6055	4.33906	1.41383	3.06901	0.00214769	0.0474597	1.31903
ENSOARG00020005460	59.611	-3.10825	1.0033	-3.09803	0.00194813	0.0474597	1.18761
ENSOARG00020012168	27.5382	4.99701	1.62198	3.0808	0.00206444	0.0474597	1.26379
ENSOARG00020013876	16.9403	-6.51268	2.1207	-3.071	0.0021334	0.0474597	1.29366
ENSOARG00020016343	17.288	-5.55204	1.79213	-3.09802	0.00194821	0.0474597	1.21006
ENSOARG00020016785	18.2843	-5.6349	1.82975	-3.0796	0.00207279	0.0474597	1.27894
ENSOARG00020017850	80.5351	3.34472	1.08021	3.09636	0.00195909	0.0474597	1.18761
ENSOARG00020019801	12.8986	-6.1165	1.98412	-3.08273	0.00205109	0.0474597	1.26295
ENSOARG00020020539	42.7138	3.53982	1.17138	3.02192	0.00251175	0.0474597	1.52196
ENSOARG00020025152	12.7922	5.67359	1.83915	3.0849	0.00203621	0.0474597	1.26295
ENSOARG00020020684	27.7215	-4.35013	1.42109	-3.06112	0.00220509	0.0479638	1.31903
ENSOARG00020000869	1402.37	-2.41862	0.765175	-3.16087	0.00157297	0.0479666	0.938671
ENSOARG00020013640	16.4013	-5.47328	1.78394	-3.06808	0.00215437	0.0481056	1.27894
ENSOARG00020016155	446.228	2.21579	0.73356	3.02059	0.0025228	0.0485921	1.47924
ENSOARG00020024850	1938.38	-2.55974	0.811889	-3.15282	0.00161699	0.0489683	0.938671
ENSOARG00020009353	1561.37	2.3339	0.74247	3.14343	0.00166983	0.0492489	0.960466
ENSOARG00020017016	13.2714	5.90424	1.92819	3.06206	0.00219817	0.0492489	1.26295
ENSOARG00020026018	24.707	-4.49539	1.47226	-3.0534	0.00226263	0.0494041	1.29294
ENSOARG00020008341	681.126	-2.81129	0.902467	-3.11512	0.00183869	0.0494981	1.04392
ENSOARG00020024924	42.2064	-3.80552	1.24854	-3.04797	0.00230389	0.0494981	1.30878
ENSOARG00020006723	16.7504	5.14521	1.676	3.06994	0.00214102	0.0496102	1.21006
ENSOARG00020020863	25.1687	-4.63969	1.5181	-3.05626	0.0022412	0.0496109	1.26379
ENSOARG00020025226	10.3936	6.92479	2.27679	3.04147	0.0023543	0.0496726	1.32291
ENSOARG00020003481	1153.39	-2.0952	0.669659	-3.12876	0.00175548	0.0508871	0.960466
ENSOARG00020015663	28.5072	4.49637	1.47986	3.03838	0.00237855	0.0508871	1.29294
ENSOARG00020015790	16.0028	-5.43653	1.7889	-3.03904	0.00237334	0.0508871	1.29366
ENSOARG00020019112	32.1774	-4.30244	1.41586	-3.03874	0.00237569	0.0508871	1.29294
ENSOARG00020008102	327.32	-2.46178	0.821475	-2.99678	0.00272846	0.0509073	1.47924
ENSOARG00020011961	79.2692	-2.92332	0.978606	-2.98723	0.00281522	0.0509378	1.52196
ENSOARG00020017211	306.231	-2.77202	0.925796	-2.9942	0.00275161	0.0510764	1.48023
ENSOARG00020002514	29.9265	3.26647	1.07435	3.04041	0.00236258	0.0511682	1.26379
ENSOARG00020014730	159.731	2.4315	0.812585	2.9923	0.00276883	0.0511682	1.48023
ENSOARG00020006305	161.821	-2.5483	0.855832	-2.97757	0.00290545	0.0516631	1.533
ENSOARG00020017682	11.8799	-5.99782	1.97791	-3.0324	0.00242616	0.0516631	1.27894
ENSOARG00020019524	37.3423	-3.59071	1.18311	-3.03499	0.00240546	0.0517224	1.26379
ENSOARG00020002403	52.6267	-3.13413	1.02784	-3.04923	0.00229425	0.0522652	1.18761
ENSOARG00020007557	20.2715	5.28112	1.75007	3.01766	0.00254732	0.0522652	1.31903
ENSOARG00020000741	1204.76	-2.45415	0.788826	-3.11114	0.00186364	0.0524896	0.958479
ENSOARG00020019356	2307.89	-2.66034	0.854565	-3.11309	0.00185141	0.0531292	0.938671
ENSOARG00020001597	40.2365	3.24768	1.05111	3.08977	0.0020031	0.0532438	1.00898
ENSOARG00020021076	497.419	-2.28728	0.775758	-2.94844	0.0031938	0.0532438	1.61016
ENSOARG00020022689	114.229	-2.9027	0.976326	-2.97308	0.00294824	0.0533375	1.47924
ENSOARG00020011520	1272.7	2.78652	0.89818	3.10241	0.00191951	0.0533674	0.960466
ENSOARG00020015635	16.9599	5.36144	1.78084	3.01062	0.00260719	0.0537007	1.29366
ENSOARG00020004282	412.662	-2.78151	0.94525	-2.94262	0.00325452	0.0537415	1.61016
ENSOARG00020017590	56.2605	3.05926	1.03081	2.96781	0.00299932	0.0537948	1.47924
ENSOARG00020020694	102.582	-3.00146	1.01592	-2.95443	0.00313246	0.0540964	1.533
ENSOARG00020001721	13.4169	-6.1756	2.05337	-3.00754	0.00263371	0.0544014	1.27894
ENSOARG00020020238	3345.13	2.73053	0.883315	3.09123	0.0019933	0.0547085	0.960466
ENSOARG00020005243	146.753	-2.3338	0.792003	-2.9467	0.00321181	0.054901	1.533
ENSOARG00020011918	63.9494	3.3851	1.11917	3.02465	0.00248923	0.054901	1.18761
ENSOARG00020024713	27.6333	4.60801	1.53648	2.99906	0.0027081	0.054901	1.29366
ENSOARG00020013779	10840.9	-2.10967	0.684002	-3.0843	0.00204032	0.0554071	0.960466
ENSOARG00020024426	2416.69	-2.7624	0.895532	-3.08465	0.00203793	0.0554071	0.960466
ENSOARG00020000169	31.4298	-3.82288	1.2801	-2.9864	0.00282285	0.0557013	1.31903
ENSOARG00020023128	81.7587	3.37203	1.11744	3.01764	0.00254749	0.0557128	1.18761
ENSOARG00020014172	10.9737	6.27229	2.09722	2.99077	0.00278275	0.0557514	1.29366
ENSOARG00020021366	363.884	-2.0209	0.687447	-2.93972	0.00328507	0.0558255	1.52196
ENSOARG00020009005	104.681	2.27857	0.798702	2.85284	0.00433303	0.0562541	1.98802
ENSOARG00020005229	11.5647	8.07867	2.71417	2.97648	0.00291574	0.056531	1.32291
ENSOARG00020014473	51.7957	3.16428	1.07267	2.94992	0.0031786	0.056531	1.44216
ENSOARG00020014621	13.5447	-6.1905	2.07452	-2.98406	0.00284455	0.056531	1.29366
ENSOARG00020019973	76.272	2.98053	1.00109	2.9773	0.00290796	0.0568703	1.30878
ENSOARG00020000973	143.066	-2.84854	1.00174	-2.8436	0.00446065	0.0569576	1.98802
ENSOARG00020012201	15.7503	5.37238	1.79127	2.99921	0.00270684	0.0569576	1.21006
ENSOARG00020014734	60.4306	-3.5334	1.17576	-3.00521	0.00265398	0.0569576	1.18761
ENSOARG00020018876	116.408	3.18818	1.08876	2.92826	0.00340861	0.0569576	1.52196
ENSOARG00020018255	580.14	-2.2076	0.752135	-2.93511	0.00333429	0.0571013	1.47924
ENSOARG00020000845	81.2744	3.30089	1.12522	2.93354	0.00335119	0.058032	1.44216
ENSOARG00020000997	851.232	-2.07634	0.677248	-3.06585	0.00217055	0.058032	0.938671
ENSOARG00020004299	11.2884	8.05263	2.71177	2.96951	0.00298275	0.058032	1.29366
ENSOARG00020007931	520.434	-3.36991	1.16126	-2.90194	0.0037086	0.058032	1.61016
ENSOARG00020010345	98.6756	2.54119	0.897168	2.83246	0.00461914	0.058032	1.98802
ENSOARG00020017434	20.1304	-5.77554	1.8977	-3.04345	0.00233883	0.058032	1.00898
ENSOARG00020025122	11.1432	7.09034	2.37139	2.98995	0.00279019	0.058032	1.21006
ENSOARG00020001209	1982.7	2.51482	0.822915	3.05599	0.00224318	0.0582084	0.960466
ENSOARG00020008976	90.8759	-3.2957	1.16499	-2.82896	0.00466994	0.0584278	1.98802
ENSOARG00020012241	109.292	2.31844	0.794392	2.91851	0.00351709	0.0590199	1.47924
ENSOARG00020023984	1341.27	-2.25524	0.74575	-3.02413	0.00249351	0.0591733	1.04392
ENSOARG00020002978	16.7879	-5.5102	1.86762	-2.95039	0.00317372	0.0591938	1.32291
ENSOARG00020018538	14.383	6.74288	2.28528	2.95057	0.0031719	0.0591938	1.32291
ENSOARG00020011553	44.8374	2.81684	0.966395	2.91479	0.00355923	0.0592501	1.47924
ENSOARG00020011162	40.885	3.17574	1.04808	3.03006	0.00244505	0.0594354	1.00898
ENSOARG00020021501	1460.48	-2.57597	0.845967	-3.045	0.0023268	0.0594354	0.960466
ENSOARG00020004077	98.7249	-2.5802	0.886315	-2.91115	0.00360097	0.0595482	1.48023
ENSOARG00020020716	11.5037	-5.95287	2.01179	-2.95899	0.00308654	0.0597038	1.26295
ENSOARG00020017088	721.322	-3.52473	1.15887	-3.04152	0.00235385	0.0597581	0.958479
ENSOARG00020023347	67.649	3.83552	1.32268	2.89981	0.00373389	0.0597581	1.52196
ENSOARG00020009460	868.836	-2.26129	0.742132	-3.04701	0.00231126	0.0597974	0.938671
ENSOARG00020012369	33.9083	3.96585	1.34779	2.94248	0.00325591	0.0598288	1.31903
ENSOARG00020000737	11.5945	-5.96335	2.02105	-2.95062	0.00317134	0.0598578	1.26295
ENSOARG00020001788	80.6501	2.61538	0.879522	2.97364	0.00294291	0.0598578	1.18761
ENSOARG00020002905	442.533	-2.1657	0.746024	-2.90299	0.00369624	0.0598578	1.48023
ENSOARG00020006281	101.419	2.52073	0.872387	2.88947	0.00385895	0.0598578	1.533
ENSOARG00020010316	340.319	-2.10788	0.733494	-2.87376	0.00405622	0.0598578	1.61016
ENSOARG00020011513	830.603	-2.04259	0.678489	-3.0105	0.0026082	0.0598578	1.04392
ENSOARG00020013161	146.346	2.33901	0.806736	2.89935	0.00373934	0.0598578	1.48023
ENSOARG00020014850	64.8306	2.56374	0.884245	2.89936	0.00373927	0.0598578	1.47924
ENSOARG00020015175	50.8835	2.66209	0.915003	2.90938	0.00362149	0.0598578	1.44216
ENSOARG00020015656	13.6324	7.30711	2.48631	2.93894	0.00329336	0.0598578	1.32291
ENSOARG00020018064	36.1291	4.43527	1.50709	2.94293	0.00325125	0.0598578	1.29294
ENSOARG00020022940	35.6039	3.69785	1.25842	2.93848	0.00329823	0.0598578	1.31903
ENSOARG00020001951	41.5931	3.68998	1.25764	2.93406	0.0033456	0.0604152	1.30878
ENSOARG00020011496	695.97	-2.08644	0.695057	-3.00182	0.00268369	0.0605262	1.04392
ENSOARG00020026465	339.079	2.23908	0.780712	2.86799	0.00413088	0.0605262	1.60702
ENSOARG00020008124	27.074	3.8393	1.30793	2.93541	0.00333102	0.0605407	1.29294
ENSOARG00020015134	78.2511	2.42293	0.818327	2.96084	0.00306804	0.0605915	1.18761
ENSOARG00020006642	115.742	2.90402	1.03828	2.79695	0.0051587	0.0606126	1.98802
ENSOARG00020014679	34.5709	-5.09323	1.73671	-2.93269	0.00336039	0.0606126	1.29294
ENSOARG00020019209	11.1659	8.02795	2.73343	2.93695	0.00331459	0.0606126	1.27894
ENSOARG00020010861	13.2919	7.34335	2.48955	2.94967	0.00318117	0.0610794	1.21006
ENSOARG00020012462	89.8134	2.40849	0.837421	2.87608	0.00402651	0.0610794	1.533
ENSOARG00020008445	257.389	-2.17854	0.754928	-2.88576	0.00390467	0.0611719	1.48023
ENSOARG00020012387	184.829	2.39633	0.859334	2.78859	0.00529378	0.0616352	1.98802
ENSOARG00020005605	19.4182	-6.70736	2.23954	-2.99497	0.0027447	0.0618045	1.00898
ENSOARG00020005649	1480.64	-2.09581	0.701138	-2.98916	0.00279748	0.0618045	1.04392
ENSOARG00020006255	45.3304	-3.61016	1.23821	-2.91562	0.00354984	0.0618045	1.30878
ENSOARG00020007065	1352.61	-2.50036	0.837399	-2.98586	0.00282782	0.0618045	1.04392
ENSOARG00020010343	19.6865	-5.74468	1.97144	-2.91396	0.00356879	0.0618045	1.31903
ENSOARG00020012285	34.1911	-4.05882	1.38928	-2.92153	0.00348311	0.0618045	1.29366
ENSOARG00020013819	11.2297	6.45432	2.21146	2.91858	0.00351625	0.0618045	1.29366
ENSOARG00020017977	30.1183	3.19394	1.09288	2.92251	0.00347225	0.0618045	1.29294
ENSOARG00020020699	15.4554	4.80998	1.64615	2.92195	0.00347846	0.0618045	1.29366
ENSOARG00020026270	89.9921	2.74174	0.952841	2.87744	0.00400919	0.0618045	1.47924
ENSOARG00020008134	19.5715	4.07697	1.3973	2.91775	0.00352569	0.0618409	1.29294
ENSOARG00020011629	24.2854	-4.63642	1.59291	-2.91066	0.00360672	0.0618972	1.31903
ENSOARG00020010005	95.8532	-2.62319	0.944593	-2.77706	0.00548529	0.0622304	1.98802
ENSOARG00020026107	555.371	-2.58057	0.906729	-2.84602	0.00442697	0.0622304	1.60702
ENSOARG00020014228	556.914	-2.37607	0.835209	-2.84489	0.00444274	0.0622385	1.60702
ENSOARG00020010787	360.545	-2.87556	1.01236	-2.84045	0.00450495	0.0628722	1.61016
ENSOARG00020003171	34.2622	-4.12972	1.4197	-2.90887	0.00362736	0.0629301	1.29294
ENSOARG00020010491	185.063	2.27189	0.793221	2.86413	0.00418153	0.0632929	1.47924
ENSOARG00020003401	35.1141	4.16797	1.43512	2.90426	0.00368124	0.0635982	1.29294
ENSOARG00020018372	12.1823	-6.03041	2.07681	-2.90369	0.00368792	0.0635982	1.29366
ENSOARG00020000189	899.137	-2.6305	0.885803	-2.96962	0.00298173	0.0636065	1.04392
ENSOARG00020022855	63.0244	2.91937	1.00707	2.89887	0.00374507	0.0636077	1.30878
ENSOARG00020012187	12.8111	7.28309	2.51581	2.89493	0.00379242	0.0636092	1.32291
ENSOARG00020024260	556.965	-1.99175	0.696924	-2.85791	0.00426439	0.0638089	1.48023
ENSOARG00020005487	119.266	-2.58757	0.908788	-2.84727	0.00440954	0.0639957	1.52196
ENSOARG00020016038	16.0519	-5.43876	1.87164	-2.90588	0.00366219	0.0639957	1.26295
ENSOARG00020018081	24.0014	3.87901	1.33925	2.8964	0.00377471	0.0641208	1.29294
ENSOARG00020021817	27.9715	-4.34372	1.46096	-2.97319	0.00294721	0.0641208	1.00898
ENSOARG00020022416	12.8238	7.29399	2.49995	2.91765	0.0035268	0.0641208	1.21006
ENSOARG00020019401	41.3847	2.83166	0.980528	2.88789	0.00387831	0.0644302	1.31903
ENSOARG00020020565	518.292	-2.32986	0.824931	-2.82431	0.00473823	0.0644949	1.60702
ENSOARG00020024160	33.6687	4.23828	1.46593	2.89119	0.00383792	0.0648152	1.29294
ENSOARG00020004356	133.888	-3.01122	1.05867	-2.84434	0.0044503	0.0650172	1.48023
ENSOARG00020004927	135.521	-3.14351	1.10547	-2.84361	0.00446063	0.0650172	1.48023
ENSOARG00020006388	514.958	-2.25447	0.792372	-2.84521	0.0044382	0.0650172	1.48023
ENSOARG00020009578	234.541	-2.5979	0.913481	-2.84395	0.00445579	0.0650172	1.47924
ENSOARG00020017058	150.044	2.13827	0.751931	2.84371	0.00445916	0.0650172	1.47924
ENSOARG00020021272	1073.92	-2.17069	0.728167	-2.98103	0.00287284	0.0650172	0.958479
ENSOARG00020023843	800.339	2.21422	0.742509	2.98207	0.00286302	0.0650172	0.958942
ENSOARG00020006832	37.4549	-3.2879	1.13979	-2.88465	0.00391851	0.0651026	1.29366
ENSOARG00020017090	78.868	2.69184	0.934301	2.88113	0.00396255	0.0651026	1.30878
ENSOARG00020000266	52.957	2.61796	0.925517	2.82865	0.00467445	0.0653295	1.52196
ENSOARG00020001109	20.724	-4.84837	1.67893	-2.88777	0.00387979	0.0653295	1.26379
ENSOARG00020001665	85.8584	-3.72647	1.29525	-2.87702	0.00401445	0.0653295	1.30878
ENSOARG00020010804	71.8967	3.1978	1.12331	2.84677	0.00441654	0.0653295	1.44216
ENSOARG00020020927	42.0229	2.74027	0.951937	2.87863	0.00399409	0.0653295	1.30878
ENSOARG00020026194	842.482	-2.19366	0.737667	-2.97378	0.00294155	0.0653295	0.960466
ENSOARG00020000530	88.5688	-3.14506	1.09496	-2.87229	0.00407508	0.066002	1.30878
ENSOARG00020012725	110.341	-2.55487	0.901552	-2.83385	0.00459902	0.066002	1.47924
ENSOARG00020000050	71.1813	2.97544	1.04801	2.83914	0.00452357	0.0661528	1.44216
ENSOARG00020017517	424.469	2.42159	0.855545	2.83046	0.00464809	0.0661528	1.47924
ENSOARG00020021728	148.989	-2.85801	1.00924	-2.83185	0.00462796	0.0661528	1.48023
ENSOARG00020023960	1692.03	-2.30384	0.776697	-2.9662	0.00301504	0.0661528	0.960466
ENSOARG00020018507	1477.41	-2.8504	0.961543	-2.9644	0.00303272	0.0664999	0.958479
ENSOARG00020023857	3970.21	2.31215	0.780803	2.96124	0.003064	0.0670715	0.958479
ENSOARG00020003727	363.396	2.48612	0.889334	2.79549	0.0051821	0.0672006	1.60702
ENSOARG00020012159	72.5399	-2.72793	0.953163	-2.86197	0.0042101	0.0672006	1.30878
ENSOARG00020012727	253.016	-2.78209	0.985542	-2.82291	0.00475904	0.0672006	1.47924
ENSOARG00020023119	75.3101	3.04423	1.0785	2.82266	0.0047627	0.0672006	1.47924
ENSOARG00020024442	85.006	-3.06437	1.08605	-2.82157	0.00477889	0.0672114	1.47924
ENSOARG00020000142	16.1569	-5.44062	1.88694	-2.88331	0.00393522	0.0674939	1.21006
ENSOARG00020008677	31.2772	3.34566	1.13814	2.93958	0.00328656	0.0674939	1.00898
ENSOARG00020022523	10.5769	-5.8293	2.04231	-2.85427	0.00431353	0.0674939	1.32291
ENSOARG00020002748	8641.1	-1.95949	0.663486	-2.95333	0.00314367	0.0677781	0.958479
ENSOARG00020002966	1146.76	-2.83163	0.959682	-2.95059	0.0031717	0.0680077	0.958942
ENSOARG00020003055	58.1578	3.83622	1.36309	2.81436	0.00488744	0.0680077	1.47924
ENSOARG00020006229	176.898	-2.52464	0.928652	-2.71861	0.00655565	0.0680077	1.98802
ENSOARG00020021495	387.972	-2.29873	0.817399	-2.81226	0.00491953	0.0682685	1.47924
ENSOARG00020006719	12.8349	7.219	2.51098	2.87497	0.00404067	0.0684322	1.21006
ENSOARG00020006194	398.345	-3.07878	1.1063	-2.78295	0.00538667	0.0685791	1.60702
ENSOARG00020025950	238.095	-1.99598	0.710572	-2.80897	0.00497001	0.0685804	1.48023
ENSOARG00020020253	1951.76	3.20137	1.08752	2.94374	0.00324268	0.0689884	0.958479
ENSOARG00020000988	2215.02	-3.26141	1.12	-2.91198	0.00359146	0.0698925	1.04392
ENSOARG00020005805	211.898	-2.26007	0.814679	-2.77418	0.00553405	0.0698925	1.60702
ENSOARG00020006701	9458.32	-2.23985	0.762328	-2.93818	0.00330147	0.0698925	0.958479
ENSOARG00020005296	115.286	2.45493	0.876649	2.80036	0.00510454	0.0699053	1.47924
ENSOARG00020010910	33.3882	4.50167	1.58393	2.84209	0.00448193	0.0700687	1.29366
ENSOARG00020019445	386.167	2.01212	0.726419	2.76991	0.0056072	0.0703147	1.61016
ENSOARG00020003056	17.983	4.55228	1.60306	2.83973	0.00451513	0.070349	1.29366
ENSOARG00020014955	75.7604	2.38242	0.831144	2.86643	0.00415128	0.070349	1.18761
ENSOARG00020017864	96.304	3.02071	1.1194	2.6985	0.00696518	0.0703969	1.98802
ENSOARG00020009115	15.6178	-5.39689	1.8993	-2.84151	0.00449004	0.0704262	1.27894
ENSOARG00020009407	203.071	-2.35469	0.873003	-2.69723	0.00699194	0.070438	1.98802
ENSOARG00020003671	36.1253	2.7878	0.983093	2.83574	0.00457199	0.070551	1.29366
ENSOARG00020012622	1324.69	-3.23562	1.10466	-2.92906	0.0033999	0.070551	0.960466
ENSOARG00020019301	49.4122	-3.06439	1.1011	-2.78303	0.00538544	0.070551	1.52196
ENSOARG00020004246	244.152	-2.03861	0.733171	-2.78054	0.00542693	0.0706503	1.52196
ENSOARG00020006298	17.7489	4.95091	1.74569	2.83607	0.00456724	0.0706503	1.27894
ENSOARG00020010131	138.798	-2.99394	1.07402	-2.78761	0.00530989	0.0706503	1.47924
ENSOARG00020014513	67.1928	2.49237	0.896993	2.77858	0.00545973	0.0706503	1.52196
ENSOARG00020014626	72.4859	-3.25776	1.16526	-2.79573	0.00517828	0.0706503	1.44216
ENSOARG00020020982	307.044	-2.01149	0.728291	-2.76193	0.00574616	0.0706503	1.60702
ENSOARG00020023563	54.61	-3.07191	1.09784	-2.79814	0.00513974	0.0706503	1.44216
ENSOARG00020025852	2459.33	-2.57616	0.888139	-2.90063	0.00372416	0.0706503	1.04392
ENSOARG00020008610	18.2299	-4.76623	1.67221	-2.85026	0.0043684	0.0707111	1.21006
ENSOARG00020008805	40.6556	3.84896	1.36347	2.82292	0.00475883	0.0707111	1.31903
ENSOARG00020023869	114.141	3.26873	1.17349	2.78547	0.00534502	0.0707111	1.48023
ENSOARG00020002871	101.681	-3.29154	1.18236	-2.78387	0.00537153	0.0708846	1.47924
ENSOARG00020019951	4907.23	-2.6231	0.897947	-2.92122	0.0034866	0.0708846	0.960466
ENSOARG00020004966	295.172	2.13209	0.768675	2.77371	0.00554204	0.0709697	1.52196
ENSOARG00020001504	338.669	2.54203	0.914488	2.77973	0.00544046	0.0715145	1.47924
ENSOARG00020019838	117.558	2.46819	0.888081	2.77924	0.00544864	0.0715145	1.48023
ENSOARG00020009566	11.6587	4.72662	1.67087	2.82883	0.00467181	0.0717548	1.26295
ENSOARG00020004260	31.7791	-3.84756	1.36151	-2.82595	0.00471404	0.071905	1.26379
ENSOARG00020009683	44.3257	3.60557	1.26756	2.8445	0.00444809	0.071905	1.18761
ENSOARG00020011593	19.514	5.68462	1.96128	2.89843	0.00375036	0.071905	1.00898
ENSOARG00020015279	81.3863	2.28904	0.824864	2.77504	0.00551941	0.071905	1.47924
ENSOARG00020018275	154.288	2.25121	0.841257	2.67601	0.00745041	0.071905	1.98802
ENSOARG00020022882	92.2083	2.73612	0.986276	2.77419	0.00553385	0.071905	1.47924
ENSOARG00020026024	12.0135	7.18995	2.54354	2.82675	0.00470232	0.071905	1.26295
ENSOARG00020009467	38.1328	3.81049	1.31693	2.89347	0.00381007	0.0722267	1.00898
ENSOARG00020021458	4353.39	-2.59122	0.890506	-2.90983	0.0036163	0.0722267	0.958942
ENSOARG00020010848	51.6841	2.70635	0.963411	2.80913	0.0049675	0.0723349	1.30878
ENSOARG00020011057	29.4167	-5.52235	1.95841	-2.81981	0.00480524	0.0723349	1.26379
ENSOARG00020012499	11.6771	7.1562	2.54528	2.81155	0.00493029	0.0723349	1.29366
ENSOARG00020017413	2545.88	-2.4368	0.836057	-2.91463	0.00356109	0.0723349	0.938671
ENSOARG00020018582	14.6944	5.12869	1.82151	2.81563	0.00486814	0.0723349	1.27894
ENSOARG00020000690	25.7954	4.44431	1.58003	2.8128	0.00491118	0.0725744	1.26379
ENSOARG00020002907	26.6516	-4.00371	1.42995	-2.79989	0.00511198	0.0725744	1.31903
ENSOARG00020010427	33.6863	-4.85228	1.72855	-2.80715	0.00499827	0.0725744	1.29366
ENSOARG00020011537	16.982	4.96848	1.76957	2.80773	0.00498923	0.0725744	1.29366
ENSOARG00020012441	130.658	-2.5501	0.927502	-2.74943	0.00596998	0.0725744	1.533
ENSOARG00020020022	832.754	-2.55365	0.880543	-2.90008	0.00373064	0.0725744	0.958942
ENSOARG00020021653	12.0135	7.18995	2.54354	2.82675	0.00470232	0.0725744	1.21006
ENSOARG00020022123	592.231	-2.69926	0.976001	-2.76563	0.00568132	0.0725744	1.48023
ENSOARG00020022797	223.212	1.9277	0.705028	2.73422	0.00625287	0.0725744	1.60702
ENSOARG00020025239	99.5385	2.77748	1.00816	2.75501	0.00586907	0.0725744	1.52196
ENSOARG00020026141	14.4563	6.83648	2.43501	2.80758	0.00499152	0.0725744	1.29366
ENSOARG00020026245	169.73	2.28415	0.825999	2.76532	0.00568671	0.0725744	1.48023
ENSOARG00020012975	22.6971	4.79769	1.66474	2.88194	0.00395237	0.0728903	1.00898
ENSOARG00020012042	9.96954	7.86416	2.79945	2.80918	0.00496682	0.0730689	1.26295
ENSOARG00020003517	21.8586	5.95299	2.06793	2.87872	0.00399296	0.0731971	1.00898
ENSOARG00020023282	25.1503	-3.7982	1.35644	-2.80013	0.00510825	0.0731971	1.29366
ENSOARG00020024831	92.1058	2.15611	0.785639	2.7444	0.00606209	0.0731971	1.533
ENSOARG00020011842	13.4148	-5.17494	1.85537	-2.78917	0.00528439	0.0735525	1.32291
ENSOARG00020014015	48.6508	3.44611	1.24802	2.76127	0.00575778	0.0735525	1.44216
ENSOARG00020019421	103.114	-2.21929	0.808669	-2.74437	0.00606263	0.0735525	1.52196
ENSOARG00020011636	506.795	2.24972	0.818613	2.74821	0.0059921	0.0744779	1.47924
ENSOARG00020008920	31.6016	3.52791	1.23014	2.8679	0.00413208	0.0750721	1.00898
ENSOARG00020017772	117.828	-2.78435	1.05215	-2.64635	0.00813664	0.0750721	1.98802
ENSOARG00020016449	1019.79	1.95956	0.6799	2.88213	0.00395002	0.0753975	0.958942
ENSOARG00020010211	88.3734	2.89356	1.05883	2.73278	0.00628018	0.0754179	1.52196
ENSOARG00020026467	28.3441	4.73771	1.70479	2.77906	0.00545165	0.0754288	1.31903
ENSOARG00020000661	573.306	-1.87067	0.682672	-2.74022	0.00613975	0.0754676	1.48023
ENSOARG00020008756	191.537	2.53325	0.92772	2.73062	0.00632156	0.0754676	1.52196
ENSOARG00020017085	94.3869	2.80619	1.02411	2.74013	0.0061415	0.0754676	1.47924
ENSOARG00020014466	57.8321	2.86149	1.02961	2.77921	0.00544918	0.075538	1.30878
ENSOARG00020009900	112.002	2.10988	0.799933	2.63758	0.0083501	0.07606	1.98802
ENSOARG00020012980	63.4267	3.27687	1.19427	2.74383	0.00607269	0.07606	1.44216
ENSOARG00020021801	46.1153	-3.38249	1.23266	-2.74405	0.00606863	0.07606	1.44216
ENSOARG00020009065	33.9463	3.11326	1.08918	2.85835	0.00425845	0.0761238	1.00898
ENSOARG00020011592	4158.31	-2.40782	0.835835	-2.88073	0.00396752	0.0761245	0.938671
ENSOARG00020021579	5390.29	-2.00941	0.706276	-2.84508	0.00444	0.0764895	1.04392
ENSOARG00020000439	2553.15	-2.15421	0.757387	-2.84427	0.00445135	0.0765734	1.04392
ENSOARG00020012239	53.0873	2.61236	0.9436	2.7685	0.00563143	0.0771567	1.30878
ENSOARG00020024383	2276.66	-2.14613	0.748601	-2.86685	0.0041458	0.0772888	0.960466
ENSOARG00020012297	38.2913	-3.32719	1.16762	-2.84955	0.00437817	0.0775834	1.00898
ENSOARG00020013805	2025.59	-2.05712	0.716633	-2.87053	0.00409782	0.0779419	0.938671
ENSOARG00020007810	461.899	2.01111	0.74647	2.69416	0.00705658	0.0781718	1.60702
ENSOARG00020024901	9.93717	-5.74133	2.08128	-2.75855	0.0058058	0.0781718	1.32291
ENSOARG00020000222	23.8686	-3.78242	1.36902	-2.76287	0.00572948	0.0783952	1.29294
ENSOARG00020007924	251.393	-2.46509	0.906687	-2.71879	0.00655209	0.0783952	1.47924
ENSOARG00020013767	9.57076	7.80516	2.8247	2.76318	0.00572411	0.0783952	1.29366
ENSOARG00020016876	65.5698	-2.96759	1.09549	-2.70891	0.00675045	0.0783952	1.52196
ENSOARG00020021956	120.514	-2.33413	0.891216	-2.61904	0.00881769	0.0783952	1.98802
ENSOARG00020025959	92.2619	3.12658	1.1511	2.71616	0.00660439	0.0787472	1.48023
ENSOARG00020007831	345.032	-2.08386	0.770774	-2.7036	0.0068593	0.0793368	1.52196
ENSOARG00020022706	476.673	-2.1229	0.785237	-2.70352	0.00686098	0.0793368	1.52196
ENSOARG00020012554	13.6588	6.75512	2.45772	2.74853	0.00598635	0.0793742	1.32291
ENSOARG00020015036	835.203	-2.04201	0.715974	-2.85208	0.00434345	0.0793742	0.958942
ENSOARG00020019997	882.152	-2.40628	0.851589	-2.82564	0.00471863	0.0793742	1.04392
ENSOARG00020005603	130.618	2.27546	0.843558	2.69746	0.00698706	0.0795669	1.533
ENSOARG00020022562	195.242	2.73396	1.01358	2.69732	0.0069901	0.0795669	1.533
ENSOARG00020023535	120.754	3.11888	1.15526	2.69972	0.00693976	0.0795669	1.52196
ENSOARG00020010987	109.017	-2.71734	1.00706	-2.6983	0.00696937	0.0797463	1.52196
ENSOARG00020014584	199.668	-2.06859	0.764087	-2.70727	0.00678387	0.0797463	1.48023
ENSOARG00020017271	1256.39	-2.1746	0.770967	-2.82062	0.00479316	0.0797823	1.04392
ENSOARG00020007832	106.443	-2.88143	1.06843	-2.69687	0.00699937	0.0797987	1.52196
ENSOARG00020006420	9.92448	-5.7403	2.09332	-2.74221	0.00610282	0.0798614	1.32291
ENSOARG00020009854	14115.5	-1.85074	0.656536	-2.81894	0.00481818	0.0798614	1.04392
ENSOARG00020020567	74.4185	3.19133	1.18429	2.69472	0.00704475	0.0799786	1.52196
ENSOARG00020005646	9907.84	-2.31272	0.821582	-2.81496	0.00487831	0.0805763	1.04392
ENSOARG00020008414	92.4331	-2.82842	1.04726	-2.70079	0.0069175	0.0805763	1.47924
ENSOARG00020022309	231.37	-2.18302	0.808671	-2.69952	0.00694396	0.0807175	1.48023
ENSOARG00020019231	231.237	2.18697	0.81867	2.67137	0.00755429	0.0807715	1.60702
ENSOARG00020014642	86.5518	3.10766	1.13481	2.73849	0.00617223	0.0808188	1.30878
ENSOARG00020015301	417.438	2.38021	0.882305	2.69771	0.00698177	0.0808188	1.48023
ENSOARG00020012577	3589.37	2.05008	0.722286	2.83833	0.00453503	0.0808481	0.958479
ENSOARG00020016190	218.799	2.40875	0.893059	2.69719	0.00699272	0.0808481	1.47924
ENSOARG00020010070	46.4333	2.77109	1.02773	2.69633	0.00701074	0.0808717	1.47924
ENSOARG00020022482	21.6423	3.37221	1.23149	2.73831	0.0061756	0.0813898	1.29294
ENSOARG00020022226	78.9107	2.56182	0.948879	2.69984	0.00693736	0.0818563	1.44216
ENSOARG00020021119	256.277	2.21809	0.82745	2.68063	0.0073484	0.082047	1.52196
ENSOARG00020012833	133.279	-2.94757	1.13841	-2.5892	0.00961998	0.0821163	1.98802
ENSOARG00020014447	457.697	-2.51645	0.936127	-2.68815	0.00718493	0.0823119	1.47924
ENSOARG00020011753	89.657	-2.29047	0.885293	-2.58724	0.00967483	0.082358	1.98802
ENSOARG00020020466	17.1343	4.61476	1.68761	2.7345	0.00624753	0.0825551	1.27894
ENSOARG00020023947	690.438	2.66126	0.941348	2.82707	0.00469754	0.0827142	0.958479
ENSOARG00020023205	292.679	1.9635	0.739503	2.65517	0.00792695	0.083135	1.60702
ENSOARG00020013103	395.697	2.09861	0.791277	2.65218	0.00799748	0.0831431	1.61016
ENSOARG00020013741	178.957	-2.42993	0.941704	-2.58035	0.00987004	0.0831431	1.98802
ENSOARG00020014816	412.748	-2.17273	0.819217	-2.6522	0.00799694	0.0831431	1.61016
ENSOARG00020021354	48.5412	3.2358	1.20652	2.68192	0.00732002	0.0831431	1.47924
ENSOARG00020026100	101.549	2.31586	0.897055	2.58163	0.00983349	0.0831431	1.98802
ENSOARG00020025506	10.7444	7.03856	2.5799	2.72823	0.00636747	0.0832279	1.27894
ENSOARG00020001563	252.84	2.69497	1.00996	2.66839	0.00762163	0.083375	1.52196
ENSOARG00020006708	50.6238	3.02588	1.1299	2.678	0.00740638	0.083375	1.47924
ENSOARG00020019398	681.086	-2.01502	0.714467	-2.82032	0.00479761	0.083375	0.958942
ENSOARG00020019107	54.1927	2.42839	0.907357	2.67634	0.00744314	0.0835494	1.47924
ENSOARG00020024824	568.108	2.09099	0.784088	2.66678	0.00765818	0.0835494	1.52196
ENSOARG00020010905	20.1989	4.55314	1.66933	2.72753	0.00638103	0.0837248	1.26379
ENSOARG00020016746	13.3247	4.63661	1.71024	2.71109	0.0067063	0.0839469	1.32291
ENSOARG00020011252	555.607	2.77489	1.04935	2.64439	0.00818382	0.0840539	1.61016
ENSOARG00020016862	154.447	2.72093	1.02319	2.65927	0.00783093	0.0843647	1.533
ENSOARG00020002521	60.9596	2.36301	0.885086	2.66981	0.0075894	0.0845078	1.47924
ENSOARG00020012880	28.3523	4.32542	1.59327	2.71481	0.00663143	0.0845078	1.29366
ENSOARG00020020599	187.322	2.11641	0.793123	2.66845	0.00762032	0.0847389	1.47924
ENSOARG00020000483	31.1675	3.6622	1.34638	2.72003	0.00652752	0.0847403	1.26379
ENSOARG00020006498	912.07	-2.2434	0.7964	-2.81693	0.00484855	0.0847403	0.938671
ENSOARG00020002285	1128.65	-2.07301	0.745374	-2.78117	0.00541636	0.0850072	1.04392
ENSOARG00020019894	266.634	-2.14412	0.813057	-2.63711	0.00836162	0.085135	1.60702
ENSOARG00020000116	54.8479	3.57676	1.34367	2.66194	0.00776919	0.08537	1.47924
ENSOARG00020006597	126.962	2.80797	1.05453	2.66277	0.00774998	0.08537	1.48023
ENSOARG00020018833	96.4074	2.32038	0.874704	2.65275	0.0079838	0.08537	1.52196
ENSOARG00020021979	171.441	-3.07239	1.15834	-2.6524	0.0079921	0.08537	1.52196
ENSOARG00020025015	505.789	-2.2425	0.850929	-2.63536	0.00840484	0.08537	1.60702
ENSOARG00020000421	68.7997	2.74623	1.0066	2.72822	0.00636777	0.0854926	1.18761
ENSOARG00020003900	57.2513	2.37966	0.871738	2.72979	0.00633749	0.0854926	1.18761
ENSOARG00020006976	523.576	1.85658	0.706245	2.6288	0.00856859	0.0854926	1.60702
ENSOARG00020008248	2545.55	-1.83566	0.656765	-2.795	0.00518994	0.0854926	0.958942
ENSOARG00020009445	24.7535	3.98166	1.4794	2.6914	0.00711525	0.0854926	1.31903
ENSOARG00020009539	349.113	-2.06066	0.77687	-2.65251	0.0079895	0.0854926	1.48023
ENSOARG00020010598	248.18	-2.19654	0.835344	-2.6295	0.00855094	0.0854926	1.61016
ENSOARG00020011435	276.565	-2.30512	0.876386	-2.63026	0.00853203	0.0854926	1.60702
ENSOARG00020012255	11.8732	-5.99876	2.21302	-2.71067	0.00671475	0.0854926	1.26295
ENSOARG00020013244	262.571	2.17855	0.829269	2.62707	0.00861239	0.0854926	1.61016
ENSOARG00020014018	10.5624	-5.82354	2.15517	-2.70213	0.00688972	0.0854926	1.27894
ENSOARG00020014594	4733.06	-2.50224	0.895015	-2.79575	0.00517791	0.0854926	0.958479
ENSOARG00020015079	34.4447	3.82774	1.42194	2.69191	0.00710437	0.0854926	1.31903
ENSOARG00020017472	30.9572	3.46215	1.2775	2.71009	0.00672648	0.0854926	1.26379
ENSOARG00020019017	3523.9	-1.94991	0.696244	-2.80062	0.0051005	0.0854926	0.960466
ENSOARG00020020436	14.1963	-5.25493	1.94515	-2.70156	0.00690152	0.0854926	1.27894
ENSOARG00020021035	21.4271	-3.97843	1.4736	-2.6998	0.00693801	0.0854926	1.29366
ENSOARG00020021858	8.91189	7.71202	2.85545	2.70081	0.00691715	0.0854926	1.27894
ENSOARG00020023593	1489.19	-1.9667	0.702983	-2.79765	0.00514752	0.0854926	0.958479
ENSOARG00020025217	622.302	-1.89549	0.714139	-2.65422	0.0079491	0.0854926	1.48023
ENSOARG00020025433	35.8272	-3.45565	1.27397	-2.7125	0.00667785	0.0854926	1.26379
ENSOARG00020026195	2296.93	-2.38351	0.851835	-2.7981	0.00514049	0.0854926	0.958479
ENSOARG00020004781	36.2751	-3.12312	1.15886	-2.69501	0.00703873	0.0856409	1.29294
ENSOARG00020004819	22.5797	4.49558	1.66922	2.69322	0.00707665	0.0856409	1.29294
ENSOARG00020006358	173.367	-2.69758	1.01852	-2.64853	0.00808431	0.0856409	1.48023
ENSOARG00020008279	8.91189	7.71202	2.85545	2.70081	0.00691715	0.0856409	1.26295
ENSOARG00020019239	93.7105	2.09742	0.795034	2.63815	0.00833589	0.0856409	1.52196
ENSOARG00020021046	44.4417	2.54332	0.96329	2.64024	0.00828473	0.0856409	1.52196
ENSOARG00020021884	12.2604	5.34228	1.98006	2.69803	0.00697507	0.0856409	1.27894
ENSOARG00020025677	93.1672	2.22348	0.873052	2.54679	0.0108718	0.0856409	1.98802
ENSOARG00020019012	21.0477	4.733	1.75885	2.69097	0.00712455	0.0860518	1.29294
ENSOARG00020005882	37.0174	3.56275	1.32117	2.69667	0.0070037	0.0864346	1.26379
ENSOARG00020018264	276.601	2.31545	0.879218	2.63353	0.00845027	0.0864872	1.52196
ENSOARG00020009704	163.729	2.35041	0.892827	2.63255	0.00847466	0.0865184	1.52196
ENSOARG00020018610	102.996	2.70925	1.0291	2.63263	0.00847262	0.0865184	1.52196
ENSOARG00020007006	14.6923	-5.31393	1.97821	-2.68624	0.00722619	0.0865736	1.29366
ENSOARG00020016800	578.639	2.14937	0.813823	2.64108	0.00826417	0.0865736	1.48023
ENSOARG00020010693	50.3693	-3.79073	1.41402	-2.68083	0.00734405	0.0868602	1.30878
ENSOARG00020025957	296.102	2.00174	0.758635	2.63861	0.00832458	0.0870022	1.47924
ENSOARG00020001470	9.33096	-5.64805	2.1123	-2.67388	0.00749783	0.0875118	1.32291
ENSOARG00020020312	6636.56	-2.88499	1.03869	-2.77754	0.00547729	0.0879434	0.960466
ENSOARG00020023522	13.2886	-5.16131	1.92486	-2.68139	0.0073316	0.0882927	1.27894
ENSOARG00020007127	265.403	1.88509	0.716886	2.62955	0.00854972	0.0889096	1.47924
ENSOARG00020002677	146.202	-3.22707	1.23315	-2.61693	0.00887238	0.0891656	1.52196
ENSOARG00020004888	180.993	1.9905	0.757605	2.62737	0.00860487	0.0891656	1.48023
ENSOARG00020007776	83.9789	-3.11735	1.18655	-2.62725	0.00860776	0.0891656	1.47924
ENSOARG00020009956	88.7189	-2.49171	0.95341	-2.61347	0.00896286	0.0891656	1.533
ENSOARG00020012320	7149.93	-2.22077	0.801772	-2.76983	0.00560853	0.0891656	0.960466
ENSOARG00020014481	437.709	2.26367	0.871628	2.59706	0.00940268	0.0891656	1.60702
ENSOARG00020016399	22.3033	3.26096	1.22069	2.6714	0.00755348	0.0891656	1.29366
ENSOARG00020021922	17.1618	5.21671	1.95345	2.67052	0.00757344	0.0891656	1.29366
ENSOARG00020019427	11.0951	5.29808	1.99024	2.66203	0.00776699	0.089312	1.32291
ENSOARG00020002896	262.983	2.21655	0.855337	2.59143	0.0095577	0.0893416	1.60702
ENSOARG00020009881	204.96	2.13124	0.846771	2.51691	0.0118391	0.0893416	1.98802
ENSOARG00020012086	49.0774	2.53647	0.952798	2.66213	0.00776478	0.0893416	1.30878
ENSOARG00020013456	181.703	-2.32781	0.891994	-2.60967	0.00906307	0.0893416	1.52196
ENSOARG00020014090	287.28	-2.11334	0.806172	-2.62145	0.00875563	0.0893416	1.48023
ENSOARG00020018832	50.2707	2.90462	1.10812	2.62121	0.00876193	0.0893416	1.47924
ENSOARG00020019708	164.192	2.38294	0.945687	2.51979	0.0117423	0.0893416	1.98802
ENSOARG00020023238	105.028	2.15146	0.824486	2.60946	0.00906863	0.0893416	1.533
ENSOARG00020023393	265.562	-2.67401	1.03184	-2.59149	0.00955611	0.0893416	1.61016
ENSOARG00020023870	73.2993	-2.52114	0.957998	-2.63167	0.00849656	0.0893416	1.44216
ENSOARG00020025492	189.338	-2.40633	0.922187	-2.60937	0.00907082	0.0893416	1.52196
ENSOARG00020025771	417.144	-2.91686	1.11645	-2.61263	0.00898497	0.0893416	1.52196
ENSOARG00020015957	228.276	-2.10752	0.808265	-2.60746	0.00912159	0.0897325	1.52196
ENSOARG00020004751	75.6109	-2.61611	0.984494	-2.65731	0.00787658	0.0897331	1.30878
ENSOARG00020017391	305.98	-1.94877	0.745137	-2.61531	0.00891463	0.0897331	1.48023
ENSOARG00020017397	152.605	2.03893	0.779344	2.61621	0.00889124	0.0897331	1.48023
ENSOARG00020022407	16.29	4.43627	1.67172	2.65372	0.00796096	0.0897331	1.32291
ENSOARG00020014233	18.2725	-5.63577	2.12531	-2.65174	0.00800781	0.0900818	1.32291
ENSOARG00020022605	580.563	-2.13669	0.817662	-2.61317	0.0089707	0.0901404	1.47924
ENSOARG00020017796	140.557	2.16471	0.829133	2.61081	0.00903285	0.0906556	1.47924
ENSOARG00020010032	357.497	-3.04838	1.16832	-2.60919	0.00907557	0.0908047	1.48023
ENSOARG00020010890	27.9428	4.6634	1.75638	2.65513	0.0079279	0.0908047	1.29366
ENSOARG00020003033	913.445	-2.40847	0.875899	-2.74972	0.00596471	0.0911862	0.958942
ENSOARG00020009039	12.3284	-5.05114	1.89855	-2.66053	0.00780185	0.0911862	1.26295
ENSOARG00020009062	5527.11	-1.89139	0.687681	-2.75039	0.00595243	0.0911862	0.958479
ENSOARG00020010120	29.0421	2.76419	1.01122	2.73352	0.00626613	0.0911862	1.00898
ENSOARG00020011136	9.26948	-5.63686	2.13272	-2.64303	0.00821667	0.0911862	1.32291
ENSOARG00020014682	44.8515	-4.1232	1.55828	-2.64599	0.00814512	0.0911862	1.30878
ENSOARG00020016982	1015.88	-2.09298	0.761012	-2.75025	0.00595493	0.0911862	0.958942
ENSOARG00020017237	9.28028	-5.63869	2.13144	-2.64549	0.00815724	0.0911862	1.32291
ENSOARG00020021339	442.329	-2.21115	0.848707	-2.60532	0.00917894	0.0911862	1.48023
ENSOARG00020020724	22.8372	-3.42947	1.29078	-2.6569	0.00788618	0.091322	1.26379
ENSOARG00020009587	8.97411	6.14386	2.30018	2.67103	0.00756179	0.0913451	1.21006
ENSOARG00020004393	148.55	-2.15133	0.829931	-2.59217	0.00953713	0.0913806	1.52196
ENSOARG00020006169	158.146	-2.69469	1.04039	-2.59008	0.00959522	0.0913806	1.533
ENSOARG00020017040	52.9925	-3.63094	1.37409	-2.64244	0.008231	0.0914956	1.30878
ENSOARG00020017209	21.3269	-4.4482	1.6807	-2.64663	0.00812984	0.0914956	1.29366
ENSOARG00020000412	14.1957	3.91999	1.47704	2.65394	0.0079557	0.0915169	1.26295
ENSOARG00020012464	75.5244	-2.8336	1.08992	-2.59982	0.00932715	0.0915169	1.47924
ENSOARG00020006530	15.3647	5.31917	2.00831	2.64858	0.00808316	0.0915982	1.27894
ENSOARG00020008081	1047.68	-2.08639	0.768207	-2.71592	0.00660917	0.0915982	1.04392
ENSOARG00020022154	235.437	-2.32885	0.896294	-2.59831	0.00936838	0.0915982	1.47924
ENSOARG00020019253	12.3602	-5.05853	1.92002	-2.63463	0.00842302	0.0916568	1.32291
ENSOARG00020019866	469.133	2.21124	0.851612	2.59654	0.00941678	0.0916568	1.47924
ENSOARG00020020779	45.5064	-2.62565	1.00774	-2.60549	0.0091743	0.0916568	1.44216
ENSOARG00020021346	10.0243	-5.74886	2.17177	-2.64708	0.00811899	0.0916568	1.27894
ENSOARG00020010530	148.992	-2.63134	1.05625	-2.49122	0.0127306	0.0919536	1.98802
ENSOARG00020010934	72.3832	-2.31439	0.889133	-2.60297	0.00924191	0.0919536	1.44216
ENSOARG00020026358	41.9862	2.86353	1.10014	2.60289	0.00924425	0.0919536	1.44216
ENSOARG00020010541	70.4707	2.53821	0.963591	2.63411	0.00843576	0.0923558	1.30878
ENSOARG00020001349	12.0982	-5.02127	1.91046	-2.6283	0.00858134	0.09261	1.32291
ENSOARG00020002421	2240.93	2.44358	0.893422	2.73508	0.00623658	0.09261	0.960466
ENSOARG00020013282	1619.86	-2.00951	0.734621	-2.73544	0.00622971	0.09261	0.960466
ENSOARG00020019992	12.9609	-5.12609	1.94162	-2.64011	0.00828782	0.09261	1.27894
ENSOARG00020003288	520.889	2.46184	0.952905	2.58351	0.00978005	0.0932292	1.47924
ENSOARG00020004250	12.4999	-5.07069	1.92484	-2.63435	0.00842993	0.0932292	1.27894
ENSOARG00020004853	117.479	2.58194	0.999156	2.58412	0.00976276	0.0932292	1.47924
ENSOARG00020005780	14.5856	5.23162	1.98946	2.62966	0.00854699	0.0932292	1.29366
ENSOARG00020008829	18.8429	5.16408	1.96254	2.63133	0.00850509	0.0932292	1.29366
ENSOARG00020013473	93.047	-3.23884	1.25745	-2.57572	0.010003	0.0932292	1.52196
ENSOARG00020014713	43.6771	-3.17606	1.22451	-2.59374	0.00949391	0.0932292	1.44216
ENSOARG00020021699	2203.98	-2.0952	0.775289	-2.70248	0.00688237	0.0932292	1.04392
ENSOARG00020024064	398.635	2.1121	0.826732	2.55476	0.010626	0.0932292	1.60702
ENSOARG00020025930	31.012	3.45439	1.30891	2.63914	0.00831173	0.0932292	1.26379
ENSOARG00020000075	10.8531	5.26104	2.00821	2.61977	0.00879891	0.093245	1.32291
ENSOARG00020001846	187.361	-2.59677	1.01171	-2.56671	0.0102667	0.093245	1.533
ENSOARG00020002598	163.707	2.08069	0.806971	2.5784	0.00992603	0.093245	1.47924
ENSOARG00020006237	65.8396	2.55646	0.975181	2.62152	0.00875375	0.093245	1.30878
ENSOARG00020007032	11.6363	5.67788	2.15986	2.62882	0.00856813	0.093245	1.27894
ENSOARG00020008421	490.561	-1.71958	0.668356	-2.57285	0.0100864	0.093245	1.52196
ENSOARG00020009710	79.0563	3.08613	1.19248	2.58799	0.00965387	0.093245	1.44216
ENSOARG00020010073	42.4752	3.36553	1.28438	2.62035	0.00878406	0.093245	1.30878
ENSOARG00020019754	57.4736	-2.68978	1.01235	-2.65697	0.00788465	0.093245	1.18761
ENSOARG00020022772	10.3791	-5.80454	2.20806	-2.6288	0.00856869	0.093245	1.27894
ENSOARG00020023793	23.2382	2.91296	1.11127	2.62129	0.00875971	0.093245	1.31903
ENSOARG00020025214	431.52	-1.97288	0.768084	-2.56857	0.0102118	0.093245	1.52196
ENSOARG00020025302	67.9348	2.49234	0.950127	2.62316	0.00871176	0.093245	1.30878
ENSOARG00020024228	1772.45	-2.1695	0.796691	-2.72314	0.00646646	0.093625	0.958479
ENSOARG00020007711	462.54	-2.30242	0.904457	-2.54564	0.0109078	0.0936828	1.60702
ENSOARG00020008825	17.5063	4.53402	1.72993	2.62093	0.00876912	0.0936828	1.29366
ENSOARG00020016969	818.539	-2.13015	0.790844	-2.69351	0.00707036	0.0936828	1.04392
ENSOARG00020022120	69.6402	-2.49074	0.967515	-2.57437	0.0100421	0.0936828	1.47924
ENSOARG00020024031	112.746	-2.66918	1.04168	-2.56237	0.0103961	0.0936828	1.533
ENSOARG00020000426	9.24982	-5.63886	2.14559	-2.62811	0.00858602	0.0937112	1.26295
ENSOARG00020007670	21.4691	-4.4591	1.70679	-2.61256	0.0089868	0.0937407	1.31903
ENSOARG00020010866	457.343	2.14042	0.83533	2.56236	0.0103964	0.0937407	1.52196
ENSOARG00020015712	50.375	3.31709	1.26869	2.61459	0.00893352	0.0937407	1.30878
ENSOARG00020024339	205.675	-2.5052	0.973829	-2.57253	0.010096	0.0937407	1.48023
ENSOARG00020014449	18.1578	-4.65138	1.77182	-2.6252	0.00865992	0.0939927	1.26295
ENSOARG00020000763	892.277	-2.32305	0.863954	-2.68886	0.00716969	0.0940284	1.04392
ENSOARG00020013709	20.7495	-4.13504	1.57583	-2.62404	0.00868943	0.0940284	1.26379
ENSOARG00020022327	44.0583	2.66355	1.01997	2.61139	0.00901745	0.0940284	1.30878
ENSOARG00020025721	62.391	3.33311	1.30222	2.55955	0.0104806	0.0940284	1.52196
ENSOARG00020004547	194.201	2.10151	0.822347	2.55551	0.0106033	0.0940762	1.52196
ENSOARG00020005013	9.0692	-5.60649	2.15322	-2.60377	0.00922036	0.0940762	1.32291
ENSOARG00020012238	168.676	-2.29769	0.895687	-2.56528	0.0103093	0.0940762	1.47924
ENSOARG00020012877	20.4112	5.33955	2.03721	2.62101	0.00876697	0.0940762	1.26379
ENSOARG00020013584	1092	-2.09908	0.781526	-2.68587	0.00723408	0.0940762	1.04392
ENSOARG00020015605	305.004	2.04315	0.799509	2.55551	0.0106033	0.0940762	1.52196
ENSOARG00020016052	132.002	-2.25121	0.880074	-2.55798	0.0105283	0.0940762	1.52196
ENSOARG00020016397	69.8349	2.32512	0.891511	2.60806	0.00910557	0.0940762	1.30878
ENSOARG00020018926	137.359	2.14832	0.872699	2.4617	0.0138282	0.0940762	1.98802
ENSOARG00020021942	2018.96	-2.1871	0.813894	-2.6872	0.00720542	0.0940762	1.04392
ENSOARG00020004680	103.307	2.06278	0.805105	2.56212	0.0104035	0.0947228	1.47924
ENSOARG00020020780	13.2185	6.39005	2.44961	2.6086	0.00909144	0.0947228	1.29366
ENSOARG00020004840	54.865	2.69988	1.03711	2.60326	0.00923416	0.094923	1.30878
ENSOARG00020004041	198.773	2.17963	0.851223	2.56058	0.0104496	0.0949356	1.47924
ENSOARG00020006120	1599.31	-1.93846	0.716226	-2.70649	0.00679986	0.0950012	0.960466
ENSOARG00020013345	157.515	2.22133	0.867973	2.55921	0.010491	0.0950012	1.47924
ENSOARG00020023501	135.255	-3.00875	1.18022	-2.54931	0.0107937	0.0950012	1.52196
ENSOARG00020005536	239.821	-2.19828	0.869257	-2.52892	0.0114415	0.0950809	1.61016
ENSOARG00020024616	20.1728	3.68424	1.41918	2.59603	0.00943068	0.0955557	1.31903
ENSOARG00020026297	254.4	1.88976	0.739395	2.55582	0.0105937	0.0955557	1.48023
ENSOARG00020020102	304.542	1.84378	0.724509	2.54487	0.0109319	0.0957991	1.52196
ENSOARG00020007770	289.742	2.00024	0.792717	2.52326	0.0116271	0.0959847	1.61016
ENSOARG00020013286	9.79478	-5.71424	2.19116	-2.60787	0.00911086	0.0959847	1.26295
ENSOARG00020015235	144.511	-2.58357	1.01171	-2.55366	0.0106598	0.0959847	1.47924
ENSOARG00020026113	243.3	-2.4092	0.943816	-2.55262	0.0106917	0.0959847	1.47924
ENSOARG00020004268	65.304	-2.82278	1.1032	-2.55871	0.0105061	0.0966394	1.44216
ENSOARG00020002483	11.8263	-4.97971	1.92403	-2.58817	0.00964877	0.0966496	1.32291
ENSOARG00020008451	3380.79	2.23423	0.828809	2.69572	0.00702377	0.0968014	0.960466
ENSOARG00020000944	263.115	-3.29344	1.30771	-2.51847	0.0117867	0.0968799	1.60702
ENSOARG00020010900	195.773	-2.16978	0.85178	-2.54735	0.0108543	0.0968799	1.48023
ENSOARG00020013994	26.6476	4.35852	1.67536	2.60154	0.00928057	0.0968945	1.26379
ENSOARG00020003086	32.2763	2.96371	1.14327	2.5923	0.00953366	0.0970608	1.29366
ENSOARG00020017542	598.46	2.00843	0.792036	2.53578	0.0112196	0.0970608	1.52196
ENSOARG00020015993	126.827	2.07145	0.817165	2.53492	0.0112474	0.0971977	1.52196
ENSOARG00020008639	187.406	-2.17765	0.892792	-2.43915	0.014722	0.0971982	1.98802
ENSOARG00020018498	148.908	-2.76341	1.08619	-2.54413	0.0109551	0.0971982	1.47924
ENSOARG00020004598	151.571	2.04757	0.839647	2.43861	0.0147438	0.0972321	1.98802
ENSOARG00020007889	15.428	5.68524	2.17679	2.61175	0.00900802	0.097436	1.21006
ENSOARG00020024474	572.148	-2.22133	0.873795	-2.54216	0.0110169	0.097436	1.47924
ENSOARG00020011258	9.19496	-5.62577	2.17171	-2.59048	0.0095842	0.097936	1.27894
ENSOARG00020000393	27.579	-3.56484	1.33545	-2.6694	0.00759875	0.0981109	1.00898
ENSOARG00020019777	140.082	2.09388	0.828068	2.52864	0.0114507	0.0981109	1.52196
ENSOARG00020026214	174.211	2.26306	0.895827	2.52622	0.0115297	0.0981109	1.533
ENSOARG00020019697	73.6009	2.30457	0.893419	2.5795	0.00989442	0.0983842	1.30878
ENSOARG00020010020	439.41	2.33887	0.922279	2.53597	0.0112137	0.0984749	1.47924
ENSOARG00020018448	9.57989	6.80228	2.63403	2.58246	0.0098098	0.0984749	1.29366
ENSOARG00020016760	13.0622	5.28865	2.05487	2.57371	0.0100614	0.0985764	1.32291
ENSOARG00020019073	18.4134	4.79282	1.85669	2.58138	0.00984058	0.0985764	1.29366
ENSOARG00020017656	41.3449	2.48347	0.96251	2.5802	0.0098744	0.0988661	1.29294
ENSOARG00020019367	77.1664	3.22344	1.23561	2.60879	0.00908625	0.0989401	1.18761
ENSOARG00020000531	28.0254	4.26278	1.65294	2.57891	0.00991112	0.0989711	1.29366
ENSOARG00020017822	8.90772	-5.57984	2.16413	-2.57832	0.00992808	0.0990368	1.29366
ENSOARG00020008830	288.306	-2.31897	0.916464	-2.53035	0.0113949	0.0990943	1.47924
ENSOARG00020012190	330.15	-2.17272	0.858515	-2.53078	0.0113808	0.0990943	1.48023
ENSOARG00020022097	351.666	2.26517	0.895324	2.53	0.0114064	0.0990943	1.47924
ENSOARG00020023712	2987.32	-1.80777	0.674986	-2.67824	0.00740106	0.0990943	0.960466
ENSOARG00020004036	10.0987	4.39487	1.71257	2.56624	0.0102806	0.099764	1.32291
ENSOARG00020003468	37.3774	-2.93125	1.13908	-2.57335	0.0100719	0.099845	1.29366
ENSOARG00020024597	13.3464	3.70869	1.43678	2.58126	0.00984413	0.0998559	1.26295
ENSOARG00020022029	131.055	-3.39253	1.35022	-2.51258	0.0119853	0.100056	1.533
ENSOARG00020009554	1902.18	-2.1302	0.805579	-2.64431	0.0081857	0.100247	1.04392
ENSOARG00020025427	8.87016	-5.57846	2.1673	-2.57392	0.0100553	0.10041	1.27894
ENSOARG00020014227	8.97082	-5.59327	2.15768	-2.59226	0.00953483	0.100529	1.21006
ENSOARG00020012498	59.4879	-3.26996	1.25914	-2.59698	0.00940481	0.100824	1.18761
ENSOARG00020017426	16.7697	3.47055	1.35158	2.56777	0.0102356	0.100824	1.29366
ENSOARG00020001685	6769.76	1.79796	0.673606	2.66916	0.00760413	0.100854	0.958942
ENSOARG00020016171	1167.6	-2.11546	0.790871	-2.67485	0.00747619	0.101091	0.938671
ENSOARG00020018253	85.2387	-2.21663	0.85408	-2.59534	0.00944982	0.101091	1.18761
ENSOARG00020003787	610.571	-1.66162	0.660016	-2.51755	0.0118174	0.101189	1.47924
ENSOARG00020017653	548.766	-1.80865	0.721228	-2.50774	0.0121505	0.101189	1.52196
ENSOARG00020002186	11.3661	-4.9335	1.92149	-2.56755	0.0102421	0.101232	1.27894
ENSOARG00020004790	161.776	2.5768	1.02418	2.51596	0.0118709	0.101232	1.47924
ENSOARG00020008983	217.533	-2.71633	1.09254	-2.48625	0.0129099	0.101232	1.61016
ENSOARG00020016942	211.184	2.21052	0.889057	2.48636	0.0129056	0.101232	1.61016
ENSOARG00020006219	42.168	3.01775	1.16472	2.59096	0.00957076	0.101555	1.18761
ENSOARG00020005643	134.893	-2.69983	1.12127	-2.40784	0.0160472	0.101616	1.98802
ENSOARG00020001417	27.68	3.75974	1.47342	2.55172	0.0107193	0.101897	1.31903
ENSOARG00020003166	1798.48	-1.87056	0.702875	-2.6613	0.00778402	0.101897	0.960466
ENSOARG00020013117	471.117	2.81733	1.13571	2.48069	0.0131129	0.101897	1.61016
ENSOARG00020020554	3825.67	-2.53275	0.951867	-2.66082	0.00779507	0.101897	0.958479
ENSOARG00020020819	35.8859	4.11125	1.61084	2.55224	0.0107033	0.101897	1.31903
ENSOARG00020022579	176.038	-2.85512	1.14161	-2.50095	0.0123861	0.101897	1.52196
ENSOARG00020006877	82.1531	2.54215	1.00922	2.51892	0.0117716	0.101985	1.44216
ENSOARG00020014615	188.004	-2.52447	1.00992	-2.49968	0.0124305	0.101985	1.52196
ENSOARG00020017231	265.067	2.5125	1.00535	2.49912	0.0124502	0.102044	1.52196
ENSOARG00020024860	535.477	1.82519	0.727881	2.50754	0.0121575	0.10235	1.48023
ENSOARG00020003307	510.95	-1.85075	0.74788	-2.47466	0.0133365	0.102542	1.61016
ENSOARG00020004215	245.708	-2.62209	1.05968	-2.47442	0.0133453	0.102542	1.61016
ENSOARG00020011277	447.722	1.77453	0.711468	2.49418	0.0126249	0.102542	1.52196
ENSOARG00020014432	130.911	-2.27753	0.912819	-2.49505	0.0125941	0.102542	1.52196
ENSOARG00020023834	41.5217	-2.78786	1.09432	-2.54757	0.0108475	0.102542	1.30878
ENSOARG00020023933	24.0546	-3.84997	1.50371	-2.5603	0.010458	0.102542	1.26379
ENSOARG00020024632	131.295	-2.19622	0.876798	-2.50481	0.0122516	0.102542	1.48023
ENSOARG00020026295	220.268	2.53129	1.01086	2.50409	0.0122765	0.102542	1.48023
ENSOARG00020002902	15311.7	-1.83701	0.692357	-2.65327	0.00797165	0.102709	0.958479
ENSOARG00020009635	19.7486	3.47712	1.3597	2.55727	0.0105497	0.102744	1.26379
ENSOARG00020013424	208.046	-2.43574	0.973455	-2.50216	0.0123437	0.102744	1.47924
ENSOARG00020015674	28.6502	3.35137	1.27221	2.63428	0.00843161	0.102744	1.00898
ENSOARG00020018423	38.9554	2.4924	0.974849	2.5567	0.0105671	0.102744	1.26379
ENSOARG00020023681	134.929	-2.31314	0.928164	-2.49216	0.0126968	0.102744	1.52196
ENSOARG00020002962	58.5674	2.42687	0.942574	2.57472	0.010032	0.103386	1.18761
ENSOARG00020010931	52.3648	2.34731	0.939688	2.49797	0.0124908	0.103386	1.47924
ENSOARG00020016400	14.7184	-4.47964	1.76518	-2.53778	0.0111557	0.103386	1.32291
ENSOARG00020022838	32.3489	-3.20659	1.25556	-2.55392	0.0106517	0.103386	1.26379
ENSOARG00020009175	11.7224	-4.97796	1.95071	-2.55187	0.0107145	0.103641	1.26295
ENSOARG00020024501	68.2329	-3.04752	1.18434	-2.57319	0.0100767	0.103641	1.18761
ENSOARG00020011064	324.753	2.25429	0.903461	2.49517	0.0125896	0.103801	1.47924
ENSOARG00020012531	15.0748	6.04342	2.36941	2.5506	0.0107537	0.103801	1.26295
ENSOARG00020007429	10.6473	5.43423	2.13561	2.54459	0.0109408	0.104183	1.27894
ENSOARG00020014909	32.2145	3.45399	1.3156	2.62541	0.00865445	0.104276	1.00898
ENSOARG00020017181	102.911	-2.57112	1.0778	-2.38551	0.0170553	0.104276	1.98802
ENSOARG00020013210	28.2	-3.59663	1.41327	-2.54489	0.0109311	0.105028	1.26379
ENSOARG00020018452	93.9738	-8.0133	3.23609	-2.47622	0.013278	0.10507	1.533
ENSOARG00020010857	303.974	-2.09693	0.853271	-2.45751	0.0139902	0.105091	1.61016
ENSOARG00020018609	54.9551	2.49213	1.00151	2.48837	0.0128331	0.105091	1.47924
ENSOARG00020023015	26.6542	4.00907	1.52941	2.62132	0.00875911	0.105091	1.00898
ENSOARG00020002004	141.54	-3.52144	1.42331	-2.47413	0.0133562	0.105275	1.533
ENSOARG00020005814	26.735	-3.94242	1.55614	-2.53347	0.0112941	0.105387	1.29366
ENSOARG00020009967	463.827	-1.87302	0.754356	-2.48293	0.0130306	0.106161	1.48023
ENSOARG00020019060	8.99167	-5.59919	2.19308	-2.55312	0.0106762	0.106193	1.21006
ENSOARG00020021260	432.493	-2.0645	0.831717	-2.48222	0.0130567	0.106193	1.48023
ENSOARG00020004125	150.082	2.10338	0.852114	2.46842	0.0135711	0.106344	1.533
ENSOARG00020025198	519.446	-2.55168	1.02834	-2.48135	0.0130887	0.106344	1.47924
ENSOARG00020021251	12.1171	-5.01976	1.98264	-2.53186	0.011346	0.106465	1.27894
ENSOARG00020017513	23.3523	4.42859	1.69532	2.61225	0.00899484	0.106882	1.00898
ENSOARG00020001160	728.265	-2.4043	0.925116	-2.59892	0.00935183	0.107195	1.04392
ENSOARG00020006215	85.4438	2.34746	0.951636	2.46676	0.0136341	0.107195	1.52196
ENSOARG00020010829	12.3447	4.18964	1.65723	2.5281	0.0114682	0.107195	1.27894
ENSOARG00020021455	99.623	1.86835	0.789309	2.36707	0.0179295	0.10771	1.98802
ENSOARG00020005387	20.3371	4.64746	1.84299	2.52169	0.0116791	0.107716	1.29366
ENSOARG00020000163	16.1369	-3.92456	1.55417	-2.52519	0.0115636	0.107773	1.27894
ENSOARG00020020615	88.5906	2.43831	0.969275	2.5156	0.0118831	0.108122	1.30878
ENSOARG00020003371	44.356	-3.48349	1.36665	-2.54893	0.0108053	0.108188	1.18761
ENSOARG00020023352	72.0831	2.40354	0.943022	2.54877	0.0108104	0.108188	1.18761
ENSOARG00020024196	1222.22	-1.84263	0.700873	-2.62905	0.00856238	0.108312	0.938671
ENSOARG00020000319	1955.37	-1.84167	0.71042	-2.59237	0.00953185	0.108315	1.04392
ENSOARG00020004810	44.3791	3.03727	1.22533	2.47873	0.013185	0.108349	1.44216
ENSOARG00020016274	63.9016	-2.41987	0.950124	-2.5469	0.0108686	0.108353	1.18761
ENSOARG00020004419	36.6611	-2.89776	1.1486	-2.52287	0.01164	0.108645	1.26379
ENSOARG00020006353	203.461	-2.28586	0.931315	-2.45444	0.0141105	0.108645	1.533
ENSOARG00020020197	601.244	-2.1611	0.879652	-2.45676	0.0140195	0.108645	1.52196
ENSOARG00020020354	227.542	-1.76746	0.725082	-2.4376	0.0147851	0.108645	1.60702
ENSOARG00020001789	132.979	2.28633	0.93143	2.45465	0.0141023	0.109182	1.52196
ENSOARG00020010253	598.841	-2.40144	0.987272	-2.4324	0.014999	0.109873	1.60702
ENSOARG00020009200	10.8996	4.70502	1.87189	2.51351	0.0119538	0.109923	1.27894
ENSOARG00020022334	21.6378	-3.79443	1.51333	-2.50733	0.0121647	0.110546	1.29294
ENSOARG00020008879	120.154	2.36987	0.964834	2.45624	0.0140399	0.111337	1.48023
ENSOARG00020001668	50.3603	3.23451	1.27861	2.5297	0.0114159	0.111923	1.18761
ENSOARG00020003624	151.133	-2.55146	1.04041	-2.45236	0.0141923	0.111923	1.47924
ENSOARG00020008513	49.1936	3.42004	1.36997	2.49643	0.0125449	0.111923	1.30878
ENSOARG00020010180	62.1931	-3.06729	1.2126	-2.52952	0.011422	0.111923	1.18761
ENSOARG00020011339	1590.1	-2.01375	0.773465	-2.60354	0.00922657	0.111923	0.958479
ENSOARG00020013170	105.737	-2.65214	1.08213	-2.45085	0.014252	0.111923	1.47924
ENSOARG00020014859	332.941	-2.15933	0.891673	-2.42166	0.0154497	0.111923	1.60702
ENSOARG00020015361	31.7439	-3.5229	1.36102	-2.58842	0.00964161	0.111923	1.00898
ENSOARG00020021280	108.761	-2.41947	0.986367	-2.45292	0.0141703	0.111923	1.47924
ENSOARG00020022524	10.9706	-4.87552	1.95004	-2.50021	0.0124119	0.111923	1.29366
ENSOARG00020024798	116.246	3.17785	1.29504	2.45386	0.0141332	0.111923	1.48023
ENSOARG00020008304	39.3172	3.50455	1.35614	2.5842	0.00976056	0.112165	1.00898
ENSOARG00020024681	29.4186	3.49795	1.40044	2.49775	0.0124986	0.112165	1.29294
ENSOARG00020012156	309.991	1.81144	0.742943	2.43819	0.014761	0.11235	1.52196
ENSOARG00020008343	354.975	1.76629	0.721691	2.44743	0.014388	0.112492	1.48023
ENSOARG00020017829	110.537	2.04893	0.840827	2.4368	0.014818	0.112572	1.52196
ENSOARG00020023432	83.677	-2.59308	1.05994	-2.44644	0.0144275	0.112665	1.47924
ENSOARG00020018794	31.4485	2.99671	1.202	2.4931	0.0126633	0.112969	1.29366
ENSOARG00020006776	50.2788	3.36751	1.35349	2.48802	0.0128455	0.113165	1.30878
ENSOARG00020009458	104.802	1.99644	0.821711	2.42961	0.0151151	0.113577	1.533
ENSOARG00020025878	25.0389	3.14438	1.26312	2.48938	0.0127966	0.113838	1.29366
ENSOARG00020015183	196.674	-2.52221	1.03877	-2.42807	0.0151794	0.113847	1.533
ENSOARG00020008811	57.6867	3.35912	1.38254	2.42967	0.0151127	0.113851	1.52196
ENSOARG00020012973	336.1	-2.0627	0.856125	-2.40934	0.0159814	0.113851	1.61016
ENSOARG00020021604	23.0164	3.1451	1.22108	2.57566	0.0100048	0.113851	1.00898
ENSOARG00020005341	81.1886	-2.50292	1.0306	-2.42861	0.0151567	0.113971	1.52196
ENSOARG00020022560	3597.73	-1.76978	0.682803	-2.59193	0.00954394	0.113971	0.958942
ENSOARG00020019714	92.3951	-2.37339	0.978809	-2.42477	0.0153181	0.114249	1.533
ENSOARG00020010391	215.691	-1.77914	0.739925	-2.40448	0.0161953	0.114578	1.61016
ENSOARG00020013126	14.8608	4.7789	1.92056	2.48829	0.0128358	0.114578	1.27894
ENSOARG00020021785	460.466	1.76975	0.729709	2.42528	0.0152967	0.114578	1.52196
ENSOARG00020022922	577.859	-1.82473	0.752422	-2.42514	0.0153026	0.114578	1.52196
ENSOARG00020009523	479.605	-2.0361	0.846808	-2.40444	0.0161972	0.114604	1.60702
ENSOARG00020016072	9.31528	5.12038	2.05514	2.4915	0.0127205	0.114604	1.26295
ENSOARG00020007863	28.8319	2.83901	1.14397	2.48172	0.0130751	0.11488	1.29294
ENSOARG00020018785	260.145	-1.68794	0.702986	-2.4011	0.0163461	0.115219	1.61016
ENSOARG00020009143	109.731	-2.49421	1.02597	-2.43107	0.0150542	0.115294	1.47924
ENSOARG00020023650	112.314	-1.98941	0.821819	-2.42074	0.0154891	0.115294	1.52196
ENSOARG00020012625	368.965	2.13629	0.88286	2.41973	0.0155318	0.115426	1.52196
ENSOARG00020017335	130.822	-2.12379	0.878898	-2.41643	0.0156736	0.115426	1.533
ENSOARG00020020036	3143.91	-1.77134	0.685877	-2.58259	0.00980632	0.115426	0.958942
ENSOARG00020025325	626.687	2.01202	0.831628	2.41938	0.015547	0.115426	1.52196
ENSOARG00020022032	185.146	2.34925	0.967451	2.42828	0.0151704	0.115574	1.48023
ENSOARG00020022639	50.6465	2.33441	0.957909	2.43699	0.0148102	0.115703	1.44216
ENSOARG00020021157	81.5675	2.13621	0.864358	2.47145	0.0134568	0.115738	1.30878
ENSOARG00020006462	132.441	-2.17924	0.898099	-2.4265	0.0152453	0.115818	1.47924
ENSOARG00020018792	44.4955	2.93507	1.20962	2.42644	0.0152478	0.115818	1.47924
ENSOARG00020007572	98.0635	-2.19132	0.94589	-2.31668	0.0205213	0.11587	1.98802
ENSOARG00020017752	64.1413	2.38804	0.980787	2.43481	0.0148994	0.11587	1.44216
ENSOARG00020009378	35.8889	3.87309	1.51297	2.55993	0.0104693	0.116161	1.00898
ENSOARG00020023696	104.289	-2.30863	0.957409	-2.41133	0.0158945	0.116161	1.533
ENSOARG00020003507	77.5071	-2.49457	1.02591	-2.43156	0.0150339	0.116539	1.44216
ENSOARG00020025919	62.1208	2.85205	1.173	2.43142	0.0150399	0.116539	1.44216
ENSOARG00020005038	117.098	2.09202	0.8638	2.42188	0.0154406	0.116539	1.47924
ENSOARG00020016107	153.795	-1.90546	0.791284	-2.40807	0.0160372	0.116692	1.533
ENSOARG00020013601	492.812	-1.70552	0.70798	-2.409	0.0159963	0.117133	1.52196
ENSOARG00020003878	324.293	-2.2378	0.937315	-2.38746	0.0169651	0.117501	1.60702
ENSOARG00020023653	33.0897	3.65741	1.47814	2.47433	0.0133487	0.117501	1.26379
ENSOARG00020018433	17.1688	5.33238	2.15644	2.47278	0.0134068	0.117985	1.26295
ENSOARG00020021974	27.2115	3.6941	1.44802	2.55114	0.0107371	0.118167	1.00898
ENSOARG00020026307	55.6982	2.58844	1.03823	2.49313	0.0126624	0.11829	1.18761
ENSOARG00020009338	87.6645	2.4087	0.98015	2.45748	0.0139916	0.1185	1.30878
ENSOARG00020004826	5065.93	-2.05446	0.809783	-2.53705	0.0111792	0.118596	1.04392
ENSOARG00020002335	62.1335	2.61231	1.06362	2.45605	0.0140473	0.118757	1.30878
ENSOARG00020003282	107.798	3.46802	1.43908	2.40989	0.0159572	0.119003	1.48023
ENSOARG00020003892	91.0992	-2.79758	1.21633	-2.30001	0.0214474	0.119003	1.98802
ENSOARG00020006206	439.126	-1.83254	0.763835	-2.39914	0.0164337	0.119003	1.52196
ENSOARG00020011853	44.1514	2.71258	1.09011	2.48835	0.0128336	0.119003	1.18761
ENSOARG00020014774	2251.2	-1.78476	0.696323	-2.56312	0.0103735	0.119003	0.958479
ENSOARG00020022050	2957.35	-1.96596	0.766971	-2.56328	0.010369	0.119003	0.960466
ENSOARG00020024558	10.4353	6.37645	2.56991	2.4812	0.0130943	0.119003	1.21006
ENSOARG00020016412	16.9235	4.83306	1.96738	2.4566	0.0140258	0.119107	1.29366
ENSOARG00020011814	61.8859	2.18267	0.910613	2.39692	0.0165335	0.119129	1.52196
ENSOARG00020012323	47.3458	-3.29262	1.36247	-2.41665	0.015664	0.119129	1.44216
ENSOARG00020005932	958.774	-1.92841	0.753134	-2.56051	0.0104518	0.119197	0.960466
ENSOARG00020026475	299.664	-2.40213	0.998194	-2.40648	0.0161071	0.119197	1.47924
ENSOARG00020001582	101.74	-1.86252	0.774348	-2.40528	0.0161602	0.119484	1.47924
ENSOARG00020002136	49.8939	2.59999	1.04726	2.48266	0.0130404	0.11974	1.18761
ENSOARG00020004883	1695.05	-1.86836	0.730347	-2.55819	0.0105219	0.11974	0.958942
ENSOARG00020025429	2467.65	-2.67292	1.04201	-2.56515	0.0103131	0.11974	0.938671
ENSOARG00020025752	63.4675	2.26097	0.944839	2.39297	0.0167127	0.11974	1.52196
ENSOARG00020024317	27.9981	3.85433	1.56715	2.45946	0.0139146	0.119888	1.26379
ENSOARG00020016612	548.868	1.64849	0.695208	2.37122	0.0177297	0.119921	1.60702
ENSOARG00020020043	94.3661	-2.30611	1.00632	-2.29163	0.0219272	0.119921	1.98802
ENSOARG00020022306	70.3659	-2.49714	1.04531	-2.38891	0.0168985	0.12058	1.52196
ENSOARG00020005276	39.2557	2.55473	1.04372	2.44771	0.0143767	0.120583	1.29366
ENSOARG00020021827	84.6831	2.43656	0.983331	2.47787	0.0132171	0.120651	1.18761
ENSOARG00020012784	75.213	3.19242	1.33161	2.39741	0.0165114	0.120718	1.47924
ENSOARG00020014531	620.537	-2.35737	0.983473	-2.39699	0.0165306	0.120718	1.48023
ENSOARG00020016662	22.0323	5.52961	2.26082	2.44584	0.0144514	0.120718	1.29294
ENSOARG00020017051	316.554	-1.90769	0.796158	-2.39612	0.0165699	0.120718	1.48023
ENSOARG00020021114	78.1696	-3.07785	1.24304	-2.47607	0.0132837	0.120718	1.18761
ENSOARG00020022046	60.1916	-3.40502	1.41998	-2.39794	0.0164878	0.120718	1.47924
ENSOARG00020010154	66.8421	2.34837	0.976626	2.40457	0.0161913	0.120968	1.44216
ENSOARG00020000883	165.31	1.81371	0.761943	2.38038	0.0172948	0.12145	1.533
ENSOARG00020000280	30.9439	3.20809	1.31413	2.44123	0.0146373	0.121699	1.29366
ENSOARG00020012572	13.5586	5.02017	2.06365	2.43266	0.0149883	0.121756	1.32291
ENSOARG00020011887	39.767	3.66691	1.49804	2.4478	0.0143731	0.121902	1.26379
ENSOARG00020015985	15.7035	-4.3448	1.78088	-2.4397	0.0146996	0.121902	1.29366
ENSOARG00020025330	15.1135	4.34999	1.77676	2.44826	0.0143546	0.121902	1.26295
ENSOARG00020014365	1315.41	-1.65769	0.651412	-2.54477	0.010935	0.122119	0.958942
ENSOARG00020019527	180.171	2.06707	0.865423	2.38851	0.0169167	0.122365	1.47924
ENSOARG00020015496	85.0754	2.14369	0.868852	2.46727	0.0136146	0.122557	1.18761
ENSOARG00020003289	27.081	3.08947	1.2639	2.44439	0.0145097	0.122635	1.26379
ENSOARG00020022904	50.9406	2.15107	0.884767	2.43123	0.0150478	0.122704	1.30878
ENSOARG00020002486	133.064	-2.07387	0.873585	-2.37398	0.0175975	0.12287	1.52196
ENSOARG00020003788	469.908	1.92079	0.809107	2.37396	0.0175984	0.12287	1.52196
ENSOARG00020009706	83.8094	2.41757	1.01829	2.37415	0.0175893	0.12287	1.52196
ENSOARG00020010828	53.7161	2.60706	1.05792	2.46433	0.013727	0.12287	1.18761
ENSOARG00020015451	257.762	2.10045	0.88098	2.38422	0.0171154	0.12287	1.48023
ENSOARG00020025753	59.457	-3.28927	1.3356	-2.46276	0.0137871	0.123254	1.18761
ENSOARG00020004029	74.4582	2.50014	1.05453	2.37084	0.0177476	0.123699	1.52196
ENSOARG00020011455	94.6063	2.10178	0.882889	2.38057	0.0172856	0.123769	1.48023
ENSOARG00020010585	22.1819	-3.44646	1.41886	-2.42904	0.0151388	0.123993	1.29294
ENSOARG00020011331	3275.74	-2.18543	0.862116	-2.53496	0.0112459	0.12412	0.958479
ENSOARG00020014930	192.516	1.88377	0.79189	2.37883	0.0173676	0.12412	1.47924
ENSOARG00020017006	559.328	-2.68029	1.14278	-2.34541	0.0190061	0.124678	1.61016
ENSOARG00020021249	5381.72	-1.85484	0.732446	-2.53239	0.0113287	0.124708	0.958479
ENSOARG00020021620	318.751	-2.47615	1.05607	-2.34468	0.0190432	0.124708	1.61016
ENSOARG00020003710	470.46	1.82941	0.770292	2.37495	0.0175512	0.125003	1.47924
ENSOARG00020011291	149.037	1.93244	0.813904	2.37428	0.0175833	0.125041	1.48023
ENSOARG00020001019	339.698	2.01719	0.86168	2.341	0.0192323	0.125404	1.60702
ENSOARG00020012178	72.8551	2.85252	1.20748	2.36237	0.0181584	0.125404	1.52196
ENSOARG00020015164	83.6259	2.26899	0.961019	2.36103	0.0182242	0.125404	1.52196
ENSOARG00020015244	372.505	1.90427	0.806402	2.36144	0.0182039	0.125404	1.52196
ENSOARG00020019227	142.201	1.89768	0.799845	2.37256	0.0176655	0.125404	1.48023
ENSOARG00020019423	23.8227	3.34648	1.38216	2.4212	0.0154692	0.125404	1.29366
ENSOARG00020025536	573.548	-2.15247	0.907856	-2.37094	0.0177431	0.125428	1.48023
ENSOARG00020012558	15.0038	4.30574	1.77329	2.42811	0.0151779	0.125647	1.26295
ENSOARG00020022328	786.276	-1.75999	0.696841	-2.52567	0.0115478	0.125856	0.958479
ENSOARG00020000990	15.7639	-4.42649	1.82744	-2.42224	0.0154253	0.125859	1.27894
ENSOARG00020005225	71.3082	-3.43524	1.42382	-2.41269	0.0158353	0.125859	1.30878
ENSOARG00020015883	793.103	-1.67359	0.663016	-2.52421	0.0115957	0.125859	0.960466
ENSOARG00020022045	107.517	2.73461	1.15485	2.36793	0.0178878	0.125859	1.48023
ENSOARG00020024928	33.3724	-3.48005	1.43969	-2.41722	0.0156395	0.125859	1.29366
ENSOARG00020006002	380.763	-1.99645	0.855	-2.33503	0.0195421	0.126142	1.61016
ENSOARG00020015503	153.172	2.12954	0.944684	2.25424	0.0241814	0.126315	1.98802
ENSOARG00020008539	771.928	-2.15643	0.855102	-2.52184	0.0116742	0.126318	0.958942
ENSOARG00020002883	94.4911	2.38238	1.01255	2.35284	0.0186305	0.126618	1.52196
ENSOARG00020005477	10.8911	-5.87407	2.43388	-2.41346	0.0158018	0.126618	1.29366
ENSOARG00020005966	18.6381	4.20794	1.74407	2.41272	0.015834	0.126618	1.29366
ENSOARG00020013376	10.2089	-4.77086	1.97034	-2.42133	0.0154637	0.126618	1.26295
ENSOARG00020007578	122.355	-2.33651	0.989086	-2.36229	0.0181623	0.126673	1.48023
ENSOARG00020014314	759.939	-1.70482	0.676838	-2.51881	0.0117753	0.126673	0.960466
ENSOARG00020019971	466.343	1.77928	0.753554	2.36118	0.0182168	0.126946	1.48023
ENSOARG00020012692	12.9427	4.79707	1.97095	2.43389	0.0149376	0.12723	1.21006
ENSOARG00020021753	269.699	1.81288	0.7784	2.32898	0.0198601	0.127266	1.60702
ENSOARG00020014831	179.71	-1.67945	0.747228	-2.24758	0.0246031	0.127339	1.98802
ENSOARG00020023963	107.125	-2.45285	1.03995	-2.35863	0.0183427	0.127483	1.47924
ENSOARG00020003821	196.625	-1.87436	0.835151	-2.24434	0.0248106	0.128199	1.98802
ENSOARG00020002750	26.3702	3.93003	1.63961	2.39692	0.0165335	0.128434	1.31903
ENSOARG00020003505	3455.34	-1.96883	0.783806	-2.51188	0.0120089	0.128434	0.958479
ENSOARG00020011374	84.7956	1.97275	0.834588	2.36374	0.0180914	0.128434	1.44216
ENSOARG00020023178	20.39	5.3871	2.24037	2.40456	0.0161921	0.128434	1.29366
ENSOARG00020022938	30.8499	-3.43588	1.42979	-2.40307	0.016258	0.128561	1.29366
ENSOARG00020010340	510.098	1.9435	0.825974	2.35298	0.0186236	0.128598	1.48023
ENSOARG00020021065	14.8148	-4.25526	1.77746	-2.39401	0.0166653	0.128654	1.32291
ENSOARG00020021713	17.1252	4.33174	1.79729	2.41014	0.0159462	0.128841	1.26295
ENSOARG00020001111	145.002	-3.25569	1.39267	-2.33773	0.0194012	0.12893	1.533
ENSOARG00020016033	63.3647	2.01845	0.855042	2.36065	0.0182431	0.12893	1.44216
ENSOARG00020019779	358.518	-1.671	0.721002	-2.31761	0.0204705	0.129318	1.61016
ENSOARG00020022429	1930.34	1.93163	0.770643	2.50651	0.0121928	0.129318	0.958942
ENSOARG00020015967	655.229	-1.53697	0.654452	-2.34849	0.0188499	0.129497	1.47924
ENSOARG00020010810	375.994	-2.00775	0.858937	-2.33748	0.019414	0.129523	1.52196
ENSOARG00020013014	195.698	1.81262	0.772214	2.3473	0.0189102	0.129598	1.48023
ENSOARG00020025662	308.589	-1.94497	0.828605	-2.34728	0.0189111	0.129598	1.47924
ENSOARG00020003888	22067.1	1.73683	0.693624	2.504	0.0122798	0.129768	0.958479
ENSOARG00020008770	56.869	3.47181	1.43064	2.42675	0.0152346	0.129826	1.18761
ENSOARG00020021679	574.549	-2.2091	0.942412	-2.3441	0.0190732	0.1303	1.48023
ENSOARG00020003631	12.0836	-5.01494	2.10311	-2.38454	0.0171007	0.13061	1.32291
ENSOARG00020011357	211.21	2.03962	0.870719	2.34245	0.0191577	0.130643	1.47924
ENSOARG00020024390	54.4921	2.27877	0.940318	2.42341	0.0153757	0.130643	1.18761
ENSOARG00020011977	46.4516	2.63075	1.11943	2.35007	0.0187699	0.131075	1.44216
ENSOARG00020012186	28.3161	3.20852	1.29363	2.48024	0.0131293	0.131075	1.00898
ENSOARG00020013904	1409.01	-1.70204	0.689767	-2.46755	0.0136039	0.131135	1.04392
ENSOARG00020004270	21.7721	3.78454	1.58412	2.38905	0.0168919	0.131288	1.29366
ENSOARG00020002961	34.8292	3.78722	1.58562	2.38847	0.0169185	0.131387	1.29366
ENSOARG00020009078	416.621	-1.73043	0.75035	-2.30616	0.0211015	0.131554	1.61016
ENSOARG00020004484	67.4895	-2.56748	1.09472	-2.34534	0.0190099	0.132104	1.44216
ENSOARG00020025423	13.8155	-4.27174	1.77227	-2.41032	0.0159385	0.132104	1.21006
ENSOARG00020002756	3212.07	-1.97179	0.791249	-2.49199	0.0127029	0.132715	0.958479
ENSOARG00020008562	136.825	-2.04793	0.881744	-2.32259	0.0202009	0.132805	1.52196
ENSOARG00020019174	120.851	-2.23526	1.00697	-2.2198	0.0264326	0.132927	1.98802
ENSOARG00020013411	1590.76	1.72122	0.699947	2.45907	0.0139298	0.133298	1.04392
ENSOARG00020007274	424.563	-1.97862	0.860821	-2.29853	0.0215318	0.133476	1.61016
ENSOARG00020000293	26.6886	3.37313	1.41264	2.38782	0.0169487	0.133753	1.26379
ENSOARG00020005943	150.325	1.90065	0.857946	2.21534	0.0267365	0.133973	1.98802
ENSOARG00020014787	35.3308	2.62204	1.10252	2.37822	0.0173964	0.133973	1.29294
ENSOARG00020012487	621.42	-1.85249	0.796135	-2.32685	0.0199732	0.134337	1.47924
ENSOARG00020000807	30.3962	-2.95446	1.19774	-2.46669	0.0136367	0.134358	1.00898
ENSOARG00020026156	20.8678	4.4352	1.86028	2.38416	0.017118	0.134545	1.26379
ENSOARG00020003750	53.9787	2.12072	0.908367	2.33466	0.0195614	0.134625	1.44216
ENSOARG00020013786	192.335	-2.08458	0.902057	-2.31092	0.0208371	0.134799	1.533
ENSOARG00020010927	22.0463	4.01559	1.68598	2.38175	0.0172306	0.135103	1.26379
ENSOARG00020000271	352.8	2.00432	0.866852	2.31218	0.0207676	0.135106	1.52196
ENSOARG00020011510	3117.78	-1.62337	0.654363	-2.48083	0.0131076	0.135296	0.958479
ENSOARG00020008508	55.4454	2.17163	0.939866	2.31058	0.0208562	0.135418	1.52196
ENSOARG00020013536	8885.58	-1.74512	0.703904	-2.4792	0.0131677	0.135418	0.960466
ENSOARG00020022928	181.303	1.87723	0.850412	2.20743	0.027284	0.135453	1.98802
ENSOARG00020008377	434.276	1.66818	0.729485	2.28679	0.0222081	0.136018	1.61016
ENSOARG00020011635	23.104	-3.21381	1.35215	-2.37682	0.0174628	0.13605	1.26379
ENSOARG00020020928	50.5973	2.16026	0.927999	2.32787	0.0199189	0.13605	1.44216
ENSOARG00020007296	879.922	2.22301	0.897874	2.47586	0.0132917	0.136148	0.960466
ENSOARG00020004782	64.256	2.18139	0.909476	2.39852	0.0164617	0.13626	1.18761
ENSOARG00020002329	97.4511	2.03389	0.877967	2.31658	0.0205264	0.13629	1.47924
ENSOARG00020005133	308.412	-2.03856	0.880247	-2.3159	0.0205639	0.13629	1.47924
ENSOARG00020006372	313.987	1.96773	0.849624	2.316	0.0205581	0.13629	1.47924
ENSOARG00020015923	185.299	2.07647	0.896784	2.31546	0.0205878	0.13629	1.48023
ENSOARG00020023229	1574.66	-2.24528	0.907361	-2.47451	0.0133418	0.136292	0.958479
ENSOARG00020002115	22.7278	3.19375	1.30055	2.45568	0.0140617	0.136348	1.00898
ENSOARG00020014272	17.6947	4.04294	1.71615	2.35583	0.0184816	0.136571	1.32291
ENSOARG00020004361	170.679	-1.9974	0.868722	-2.29923	0.0214916	0.136725	1.533
ENSOARG00020006013	60.3283	3.02136	1.30618	2.31312	0.020716	0.136725	1.47924
ENSOARG00020012194	197.73	-2.1522	0.936032	-2.29928	0.0214888	0.136725	1.533
ENSOARG00020020309	15.5995	5.03919	2.12592	2.37036	0.0177709	0.137119	1.26295
ENSOARG00020002712	80.1329	1.95573	0.843342	2.31902	0.020394	0.137587	1.44216
ENSOARG00020007764	25.1573	-3.79952	1.55049	-2.45053	0.0142647	0.137587	1.00898
ENSOARG00020008956	402.946	1.83878	0.796368	2.30896	0.0209459	0.13766	1.47924
ENSOARG00020000903	17.186	-3.60772	1.52828	-2.36065	0.0182432	0.138488	1.27894
ENSOARG00020005535	307.049	1.97828	0.858041	2.30557	0.0211345	0.138488	1.48023
ENSOARG00020012176	10.9174	5.9796	2.53344	2.36027	0.0182617	0.138488	1.27894
ENSOARG00020003495	75.5758	2.37141	1.02883	2.30496	0.0211689	0.138636	1.47924
ENSOARG00020023297	197.826	-1.71728	0.783836	-2.19087	0.0284614	0.138636	1.98802
ENSOARG00020015697	31.0548	3.567	1.51529	2.35401	0.0185721	0.138804	1.29366
ENSOARG00020016382	40.8708	2.3609	1.00284	2.35422	0.0185615	0.138804	1.29366
ENSOARG00020011955	11.8597	5.31367	2.2581	2.35316	0.0186146	0.139012	1.29366
ENSOARG00020001444	226.521	-2.4932	1.09873	-2.26916	0.0232584	0.139347	1.61016
ENSOARG00020014173	3980.29	1.88008	0.764201	2.4602	0.0138861	0.139347	0.960466
ENSOARG00020015214	112.167	-2.33944	1.02264	-2.28764	0.0221585	0.139347	1.533
ENSOARG00020009469	127.957	-2.36461	1.02844	-2.29922	0.0214926	0.13993	1.47924
ENSOARG00020007076	130.874	1.80471	0.785735	2.29684	0.0216278	0.140494	1.47924
ENSOARG00020011072	58.3474	-2.46597	1.07879	-2.28587	0.0222621	0.140494	1.52196
ENSOARG00020015069	170.832	2.41815	1.0591	2.28322	0.0224174	0.140494	1.533
ENSOARG00020025561	308.83	-1.69609	0.749092	-2.26419	0.0235625	0.140494	1.61016
ENSOARG00020006548	659.82	-1.96671	0.869023	-2.26313	0.0236278	0.14094	1.60702
ENSOARG00020011945	79.8129	-2.43593	1.06152	-2.29475	0.0217472	0.14094	1.47924
ENSOARG00020026147	909.11	-1.95118	0.805297	-2.42293	0.0153957	0.141262	1.04392
ENSOARG00020018357	157.281	2.04121	0.890388	2.2925	0.0218768	0.141453	1.48023
ENSOARG00020021798	623.363	-1.8581	0.81062	-2.2922	0.021894	0.141549	1.47924
ENSOARG00020005621	152.3	-2.207	0.963282	-2.29112	0.0219562	0.141746	1.48023
ENSOARG00020002238	20.8502	3.22202	1.37697	2.33994	0.019287	0.142251	1.29366
ENSOARG00020008565	419.613	-2.00266	0.874827	-2.2892	0.0220676	0.142251	1.48023
ENSOARG00020011599	53.6856	2.33885	1.02726	2.27678	0.0227991	0.14282	1.52196
ENSOARG00020011884	92.6806	-1.87415	0.823301	-2.27638	0.0228232	0.142861	1.52196
ENSOARG00020005553	34.9222	-2.90314	1.24639	-2.32923	0.0198467	0.143208	1.31903
ENSOARG00020019967	1236.17	-1.73729	0.710282	-2.44591	0.0144485	0.143208	0.958942
ENSOARG00020025649	137.653	2.23879	0.979663	2.28526	0.0222974	0.143208	1.48023
ENSOARG00020002571	16.8231	4.06392	1.73414	2.34349	0.0191045	0.143445	1.26295
ENSOARG00020013290	279.62	-2.26014	1.00353	-2.2522	0.0243094	0.143445	1.60702
ENSOARG00020024096	23.4264	9.10103	3.91062	2.32726	0.0199515	0.143445	1.31903
ENSOARG00020013636	121.82	-2.46163	1.08452	-2.26979	0.0232201	0.143523	1.533
ENSOARG00020024525	19.5333	-3.88971	1.67225	-2.32603	0.0200169	0.143684	1.31903
ENSOARG00020010040	190.803	1.81429	0.795056	2.28196	0.0224918	0.143756	1.48023
ENSOARG00020017860	16.2722	4.12916	1.7708	2.3318	0.0197111	0.144042	1.29366
ENSOARG00020003364	122.397	-2.59068	1.14273	-2.2671	0.0233839	0.144093	1.533
ENSOARG00020026268	443.454	-1.62019	0.710839	-2.27926	0.0226517	0.144445	1.48023
ENSOARG00020006717	157.334	-2.38854	1.05487	-2.2643	0.0235555	0.144707	1.533
ENSOARG00020019296	9.01209	6.1694	2.64442	2.33299	0.0196489	0.144707	1.27894
ENSOARG00020020150	10.0726	-4.7539	2.01946	-2.35404	0.0185706	0.144707	1.21006
ENSOARG00020004359	319.742	-2.23734	0.996702	-2.24475	0.0247844	0.145132	1.60702
ENSOARG00020014779	18.4107	-3.38991	1.45171	-2.33512	0.0195374	0.145464	1.26295
ENSOARG00020018837	229.084	2.096	0.934456	2.24302	0.0248955	0.145561	1.60702
ENSOARG00020022726	43.7229	2.30602	1.01428	2.27355	0.022993	0.145939	1.47924
ENSOARG00020005775	121.527	-2.71492	1.19467	-2.27252	0.0230549	0.146027	1.47924
ENSOARG00020005834	18.9178	3.36431	1.4479	2.32358	0.0201479	0.146027	1.29366
ENSOARG00020015772	85.8072	-2.35058	1.03438	-2.27245	0.0230594	0.146027	1.47924
ENSOARG00020000529	174.122	-2.24931	0.995301	-2.25993	0.0238253	0.146309	1.52196
ENSOARG00020014360	22.8006	-3.69217	1.52952	-2.41394	0.0157809	0.146309	1.00898
ENSOARG00020024108	391.967	-1.63461	0.730045	-2.23905	0.0251527	0.146309	1.60702
ENSOARG00020007993	4110.33	-1.93551	0.793412	-2.43947	0.0147087	0.146342	0.938671
ENSOARG00020002574	231.235	-2.0644	0.914125	-2.25834	0.0239245	0.146696	1.52196
ENSOARG00020001193	193.954	-1.92354	0.852667	-2.25591	0.0240762	0.147403	1.52196
ENSOARG00020010758	144.51	3.15344	1.39778	2.25604	0.0240683	0.147403	1.52196
ENSOARG00020014752	32.7555	4.00628	1.66347	2.40839	0.016023	0.147861	1.00898
ENSOARG00020001441	24.6852	3.61634	1.56165	2.31572	0.0205735	0.147963	1.29366
ENSOARG00020020380	1541.37	-1.74143	0.717974	-2.42548	0.0152883	0.148219	0.958942
ENSOARG00020005878	934.503	-1.85933	0.767303	-2.4232	0.0153846	0.148621	0.960466
ENSOARG00020014686	248.518	2.00902	0.892423	2.25119	0.0243734	0.148621	1.52196
ENSOARG00020024664	80.84	-3.16548	1.3499	-2.34498	0.0190282	0.148621	1.18761
ENSOARG00020007423	60.836	-3.53885	1.57264	-2.25026	0.0244324	0.148686	1.52196
ENSOARG00020013087	11.5861	-4.9633	2.15434	-2.30386	0.0212306	0.148686	1.32291
ENSOARG00020023183	51.3429	-2.6474	1.17677	-2.24972	0.0244667	0.148783	1.52196
ENSOARG00020016757	17.2267	-3.64936	1.57327	-2.31961	0.0203621	0.149104	1.26295
ENSOARG00020003988	287.54	-1.75088	0.78633	-2.22665	0.0259705	0.149232	1.60702
ENSOARG00020012389	826.741	1.69309	0.697166	2.42854	0.0151599	0.149232	0.938671
ENSOARG00020002628	108.685	-2.28844	1.01963	-2.24438	0.0248077	0.149322	1.533
ENSOARG00020013699	299.81	2.02321	0.909783	2.22384	0.0261591	0.149756	1.60702
ENSOARG00020022277	146.386	-1.61743	0.755573	-2.14067	0.032301	0.149756	1.98802
ENSOARG00020022821	296.705	-2.13116	0.944688	-2.25595	0.024074	0.149756	1.48023
ENSOARG00020024844	15.1601	4.0904	1.7539	2.33216	0.019692	0.149756	1.21006
ENSOARG00020026093	12.8485	5.02079	2.18558	2.29724	0.0216053	0.150136	1.32291
ENSOARG00020023313	21.213	-3.67957	1.60124	-2.29795	0.0215645	0.150182	1.31903
ENSOARG00020000274	108.13	-2.00976	0.941086	-2.13558	0.0327141	0.150245	1.98802
ENSOARG00020001028	41.5854	2.98055	1.27672	2.33453	0.0195681	0.150245	1.18761
ENSOARG00020001060	7774.46	1.8269	0.757305	2.41237	0.0158493	0.150245	0.960466
ENSOARG00020002270	53.0865	2.41284	1.07597	2.24248	0.0249306	0.150245	1.52196
ENSOARG00020003833	42.6641	-2.20459	0.983326	-2.24197	0.0249632	0.150245	1.52196
ENSOARG00020004589	184.172	1.95027	0.866186	2.25156	0.0243501	0.150245	1.47924
ENSOARG00020013490	115.69	-2.71553	1.21373	-2.23733	0.0252647	0.150245	1.533
ENSOARG00020014210	144.108	2.34799	1.04905	2.23821	0.0252072	0.150245	1.533
ENSOARG00020017408	18.4647	-4.57032	1.96385	-2.32722	0.0199535	0.150245	1.21006
ENSOARG00020022947	109.186	-1.81008	0.808431	-2.23901	0.0251556	0.150245	1.533
ENSOARG00020023667	240.674	1.66884	0.741053	2.25198	0.0243235	0.150245	1.47924
ENSOARG00020026259	249.65	-2.24192	0.995947	-2.25104	0.0243827	0.150245	1.48023
ENSOARG00020008401	216.937	-1.92042	0.866418	-2.21651	0.0266568	0.150512	1.61016
ENSOARG00020013562	135.111	-2.21864	0.991065	-2.23865	0.0251789	0.150512	1.52196
ENSOARG00020002360	316.131	1.92702	0.856902	2.24882	0.0245239	0.150613	1.47924
ENSOARG00020019185	124.268	1.66362	0.780384	2.13179	0.033024	0.150799	1.98802
ENSOARG00020005564	22.3964	3.37062	1.46127	2.30664	0.021075	0.150845	1.26379
ENSOARG00020006598	10.5925	5.42803	2.33668	2.32297	0.020181	0.150845	1.21006
ENSOARG00020017275	35.6988	-2.6574	1.15607	-2.29866	0.0215245	0.150845	1.29294
ENSOARG00020018340	219.226	1.67675	0.746323	2.24669	0.0246601	0.150845	1.47924
ENSOARG00020023492	51.7464	3.58611	1.53849	2.33093	0.0197572	0.150845	1.18761
ENSOARG00020019322	10261.3	-1.86847	0.775785	-2.40849	0.0160188	0.151051	0.958479
ENSOARG00020008044	1019.83	-2.09751	0.868259	-2.41577	0.0157019	0.151077	0.938671
ENSOARG00020006337	32.0487	2.90594	1.26551	2.29626	0.0216611	0.151185	1.29294
ENSOARG00020020542	13.4664	5.01124	2.17867	2.30014	0.0214405	0.151185	1.27894
ENSOARG00020008476	10.0185	-5.75484	2.48005	-2.32045	0.0203165	0.151193	1.21006
ENSOARG00020023502	147.905	1.76545	0.790631	2.23297	0.0255512	0.151193	1.52196
ENSOARG00020003944	42.3301	-2.8276	1.26649	-2.23262	0.025574	0.151205	1.52196
ENSOARG00020016478	134.987	1.68673	0.751934	2.24319	0.0248844	0.151267	1.47924
ENSOARG00020024903	212.695	2.20567	0.998175	2.2097	0.0271257	0.15167	1.60702
ENSOARG00020014768	248.532	-1.73704	0.775275	-2.24054	0.0250556	0.152086	1.47924
ENSOARG00020012172	132.192	-2.27715	1.01681	-2.23949	0.0251238	0.152176	1.48023
ENSOARG00020017862	1970.49	-1.95546	0.824532	-2.3716	0.017711	0.152176	1.04392
ENSOARG00020002129	130.701	-2.12397	0.949377	-2.23722	0.025272	0.152852	1.48023
ENSOARG00020004474	70.09	2.01031	0.902833	2.22667	0.0259697	0.152852	1.52196
ENSOARG00020003569	371.664	2.31004	1.03259	2.23713	0.0252777	0.152878	1.47924
ENSOARG00020023672	266.946	2.13764	0.955766	2.23657	0.0253146	0.152887	1.48023
ENSOARG00020016668	669.973	2.08379	0.932146	2.23548	0.0253859	0.153199	1.47924
ENSOARG00020025337	72.6285	2.72429	1.19353	2.28254	0.0224574	0.153199	1.30878
ENSOARG00020000267	111.422	2.04715	0.921748	2.22095	0.0263544	0.153356	1.533
ENSOARG00020019391	632.848	-1.78602	0.811327	-2.20135	0.027711	0.153411	1.61016
ENSOARG00020002308	181.769	2.14728	0.961481	2.23331	0.0255287	0.153496	1.47924
ENSOARG00020007748	236.988	2.09612	0.938354	2.23382	0.0254947	0.153496	1.47924
ENSOARG00020012822	1001.01	-1.72613	0.720391	-2.3961	0.0165706	0.153496	0.958942
ENSOARG00020023197	65.7478	2.27236	1.01291	2.24341	0.0248706	0.153496	1.44216
ENSOARG00020024514	21.4141	3.938	1.65646	2.37736	0.0174371	0.153496	1.00898
ENSOARG00020000902	103.876	-2.45284	1.10562	-2.21852	0.0265196	0.15354	1.533
ENSOARG00020017387	1544.52	-1.66577	0.695532	-2.39495	0.0166225	0.153739	0.958942
ENSOARG00020023927	26.1725	2.84524	1.24161	2.29157	0.0219302	0.153794	1.26379
ENSOARG00020025871	12436.3	2.19549	0.929176	2.36283	0.018136	0.153863	1.04392
ENSOARG00020002718	66.3753	-2.11029	0.926699	-2.27722	0.0227733	0.153995	1.30878
ENSOARG00020002827	153.493	1.64273	0.736846	2.22941	0.0257869	0.15412	1.47924
ENSOARG00020022056	21.7022	3.17302	1.39573	2.27338	0.0230033	0.15412	1.31903
ENSOARG00020025068	119.635	-1.93622	0.868917	-2.22831	0.0258597	0.154383	1.47924
ENSOARG00020023268	584.349	1.7806	0.799297	2.22771	0.0259	0.154409	1.48023
ENSOARG00020003359	9.08596	5.5833	2.42273	2.30454	0.0211922	0.154441	1.21006
ENSOARG00020006781	9.53791	-4.66721	2.02584	-2.30384	0.0212319	0.154619	1.21006
ENSOARG00020010821	693.056	-1.95008	0.826716	-2.35883	0.0183325	0.154641	1.04392
ENSOARG00020003503	93.9851	-2.29576	1.03795	-2.21181	0.0269795	0.154676	1.533
ENSOARG00020005712	121.603	2.87046	1.2896	2.22586	0.0260234	0.154676	1.47924
ENSOARG00020023500	69.7015	1.92382	0.860585	2.23548	0.0253861	0.154676	1.44216
ENSOARG00020023897	941.154	-2.18904	0.913439	-2.39648	0.0165535	0.154849	0.938671
ENSOARG00020004495	142.481	-2.95686	1.32934	-2.2243	0.0261284	0.15494	1.47924
ENSOARG00020014897	127.044	-1.7766	0.843342	-2.10662	0.0351502	0.15494	1.98802
ENSOARG00020024411	211.921	-2.16492	0.973609	-2.2236	0.0261751	0.15494	1.48023
ENSOARG00020023951	55.991	-3.13489	1.35849	-2.30763	0.0210197	0.154972	1.18761
ENSOARG00020011224	139.457	-1.75659	0.794247	-2.21164	0.0269914	0.155172	1.52196
ENSOARG00020024053	28.7841	3.25915	1.43342	2.27369	0.0229843	0.155344	1.29366
ENSOARG00020026309	101.357	-1.9789	0.890699	-2.22173	0.0263013	0.155351	1.47924
ENSOARG00020011564	8.9128	4.10509	1.80702	2.27174	0.0231022	0.155809	1.29366
ENSOARG00020025916	328.295	-2.12883	0.958913	-2.22004	0.0264158	0.155809	1.47924
ENSOARG00020017876	300.642	-1.91357	0.86245	-2.21876	0.0265034	0.155993	1.48023
ENSOARG00020023816	88.7916	-2.53567	1.20674	-2.10125	0.0356192	0.155993	1.98802
ENSOARG00020023884	24.5872	2.90783	1.2805	2.27085	0.023156	0.155993	1.29294
ENSOARG00020002002	102.085	1.82315	0.867949	2.10053	0.0356825	0.156049	1.98802
ENSOARG00020011756	305.691	-1.86867	0.842405	-2.21825	0.0265378	0.156049	1.47924
ENSOARG00020020925	100.568	1.95869	0.932997	2.09936	0.0357855	0.15639	1.98802
ENSOARG00020015858	22.6467	-3.49738	1.54192	-2.2682	0.0233173	0.156485	1.29366
ENSOARG00020009153	62.3579	-2.62845	1.18097	-2.22567	0.0260362	0.156611	1.44216
ENSOARG00020010718	33.6439	3.28112	1.44698	2.26756	0.023356	0.156611	1.29294
ENSOARG00020001491	11.8883	4.39092	1.94516	2.25736	0.0239855	0.156848	1.32291
ENSOARG00020005456	37.7818	3.1395	1.39031	2.25814	0.0239372	0.156848	1.31903
ENSOARG00020011346	516.944	-1.46703	0.672609	-2.18111	0.0291754	0.156848	1.60702
ENSOARG00020015936	9.89723	4.63889	2.03852	2.27562	0.022869	0.156848	1.26295
ENSOARG00020024579	432.309	-2.14043	0.9667	-2.21416	0.0268176	0.156848	1.47924
ENSOARG00020005480	165.365	1.96805	0.890162	2.21089	0.0270437	0.157509	1.48023
ENSOARG00020010467	41.2559	-3.13715	1.33097	-2.35703	0.0184218	0.157509	1.00898
ENSOARG00020026247	75.0598	-2.25602	0.982655	-2.29585	0.0216847	0.157509	1.18761
ENSOARG00020025319	11.6344	-4.97173	2.19758	-2.26236	0.0236749	0.157665	1.29366
ENSOARG00020007219	80.2681	-2.80901	1.26614	-2.21856	0.0265166	0.158279	1.44216
ENSOARG00020008311	378.994	-1.61715	0.732458	-2.20784	0.0272554	0.158279	1.47924
ENSOARG00020010414	15.0065	3.63681	1.60932	2.25984	0.0238313	0.158279	1.29366
ENSOARG00020011626	574.665	2.26281	1.02513	2.20735	0.0272898	0.158279	1.48023
ENSOARG00020025026	125.751	2.15203	0.980828	2.1941	0.0282283	0.158279	1.533
ENSOARG00020005525	22.0817	3.70618	1.64619	2.25137	0.0243622	0.158458	1.31903
ENSOARG00020008650	122.438	2.06858	0.937865	2.20562	0.0274104	0.158561	1.48023
ENSOARG00020015963	531.275	-1.82533	0.827506	-2.20583	0.0273961	0.158561	1.47924
ENSOARG00020020438	1019.58	1.80317	0.760544	2.3709	0.017745	0.158561	0.958942
ENSOARG00020022357	283.644	1.91598	0.882132	2.17199	0.0298564	0.15864	1.61016
ENSOARG00020008554	151.492	-2.28311	1.03565	-2.20452	0.0274879	0.158656	1.47924
ENSOARG00020011167	87.1887	-2.39569	1.06379	-2.25202	0.024321	0.158656	1.30878
ENSOARG00020013263	254.932	-2.16332	0.996318	-2.17132	0.0299073	0.158656	1.61016
ENSOARG00020010531	23.8805	-3.58773	1.59004	-2.25637	0.0240472	0.158682	1.29294
ENSOARG00020004044	877.111	-1.55285	0.66473	-2.33606	0.0194883	0.158738	1.04392
ENSOARG00020006856	41.3879	2.50893	1.10812	2.26414	0.0235656	0.158738	1.26379
ENSOARG00020008504	415.734	-1.72461	0.794729	-2.17006	0.0300027	0.158738	1.60702
ENSOARG00020016223	113.011	1.92324	0.873148	2.20265	0.0276191	0.158738	1.48023
ENSOARG00020022902	31.6152	3.95233	1.68236	2.34927	0.0188101	0.158738	1.00898
ENSOARG00020017303	96.7887	-2.1574	1.03599	-2.08244	0.037302	0.159417	1.98802
ENSOARG00020022070	45.8768	-2.8756	1.27915	-2.24805	0.0245729	0.159417	1.30878
ENSOARG00020020914	1051.81	-1.55486	0.666328	-2.33348	0.0196231	0.159494	1.04392
ENSOARG00020005583	111.571	1.94209	0.887648	2.18791	0.0286763	0.15954	1.52196
ENSOARG00020007386	11.0201	-4.88655	2.16641	-2.2556	0.0240958	0.15954	1.27894
ENSOARG00020022920	122.477	-1.82869	0.831548	-2.19914	0.0278679	0.15954	1.47924
ENSOARG00020004341	15625.3	-2.03119	0.859542	-2.36311	0.0181224	0.159656	0.960466
ENSOARG00020010668	17207.5	-1.8243	0.769318	-2.37132	0.0177246	0.159668	0.938671
ENSOARG00020008915	417.374	-1.74596	0.807433	-2.16236	0.0305902	0.160535	1.61016
ENSOARG00020008942	674.161	-2.17149	0.920501	-2.35903	0.0183228	0.16128	0.958942
ENSOARG00020024779	62.2662	-2.11959	0.961941	-2.20345	0.0275634	0.16128	1.44216
ENSOARG00020003321	15.6061	3.74571	1.6685	2.24495	0.0247714	0.161472	1.29366
ENSOARG00020000405	93.21	2.09764	1.01161	2.07356	0.0381202	0.161586	1.98802
ENSOARG00020016521	57.2666	2.4178	1.09823	2.20155	0.0276971	0.161731	1.44216
ENSOARG00020012139	136.318	1.90933	0.921799	2.07131	0.0383302	0.162255	1.98802
ENSOARG00020015678	1512.37	-2.88865	1.22253	-2.36284	0.0181355	0.162407	0.938671
ENSOARG00020018177	101.879	-2.01841	0.922122	-2.18888	0.0286056	0.162407	1.48023
ENSOARG00020022691	121.316	1.86319	0.85733	2.17324	0.0297619	0.163045	1.533
ENSOARG00020009493	36.8212	-3.23507	1.44963	-2.23166	0.0256375	0.163098	1.31903
ENSOARG00020010695	119.749	-2.32495	1.06334	-2.18646	0.0287817	0.163098	1.47924
ENSOARG00020011120	134.647	2.08016	0.956321	2.17517	0.0296177	0.163098	1.52196
ENSOARG00020001188	26.2794	-2.69652	1.20479	-2.23816	0.0252109	0.163311	1.29294
ENSOARG00020020417	20.6958	-3.65943	1.6355	-2.23749	0.025254	0.163389	1.29366
ENSOARG00020001935	338.841	-1.65269	0.768515	-2.1505	0.0315154	0.164025	1.60702
ENSOARG00020007552	266.861	-2.27456	1.0582	-2.14946	0.0315977	0.164025	1.61016
ENSOARG00020004655	35.4606	3.57982	1.60744	2.22703	0.0259452	0.164298	1.31903
ENSOARG00020025439	428.985	1.77418	0.826121	2.1476	0.0317455	0.164569	1.61016
ENSOARG00020022351	305.055	1.52283	0.709244	2.14712	0.0317839	0.164895	1.60702
ENSOARG00020024153	930.678	-1.90216	0.821911	-2.31432	0.0206502	0.164895	1.04392
ENSOARG00020005117	95.5508	1.88978	0.867423	2.17862	0.0293602	0.165228	1.48023
ENSOARG00020001851	328.322	-1.89824	0.885099	-2.14466	0.0319798	0.165544	1.60702
ENSOARG00020002952	93.1026	2.19	1.00602	2.1769	0.0294882	0.165544	1.48023
ENSOARG00020016388	66.3933	2.15323	0.994201	2.16579	0.0303272	0.165544	1.52196
ENSOARG00020018231	90.0334	2.12024	0.978824	2.16611	0.0303026	0.165544	1.52196
ENSOARG00020002463	25.1616	3.08619	1.38981	2.22059	0.026379	0.165699	1.31903
ENSOARG00020010218	10.2017	-4.76128	2.12758	-2.23789	0.0252282	0.165699	1.26295
ENSOARG00020017156	2802.68	-1.59802	0.691643	-2.31047	0.0208623	0.165699	1.04392
ENSOARG00020026177	87.6244	2.2476	1.02824	2.18587	0.0288248	0.165699	1.44216
ENSOARG00020009185	48.1685	2.55585	1.16996	2.18457	0.0289204	0.16604	1.44216
ENSOARG00020008419	30.4532	-2.61291	1.16884	-2.23548	0.0253857	0.166206	1.26379
ENSOARG00020006157	348.733	1.52869	0.707348	2.16115	0.0306836	0.166552	1.52196
ENSOARG00020012203	677.447	1.94009	0.826631	2.34699	0.018926	0.166552	0.938671
ENSOARG00020015016	270.546	1.69205	0.790939	2.13929	0.0324124	0.166552	1.60702
ENSOARG00020007664	54.5567	-2.88068	1.29761	-2.22	0.026419	0.166562	1.30878
ENSOARG00020019165	267.433	1.65756	0.775023	2.13873	0.0324578	0.166562	1.60702
ENSOARG00020013489	146.24	1.93131	0.889758	2.17061	0.029961	0.166807	1.48023
ENSOARG00020006869	14.7068	5.26429	2.35945	2.23115	0.0256713	0.167401	1.26295
ENSOARG00020007751	147.1	-2.06579	0.959187	-2.15369	0.0312648	0.167851	1.533
ENSOARG00020004317	5238.28	-1.83101	0.795384	-2.30205	0.0213324	0.167986	1.04392
ENSOARG00020016947	11.0161	5.01165	2.26672	2.21097	0.0270381	0.167986	1.32291
ENSOARG00020020998	9.62702	4.84807	2.19305	2.21065	0.0270601	0.168011	1.32291
ENSOARG00020017155	56.212	2.85149	1.28775	2.21431	0.0268072	0.168015	1.30878
ENSOARG00020017300	100.051	1.69828	0.788042	2.15507	0.0311566	0.168015	1.52196
ENSOARG00020016000	44.1704	1.94104	0.901167	2.15392	0.0312464	0.168294	1.52196
ENSOARG00020022713	77.4172	-2.43321	1.12461	-2.16361	0.0304947	0.168877	1.47924
ENSOARG00020025507	116.425	-2.24173	1.03624	-2.16334	0.0305152	0.168879	1.47924
ENSOARG00020004294	45.6476	-2.56179	1.17924	-2.1724	0.0298256	0.169193	1.44216
ENSOARG00020009717	35.0764	-3.2914	1.48007	-2.22381	0.026161	0.169239	1.26379
ENSOARG00020015809	48.3208	2.17041	1.00016	2.17007	0.0300019	0.169968	1.44216
ENSOARG00020017909	12.9015	4.19818	1.90529	2.20344	0.0275641	0.170121	1.32291
ENSOARG00020005652	243.206	-1.82658	0.859614	-2.12488	0.0335964	0.170248	1.61016
ENSOARG00020015693	204.297	1.63829	0.804209	2.03714	0.0416361	0.170713	1.98802
ENSOARG00020018365	22.2906	3.00218	1.36311	2.20245	0.0276337	0.170713	1.31903
ENSOARG00020008688	29.2169	2.77525	1.20413	2.30478	0.0211792	0.170931	1.00898
ENSOARG00020022698	87.9337	2.56457	1.16345	2.20427	0.0275051	0.171024	1.30878
ENSOARG00020010702	56.55	-2.72689	1.25912	-2.16571	0.0303331	0.171051	1.44216
ENSOARG00020012422	228.903	1.89172	0.891903	2.121	0.033922	0.171219	1.61016
ENSOARG00020003227	65.0066	2.20304	1.01782	2.16446	0.0304288	0.171252	1.44216
ENSOARG00020009238	9.34921	-4.64365	2.07917	-2.23341	0.0255218	0.171252	1.21006
ENSOARG00020002216	13.6617	3.36516	1.50767	2.23202	0.0256134	0.171688	1.21006
ENSOARG00020000287	41.553	-2.60079	1.16177	-2.23866	0.0251783	0.171791	1.18761
ENSOARG00020000901	101.142	-3.10424	1.44297	-2.15128	0.031454	0.171791	1.48023
ENSOARG00020009812	221.891	2.03347	0.960232	2.11769	0.0342013	0.171791	1.61016
ENSOARG00020010445	126.941	-1.85003	0.859836	-2.15161	0.0314281	0.171791	1.48023
ENSOARG00020017690	24.8148	3.21458	1.45764	2.20534	0.0274305	0.171791	1.29294
ENSOARG00020019358	115.795	-1.83388	0.857015	-2.13985	0.0323671	0.171819	1.52196
ENSOARG00020025613	12.2819	4.10129	1.86124	2.20352	0.0275582	0.171995	1.29366
ENSOARG00020012661	112.116	2.38496	1.10934	2.1499	0.0315633	0.17205	1.48023
ENSOARG00020024613	228.002	-1.7774	0.839761	-2.11655	0.0342978	0.172093	1.60702
ENSOARG00020011012	624.74	1.79221	0.846907	2.11618	0.0343291	0.172138	1.60702
ENSOARG00020010429	129.269	1.7541	0.820643	2.13747	0.0325597	0.172277	1.52196
ENSOARG00020008331	13.9914	-3.78142	1.69789	-2.22713	0.0259388	0.172508	1.21006
ENSOARG00020023270	308.255	-1.58694	0.738885	-2.14776	0.0317332	0.172528	1.47924
ENSOARG00020001999	58.8338	3.07003	1.39822	2.19567	0.0281156	0.172549	1.30878
ENSOARG00020022335	166.801	2.25782	1.05152	2.14719	0.0317785	0.172549	1.47924
ENSOARG00020001199	94.4082	2.58658	1.21343	2.13163	0.0330376	0.172668	1.533
ENSOARG00020015065	53.1029	-2.71578	1.2166	-2.23227	0.0255974	0.172668	1.18761
ENSOARG00020017031	39.7677	-2.61903	1.19499	-2.19168	0.0284029	0.172668	1.31903
ENSOARG00020026105	26.1939	4.51562	1.96721	2.29545	0.0217074	0.172668	1.00898
ENSOARG00020005475	13.572	4.09411	1.85932	2.20194	0.0276698	0.173032	1.27894
ENSOARG00020006418	241.124	-1.8943	0.897377	-2.11093	0.034778	0.173032	1.60702
ENSOARG00020017971	31.8664	-2.47944	1.12816	-2.19777	0.0279657	0.173032	1.29366
ENSOARG00020002017	328.212	-2.37248	1.12509	-2.1087	0.0349706	0.173539	1.61016
ENSOARG00020019006	2880.43	-1.59776	0.692053	-2.30872	0.0209592	0.174251	0.960466
ENSOARG00020020641	400.125	-2.27611	1.08112	-2.10532	0.0352631	0.174663	1.61016
ENSOARG00020022031	202.942	-1.87377	0.875924	-2.13919	0.0324199	0.174663	1.48023
ENSOARG00020016102	99.6347	2.17445	1.02348	2.12457	0.0336223	0.174681	1.533
ENSOARG00020025085	4920.91	-1.88807	0.818261	-2.30741	0.0210318	0.174681	0.958942
ENSOARG00020017968	77.5661	2.2521	1.0532	2.13835	0.0324886	0.174812	1.47924
ENSOARG00020020787	427.312	-1.73872	0.813392	-2.13761	0.0325482	0.174902	1.48023
ENSOARG00020016591	412.484	1.50998	0.706527	2.13719	0.0325828	0.174975	1.48023
ENSOARG00020005803	23.998	3.69155	1.68535	2.19037	0.0284974	0.174994	1.29366
ENSOARG00020007979	13.2748	-4.20695	1.91825	-2.19312	0.0282991	0.175663	1.27894
ENSOARG00020025420	236.045	-1.8282	0.86089	-2.12362	0.0337022	0.175685	1.52196
ENSOARG00020007845	21.869	4.4931	2.06163	2.1794	0.0293023	0.176136	1.31903
ENSOARG00020022759	96.2794	-2.12043	0.993994	-2.13324	0.0329046	0.176136	1.48023
ENSOARG00020000289	1584.24	-2.11903	0.921562	-2.2994	0.0214825	0.176238	0.958479
ENSOARG00020003005	51.9826	-3.29161	1.48434	-2.21755	0.0265853	0.176238	1.18761
ENSOARG00020004315	41.3422	-2.65918	1.21303	-2.19219	0.0283659	0.176238	1.26379
ENSOARG00020004762	337.63	-1.6572	0.790068	-2.09754	0.0359455	0.176238	1.60702
ENSOARG00020004766	38.0656	2.30853	1.05725	2.18353	0.0289967	0.176238	1.29366
ENSOARG00020006113	1586.34	1.77935	0.770809	2.30842	0.0209757	0.176238	0.938671
ENSOARG00020011740	40.8944	-2.63754	1.20284	-2.19277	0.0283239	0.176238	1.26379
ENSOARG00020011920	827.597	-2.41769	1.05061	-2.30123	0.0213787	0.176238	0.958479
ENSOARG00020012004	49.783	-2.85294	1.30873	-2.17993	0.0292629	0.176238	1.30878
ENSOARG00020014296	75.7495	2.14964	1.00944	2.12955	0.0332091	0.176238	1.47924
ENSOARG00020014881	936.136	-1.67533	0.728837	-2.29863	0.0215259	0.176238	0.958942
ENSOARG00020017188	89.2951	-2.7625	1.29695	-2.12999	0.0331725	0.176238	1.47924
ENSOARG00020017786	10741.7	1.73231	0.752791	2.30119	0.0213809	0.176238	0.958479
ENSOARG00020019833	87.938	-2.70375	1.26858	-2.13133	0.033062	0.176238	1.47924
ENSOARG00020020921	53.5971	2.64238	1.2476	2.11797	0.034178	0.176238	1.52196
ENSOARG00020026316	1470.5	-1.70199	0.751243	-2.26556	0.0234781	0.176391	1.04392
ENSOARG00020022811	73.7097	2.17012	1.01523	2.13756	0.0325523	0.176918	1.44216
ENSOARG00020017657	8002.78	2.16853	0.944664	2.29556	0.0217011	0.176982	0.960466
ENSOARG00020025938	249.06	-2.24187	1.07233	-2.09065	0.0365596	0.17774	1.61016
ENSOARG00020001161	218.524	1.65623	0.792106	2.09091	0.0365358	0.177859	1.60702
ENSOARG00020002698	16.3938	-3.89153	1.76666	-2.20277	0.0276113	0.178164	1.21006
ENSOARG00020004179	1128.46	-1.64676	0.718446	-2.29211	0.0218992	0.178164	0.960466
ENSOARG00020011066	11.0424	4.88141	2.25246	2.16715	0.0302237	0.178164	1.32291
ENSOARG00020013228	74.4113	1.79831	0.851795	2.1112	0.0347549	0.178164	1.52196
ENSOARG00020017603	171.355	-1.91561	0.902472	-2.12263	0.0337852	0.178164	1.48023
ENSOARG00020025253	38.5851	2.98901	1.37396	2.17547	0.0295946	0.178288	1.29366
ENSOARG00020004456	30.7614	3.11397	1.43707	2.16689	0.0302432	0.178353	1.31903
ENSOARG00020020384	26.4954	-2.83936	1.30544	-2.17501	0.0296291	0.178353	1.29294
ENSOARG00020024753	536.644	-1.58965	0.761432	-2.08771	0.0368242	0.178353	1.60702
ENSOARG00020020144	13.1987	3.83883	1.75855	2.18295	0.0290397	0.178747	1.26295
ENSOARG00020001190	170.306	1.86996	0.936304	1.99718	0.045806	0.178944	1.98802
ENSOARG00020015322	173.378	-2.01558	1.00934	-1.99692	0.0458334	0.178944	1.98802
ENSOARG00020026035	319.281	-1.62665	0.767753	-2.11871	0.0341148	0.178944	1.47924
ENSOARG00020015406	376.545	1.54716	0.730428	2.11815	0.0341623	0.17896	1.48023
ENSOARG00020012212	738.299	-1.84733	0.819174	-2.25511	0.0241264	0.179099	1.04392
ENSOARG00020004368	231.734	-1.49166	0.704683	-2.11678	0.0342783	0.17923	1.48023
ENSOARG00020007037	83.7886	2.37375	1.12122	2.11712	0.0342497	0.17923	1.47924
ENSOARG00020020489	75.5978	-2.07292	0.979568	-2.11616	0.0343314	0.179516	1.47924
ENSOARG00020022494	18.6081	3.92345	1.78764	2.19477	0.02818	0.180016	1.21006
ENSOARG00020016127	20.066	3.40276	1.56996	2.16742	0.0302025	0.180355	1.29366
ENSOARG00020009372	179.163	2.10417	0.995876	2.11289	0.0346104	0.180513	1.48023
ENSOARG00020003897	488.663	-1.5887	0.752404	-2.1115	0.0347294	0.181142	1.47924
ENSOARG00020003180	211.804	2.17132	1.04572	2.07639	0.0378578	0.181227	1.61016
ENSOARG00020011675	151.525	-1.80293	0.858841	-2.09926	0.0357939	0.181227	1.52196
ENSOARG00020006916	1936.75	-1.58899	0.707252	-2.24671	0.0246586	0.181687	1.04392
ENSOARG00020008195	323.156	-1.656	0.798003	-2.07518	0.0379697	0.181687	1.60702
ENSOARG00020016704	11.3342	3.9009	1.81093	2.15408	0.0312337	0.181687	1.32291
ENSOARG00020018738	131.235	-1.99125	1.00245	-1.98639	0.0469903	0.181687	1.98802
ENSOARG00020001930	111.145	2.07066	0.989003	2.09368	0.0362881	0.181807	1.533
ENSOARG00020012436	153.722	1.92364	0.918864	2.0935	0.0363043	0.181807	1.533
ENSOARG00020006587	39.315	-2.25394	1.04697	-2.15283	0.0313321	0.181895	1.31903
ENSOARG00020010312	539.101	-1.44474	0.68553	-2.10748	0.0350757	0.181895	1.47924
ENSOARG00020020886	94.1237	1.92879	0.920673	2.09498	0.0361725	0.181895	1.52196
ENSOARG00020023823	29.7037	-2.78254	1.288	-2.16036	0.0307448	0.181895	1.29366
ENSOARG00020026060	28.8273	-3.26153	1.50913	-2.1612	0.0306797	0.181895	1.29294
ENSOARG00020014080	52.5294	3.35269	1.59201	2.10594	0.0352096	0.182053	1.47924
ENSOARG00020019385	17.5672	-3.3001	1.53484	-2.15012	0.0315455	0.182268	1.32291
ENSOARG00020018029	1126.42	1.74625	0.77877	2.24232	0.024941	0.182509	1.04392
ENSOARG00020002613	67.8716	-2.12567	1.00544	-2.11417	0.034501	0.182532	1.44216
ENSOARG00020005793	144.451	1.797	0.854141	2.10387	0.0353898	0.182532	1.47924
ENSOARG00020011786	19.4607	-3.56179	1.64494	-2.16529	0.0303653	0.183079	1.26379
ENSOARG00020022829	369.351	1.49913	0.725174	2.06727	0.0387091	0.183079	1.61016
ENSOARG00020025464	22.5734	-3.11395	1.43824	-2.16511	0.030379	0.183079	1.26379
ENSOARG00020013783	379.459	-1.59597	0.772231	-2.0667	0.0387623	0.183218	1.61016
ENSOARG00020017204	21.34	3.077	1.42835	2.15423	0.0312218	0.183568	1.29366
ENSOARG00020014274	103.153	1.83033	0.871568	2.10004	0.0357254	0.183582	1.47924
ENSOARG00020017480	1429.4	-1.58476	0.697965	-2.27054	0.0231748	0.183589	0.958942
ENSOARG00020026101	2574.36	2.00662	0.896895	2.23729	0.0252672	0.183758	1.04392
ENSOARG00020003958	35.8217	2.86609	1.33151	2.1525	0.0313578	0.183913	1.29366
ENSOARG00020016393	10.7429	-3.88455	1.80147	-2.15632	0.0310583	0.18414	1.27894
ENSOARG00020012981	9.78589	-4.71193	2.18646	-2.15505	0.0311582	0.184619	1.27894
ENSOARG00020008254	93.9268	2.70391	1.29023	2.09568	0.0361103	0.184752	1.48023
ENSOARG00020012750	49.8752	-2.24772	1.07872	-2.08369	0.0371886	0.184939	1.52196
ENSOARG00020001011	38.4468	-2.79614	1.30646	-2.14024	0.0323353	0.185373	1.31903
ENSOARG00020003565	24.8346	2.69282	1.25859	2.13956	0.0323907	0.185373	1.31903
ENSOARG00020008870	67.7114	-2.1348	1.01967	-2.09361	0.0362943	0.185373	1.47924
ENSOARG00020013169	372.582	-1.72794	0.825552	-2.09308	0.0363424	0.185373	1.48023
ENSOARG00020015730	188.985	1.53423	0.778903	1.96973	0.0488698	0.185373	1.98802
ENSOARG00020020958	3384.69	-1.64732	0.727527	-2.26428	0.023557	0.185373	0.958479
ENSOARG00020017049	1012	-1.64209	0.725991	-2.26186	0.0237058	0.186009	0.960466
ENSOARG00020008767	38.2051	-3.00457	1.40072	-2.14502	0.0319513	0.186125	1.29294
ENSOARG00020000276	217.239	-1.65952	0.793962	-2.09017	0.0366022	0.186126	1.48023
ENSOARG00020016450	287.703	-1.97345	0.944768	-2.08882	0.0367241	0.186632	1.48023
ENSOARG00020015460	432.53	2.11481	1.01267	2.08835	0.036766	0.186731	1.48023
ENSOARG00020004908	31.454	-2.55137	1.18607	-2.15111	0.0314674	0.186831	1.26379
ENSOARG00020017319	441.842	-1.72781	0.827789	-2.08726	0.036865	0.186831	1.48023
ENSOARG00020022231	332.161	-1.91621	0.917982	-2.08742	0.0368505	0.186831	1.47924
ENSOARG00020024091	16.1858	3.44332	1.61452	2.13272	0.0329479	0.186831	1.32291
ENSOARG00020025547	55.3209	-3.07184	1.47215	-2.08664	0.0369209	0.187074	1.47924
ENSOARG00020005905	280.976	-1.85725	0.9057	-2.05062	0.0403035	0.187495	1.61016
ENSOARG00020018558	71.0493	2.322	1.11406	2.08427	0.0371356	0.187933	1.47924
ENSOARG00020012722	22.5425	-2.78582	1.30847	-2.12906	0.0332489	0.188359	1.31903
ENSOARG00020013266	52.7184	1.95347	0.933266	2.09315	0.0363357	0.188359	1.44216
ENSOARG00020026182	361.993	-1.57014	0.766732	-2.04784	0.0405759	0.188359	1.61016
ENSOARG00020020547	53.9315	-3.02902	1.44855	-2.09108	0.0365209	0.189115	1.44216
ENSOARG00020006754	131.282	-1.90486	0.921255	-2.06768	0.0386701	0.189631	1.52196
ENSOARG00020024857	212.019	-1.91361	0.920678	-2.07848	0.0376656	0.189797	1.48023
ENSOARG00020020421	1262.05	1.66845	0.73873	2.25854	0.023912	0.189868	0.938671
ENSOARG00020025329	618.571	-1.71684	0.830828	-2.06642	0.0387888	0.189868	1.52196
ENSOARG00020000146	2784.42	-1.82228	0.810397	-2.24862	0.0245365	0.190041	0.958942
ENSOARG00020002714	77.4421	1.82094	0.872867	2.08616	0.0369645	0.190041	1.44216
ENSOARG00020005217	22.0018	2.35051	1.10729	2.12275	0.0337748	0.190041	1.31903
ENSOARG00020014418	56.0665	-2.4814	1.20132	-2.06556	0.0388697	0.190041	1.52196
ENSOARG00020014624	259.378	-1.47421	0.721851	-2.04226	0.0411259	0.190041	1.60702
ENSOARG00020015039	1401.34	-1.60304	0.710393	-2.25655	0.024036	0.190041	0.938671
ENSOARG00020019113	10.6932	4.97343	2.32295	2.141	0.0322743	0.190041	1.26295
ENSOARG00020022108	176.087	1.58761	0.770279	2.06109	0.0392946	0.190041	1.533
ENSOARG00020012311	2837.42	-1.52459	0.67586	-2.25577	0.0240851	0.190121	0.938671
ENSOARG00020003881	2019.07	-1.49219	0.664229	-2.24649	0.0246724	0.190331	0.958942
ENSOARG00020006336	72.7821	-2.34065	1.10256	-2.12293	0.03376	0.190331	1.30878
ENSOARG00020009117	103.324	1.86069	0.95391	1.95059	0.0511056	0.190331	1.98802
ENSOARG00020014069	107.497	1.67166	0.857229	1.95008	0.0511668	0.190331	1.98802
ENSOARG00020015061	3204.57	1.85344	0.825265	2.24587	0.0247123	0.190331	0.958942
ENSOARG00020023091	15.4891	-3.88651	1.81803	-2.13776	0.0325365	0.190331	1.26295
ENSOARG00020024818	30.3838	3.22854	1.51064	2.1372	0.0325815	0.190331	1.26379
ENSOARG00020001959	34.5764	-2.65369	1.2473	-2.12754	0.0333752	0.190352	1.29294
ENSOARG00020023847	195.318	-2.01951	0.974453	-2.07246	0.038223	0.190432	1.47924
ENSOARG00020023536	169.421	1.94542	0.938967	2.07187	0.0382779	0.190534	1.47924
ENSOARG00020025231	1402.66	-1.86435	0.830979	-2.24355	0.0248611	0.190534	0.960466
ENSOARG00020002350	48.0684	2.05316	0.986318	2.08164	0.0373751	0.190653	1.44216
ENSOARG00020014163	340.968	-1.84814	0.893064	-2.06944	0.038505	0.191196	1.47924
ENSOARG00020021377	440.313	-1.69641	0.833909	-2.03429	0.0419225	0.191196	1.61016
ENSOARG00020024870	14.799	-4.33166	2.03011	-2.1337	0.0328671	0.191196	1.26295
ENSOARG00020014361	80.8622	-2.17131	1.04941	-2.06909	0.0385379	0.191201	1.47924
ENSOARG00020022113	125.196	2.54661	1.23989	2.0539	0.0399851	0.191311	1.533
ENSOARG00020010360	40.7163	-2.30586	1.09024	-2.11501	0.0344293	0.191337	1.31903
ENSOARG00020007502	50.1831	2.48346	1.20126	2.06737	0.0386991	0.191545	1.47924
ENSOARG00020023466	129.211	-2.36595	1.14454	-2.06716	0.0387186	0.191545	1.48023
ENSOARG00020023116	273.573	1.61111	0.784004	2.05497	0.0398816	0.191744	1.52196
ENSOARG00020002378	197.652	-1.7455	0.851001	-2.05112	0.0402554	0.191806	1.533
ENSOARG00020005611	46.4393	2.70071	1.27622	2.11618	0.0343291	0.191806	1.30878
ENSOARG00020011313	11.1201	-4.06865	1.92697	-2.11142	0.0347359	0.191806	1.32291
ENSOARG00020022397	177.586	-2.23343	1.08167	-2.0648	0.0389417	0.192176	1.47924
ENSOARG00020011907	18.5968	-3.37643	1.59466	-2.11733	0.0342319	0.193053	1.29366
ENSOARG00020019829	716.804	-1.60136	0.727219	-2.20203	0.0276633	0.193217	1.04392
ENSOARG00020000236	343.946	-1.5703	0.761894	-2.06105	0.0392982	0.193462	1.48023
ENSOARG00020019077	21.8738	-3.07912	1.44897	-2.12504	0.033583	0.193527	1.26379
ENSOARG00020025920	16.7165	4.52072	2.12782	2.12458	0.0336218	0.193764	1.26295
ENSOARG00020025148	24.067	-3.14871	1.48249	-2.12393	0.0336761	0.193835	1.26379
ENSOARG00020006033	9.96244	4.34313	2.0285	2.14105	0.0322696	0.193872	1.21006
ENSOARG00020019476	69.4954	2.26158	1.09863	2.05854	0.0395384	0.194087	1.47924
ENSOARG00020022319	1083.93	-1.73941	0.779581	-2.23122	0.0256668	0.194087	0.960466
ENSOARG00020014964	12.6389	3.03552	1.43348	2.11759	0.0342095	0.194114	1.27894
ENSOARG00020006145	129.822	2.12771	1.0402	2.04548	0.0408077	0.194354	1.52196
ENSOARG00020012967	11.0978	4.25176	1.98784	2.13888	0.0324452	0.194354	1.21006
ENSOARG00020007710	266.433	-1.64641	0.800607	-2.05645	0.0397389	0.194499	1.47924
ENSOARG00020009332	44.6924	2.4167	1.18191	2.04474	0.0408809	0.194499	1.52196
ENSOARG00020002636	126.829	-2.13954	1.04105	-2.05517	0.0398627	0.194499	1.48023
ENSOARG00020002765	104.691	1.55245	0.755011	2.0562	0.0397634	0.194499	1.47924
ENSOARG00020021139	1552.68	-1.74447	0.779719	-2.2373	0.0252665	0.194499	0.938671
ENSOARG00020021658	6128.71	2.20734	0.99071	2.22804	0.0258781	0.194499	0.960466
ENSOARG00020023556	405.369	1.90834	0.928405	2.05551	0.03983	0.194499	1.48023
ENSOARG00020003457	134.842	-1.67058	0.866314	-1.92838	0.0538081	0.195273	1.98802
ENSOARG00020000572	32.8281	-2.22725	1.05672	-2.1077	0.0350572	0.195505	1.29294
ENSOARG00020023148	105.978	1.64596	0.854313	1.92665	0.0540228	0.195823	1.98802
ENSOARG00020000307	694.292	-1.86192	0.837275	-2.22378	0.0261631	0.196114	0.960466
ENSOARG00020011039	361.422	1.6635	0.825428	2.01532	0.0438712	0.196114	1.61016
ENSOARG00020012533	5008.54	2.21547	0.9965	2.22325	0.026199	0.196222	0.960466
ENSOARG00020003837	124.806	1.83892	0.903755	2.03475	0.0418756	0.196387	1.533
ENSOARG00020007796	10.1293	-3.88166	1.82236	-2.13002	0.03317	0.196845	1.21006
ENSOARG00020023447	13196.5	-1.62324	0.727791	-2.23036	0.0257232	0.196845	0.938671
ENSOARG00020018359	1936.44	1.72471	0.776608	2.22082	0.0263629	0.19691	0.960466
ENSOARG00020023124	51.8604	2.91564	1.38991	2.09772	0.0359296	0.19691	1.30878
ENSOARG00020004431	16.2355	-3.18522	1.5222	-2.09252	0.0363924	0.197201	1.32291
ENSOARG00020001663	10.0088	-3.86733	1.84909	-2.09148	0.0364854	0.197411	1.32291
ENSOARG00020003566	55.7207	-2.43368	1.18984	-2.04539	0.0408166	0.197411	1.47924
ENSOARG00020016429	17.6939	4.18957	1.99064	2.10464	0.0353226	0.197411	1.27894
ENSOARG00020019793	4170.91	-1.82923	0.836802	-2.18597	0.0288175	0.197411	1.04392
ENSOARG00020023409	62.6748	2.35692	1.1588	2.03394	0.0419577	0.197411	1.52196
ENSOARG00020001735	108.139	-2.19786	1.08133	-2.03255	0.0420983	0.197596	1.52196
ENSOARG00020008142	50.4638	2.60984	1.27078	2.05374	0.0400011	0.198027	1.44216
ENSOARG00020003783	89.6174	-2.02409	0.990903	-2.04267	0.0410852	0.198106	1.47924
ENSOARG00020009575	411.625	-1.55081	0.759409	-2.04212	0.0411392	0.198106	1.48023
ENSOARG00020016737	48.094	2.04991	1.0037	2.04235	0.0411173	0.198106	1.47924
ENSOARG00020012051	1251.71	1.91037	0.87547	2.18211	0.0291015	0.198569	1.04392
ENSOARG00020003485	159.619	-2.32389	1.14775	-2.02474	0.0428938	0.19873	1.533
ENSOARG00020014986	2044.03	-1.50657	0.690839	-2.18079	0.029199	0.19873	1.04392
ENSOARG00020022529	55.1706	2.05799	1.00366	2.05048	0.0403173	0.19873	1.44216
ENSOARG00020024466	37.2742	2.62816	1.25448	2.09503	0.0361684	0.19873	1.29366
ENSOARG00020024593	437.663	1.91187	0.953675	2.00474	0.0449903	0.19873	1.61016
ENSOARG00020000363	227.859	1.94923	0.972947	2.00343	0.0451309	0.199008	1.60702
ENSOARG00020006299	15507.4	1.9962	0.902332	2.21227	0.0269481	0.199008	0.960466
ENSOARG00020009939	13.9594	4.9997	2.38248	2.09853	0.0358582	0.199008	1.27894
ENSOARG00020026222	395.736	-1.68459	0.841199	-2.0026	0.0452198	0.199008	1.61016
ENSOARG00020002881	457.926	1.69028	0.844868	2.00064	0.0454307	0.199219	1.61016
ENSOARG00020009584	31.0409	-3.20594	1.4638	-2.19016	0.028513	0.199219	1.00898
ENSOARG00020010869	21.6448	3.49627	1.67078	2.0926	0.0363853	0.199219	1.29294
ENSOARG00020012033	53.3009	2.14336	1.04725	2.04666	0.0406915	0.199219	1.44216
ENSOARG00020012519	34.6526	2.93133	1.40737	2.08284	0.0372654	0.199219	1.31903
ENSOARG00020017126	12.4058	2.88152	1.37159	2.10086	0.0356535	0.199219	1.26295
ENSOARG00020020689	369.061	1.75847	0.863851	2.03562	0.0417887	0.199219	1.48023
ENSOARG00020025774	339.314	1.5863	0.792527	2.00157	0.0453309	0.199219	1.61016
ENSOARG00020025886	470.665	1.58306	0.791325	2.00051	0.0454449	0.199219	1.61016
ENSOARG00020019807	268.731	-2.10322	1.05218	-1.99892	0.0456173	0.200001	1.60702
ENSOARG00020021555	30.4892	-3.86955	1.84486	-2.09747	0.0359517	0.200319	1.26379
ENSOARG00020019718	10.7164	4.82591	2.28208	2.1147	0.0344558	0.200393	1.21006
ENSOARG00020004769	1228.64	-1.87372	0.849045	-2.20686	0.027324	0.200513	0.958479
ENSOARG00020005287	23.077	3.66504	1.7631	2.07875	0.0376406	0.200602	1.31903
ENSOARG00020011047	3828.19	-1.51252	0.685627	-2.20604	0.0273815	0.200706	0.958479
ENSOARG00020008010	36.4508	2.2709	1.08884	2.08562	0.0370127	0.200895	1.29366
ENSOARG00020011140	21.252	-3.08623	1.47337	-2.09468	0.0361995	0.201011	1.26379
ENSOARG00020009079	60.7483	2.21602	1.09829	2.01771	0.0436215	0.201021	1.52196
ENSOARG00020009664	751.623	-2.03309	0.919271	-2.21164	0.0269917	0.201564	0.938671
ENSOARG00020005823	330.908	1.45215	0.728604	1.99306	0.0462549	0.201645	1.60702
ENSOARG00020009032	56.3259	2.39792	1.15452	2.07699	0.0378027	0.202237	1.30878
ENSOARG00020011074	840.92	-1.5992	0.724297	-2.20794	0.0272486	0.202677	0.938671
ENSOARG00020012394	21.3388	2.5033	1.20793	2.0724	0.0382283	0.202677	1.31903
ENSOARG00020013409	204.237	-2.36845	1.1786	-2.00955	0.0444789	0.202677	1.533
ENSOARG00020013410	9.00141	4.25974	2.04351	2.08452	0.0371132	0.202677	1.27894
ENSOARG00020022139	169.966	1.80923	0.893643	2.02456	0.0429127	0.202677	1.48023
ENSOARG00020020846	198.951	1.55394	0.773513	2.00893	0.0445442	0.202755	1.533
ENSOARG00020025016	30.8153	3.14548	1.44357	2.17897	0.0293343	0.202755	1.00898
ENSOARG00020013166	117.707	-2.13417	1.06112	-2.01125	0.0442987	0.202758	1.52196
ENSOARG00020023710	20.3887	3.71696	1.77993	2.08826	0.0367746	0.202758	1.26379
ENSOARG00020009670	542.152	-1.47333	0.741736	-1.98632	0.0469977	0.203214	1.61016
ENSOARG00020009249	1851.44	-1.923	0.889378	-2.16218	0.0306042	0.203993	1.04392
ENSOARG00020025666	1552.11	-1.7761	0.809208	-2.19487	0.0281732	0.204414	0.958479
ENSOARG00020001781	26.893	-2.50309	1.1516	-2.17358	0.029737	0.204844	1.00898
ENSOARG00020007322	78.0824	-2.53661	1.25066	-2.02823	0.0425372	0.204849	1.44216
ENSOARG00020018117	45.3981	2.6287	1.29616	2.02807	0.0425527	0.204849	1.44216
ENSOARG00020007240	3202.19	-1.4516	0.661997	-2.19277	0.0283242	0.204863	0.958942
ENSOARG00020013259	26.5463	3.74852	1.80847	2.07275	0.0381953	0.204863	1.29294
ENSOARG00020000862	16.9952	-3.58305	1.72545	-2.07659	0.0378395	0.205061	1.27894
ENSOARG00020019008	37.6597	-2.63583	1.27762	-2.06308	0.0391052	0.205365	1.31903
ENSOARG00020000047	320.276	-1.5512	0.783843	-1.97897	0.0478191	0.20549	1.61016
ENSOARG00020013477	239.183	1.72346	0.855493	2.01458	0.0439485	0.20549	1.48023
ENSOARG00020011771	601.358	-1.44679	0.718278	-2.01425	0.0439834	0.205547	1.47924
ENSOARG00020018494	265.792	-1.73452	0.86116	-2.01416	0.0439925	0.205547	1.47924
ENSOARG00020000157	212.851	1.8415	0.91461	2.01342	0.0440703	0.205568	1.48023
ENSOARG00020017881	133.647	1.50732	0.798901	1.88674	0.0591956	0.205568	1.98802
ENSOARG00020024839	386.776	1.9777	0.988371	2.00097	0.0453953	0.205802	1.52196
ENSOARG00020004688	115.289	-2.56267	1.28147	-1.99979	0.045523	0.205942	1.52196
ENSOARG00020008333	149.274	1.795	0.898773	1.99716	0.0458075	0.205942	1.533
ENSOARG00020010495	40.4322	-2.96731	1.36867	-2.16802	0.0301572	0.205942	1.00898
ENSOARG00020012242	184.668	-1.50826	0.749754	-2.01167	0.0442546	0.205942	1.47924
ENSOARG00020014139	27.4848	2.80362	1.2936	2.1673	0.0302118	0.205942	1.00898
ENSOARG00020015578	2604.85	-1.65996	0.759132	-2.18665	0.0287679	0.205942	0.958479
ENSOARG00020022847	831.629	-1.52555	0.697625	-2.18677	0.0287594	0.205942	0.958942
ENSOARG00020023463	116.367	1.87189	0.936443	1.99894	0.0456153	0.205942	1.52196
ENSOARG00020024288	128.465	2.05177	1.02639	1.99903	0.0456054	0.205942	1.52196
ENSOARG00020025232	146.426	1.92915	0.966835	1.99533	0.0460069	0.205942	1.533
ENSOARG00020000929	127.994	-2.37485	1.18156	-2.00993	0.0444383	0.206014	1.47924
ENSOARG00020000894	22.247	4.12955	1.99994	2.06484	0.0389382	0.206297	1.29366
ENSOARG00020019202	79.3994	-2.28934	1.11193	-2.05889	0.0395047	0.206766	1.30878
ENSOARG00020005788	41.5961	-2.58252	1.23071	-2.0984	0.0358695	0.206779	1.18761
ENSOARG00020014464	59.8818	1.92625	0.955028	2.01696	0.0437002	0.2073	1.44216
ENSOARG00020019966	54.8115	-3.03624	1.47595	-2.05714	0.0396728	0.2073	1.30878
ENSOARG00020017721	11.0427	-3.89049	1.86295	-2.08835	0.0367663	0.207556	1.21006
ENSOARG00020020268	146.835	2.36582	1.25975	1.87801	0.06038	0.207556	1.98802
ENSOARG00020006753	9.45915	4.23086	2.06337	2.05046	0.0403195	0.208082	1.32291
ENSOARG00020017738	27.2806	2.97373	1.43726	2.06903	0.038543	0.208097	1.26379
ENSOARG00020021959	22.1039	2.76263	1.3416	2.05921	0.0394744	0.208097	1.29366
ENSOARG00020010108	870.16	-1.45453	0.667401	-2.17939	0.0293029	0.208152	0.958479
ENSOARG00020018675	179.255	1.80948	0.91039	1.98759	0.0468571	0.208152	1.533
ENSOARG00020025627	424.489	-1.49585	0.746975	-2.00254	0.0452262	0.208152	1.48023
ENSOARG00020026026	43.2089	2.94084	1.43232	2.0532	0.0400528	0.208247	1.30878
ENSOARG00020021151	93.5577	1.7436	0.876273	1.98979	0.0466136	0.208296	1.52196
ENSOARG00020017583	173.073	-1.8725	0.936315	-1.99987	0.0455148	0.209004	1.48023
ENSOARG00020004303	80.7082	1.76015	0.885519	1.9877	0.0468448	0.209099	1.52196
ENSOARG00020000893	2443.54	-1.45047	0.666502	-2.17625	0.0295365	0.209234	0.958479
ENSOARG00020011010	646.328	1.50836	0.759219	1.98673	0.0469528	0.209351	1.52196
ENSOARG00020005168	14.929	4.38037	2.10441	2.08151	0.0373869	0.209551	1.21006
ENSOARG00020019543	416.999	-1.38495	0.693605	-1.99673	0.045854	0.209868	1.48023
ENSOARG00020023200	2857.98	-1.68891	0.776787	-2.17422	0.0296884	0.209868	0.958479
ENSOARG00020011549	33.4714	3.73385	1.8192	2.05247	0.0401242	0.210014	1.29294
ENSOARG00020012729	105.58	-2.13029	1.07527	-1.98118	0.0475716	0.210014	1.533
ENSOARG00020013495	75.7339	2.04764	1.03256	1.98306	0.0473608	0.21036	1.52196
ENSOARG00020022273	195.23	1.61804	0.866432	1.86747	0.0618355	0.21036	1.98802
ENSOARG00020016189	372.578	-1.64832	0.826742	-1.99376	0.0461788	0.210455	1.48023
ENSOARG00020016257	72.4287	1.93896	0.96702	2.00509	0.0449539	0.210455	1.44216
ENSOARG00020021571	2458.29	1.41107	0.660199	2.13733	0.0325709	0.210455	1.04392
ENSOARG00020023033	7060.92	1.96202	0.917827	2.13768	0.0325429	0.210455	1.04392
ENSOARG00020020563	799.743	-1.53436	0.706991	-2.17027	0.0299868	0.210478	0.960466
ENSOARG00020006176	226.201	-2.07577	1.04146	-1.99313	0.0462476	0.210514	1.48023
ENSOARG00020006413	727.991	1.94842	0.89819	2.16928	0.0300615	0.210772	0.960466
ENSOARG00020016119	8.87597	-4.56418	2.1987	-2.07585	0.0379075	0.210817	1.21006
[truncated: 10,609 more rows]

## Sheet: Study 3
Supplementary File S2: Results of the differential expression analysis per study along with meta-analysis.
[truncated: 16,378 more rows]

[truncated: 3 more sheets: Study 4, Study 5, Study 6]
