# Supplementary material for: Meta-analysis of RNA-Seq datasets highlights novel genes/pathways involved in fat deposition in fat-tail of sheep
Source: Front Vet Sci. 2023 May 12;10:1159921. doi: 10.3389/fvets.2023.1159921 (PMC10213422; doi:10.3389/fvets.2023.1159921)
Supplement: Supplementary file 3 [file Table_3.XLSX]

## Sheet: BP_Up
Supplementary File S3. Functional enrichment analysis results of down-regulated genes in fat-tailed breed. Marked cells are significant terms (Blue at p-value <0.05 and Yellow at FDR<0.05).
Term	P-value	Adjusted P-value	Odds Ratio	Genes Up
nuclear-transcribed mRNA catabolic process (GO:0000956)	0.00104201	0.313837	5.59687	EXOSC10;RPL22;RPL37A;RPL36;RPL36A;POLR2G
positive regulation of immunoglobulin production (GO:0002639)	0.00164539	0.313837	14.1942	IL6;RBP4;TFRC
positive regulation of multicellular organismal process (GO:0051240)	0.00229528	0.313837	3.67934	IL6;RGCC;TFRC;GLIPR2;FST;SERPINE1;LEPR;S100A13
glucose homeostasis (GO:0042593)	0.0026764	0.313837	7.42364	RBP4;IL6;LEPR;NUCKS1
gene expression (GO:0010467)	0.00278306	0.313837	3.56103	DDX39A;NOVA1;RPL22;RPL37A;RPL36;RPL36A;POLR2G;POLR2H
positive regulation of epithelial to mesenchymal transition (GO:0010718)	0.00278923	0.313837	11.6424	IL6;RGCC;GLIPR2
SRP-dependent cotranslational protein targeting to membrane (GO:0006614)	0.00315497	0.313837	7.07692	RPL22;RPL37A;RPL36;RPL36A
regulation of endothelial cell apoptotic process (GO:2000351)	0.00318665	0.313837	11.0734	RAMP2;RGCC;SERPINE1
positive regulation of cellular component biogenesis (GO:0044089)	0.00341482	0.313837	6.91538	RGCC;TFRC;SDC4;CHMP2A
regulation of heart contraction (GO:0008016)	0.00355004	0.313837	6.83734	KCNG2;S100A1;FXYD7;TRDN
cytoplasmic translation (GO:0002181)	0.00355004	0.313837	6.83734	RPL22;RPL37A;RPL36;RPL36A
cotranslational protein targeting to membrane (GO:0006613)	0.00368886	0.313837	6.76103	RPL22;RPL37A;RPL36;RPL36A
positive regulation of exosomal secretion (GO:1903543)	0.00441855	0.313837	23.1387	SDC4;CHMP2A
rRNA metabolic process (GO:0016072)	0.00473242	0.313837	4.8657	EXOSC10;RPL22;RPL37A;RPL36;RPL36A
regulation of activin receptor signaling pathway (GO:0032925)	0.0050277	0.313837	21.4848	FST;CSNK2B
protein targeting to ER (GO:0045047)	0.00510734	0.313837	6.14359	RPL22;RPL37A;RPL36;RPL36A
rRNA processing (GO:0006364)	0.00622672	0.313837	4.54457	EXOSC10;RPL22;RPL37A;RPL36;RPL36A
positive regulation of extracellular matrix organization (GO:1903055)	0.00635445	0.313837	18.7973	IL6;RGCC
nuclear-transcribed mRNA catabolic process, nonsense-mediated decay (GO:0000184)	0.00706727	0.313837	5.57713	RPL22;RPL37A;RPL36;RPL36A
regulation of collagen biosynthetic process (GO:0032965)	0.00707105	0.313837	17.6907	IL6;RGCC
regulation of exosomal secretion (GO:1903541)	0.00707105	0.313837	17.6907	SDC4;CHMP2A
negative regulation of DNA recombination at telomere (GO:0048239)	0.00942775	0.313837	15.0348	POLR2G;POLR2H
regulation of DNA recombination at telomere (GO:0072695)	0.00942775	0.313837	15.0348	POLR2G;POLR2H
ribosome biogenesis (GO:0042254)	0.00954127	0.313837	4.07889	EXOSC10;RPL22;RPL37A;RPL36;RPL36A
positive regulation of epithelial cell apoptotic process (GO:1904037)	0.0102807	0.313837	14.3182	IL6;RGCC
transcription elongation from RNA polymerase II promoter (GO:0006368)	0.0103103	0.313837	7.08564	POLR2G;RTF1;POLR2H
regulation of translational initiation (GO:0006446)	0.0107342	0.313837	6.97628	EIF5B;EIF4EBP3;POLR2G
DNA-templated transcription, elongation (GO:0006354)	0.011168	0.313837	6.87023	POLR2G;RTF1;POLR2H
ncRNA processing (GO:0034470)	0.0114702	0.313837	3.88981	EXOSC10;RPL22;RPL37A;RPL36;RPL36A
carbohydrate homeostasis (GO:0033500)	0.0116119	0.313837	6.76735	RBP4;IL6;LEPR
defense response to Gram-negative bacterium (GO:0050829)	0.013004	0.313837	6.47634	IL6;SERPINE1;BPI
chaperone cofactor-dependent protein refolding (GO:0051085)	0.0130348	0.313837	12.5265	HSPA6;HSPA2
positive regulation of viral transcription (GO:0050434)	0.0130348	0.313837	12.5265	POLR2G;POLR2H
negative regulation of endothelial cell apoptotic process (GO:2000352)	0.0140164	0.313837	12.0248	RAMP2;SERPINE1
cellular response to unfolded protein (GO:0034620)	0.0140164	0.313837	12.0248	HSPA6;HSPA2
regulation of epithelial to mesenchymal transition (GO:0010717)	0.0144875	0.313837	6.20924	IL6;RGCC;GLIPR2
regulation of T cell proliferation (GO:0042129)	0.0144875	0.313837	6.20924	IL6;TFRC;SDC4
regulation of immunoglobulin production (GO:0002637)	0.0150291	0.313837	11.5618	IL6;RBP4
nitrogen compound transport (GO:0071705)	0.0157365	0.313837	4.3668	SLC7A4;RAMP2;CHMP2A;HBB
neutrophil mediated immunity (GO:0002446)	0.01712	0.313837	2.56429	CD63;IL6;FTH1;CSNK2B;HSPA6;HBB;BPI;RAB9B
regulation of macrophage activation (GO:0043030)	0.0171456	0.313837	10.7348	IL6;BPI
regulation of interleukin-8 production (GO:0032677)	0.0171648	0.313837	5.80975	IL6;SERPINE1;BPI
'de novo' posttranslational protein folding (GO:0051084)	0.0182486	0.313837	10.3642	HSPA6;HSPA2
positive regulation of leukocyte cell-cell adhesion (GO:1903039)	0.0182486	0.313837	10.3642	IL6;SKAP1
vascular transport (GO:0010232)	0.0188949	0.313837	5.59372	TFRC;KCNJ8;LEPR
cellular macromolecule biosynthetic process (GO:0034645)	0.0192608	0.313837	2.97656	RPL22;RPL37A;RPL36;RPL36A;POLR2G;POLR2H
7-methylguanosine mRNA capping (GO:0006370)	0.0193808	0.313837	10.0182	POLR2G;POLR2H
7-methylguanosine RNA capping (GO:0009452)	0.0193808	0.313837	10.0182	POLR2G;POLR2H
cellular response to topologically incorrect protein (GO:0035967)	0.0193808	0.313837	10.0182	HSPA6;HSPA2
transport across blood-brain barrier (GO:0150104)	0.0201002	0.313837	5.45838	TFRC;KCNJ8;LEPR
negative regulation of blood vessel endothelial cell migration (GO:0043537)	0.0217312	0.313837	9.3911	RGCC;CSNK2B
post-Golgi vesicle-mediated transport (GO:0006892)	0.0219859	0.313837	5.26718	FTH1;ARL3;CHMP2A
cellular protein metabolic process (GO:0044267)	0.0223922	0.313837	2.61556	IL6;FBXO2;RPL22;PENK;RPL37A;RPL36;RPL36A
regulation of blood circulation (GO:1903522)	0.0229485	0.313837	9.10606	KCNG2;S100A1
peptide biosynthetic process (GO:0043043)	0.023661	0.313837	3.83797	RPL22;RPL37A;RPL36;RPL36A
transition metal ion transport (GO:0000041)	0.0241934	0.313837	8.83779	TFRC;FTH1
positive regulation of peptidyl-serine phosphorylation (GO:0033138)	0.0246456	0.313837	5.03206	IL6;TFRC;TXN
negative regulation of epithelial cell apoptotic process (GO:1904036)	0.0254653	0.313837	8.58485	RAMP2;SERPINE1
positive regulation of exocytosis (GO:0045921)	0.0254653	0.313837	8.58485	SDC4;CHMP2A
cellular transition metal ion homeostasis (GO:0046916)	0.0267493	0.313837	4.869	MT1A;TFRC;FTH1
negative regulation of endothelial cell migration (GO:0010596)	0.0267639	0.313837	8.34596	RGCC;CSNK2B
positive regulation of production of molecular mediator of immune response (GO:0002702)	0.0267639	0.313837	8.34596	IL6;RBP4
regulation of exit from mitosis (GO:0007096)	0.0280888	0.313837	8.11998	RGCC;CDC26
regulation of peptidyl-serine phosphorylation (GO:0033135)	0.0282037	0.313837	4.76601	IL6;TFRC;TXN
defense response to bacterium (GO:0042742)	0.0308081	0.313837	3.52308	IL6;GSDMA;SERPINE1;BPI
regulation of viral transcription (GO:0046782)	0.0308159	0.313837	7.7028	POLR2G;POLR2H
heart contraction (GO:0060047)	0.0308159	0.313837	7.7028	TNNC1;TRDN
nucleic acid-templated transcription (GO:0097659)	0.0322172	0.313837	7.50985	POLR2G;POLR2H
monocyte chemotaxis (GO:0002548)	0.0322172	0.313837	7.50985	IL6;CCL26
regulation of insulin secretion (GO:0050796)	0.0328142	0.313837	4.48152	KCNG2;RBP4;IL6
negative regulation of cardiac muscle cell proliferation (GO:0060044)	0.0330572	0.313837	37.3346	RBP4
alditol phosphate metabolic process (GO:0052646)	0.0330572	0.313837	37.3346	ACP6
regulation of astrocyte activation (GO:0061888)	0.0330572	0.313837	37.3346	IL6
negative regulation of heterochromatin assembly (GO:0031452)	0.0330572	0.313837	37.3346	TET1
regulation of cellular response to vascular endothelial growth factor stimulus (GO:1902547)	0.0330572	0.313837	37.3346	CD63
cell fate commitment involved in formation of primary germ layer (GO:0060795)	0.0330572	0.313837	37.3346	RTF1
negative regulation of plasminogen activation (GO:0010757)	0.0330572	0.313837	37.3346	SERPINE1
regulation of interleukin-1 alpha production (GO:0032650)	0.0330572	0.313837	37.3346	S100A13
nuclear retention of pre-mRNA at the site of transcription (GO:0071033)	0.0330572	0.313837	37.3346	EXOSC10
regulation of phosphatidylinositol dephosphorylation (GO:0060304)	0.0330572	0.313837	37.3346	MTMR4
positive regulation by host of viral genome replication (GO:0044829)	0.0330572	0.313837	37.3346	NUCKS1
female genitalia development (GO:0030540)	0.0330572	0.313837	37.3346	RBP4
regulation of type B pancreatic cell apoptotic process (GO:2000674)	0.0330572	0.313837	37.3346	IL6
positive regulation of glial cell proliferation (GO:0060252)	0.0330572	0.313837	37.3346	IL6
intracellular sequestering of iron ion (GO:0006880)	0.0330572	0.313837	37.3346	FTH1
membrane repolarization during ventricular cardiac muscle cell action potential (GO:0098915)	0.0330572	0.313837	37.3346	KCNJ8
positive regulation of receptor-mediated endocytosis (GO:0048260)	0.0350936	0.313837	7.15152	CD63;SERPINE1
positive regulation of chemotaxis (GO:0050921)	0.0365678	0.313837	6.98485	IL6;CCL26
negative regulation of cardiac muscle tissue growth (GO:0055022)	0.0395373	0.313837	29.8662	RBP4
adiponectin-activated signaling pathway (GO:0033211)	0.0395373	0.313837	29.8662	CSNK2B
amylin receptor signaling pathway (GO:0097647)	0.0395373	0.313837	29.8662	RAMP2
negative regulation of ERAD pathway (GO:1904293)	0.0395373	0.313837	29.8662	UBXN1
regulation of centriole elongation (GO:1903722)	0.0395373	0.313837	29.8662	CHMP2A
cellular heat acclimation (GO:0070370)	0.0395373	0.313837	29.8662	HSPA6
regulation of extracellular exosome assembly (GO:1903551)	0.0395373	0.313837	29.8662	SDC4
regulation of glucagon secretion (GO:0070092)	0.0395373	0.313837	29.8662	IL6
cellular response to X-ray (GO:0071481)	0.0395373	0.313837	29.8662	NUCKS1
regulation of interleukin-1-mediated signaling pathway (GO:2000659)	0.0395373	0.313837	29.8662	IL6
nuclear polyadenylation-dependent ncRNA catabolic process (GO:0071046)	0.0395373	0.313837	29.8662	EXOSC10
nuclear polyadenylation-dependent rRNA catabolic process (GO:0071035)	0.0395373	0.313837	29.8662	EXOSC10
nuclear polyadenylation-dependent tRNA catabolic process (GO:0071038)	0.0395373	0.313837	29.8662	EXOSC10
regulation of peptidyl-cysteine S-nitrosylation (GO:2000169)	0.0395373	0.313837	29.8662	TXN
positive regulation of activin receptor signaling pathway (GO:0032927)	0.0395373	0.313837	29.8662	CSNK2B
positive regulation of cell-cell adhesion mediated by integrin (GO:0033634)	0.0395373	0.313837	29.8662	SKAP1
release of sequestered calcium ion into cytosol by sarcoplasmic reticulum (GO:0014808)	0.0395373	0.313837	29.8662	TRDN
heat acclimation (GO:0010286)	0.0395373	0.313837	29.8662	HSPA6
response to peptidoglycan (GO:0032494)	0.0395373	0.313837	29.8662	IL6
T-helper 17 cell lineage commitment (GO:0072540)	0.0395373	0.313837	29.8662	IL6
tRNA surveillance (GO:0106354)	0.0395373	0.313837	29.8662	EXOSC10
type B pancreatic cell proliferation (GO:0044342)	0.0395373	0.313837	29.8662	ANGPTL8
positive regulation of Wnt signaling pathway, planar cell polarity pathway (GO:2000096)	0.0395373	0.313837	29.8662	RSPO3
morphogenesis of an endothelium (GO:0003159)	0.0395373	0.313837	29.8662	CSNK2B
regulation of DNA binding (GO:0051101)	0.0395865	0.313837	6.67374	CSNK2B;TXN
receptor internalization (GO:0031623)	0.0426963	0.313837	6.3891	RAMP2;TFRC
response to hydrogen peroxide (GO:0042542)	0.0426963	0.313837	6.3891	IL6;HBB
response to unfolded protein (GO:0006986)	0.0426963	0.313837	6.3891	HSPA6;HSPA2
positive regulation of angiogenesis (GO:0045766)	0.0431358	0.313837	4.00318	RAMP2;S100A1;SERPINE1
neutrophil degranulation (GO:0043312)	0.0433585	0.313837	2.25496	CD63;FTH1;CSNK2B;HSPA6;HBB;BPI;RAB9B
iron ion transport (GO:0006826)	0.0442845	0.313837	6.25568	TFRC;FTH1
neutrophil activation involved in immune response (GO:0002283)	0.0449849	0.313837	2.23563	CD63;FTH1;CSNK2B;HSPA6;HBB;BPI;RAB9B
negative regulation of cell cycle phase transition (GO:1901988)	0.0459743	0.313837	24.8872	RGCC
regulation of bone remodeling (GO:0046850)	0.0459743	0.313837	24.8872	LEPR
regulation of cardiac muscle cell membrane potential (GO:0086036)	0.0459743	0.313837	24.8872	TRDN
calcitonin family receptor signaling pathway (GO:0097646)	0.0459743	0.313837	24.8872	RAMP2
regulation of cilium beat frequency (GO:0003356)	0.0459743	0.313837	24.8872	DNAH11
regulation of extracellular matrix assembly (GO:1901201)	0.0459743	0.313837	24.8872	RGCC
cytochrome complex assembly (GO:0017004)	0.0459743	0.313837	24.8872	SURF1
oxygen transport (GO:0015671)	0.0459743	0.313837	24.8872	HBB
photoreceptor cell differentiation (GO:0046530)	0.0459743	0.313837	24.8872	ARL3
polyadenylation-dependent snoRNA 3'-end processing (GO:0071051)	0.0459743	0.313837	24.8872	EXOSC10
release of sequestered calcium ion into cytosol by endoplasmic reticulum (GO:1903514)	0.0459743	0.313837	24.8872	TRDN
positive regulation of gliogenesis (GO:0014015)	0.0459743	0.313837	24.8872	IL6
heart trabecula formation (GO:0060347)	0.0459743	0.313837	24.8872	RBP4
positive regulation of integrin-mediated signaling pathway (GO:2001046)	0.0459743	0.313837	24.8872	CD63
intermembrane lipid transfer (GO:0120009)	0.0459743	0.313837	24.8872	TTPA
T-helper 17 cell differentiation (GO:0072539)	0.0459743	0.313837	24.8872	IL6
membrane invagination (GO:0010324)	0.0459743	0.313837	24.8872	CHMP2A
vascular associated smooth muscle cell development (GO:0097084)	0.0459743	0.313837	24.8872	RAMP2
protein localization to ciliary membrane (GO:1903441)	0.0459743	0.313837	24.8872	ARL3
cellular response to lipopolysaccharide (GO:0071222)	0.0468963	0.313837	3.86553	IL6;SERPINE1;BPI
macroautophagy (GO:0016236)	0.0468963	0.313837	3.86553	LIX1;CSNK2B;CHMP2A
cilium movement (GO:0003341)	0.0475255	0.313837	6.00485	DNAH11;TEKT2
sprouting angiogenesis (GO:0002040)	0.0475255	0.313837	6.00485	RAMP2;RSPO3
regulation of angiogenesis (GO:0045765)	0.0478366	0.313837	3.0409	IL6;RAMP2;RGCC;SERPINE1
positive regulation of B cell activation (GO:0050871)	0.0491777	0.313837	5.88681	IL6;TFRC
positive regulation of leukocyte chemotaxis (GO:0002690)	0.0508504	0.313837	5.77331	IL6;SERPINE1
unsaturated fatty acid metabolic process (GO:0033559)	0.0508504	0.313837	5.77331	EPHX1;PTGS1
negative regulation of mitochondrial fusion (GO:0010637)	0.0523685	0.313837	21.3308	TFRC
regulation of extracellular matrix constituent secretion (GO:0003330)	0.0523685	0.313837	21.3308	RGCC
negative regulation of response to reactive oxygen species (GO:1901032)	0.0523685	0.313837	21.3308	TXN
positive regulation of adaptive immune response (GO:0002821)	0.0523685	0.313837	21.3308	SKAP1
regulation of striated muscle tissue development (GO:0016202)	0.0523685	0.313837	21.3308	MRTFB
regulation of vascular wound healing (GO:0061043)	0.0523685	0.313837	21.3308	SERPINE1
positive regulation of extracellular matrix disassembly (GO:0090091)	0.0523685	0.313837	21.3308	IL6
glyoxylate metabolic process (GO:0046487)	0.0523685	0.313837	21.3308	HYI
mast cell activation involved in immune response (GO:0002279)	0.0523685	0.313837	21.3308	S100A13
mast cell degranulation (GO:0043303)	0.0523685	0.313837	21.3308	S100A13
T-helper cell lineage commitment (GO:0002295)	0.0523685	0.313837	21.3308	IL6
positive regulation of ryanodine-sensitive calcium-release channel activity (GO:0060316)	0.0523685	0.313837	21.3308	TRDN
positive regulation of T-helper 2 cell cytokine production (GO:2000553)	0.0523685	0.313837	21.3308	IL6
vascular associated smooth muscle cell differentiation (GO:0035886)	0.0523685	0.313837	21.3308	RAMP2
ventricular cardiac muscle cell membrane repolarization (GO:0099625)	0.0523685	0.313837	21.3308	KCNJ8
myeloid leukocyte mediated immunity (GO:0002444)	0.0523685	0.313837	21.3308	IL6
regulation of blood vessel endothelial cell migration (GO:0043535)	0.0525435	0.313837	5.66409	RGCC;CSNK2B
regulation of cardiac conduction (GO:1903779)	0.0525435	0.313837	5.66409	FXYD7;TRDN
regulation of gene silencing by RNA (GO:0060966)	0.0525435	0.313837	5.66409	POLR2G;POLR2H
regulation of posttranscriptional gene silencing (GO:0060147)	0.0525435	0.313837	5.66409	POLR2G;POLR2H
interstrand cross-link repair (GO:0036297)	0.0525435	0.313837	5.66409	FANCI;NUCKS1
negative regulation of DNA recombination (GO:0045910)	0.0559892	0.313837	5.45758	POLR2G;POLR2H
arachidonic acid metabolic process (GO:0019369)	0.0559892	0.313837	5.45758	EPHX1;PTGS1
renal system development (GO:0072001)	0.0559892	0.313837	5.45758	RBP4;ARL3
icosanoid metabolic process (GO:0006690)	0.0559892	0.313837	5.45758	EPHX1;PTGS1
translation (GO:0006412)	0.056007	0.313837	2.88	RPL22;RPL37A;RPL36;RPL36A
receptor metabolic process (GO:0043112)	0.057741	0.313837	5.35985	RAMP2;TFRC
cellular iron ion homeostasis (GO:0006879)	0.057741	0.313837	5.35985	TFRC;FTH1
negative regulation of bone resorption (GO:0045779)	0.0587201	0.313837	18.6635	IL6
negative regulation of fibrinolysis (GO:0051918)	0.0587201	0.313837	18.6635	SERPINE1
basement membrane assembly (GO:0070831)	0.0587201	0.313837	18.6635	RAMP2
negative regulation of lipid localization (GO:1905953)	0.0587201	0.313837	18.6635	IL6
regulation of glial cell proliferation (GO:0060251)	0.0587201	0.313837	18.6635	IL6
cellular response to leptin stimulus (GO:0044320)	0.0587201	0.313837	18.6635	LEPR
cilium movement involved in cell motility (GO:0060294)	0.0587201	0.313837	18.6635	TEKT2
nuclear RNA surveillance (GO:0071027)	0.0587201	0.313837	18.6635	EXOSC10
organic cyclic compound catabolic process (GO:1901361)	0.0587201	0.313837	18.6635	HSD11B1
endosome to melanosome transport (GO:0035646)	0.0587201	0.313837	18.6635	CD63
endosome to pigment granule transport (GO:0043485)	0.0587201	0.313837	18.6635	CD63
exonucleolytic trimming involved in rRNA processing (GO:0000459)	0.0587201	0.313837	18.6635	EXOSC10
exonucleolytic trimming to generate mature 3'-end of 5.8S rRNA from tricistronic rRNA transcript (SSU-rRNA, 5.8S rRNA, LSU-rRNA) (GO:0000467)	0.0587201	0.313837	18.6635	EXOSC10
regulation of Wnt signaling pathway, planar cell polarity pathway (GO:2000095)	0.0587201	0.313837	18.6635	RSPO3
positive regulation of extracellular matrix assembly (GO:1901203)	0.0587201	0.313837	18.6635	RGCC
response to leptin (GO:0044321)	0.0587201	0.313837	18.6635	LEPR
inositol metabolic process (GO:0006020)	0.0587201	0.313837	18.6635	ISYNA1
mast cell mediated immunity (GO:0002448)	0.0587201	0.313837	18.6635	S100A13
RNA metabolic process (GO:0016070)	0.0601865	0.313837	3.47669	NOVA1;POLR2G;POLR2H
transcription, DNA-templated (GO:0006351)	0.0615742	0.313837	2.7861	POLR2G;RTF1;POLR2H;TAF3
positive regulation of interleukin-8 production (GO:0032757)	0.063109	0.313837	5.08654	IL6;SERPINE1
iron ion homeostasis (GO:0055072)	0.063109	0.313837	5.08654	TFRC;FTH1
negative regulation of inflammatory response to antigenic stimulus (GO:0002862)	0.063479	0.313837	3.39775	GPR176;IL6;RAMP2
regulation of inflammatory response to antigenic stimulus (GO:0002861)	0.0645947	0.313837	3.37222	GPR176;IL6;RAMP2
positive regulation of interleukin-1 production (GO:0032732)	0.0649347	0.313837	5.00152	IL6;S100A13
negative regulation of cell adhesion mediated by integrin (GO:0033629)	0.0650295	0.313837	16.589	SERPINE1
adherens junction assembly (GO:0034333)	0.0650295	0.313837	16.589	RAMP2
negative regulation of cell-cell adhesion mediated by cadherin (GO:2000048)	0.0650295	0.313837	16.589	RGCC
negative regulation of inclusion body assembly (GO:0090084)	0.0650295	0.313837	16.589	HSPA2
regulation of cell activation (GO:0050865)	0.0650295	0.313837	16.589	IL6
regulation of cell-cell adhesion mediated by integrin (GO:0033632)	0.0650295	0.313837	16.589	SKAP1
regulation of cilium movement (GO:0003352)	0.0650295	0.313837	16.589	DNAH11
regulation of hydrogen peroxide-induced cell death (GO:1903205)	0.0650295	0.313837	16.589	TXN
nuclear mRNA surveillance (GO:0071028)	0.0650295	0.313837	16.589	EXOSC10
regulation of phospholipid metabolic process (GO:1903725)	0.0650295	0.313837	16.589	MTMR4
endodermal cell fate commitment (GO:0001711)	0.0650295	0.313837	16.589	RTF1
endothelial tube morphogenesis (GO:0061154)	0.0650295	0.313837	16.589	CSNK2B
ESCRT complex disassembly (GO:1904896)	0.0650295	0.313837	16.589	CHMP2A
ESCRT III complex disassembly (GO:1904903)	0.0650295	0.313837	16.589	CHMP2A
positive regulation of coagulation (GO:0050820)	0.0650295	0.313837	16.589	SERPINE1
positive regulation of hemostasis (GO:1900048)	0.0650295	0.313837	16.589	SERPINE1
rRNA 3'-end processing (GO:0031125)	0.0650295	0.313837	16.589	EXOSC10
sarcoplasmic reticulum calcium ion transport (GO:0070296)	0.0650295	0.313837	16.589	TRDN
leptin-mediated signaling pathway (GO:0033210)	0.0650295	0.313837	16.589	LEPR
myeloid dendritic cell differentiation (GO:0043011)	0.0650295	0.313837	16.589	BATF3
protein insertion into ER membrane by stop-transfer membrane-anchor sequence (GO:0045050)	0.0650295	0.313837	16.589	EMC9
negative regulation of peptidase activity (GO:0010466)	0.066778	0.313837	4.91927	UBXN1;SERPINE1
positive regulation of viral process (GO:0048524)	0.066778	0.313837	4.91927	POLR2G;POLR2H
transcription initiation from RNA polymerase II promoter (GO:0006367)	0.0679962	0.313837	3.29788	POLR2G;POLR2H;TAF3
diterpenoid metabolic process (GO:0016101)	0.0686386	0.313837	4.83969	RBP4;SDC4
negative regulation of bone remodeling (GO:0046851)	0.071297	0.313837	14.9293	IL6
regulation of ERAD pathway (GO:1904292)	0.071297	0.313837	14.9293	UBXN1
regulation of inclusion body assembly (GO:0090083)	0.071297	0.313837	14.9293	HSPA2
cyclooxygenase pathway (GO:0019371)	0.071297	0.313837	14.9293	PTGS1
regulation of mitochondrial fusion (GO:0010635)	0.071297	0.313837	14.9293	TFRC
positive regulation by host of viral process (GO:0044794)	0.071297	0.313837	14.9293	NUCKS1
regulation of T-helper 2 cell cytokine production (GO:2000551)	0.071297	0.313837	14.9293	IL6
glucocorticoid biosynthetic process (GO:0006704)	0.071297	0.313837	14.9293	HSD11B1
glucocorticoid metabolic process (GO:0008211)	0.071297	0.313837	14.9293	HSD11B1
response to corticosteroid (GO:0031960)	0.071297	0.313837	14.9293	IL6
positive regulation of integrin activation (GO:0033625)	0.071297	0.313837	14.9293	SKAP1
positive regulation of non-canonical Wnt signaling pathway (GO:2000052)	0.071297	0.313837	14.9293	RSPO3
positive regulation of production of miRNAs involved in gene silencing by miRNA (GO:1903800)	0.071297	0.313837	14.9293	IL6
T cell chemotaxis (GO:0010818)	0.071297	0.313837	14.9293	CCL26
positive regulation of viral release from host cell (GO:1902188)	0.071297	0.313837	14.9293	CHMP2A
negative regulation of activin receptor signaling pathway (GO:0032926)	0.071297	0.313837	14.9293	FST
receptor-mediated endocytosis (GO:0006898)	0.0714779	0.313837	3.22672	RAMP2;TFRC;HBB
neuron development (GO:0048666)	0.0714779	0.313837	3.22672	IL6;GPRIN1;ARL3
positive regulation of T cell proliferation (GO:0042102)	0.0724107	0.313837	4.68797	IL6;TFRC
regulation of gene silencing by miRNA (GO:0060964)	0.0743215	0.313837	4.61562	POLR2G;POLR2H
positive regulation of cytokine production (GO:0001819)	0.0750689	0.313837	2.29457	IL6;RGCC;SERPINE1;S100A13;POLR2H
regulation of astrocyte differentiation (GO:0048710)	0.0775227	0.313837	13.5714	IL6
negative regulation of hemostasis (GO:1900047)	0.0775227	0.313837	13.5714	SERPINE1
regulation of cell communication by electrical coupling involved in cardiac conduction (GO:1901844)	0.0775227	0.313837	13.5714	TRDN
negative regulation of production of miRNAs involved in gene silencing by miRNA (GO:1903799)	0.0775227	0.313837	13.5714	IL6
negative regulation of release of sequestered calcium ion into cytosol (GO:0051280)	0.0775227	0.313837	13.5714	TRDN
regulation of feeding behavior (GO:0060259)	0.0775227	0.313837	13.5714	LEPR
negative regulation of ryanodine-sensitive calcium-release channel activity (GO:0060315)	0.0775227	0.313837	13.5714	TRDN
negative regulation of vascular permeability (GO:0043116)	0.0775227	0.313837	13.5714	RAMP2
regulation of leukocyte cell-cell adhesion (GO:1903037)	0.0775227	0.313837	13.5714	SKAP1
regulation of muscle system process (GO:0090257)	0.0775227	0.313837	13.5714	TNNC1
regulation of nucleobase-containing compound metabolic process (GO:0019219)	0.0775227	0.313837	13.5714	NOVA1
regulation of plasminogen activation (GO:0010755)	0.0775227	0.313837	13.5714	SERPINE1
endoplasmic reticulum membrane organization (GO:0090158)	0.0775227	0.313837	13.5714	TRDN
regulation of sequestering of calcium ion (GO:0051282)	0.0775227	0.313837	13.5714	TRDN
exit from mitosis (GO:0010458)	0.0775227	0.313837	13.5714	CHMP2A
gas transport (GO:0015669)	0.0775227	0.313837	13.5714	HBB
glycine metabolic process (GO:0006544)	0.0775227	0.313837	13.5714	GLYAT
replicative senescence (GO:0090399)	0.0775227	0.313837	13.5714	SERPINE1
inorganic ion transmembrane transport (GO:0098660)	0.0775227	0.313837	13.5714	KCNJ8
positive regulation of neuroinflammatory response (GO:0150078)	0.0775227	0.313837	13.5714	IL6
smooth muscle cell differentiation (GO:0051145)	0.0775227	0.313837	13.5714	MRTFB
sno(s)RNA 3'-end processing (GO:0031126)	0.0775227	0.313837	13.5714	EXOSC10
positive regulation of protein maturation (GO:1903319)	0.0775227	0.313837	13.5714	ANGPTL8
regulation of cytokine production (GO:0001817)	0.0799062	0.320892	3.07197	IL6;RGCC;S100A13
membrane organization (GO:0061024)	0.0799552	0.320892	2.53756	TFRC;TTPA;CHMP2A;TRDN
snRNA transcription by RNA polymerase II (GO:0042795)	0.0801493	0.320892	4.41132	POLR2G;POLR2H
nucleic acid metabolic process (GO:0090304)	0.0821227	0.320975	4.34717	POLR2G;POLR2H
snRNA transcription (GO:0009301)	0.0821227	0.320975	4.34717	POLR2G;POLR2H
negative regulation of hydrogen peroxide-induced cell death (GO:1903206)	0.083707	0.320975	12.4398	TXN
regulation of cell communication by electrical coupling (GO:0010649)	0.083707	0.320975	12.4398	TRDN
regulation of fibrinolysis (GO:0051917)	0.083707	0.320975	12.4398	SERPINE1
regulation of leukocyte adhesion to vascular endothelial cell (GO:1904994)	0.083707	0.320975	12.4398	IL6
regulation of receptor signaling pathway via STAT (GO:1904892)	0.083707	0.320975	12.4398	IL6
glucan biosynthetic process (GO:0009250)	0.083707	0.320975	12.4398	GYS2
glycogen biosynthetic process (GO:0005978)	0.083707	0.320975	12.4398	GYS2
response to nitric oxide (GO:0071731)	0.083707	0.320975	12.4398	TXN
positive regulation of nuclear-transcribed mRNA poly(A) tail shortening (GO:0060213)	0.083707	0.320975	12.4398	POLR2G
mature B cell differentiation involved in immune response (GO:0002313)	0.083707	0.320975	12.4398	IL6
transcription-coupled nucleotide-excision repair (GO:0006283)	0.0861141	0.321926	4.22429	POLR2G;POLR2H
regulation of peptide hormone secretion (GO:0090276)	0.0881315	0.321926	4.1654	KCNG2;IL6
RNA splicing, via transesterification reactions with bulged adenosine as nucleophile (GO:0000377)	0.0885812	0.321926	2.44397	DDX39A;NOVA1;POLR2G;POLR2H
negative regulation of coagulation (GO:0050819)	0.0898501	0.321926	11.4824	SERPINE1
regulation of DNA methylation-dependent heterochromatin assembly (GO:0090308)	0.0898501	0.321926	11.4824	TET1
negative regulation of smooth muscle cell migration (GO:0014912)	0.0898501	0.321926	11.4824	SERPINE1
negative regulation of translational initiation (GO:0045947)	0.0898501	0.321926	11.4824	EIF4EBP3
regulation of histone methylation (GO:0031060)	0.0898501	0.321926	11.4824	TET1
regulation of integrin-mediated signaling pathway (GO:2001044)	0.0898501	0.321926	11.4824	CD63
regulation of lipase activity (GO:0060191)	0.0898501	0.321926	11.4824	ANGPTL8
renal absorption (GO:0070293)	0.0898501	0.321926	11.4824	HBB
heart process (GO:0003015)	0.0898501	0.321926	11.4824	TRDN
histone H3-K4 trimethylation (GO:0080182)	0.0898501	0.321926	11.4824	TET3
response to X-ray (GO:0010165)	0.0898501	0.321926	11.4824	NUCKS1
steroid catabolic process (GO:0006706)	0.0898501	0.321926	11.4824	HSD11B1
T-helper cell differentiation (GO:0042093)	0.0898501	0.321926	11.4824	IL6
positive regulation of type 2 immune response (GO:0002830)	0.0898501	0.321926	11.4824	IL6
myeloid dendritic cell activation (GO:0001773)	0.0898501	0.321926	11.4824	BATF3
fibroblast growth factor receptor signaling pathway (GO:0008543)	0.0901629	0.321926	4.10814	POLR2G;POLR2H
positive regulation of lymphocyte proliferation (GO:0050671)	0.0901629	0.321926	4.10814	IL6;TFRC
positive regulation of T cell activation (GO:0050870)	0.0901629	0.321926	4.10814	IL6;TFRC
positive regulation of cell differentiation (GO:0045597)	0.0955892	0.322507	2.37577	IL6;RGCC;GLIPR2;ADIRF
acute-phase response (GO:0006953)	0.0959524	0.322507	10.6617	IL6
negative regulation of leukocyte activation (GO:0002695)	0.0959524	0.322507	10.6617	BPI
regulation of dephosphorylation (GO:0035303)	0.0959524	0.322507	10.6617	MTMR4
negative regulation of protein processing (GO:0010955)	0.0959524	0.322507	10.6617	SERPINE1
regulation of extracellular matrix disassembly (GO:0010715)	0.0959524	0.322507	10.6617	IL6
regulation of integrin activation (GO:0033623)	0.0959524	0.322507	10.6617	SKAP1
regulation of microglial cell activation (GO:1903978)	0.0959524	0.322507	10.6617	IL6
regulation of non-canonical Wnt signaling pathway (GO:2000050)	0.0959524	0.322507	10.6617	RSPO3
regulation of nuclear-transcribed mRNA poly(A) tail shortening (GO:0060211)	0.0959524	0.322507	10.6617	POLR2G
photoreceptor cell development (GO:0042461)	0.0959524	0.322507	10.6617	ARL3
positive regulation of acute inflammatory response (GO:0002675)	0.0959524	0.322507	10.6617	IL6
fibrinolysis (GO:0042730)	0.0959524	0.322507	10.6617	SERPINE1
positive regulation of heterotypic cell-cell adhesion (GO:0034116)	0.0959524	0.322507	10.6617	SKAP1
histone mRNA catabolic process (GO:0071044)	0.0959524	0.322507	10.6617	EXOSC10
positive regulation of sprouting angiogenesis (GO:1903672)	0.0959524	0.322507	10.6617	S100A1
membrane repolarization during cardiac muscle cell action potential (GO:0086013)	0.0959524	0.322507	10.6617	KCNJ8
modulation by host of viral genome replication (GO:0044827)	0.0959524	0.322507	10.6617	NUCKS1
prostanoid biosynthetic process (GO:0046457)	0.0959524	0.322507	10.6617	PTGS1
regulation of fat cell differentiation (GO:0045598)	0.100522	0.327709	3.84382	IL6;ADIRF
basement membrane organization (GO:0071711)	0.102014	0.327709	9.95038	RAMP2
negative regulation of macrophage activation (GO:0043031)	0.102014	0.327709	9.95038	BPI
regulation of isotype switching (GO:0045191)	0.102014	0.327709	9.95038	TFRC
odontogenesis of dentin-containing tooth (GO:0042475)	0.102014	0.327709	9.95038	ROGDI
polyol biosynthetic process (GO:0046173)	0.102014	0.327709	9.95038	ISYNA1
positive regulation by host of viral transcription (GO:0043923)	0.102014	0.327709	9.95038	NUCKS1
eosinophil chemotaxis (GO:0048245)	0.102014	0.327709	9.95038	CCL26
eosinophil migration (GO:0072677)	0.102014	0.327709	9.95038	CCL26
positive regulation of collagen biosynthetic process (GO:0032967)	0.102014	0.327709	9.95038	RGCC
positive regulation of endothelial cell apoptotic process (GO:2000353)	0.102014	0.327709	9.95038	RGCC
positive regulation of immunoglobulin mediated immune response (GO:0002891)	0.102014	0.327709	9.95038	TFRC
positive regulation of isotype switching (GO:0045830)	0.102014	0.327709	9.95038	TFRC
positive regulation of leukocyte adhesion to vascular endothelial cell (GO:1904996)	0.102014	0.327709	9.95038	IL6
serine family amino acid metabolic process (GO:0009069)	0.102014	0.327709	9.95038	GLYAT
cellular protein-containing complex assembly (GO:0034622)	0.10342	0.330278	2.73435	CSNK2B;PSMG3;CHMP2A
DNA-templated transcription, initiation (GO:0006352)	0.10342	0.330278	2.73435	POLR2G;POLR2H;TAF3
positive regulation of protein phosphorylation (GO:0001934)	0.104353	0.33072	2.06507	IL6;TFRC;CSNK2B;LEPR;TXN
positive regulation of gene expression (GO:0010628)	0.105577	0.33072	1.90947	IL6;RAMP2;RGCC;TFRC;S100A13;POLR2H
negative regulation of chemokine production (GO:0032682)	0.108035	0.33072	9.32801	IL6
regulation of cellular response to growth factor stimulus (GO:0090287)	0.108035	0.33072	9.32801	FST
positive regulation of blood coagulation (GO:0030194)	0.108035	0.33072	9.32801	SERPINE1
positive regulation of collagen metabolic process (GO:0010714)	0.108035	0.33072	9.32801	RGCC
positive regulation of cyclin-dependent protein serine/threonine kinase activity (GO:0045737)	0.108035	0.33072	9.32801	RGCC
positive regulation of cytokine production involved in inflammatory response (GO:1900017)	0.108035	0.33072	9.32801	IL6
maturation of 5.8S rRNA (GO:0000460)	0.108035	0.33072	9.32801	EXOSC10
tail-anchored membrane protein insertion into ER membrane (GO:0071816)	0.108035	0.33072	9.32801	EMC9
midbody abscission (GO:0061952)	0.108035	0.33072	9.32801	CHMP2A
anaphase-promoting complex-dependent catabolic process (GO:0031145)	0.109036	0.33072	3.65558	PSMB3;CDC26
negative regulation of cell population proliferation (GO:0008285)	0.111535	0.33072	2.02006	RBP4;IL6;RGCC;FTH1;CSNK2B
mRNA splicing, via spliceosome (GO:0000398)	0.11255	0.33072	2.23316	DDX39A;NOVA1;POLR2G;POLR2H
negative regulation of biosynthetic process (GO:0009890)	0.114017	0.33072	8.77886	IL6
regulation of adaptive immune response (GO:0002819)	0.114017	0.33072	8.77886	SKAP1
negative regulation of fibroblast proliferation (GO:0048147)	0.114017	0.33072	8.77886	FTH1
negative regulation of interleukin-8 production (GO:0032717)	0.114017	0.33072	8.77886	BPI
cellular response to zinc ion (GO:0071294)	0.114017	0.33072	8.77886	MT1A
regulation of production of miRNAs involved in gene silencing by miRNA (GO:1903798)	0.114017	0.33072	8.77886	IL6
epithelial structure maintenance (GO:0010669)	0.114017	0.33072	8.77886	RBP4
positive regulation of cell adhesion mediated by integrin (GO:0033630)	0.114017	0.33072	8.77886	SKAP1
regulation of telomerase RNA localization to Cajal body (GO:1904872)	0.114017	0.33072	8.77886	EXOSC10
regulation of transcription by RNA polymerase I (GO:0006356)	0.114017	0.33072	8.77886	RASL11A
glycoprotein catabolic process (GO:0006516)	0.114017	0.33072	8.77886	FBXO2
rRNA catabolic process (GO:0016075)	0.114017	0.33072	8.77886	EXOSC10
interleukin-6-mediated signaling pathway (GO:0070102)	0.114017	0.33072	8.77886	IL6
positive regulation of nitric-oxide synthase activity (GO:0051000)	0.114017	0.33072	8.77886	S100A1
maintenance of gastrointestinal epithelium (GO:0030277)	0.114017	0.33072	8.77886	RBP4
T cell migration (GO:0072678)	0.114017	0.33072	8.77886	CCL26
ventricular cardiac muscle cell action potential (GO:0086005)	0.114017	0.33072	8.77886	KCNJ8
prostanoid metabolic process (GO:0006692)	0.114017	0.33072	8.77886	PTGS1
negative regulation of angiogenesis (GO:0016525)	0.115542	0.33072	3.52602	RGCC;SERPINE1
glycerophospholipid biosynthetic process (GO:0046474)	0.116093	0.33072	2.59173	ACP6;CSNK2B;MTMR4
positive regulation of macromolecule metabolic process (GO:0010604)	0.116143	0.33072	1.9929	CD63;IL6;RAMP2;RGCC;TFRC
negative regulation of immune response (GO:0050777)	0.117536	0.33072	2.57679	GPR176;IL6;RAMP2
regulation of immune response (GO:0050776)	0.118985	0.33072	2.56202	SH2D1A;ICAM3;HCST
positive regulation of inflammatory response (GO:0050729)	0.119934	0.33072	3.44462	IL6;SERPINE1
SCF-dependent proteasomal ubiquitin-dependent protein catabolic process (GO:0031146)	0.119934	0.33072	3.44462	PSMB3;FBXO2
pyroptosis (GO:0070269)	0.119958	0.33072	8.29073	GSDMA
regulation of cell-cell adhesion mediated by cadherin (GO:2000047)	0.119958	0.33072	8.29073	RGCC
carbohydrate derivative catabolic process (GO:1901136)	0.119958	0.33072	8.29073	FBXO2
negative regulation of nervous system development (GO:0051961)	0.119958	0.33072	8.29073	IL6
cellular response to copper ion (GO:0071280)	0.119958	0.33072	8.29073	MT1A
negative regulation of T cell receptor signaling pathway (GO:0050860)	0.119958	0.33072	8.29073	SH2D1A
regulation of leukocyte chemotaxis (GO:0002688)	0.119958	0.33072	8.29073	IL6
nuclear membrane organization (GO:0071763)	0.119958	0.33072	8.29073	CHMP2A
regulation of mitotic spindle assembly (GO:1901673)	0.119958	0.33072	8.29073	CHMP2A
regulation of neuroinflammatory response (GO:0150077)	0.119958	0.33072	8.29073	IL6
regulation of vascular endothelial growth factor signaling pathway (GO:1900746)	0.119958	0.33072	8.29073	CD63
heart trabecula morphogenesis (GO:0061384)	0.119958	0.33072	8.29073	RBP4
positive regulation of monocyte chemotaxis (GO:0090026)	0.119958	0.33072	8.29073	SERPINE1
maintenance of protein localization in organelle (GO:0072595)	0.119958	0.33072	8.29073	TAF3
prostaglandin biosynthetic process (GO:0001516)	0.119958	0.33072	8.29073	PTGS1
positive regulation of cellular biosynthetic process (GO:0031328)	0.120442	0.331215	2.54742	IL6;RGCC;HBB
negative regulation of cytokine production (GO:0001818)	0.123374	0.332204	2.5187	IL6;RGCC;BPI
negative regulation of dephosphorylation (GO:0035305)	0.12586	0.332204	7.85398	PPP1R36
regulation of acute inflammatory response (GO:0002673)	0.12586	0.332204	7.85398	IL6
negative regulation of lipid storage (GO:0010888)	0.12586	0.332204	7.85398	IL6
negative regulation of telomere maintenance via telomerase (GO:0032211)	0.12586	0.332204	7.85398	EXOSC10
energy reserve metabolic process (GO:0006112)	0.12586	0.332204	7.85398	LEPR
regulation of smooth muscle cell migration (GO:0014910)	0.12586	0.332204	7.85398	SERPINE1
regulation of tissue remodeling (GO:0034103)	0.12586	0.332204	7.85398	LEPR
positive regulation of cyclin-dependent protein kinase activity (GO:1904031)	0.12586	0.332204	7.85398	RGCC
skeletal muscle contraction (GO:0003009)	0.12586	0.332204	7.85398	TNNC1
lipopolysaccharide-mediated signaling pathway (GO:0031663)	0.12586	0.332204	7.85398	BPI
positive regulation of protein processing (GO:0010954)	0.12586	0.332204	7.85398	ANGPTL8
maintenance of protein location in nucleus (GO:0051457)	0.12586	0.332204	7.85398	TAF3
mitochondrial cytochrome c oxidase assembly (GO:0033617)	0.12586	0.332204	7.85398	SURF1
mitotic cytokinetic process (GO:1902410)	0.12586	0.332204	7.85398	CHMP2A
negative regulation of mitotic cell cycle phase transition (GO:1901991)	0.126598	0.332204	3.32929	RGCC;PSMB3
regulation of endothelial cell proliferation (GO:0001936)	0.126598	0.332204	3.32929	RGCC;CCL26
cellular response to fibroblast growth factor stimulus (GO:0044344)	0.126598	0.332204	3.32929	POLR2G;POLR2H
retinoid metabolic process (GO:0001523)	0.126598	0.332204	3.32929	RBP4;SDC4
aerobic respiration (GO:0009060)	0.131723	0.339115	7.4609	SURF1
purinergic nucleotide receptor signaling pathway (GO:0035590)	0.131723	0.339115	7.4609	TXN
regulation of cardiac muscle cell proliferation (GO:0060043)	0.131723	0.339115	7.4609	RBP4
negative regulation of response to wounding (GO:1903035)	0.131723	0.339115	7.4609	SERPINE1
regulation of lipoprotein lipase activity (GO:0051004)	0.131723	0.339115	7.4609	ANGPTL8
hydrogen peroxide catabolic process (GO:0042744)	0.131723	0.339115	7.4609	HBB
retinol metabolic process (GO:0042572)	0.131723	0.339115	7.4609	RBP4
positive regulation of T cell cytokine production (GO:0002726)	0.131723	0.339115	7.4609	IL6
regulation of mitotic cell cycle phase transition (GO:1901990)	0.132326	0.339866	2.43627	RGCC;PSMB3;CDC26
regulation of cell cycle phase transition (GO:1901987)	0.133347	0.341683	3.22141	PSMB3;CDC26
regulation of centrosome cycle (GO:0046605)	0.137546	0.34593	7.10526	CHMP2A
chaperone-mediated protein complex assembly (GO:0051131)	0.137546	0.34593	7.10526	PSMG3
regulation of lipid storage (GO:0010883)	0.137546	0.34593	7.10526	IL6
positive regulation of calcium ion transmembrane transporter activity (GO:1901021)	0.137546	0.34593	7.10526	TRDN
regulation of viral release from host cell (GO:1902186)	0.137546	0.34593	7.10526	CHMP2A
maturation of 5.8S rRNA from tricistronic rRNA transcript (SSU-rRNA, 5.8S rRNA, LSU-rRNA) (GO:0000466)	0.137546	0.34593	7.10526	EXOSC10
positive regulation of translational initiation (GO:0045948)	0.137546	0.34593	7.10526	POLR2G
proteasomal ubiquitin-independent protein catabolic process (GO:0010499)	0.137546	0.34593	7.10526	PSMB3
antigen processing and presentation of exogenous peptide antigen via MHC class II (GO:0019886)	0.140177	0.350758	3.12027	DCTN6;SPTBN2
RNA splicing (GO:0008380)	0.140177	0.350758	3.12027	NOVA1;LUC7L3
cellular response to tumor necrosis factor (GO:0071356)	0.141499	0.350758	2.35902	PSMB3;TXNDC17;CCL26
mRNA processing (GO:0006397)	0.142705	0.350758	2.0343	DDX39A;NOVA1;POLR2G;POLR2H
regulation of calcium ion transmembrane transport (GO:1903169)	0.143331	0.350758	6.78195	TRDN
cilium-dependent cell motility (GO:0060285)	0.143331	0.350758	6.78195	TEKT2
regulation of release of sequestered calcium ion into cytosol by sarcoplasmic reticulum (GO:0010880)	0.143331	0.350758	6.78195	TRDN
respiratory chain complex IV assembly (GO:0008535)	0.143331	0.350758	6.78195	SURF1
response to copper ion (GO:0046688)	0.143331	0.350758	6.78195	MT1A
positive regulation of interleukin-17 production (GO:0032740)	0.143331	0.350758	6.78195	IL6
positive regulation of receptor internalization (GO:0002092)	0.143331	0.350758	6.78195	CD63
positive regulation of transcription by RNA polymerase I (GO:0045943)	0.143331	0.350758	6.78195	RASL11A
antigen processing and presentation of peptide antigen via MHC class II (GO:0002495)	0.144772	0.3527	3.05628	DCTN6;SPTBN2
positive regulation of translation (GO:0045727)	0.144772	0.3527	3.05628	IL6;POLR2G
regulation of signal transduction (GO:0009966)	0.14773	0.357571	2.31016	CD63;RSPO3;NUCKS1
dendritic cell differentiation (GO:0097028)	0.149077	0.357571	6.48676	BATF3
extracellular matrix assembly (GO:0085029)	0.149077	0.357571	6.48676	RAMP2
positive regulation of viral life cycle (GO:1903902)	0.149077	0.357571	6.48676	CHMP2A
protein O-linked glycosylation (GO:0006493)	0.149398	0.357571	2.99485	TET3;TET1
regulation of cell death (GO:0010941)	0.149398	0.357571	2.99485	CHMP2A;HBB
positive regulation of vasculature development (GO:1904018)	0.149398	0.357571	2.99485	RAMP2;SERPINE1
mitotic sister chromatid segregation (GO:0000070)	0.149398	0.357571	2.99485	CSNK2B;CHMP2A
antigen processing and presentation of exogenous peptide antigen (GO:0002478)	0.151723	0.358641	2.96505	DCTN6;SPTBN2
negative regulation of antigen receptor-mediated signaling pathway (GO:0050858)	0.154785	0.358641	6.21617	SH2D1A
acylglycerol homeostasis (GO:0055090)	0.154785	0.358641	6.21617	ANGPTL8
negative regulation of response to endoplasmic reticulum stress (GO:1903573)	0.154785	0.358641	6.21617	UBXN1
regulation of heterotypic cell-cell adhesion (GO:0034114)	0.154785	0.358641	6.21617	SKAP1
phosphatidylinositol dephosphorylation (GO:0046856)	0.154785	0.358641	6.21617	MTMR4
endosome transport via multivesicular body sorting pathway (GO:0032509)	0.154785	0.358641	6.21617	CHMP2A
energy derivation by oxidation of organic compounds (GO:0015980)	0.154785	0.358641	6.21617	LEPR
regulation of protein processing (GO:0070613)	0.154785	0.358641	6.21617	ANGPTL8
regulation of ryanodine-sensitive calcium-release channel activity (GO:0060314)	0.154785	0.358641	6.21617	TRDN
regulation of spindle assembly (GO:0090169)	0.154785	0.358641	6.21617	CHMP2A
fat-soluble vitamin metabolic process (GO:0006775)	0.154785	0.358641	6.21617	TTPA
response to hexose (GO:0009746)	0.154785	0.358641	6.21617	GYS2
positive regulation of vascular endothelial growth factor production (GO:0010575)	0.154785	0.358641	6.21617	IL6
ventricular cardiac muscle tissue development (GO:0003229)	0.154785	0.358641	6.21617	TNNC1
nucleotide-excision repair (GO:0006289)	0.156393	0.361596	2.90718	POLR2G;POLR2H
negative regulation of cell development (GO:0010721)	0.160455	0.364793	5.96722	IL6
cellular response to drug (GO:0035690)	0.160455	0.364793	5.96722	TFRC
negative regulation of telomere maintenance via telomere lengthening (GO:1904357)	0.160455	0.364793	5.96722	EXOSC10
regulation of monocyte chemotaxis (GO:0090025)	0.160455	0.364793	5.96722	SERPINE1
positive regulation of filopodium assembly (GO:0051491)	0.160455	0.364793	5.96722	MIEN1
positive regulation of G1/S transition of mitotic cell cycle (GO:1900087)	0.160455	0.364793	5.96722	RGCC
positive regulation of histone methylation (GO:0031062)	0.160455	0.364793	5.96722	TET1
mononuclear cell differentiation (GO:1903131)	0.160455	0.364793	5.96722	BATF3
negative regulation of transmembrane receptor protein serine/threonine kinase signaling pathway (GO:0090101)	0.163449	0.365875	2.82447	FST;MTMR4
regulation of protein ubiquitination (GO:0031396)	0.165813	0.365875	2.79793	FANCI;UBXN1
acute inflammatory response (GO:0002526)	0.166087	0.365875	5.73742	IL6
negative regulation of cation channel activity (GO:2001258)	0.166087	0.365875	5.73742	TRDN
regulation of blood coagulation (GO:0030193)	0.166087	0.365875	5.73742	SERPINE1
cellular response to cadmium ion (GO:0071276)	0.166087	0.365875	5.73742	MT1A
peptide hormone secretion (GO:0030072)	0.166087	0.365875	5.73742	IL6
regulation of vascular endothelial growth factor production (GO:0010574)	0.166087	0.365875	5.73742	IL6
regulation of vasculature development (GO:1901342)	0.166087	0.365875	5.73742	IL6
positive regulation of gene silencing by miRNA (GO:2000637)	0.166087	0.365875	5.73742	IL6
response to glucocorticoid (GO:0051384)	0.166087	0.365875	5.73742	IL6
positive regulation of nitric oxide biosynthetic process (GO:0045429)	0.166087	0.365875	5.73742	HBB
positive regulation of nuclear division (GO:0051785)	0.166087	0.365875	5.73742	RGCC
mitotic chromosome condensation (GO:0007076)	0.166087	0.365875	5.73742	CSNK2B
transcription by RNA polymerase II (GO:0006366)	0.167844	0.365875	1.9036	POLR2G;RTF1;POLR2H;TAF3
regulation of interleukin-6 production (GO:0032675)	0.168184	0.365875	2.77189	IL6;BPI
proteasome-mediated ubiquitin-dependent protein catabolic process (GO:0043161)	0.169141	0.365875	1.8975	UBXN1;PSMB3;CDC26;FBXO2
negative regulation of inflammatory response (GO:0050728)	0.170209	0.365875	2.15388	GPR176;IL6;RAMP2
cellular divalent inorganic cation homeostasis (GO:0072503)	0.170561	0.365875	2.74632	MT1A;TRDN
negative regulation of calcium ion transmembrane transporter activity (GO:1901020)	0.171682	0.365875	5.52464	TRDN
regulation of B cell activation (GO:0050864)	0.171682	0.365875	5.52464	IL6
negative regulation of oxidative stress-induced cell death (GO:1903202)	0.171682	0.365875	5.52464	TXN
negative regulation of phosphatase activity (GO:0010923)	0.171682	0.365875	5.52464	PPP1R36
cellular response to interleukin-6 (GO:0071354)	0.171682	0.365875	5.52464	IL6
cellular zinc ion homeostasis (GO:0006882)	0.171682	0.365875	5.52464	MT1A
regulation of muscle contraction (GO:0006937)	0.171682	0.365875	5.52464	TNNC1
regulation of phosphatase activity (GO:0010921)	0.171682	0.365875	5.52464	PPP1R36
regulation of sodium ion transmembrane transport (GO:1902305)	0.171682	0.365875	5.52464	FXYD7
glycogen metabolic process (GO:0005977)	0.171682	0.365875	5.52464	GYS2
histone mRNA metabolic process (GO:0008334)	0.171682	0.365875	5.52464	EXOSC10
positive regulation of monooxygenase activity (GO:0032770)	0.171682	0.365875	5.52464	S100A1
positive regulation of nitric oxide metabolic process (GO:1904407)	0.171682	0.365875	5.52464	HBB
positive regulation of protein modification process (GO:0031401)	0.173498	0.369023	2.13324	TFRC;LEPR;TXN
regulation of DNA biosynthetic process (GO:2000278)	0.17724	0.370468	5.32707	RGCC
negative regulation of wound healing (GO:0061045)	0.17724	0.370468	5.32707	SERPINE1
determination of bilateral symmetry (GO:0009855)	0.17724	0.370468	5.32707	DNAH11
response to cadmium ion (GO:0046686)	0.17724	0.370468	5.32707	MT1A
response to zinc ion (GO:0010043)	0.17724	0.370468	5.32707	MT1A
positive regulation of leukocyte migration (GO:0002687)	0.17724	0.370468	5.32707	IL6
hydrogen peroxide metabolic process (GO:0042743)	0.17724	0.370468	5.32707	HBB
lipid catabolic process (GO:0016042)	0.17724	0.370468	5.32707	HSD11B1
protein K11-linked ubiquitination (GO:0070979)	0.17724	0.370468	5.32707	CDC26
cellular response to lectin (GO:1990858)	0.180122	0.370625	2.64857	PSMB3;ICAM3
cellular response to molecule of bacterial origin (GO:0071219)	0.180122	0.370625	2.64857	IL6;SERPINE1
stimulatory C-type lectin receptor signaling pathway (GO:0002223)	0.180122	0.370625	2.64857	PSMB3;ICAM3
tumor necrosis factor-mediated signaling pathway (GO:0033209)	0.182526	0.370625	2.6252	PSMB3;TXNDC17
regulation of cation transmembrane transport (GO:1904062)	0.18276	0.370625	5.14312	CD63
peptidyl-lysine trimethylation (GO:0018023)	0.18276	0.370625	5.14312	TET3
positive regulation of B cell proliferation (GO:0030890)	0.18276	0.370625	5.14312	TFRC
positive regulation of DNA recombination (GO:0045911)	0.18276	0.370625	5.14312	TFRC
respiratory tube development (GO:0030323)	0.18276	0.370625	5.14312	RBP4
histone H3-K4 methylation (GO:0051568)	0.18276	0.370625	5.14312	TET3
maintenance of blood-brain barrier (GO:0035633)	0.18276	0.370625	5.14312	IL6
termination of RNA polymerase I transcription (GO:0006363)	0.18276	0.370625	5.14312	POLR2H
zinc ion homeostasis (GO:0055069)	0.18276	0.370625	5.14312	MT1A
mRNA splice site selection (GO:0006376)	0.18276	0.370625	5.14312	LUC7L3
multivesicular body assembly (GO:0036258)	0.18276	0.370625	5.14312	CHMP2A
ncRNA catabolic process (GO:0034661)	0.18276	0.370625	5.14312	EXOSC10
positive regulation of protein-containing complex assembly (GO:0031334)	0.187346	0.371373	2.57968	TFRC;SKAP1
activation of protein kinase B activity (GO:0032148)	0.188244	0.371373	4.97143	TXN
purine nucleoside bisphosphate metabolic process (GO:0034032)	0.188244	0.371373	4.97143	GLYAT
aminoglycan catabolic process (GO:0006026)	0.188244	0.371373	4.97143	SDC4
negative regulation of interleukin-6 production (GO:0032715)	0.188244	0.371373	4.97143	BPI
negative regulation of proteasomal ubiquitin-dependent protein catabolic process (GO:0032435)	0.188244	0.371373	4.97143	UBXN1
regulation of potassium ion transport (GO:0043266)	0.188244	0.371373	4.97143	CD63
regulation of transmembrane receptor protein serine/threonine kinase signaling pathway (GO:0090092)	0.188244	0.371373	4.97143	FST
ribonucleoside bisphosphate metabolic process (GO:0033875)	0.188244	0.371373	4.97143	GLYAT
positive regulation of locomotion (GO:0040017)	0.188244	0.371373	4.97143	CCL26
positive regulation of mononuclear cell migration (GO:0071677)	0.188244	0.371373	4.97143	SERPINE1
triglyceride homeostasis (GO:0070328)	0.188244	0.371373	4.97143	ANGPTL8
vitamin transport (GO:0051180)	0.188244	0.371373	4.97143	TTPA
prostaglandin metabolic process (GO:0006693)	0.188244	0.371373	4.97143	PTGS1
multivesicular body organization (GO:0036257)	0.188244	0.371373	4.97143	CHMP2A
innate immune response activating cell surface receptor signaling pathway (GO:0002220)	0.189764	0.373327	2.5575	PSMB3;ICAM3
negative regulation of cell-matrix adhesion (GO:0001953)	0.193691	0.373327	4.81082	SERPINE1
negative regulation of DNA biosynthetic process (GO:2000279)	0.193691	0.373327	4.81082	EXOSC10
regulation of centrosome duplication (GO:0010824)	0.193691	0.373327	4.81082	CHMP2A
regulation of chemotaxis (GO:0050920)	0.193691	0.373327	4.81082	CCL26
cardiac muscle tissue morphogenesis (GO:0055008)	0.193691	0.373327	4.81082	TNNC1
endodermal cell differentiation (GO:0035987)	0.193691	0.373327	4.81082	RTF1
hematopoietic progenitor cell differentiation (GO:0002244)	0.193691	0.373327	4.81082	FST
positive regulation of interleukin-10 production (GO:0032733)	0.193691	0.373327	4.81082	IL6
liver development (GO:0001889)	0.193691	0.373327	4.81082	IL6
positive regulation of receptor signaling pathway via STAT (GO:1904894)	0.193691	0.373327	4.81082	IL6
transcription initiation from RNA polymerase I promoter (GO:0006361)	0.193691	0.373327	4.81082	POLR2H
modulation by host of symbiont process (GO:0051851)	0.193691	0.373327	4.81082	NUCKS1
potassium ion transport (GO:0006813)	0.19704	0.375188	2.49318	KCNG2;KCNJ8
regulation of interleukin-17 production (GO:0032660)	0.199102	0.375188	4.66024	IL6
phosphatidylcholine biosynthetic process (GO:0006656)	0.199102	0.375188	4.66024	CSNK2B
regulation of sprouting angiogenesis (GO:1903670)	0.199102	0.375188	4.66024	S100A1
positive regulation of histone modification (GO:0031058)	0.199102	0.375188	4.66024	TET1
positive regulation of receptor signaling pathway via JAK-STAT (GO:0046427)	0.199102	0.375188	4.66024	IL6
vasculogenesis (GO:0001570)	0.199102	0.375188	4.66024	RAMP2
primary alcohol metabolic process (GO:0034308)	0.199102	0.375188	4.66024	RBP4
muscle cell development (GO:0055001)	0.199102	0.375188	4.66024	RAMP2
post-translational protein modification (GO:0043687)	0.201273	0.375188	1.76179	IL6;PSMB3;FBXO2;PENK
regulation of tumor necrosis factor production (GO:0032680)	0.201911	0.375188	2.45206	IL6;BPI
platelet degranulation (GO:0002576)	0.204351	0.375188	2.432	CD63;SERPINE1
regulation of protein secretion (GO:0050708)	0.204351	0.375188	2.432	KCNG2;IL6
negative regulation of extrinsic apoptotic signaling pathway via death domain receptors (GO:1902042)	0.204477	0.375188	4.5188	SERPINE1
autophagosome maturation (GO:0097352)	0.204477	0.375188	4.5188	LIX1
regulation of cell adhesion mediated by integrin (GO:0033628)	0.204477	0.375188	4.5188	SERPINE1
negative regulation of mitochondrion organization (GO:0010823)	0.204477	0.375188	4.5188	TFRC
cardiac muscle contraction (GO:0060048)	0.204477	0.375188	4.5188	TNNC1
cellular response to vascular endothelial growth factor stimulus (GO:0035924)	0.204477	0.375188	4.5188	RAMP2
epithelial tube morphogenesis (GO:0060562)	0.204477	0.375188	4.5188	CSNK2B
female gamete generation (GO:0007292)	0.204477	0.375188	4.5188	DIAPH2
regulation of transmembrane transport (GO:0034762)	0.204477	0.375188	4.5188	KCNJ8
positive regulation of DNA binding (GO:0043388)	0.204477	0.375188	4.5188	TXN
striated muscle tissue development (GO:0014706)	0.204477	0.375188	4.5188	RBP4
positive regulation of release of sequestered calcium ion into cytosol (GO:0051281)	0.204477	0.375188	4.5188	TRDN
transcription by RNA polymerase I (GO:0006360)	0.204477	0.375188	4.5188	POLR2H
ventricular cardiac muscle tissue morphogenesis (GO:0055010)	0.204477	0.375188	4.5188	TNNC1
circulatory system development (GO:0072359)	0.206795	0.375188	2.41227	RBP4;RAMP2
bicarbonate transport (GO:0015701)	0.209816	0.375188	4.38567	HBB
negative regulation of neurogenesis (GO:0050768)	0.209816	0.375188	4.38567	IL6
cellular response to hydrogen peroxide (GO:0070301)	0.209816	0.375188	4.38567	IL6
negative regulation of T cell proliferation (GO:0042130)	0.209816	0.375188	4.38567	SDC4
cellular response to virus (GO:0098586)	0.209816	0.375188	4.38567	IL6
regulation of ion transmembrane transport (GO:0034765)	0.209816	0.375188	4.38567	KCNJ8
nuclear-transcribed mRNA catabolic process, exonucleolytic (GO:0000291)	0.209816	0.375188	4.38567	POLR2G
regulation of mitotic spindle organization (GO:0060236)	0.209816	0.375188	4.38567	CHMP2A
embryonic skeletal system development (GO:0048706)	0.209816	0.375188	4.38567	RBP4
positive regulation of cell cycle G1/S phase transition (GO:1902808)	0.209816	0.375188	4.38567	RGCC
regulation of T cell receptor signaling pathway (GO:0050856)	0.209816	0.375188	4.38567	SH2D1A
respiratory system development (GO:0060541)	0.209816	0.375188	4.38567	RBP4
positive regulation of lymphocyte activation (GO:0051251)	0.209816	0.375188	4.38567	IL6
lung development (GO:0030324)	0.209816	0.375188	4.38567	RBP4
muscle cell differentiation (GO:0042692)	0.209816	0.375188	4.38567	MRTFB
protein localization to cilium (GO:0061512)	0.209816	0.375188	4.38567	ARL3
plasma membrane bounded cell projection organization (GO:0120036)	0.211692	0.377923	2.37374	IL6;GPRIN1
positive regulation of macromolecule biosynthetic process (GO:0010557)	0.214145	0.378457	2.35493	IL6;RGCC
muscle contraction (GO:0006936)	0.214145	0.378457	2.35493	TNNC1;TRDN
negative regulation of fat cell differentiation (GO:0045599)	0.21512	0.378457	4.26015	IL6
cellular response to heat (GO:0034605)	0.21512	0.378457	4.26015	HSPA6
platelet aggregation (GO:0070527)	0.21512	0.378457	4.26015	HBB
regulation of receptor internalization (GO:0002090)	0.21512	0.378457	4.26015	CD63
positive regulation of mitotic nuclear division (GO:0045840)	0.21512	0.378457	4.26015	RGCC
membrane assembly (GO:0071709)	0.21512	0.378457	4.26015	CHMP2A
transferrin transport (GO:0033572)	0.21512	0.378457	4.26015	TFRC
regulation of primary metabolic process (GO:0080090)	0.216601	0.379837	2.33641	PSMB3;ANGPTL8
protein glycosylation (GO:0006486)	0.216601	0.379837	2.33641	TET3;TET1
cellular response to hypoxia (GO:0071456)	0.219059	0.382779	2.31818	RGCC;PSMB3
acyl-CoA metabolic process (GO:0006637)	0.220388	0.382779	4.1416	GLYAT
negative regulation of endothelial cell proliferation (GO:0001937)	0.220388	0.382779	4.1416	RGCC
regulation of transport (GO:0051049)	0.220388	0.382779	4.1416	LEPR
lysosome localization (GO:0032418)	0.220388	0.382779	4.1416	S100A13
protein insertion into ER membrane (GO:0045048)	0.220388	0.382779	4.1416	EMC9
anterograde trans-synaptic signaling (GO:0098916)	0.224748	0.386931	1.86484	GPR176;NOVA1;PENK
actin-myosin filament sliding (GO:0033275)	0.225621	0.386931	4.02947	TNNC1
regulation of cell communication (GO:0010646)	0.225621	0.386931	4.02947	TRDN
negative regulation of proteasomal protein catabolic process (GO:1901799)	0.225621	0.386931	4.02947	UBXN1
negative regulation of ubiquitin-dependent protein catabolic process (GO:2000059)	0.225621	0.386931	4.02947	UBXN1
regulation of phosphoprotein phosphatase activity (GO:0043666)	0.225621	0.386931	4.02947	CSNK2B
positive regulation of insulin secretion (GO:0032024)	0.225621	0.386931	4.02947	RBP4
muscle filament sliding (GO:0030049)	0.225621	0.386931	4.02947	TNNC1
positive regulation of DNA-binding transcription factor activity (GO:0051091)	0.228271	0.390313	1.84931	IL6;RGCC;TFRC
negative regulation of lymphocyte proliferation (GO:0050672)	0.230819	0.390313	3.92323	SDC4
regulation of dendrite development (GO:0050773)	0.230819	0.390313	3.92323	RTN4IP1
regulation of ion transmembrane transporter activity (GO:0032412)	0.230819	0.390313	3.92323	FXYD7
odontogenesis (GO:0042476)	0.230819	0.390313	3.92323	ROGDI
regulation of nitric-oxide synthase activity (GO:0050999)	0.230819	0.390313	3.92323	S100A1
phospholipid dephosphorylation (GO:0046839)	0.230819	0.390313	3.92323	MTMR4
regulation of receptor-mediated endocytosis (GO:0048259)	0.230819	0.390313	3.92323	SERPINE1
replication fork processing (GO:0031297)	0.230819	0.390313	3.92323	NUCKS1
organic substance transport (GO:0071702)	0.231385	0.390664	2.23112	RAMP2;CHMP2A
negative regulation of blood coagulation (GO:0030195)	0.235983	0.392343	3.82244	SERPINE1
carboxylic acid metabolic process (GO:0019752)	0.235983	0.392343	3.82244	GLYAT
organic hydroxy compound transport (GO:0015850)	0.235983	0.392343	3.82244	RBP4
regulation of nitric oxide biosynthetic process (GO:0045428)	0.235983	0.392343	3.82244	HBB
positive regulation of cation channel activity (GO:2001259)	0.235983	0.392343	3.82244	TRDN
regulation of sodium ion transmembrane transporter activity (GO:2000649)	0.235983	0.392343	3.82244	FXYD7
response to organonitrogen compound (GO:0010243)	0.235983	0.392343	3.82244	IL6
intraciliary transport involved in cilium assembly (GO:0035735)	0.235983	0.392343	3.82244	DYNLRB2
lymphocyte migration (GO:0072676)	0.235983	0.392343	3.82244	CCL26
positive regulation of wound healing (GO:0090303)	0.235983	0.392343	3.82244	SERPINE1
cytokine-mediated signaling pathway (GO:0019221)	0.237806	0.394772	1.4673	IL6;PSMB3;CSNK2B;LEPR;TXNDC17;CCL26
positive regulation of response to external stimulus (GO:0032103)	0.238803	0.394784	2.18193	SERPINE1;CCL26
potassium ion transmembrane transport (GO:0071805)	0.238803	0.394784	2.18193	KCNG2;KCNJ8
positive regulation of signal transduction (GO:0009967)	0.238901	0.394784	1.80419	CD63;IL6;RSPO3
negative regulation of cell-cell adhesion (GO:0022408)	0.241112	0.395116	3.72669	RGCC
regulation of filopodium assembly (GO:0051489)	0.241112	0.395116	3.72669	MIEN1
gluconeogenesis (GO:0006094)	0.241112	0.395116	3.72669	RBP4
T cell differentiation (GO:0030217)	0.241112	0.395116	3.72669	LEPR
visual system development (GO:0150063)	0.241112	0.395116	3.72669	RBP4
protein localization to cell periphery (GO:1990778)	0.241278	0.395116	2.16601	RAMP2;ARL3
regulation of chemokine production (GO:0032642)	0.246207	0.400178	3.63561	IL6
cellular respiration (GO:0045333)	0.246207	0.400178	3.63561	SURF1
regulation of extrinsic apoptotic signaling pathway via death domain receptors (GO:1902041)	0.246207	0.400178	3.63561	SERPINE1
determination of left/right symmetry (GO:0007368)	0.246207	0.400178	3.63561	DNAH11
potassium ion import across plasma membrane (GO:1990573)	0.246207	0.400178	3.63561	KCNJ8
monocarboxylic acid metabolic process (GO:0032787)	0.248712	0.403647	2.1196	HYI;GLYAT
regulation of cytokine production involved in inflammatory response (GO:1900015)	0.251268	0.403915	3.54887	IL6
cellular glucose homeostasis (GO:0001678)	0.251268	0.403915	3.54887	NUCKS1
DNA-dependent DNA replication maintenance of fidelity (GO:0045005)	0.251268	0.403915	3.54887	NUCKS1
positive regulation of peptide hormone secretion (GO:0090277)	0.251268	0.403915	3.54887	RBP4
substantia nigra development (GO:0021762)	0.251268	0.403915	3.54887	S100A1
tRNA aminoacylation for protein translation (GO:0006418)	0.251268	0.403915	3.54887	PARS2
regulation of cell population proliferation (GO:0042127)	0.252305	0.403915	1.39135	IL6;RGCC;TFRC;FTH1;CSNK2B;S100A13;TET1
cardiac ventricle morphogenesis (GO:0003208)	0.256295	0.403915	3.46617	TNNC1
cation transmembrane transport (GO:0098655)	0.256295	0.403915	3.46617	KCNJ8
neurogenesis (GO:0022008)	0.256295	0.403915	3.46617	ROGDI
embryonic organ morphogenesis (GO:0048562)	0.256295	0.403915	3.46617	RBP4
positive regulation of biosynthetic process (GO:0009891)	0.256295	0.403915	3.46617	RGCC
positive regulation of cell-matrix adhesion (GO:0001954)	0.256295	0.403915	3.46617	SKAP1
hexose biosynthetic process (GO:0019319)	0.256295	0.403915	3.46617	RBP4
homotypic cell-cell adhesion (GO:0034109)	0.256295	0.403915	3.46617	HBB
positive regulation of mRNA catabolic process (GO:0061014)	0.256295	0.403915	3.46617	POLR2G
positive regulation of osteoblast differentiation (GO:0045669)	0.256295	0.403915	3.46617	IL6
lymphocyte chemotaxis (GO:0048247)	0.256295	0.403915	3.46617	CCL26
positive regulation of stress fiber assembly (GO:0051496)	0.256295	0.403915	3.46617	RGCC
mRNA catabolic process (GO:0006402)	0.256295	0.403915	3.46617	EXOSC10
negative regulation of T cell activation (GO:0050868)	0.261289	0.40824	3.38722	SDC4
cellular response to radiation (GO:0071478)	0.261289	0.40824	3.38722	ADIRF
regulation of insulin receptor signaling pathway (GO:0046626)	0.261289	0.40824	3.38722	NUCKS1
chromosome condensation (GO:0030261)	0.261289	0.40824	3.38722	CSNK2B
regulation of receptor signaling pathway via JAK-STAT (GO:0046425)	0.261289	0.40824	3.38722	IL6
positive regulation of RNA metabolic process (GO:0051254)	0.261289	0.40824	3.38722	IL6
positive regulation of transcription by RNA polymerase II (GO:0045944)	0.264116	0.41127	1.33799	IL6;RGCC;SERPINE1;TET3;MRTFB;ADIRF;TET1;SKAP1
regulation of B cell proliferation (GO:0030888)	0.266249	0.41127	3.31178	TFRC
regulation of DNA metabolic process (GO:0051052)	0.266249	0.41127	3.31178	NUCKS1
regulation of fibroblast proliferation (GO:0048145)	0.266249	0.41127	3.31178	FTH1
negative regulation of tumor necrosis factor production (GO:0032720)	0.266249	0.41127	3.31178	BPI
positive regulation of organelle assembly (GO:1902117)	0.266249	0.41127	3.31178	SDC4
spliceosomal complex assembly (GO:0000245)	0.266249	0.41127	3.31178	LUC7L3
positive regulation of smooth muscle cell proliferation (GO:0048661)	0.266249	0.41127	3.31178	IL6
positive regulation of cell migration (GO:0030335)	0.269437	0.414182	1.68742	MIEN1;GLIPR2;CCL26
negative regulation of cold-induced thermogenesis (GO:0120163)	0.271177	0.414182	3.23962	NOVA1
regulation of cellular metabolic process (GO:0031323)	0.271177	0.414182	3.23962	ANGPTL8
polyol metabolic process (GO:0019751)	0.271177	0.414182	3.23962	ISYNA1
regulation of protein localization to nucleus (GO:1900180)	0.271177	0.414182	3.23962	TFRC
positive regulation of cell-cell adhesion (GO:0022409)	0.271177	0.414182	3.23962	SKAP1
regulation of wound healing (GO:0061041)	0.271177	0.414182	3.23962	SERPINE1
positive regulation of pathway-restricted SMAD protein phosphorylation (GO:0010862)	0.271177	0.414182	3.23962	CSNK2B
dephosphorylation (GO:0016311)	0.273527	0.414678	1.97823	ACP6;MTMR4
positive regulation of Wnt signaling pathway (GO:0030177)	0.273527	0.414678	1.97823	PSMB3;RSPO3
negative regulation of mitotic cell cycle (GO:0045930)	0.276071	0.414678	3.17053	RGCC
cellular response to ionizing radiation (GO:0071479)	0.276071	0.414678	3.17053	NUCKS1
negative regulation of tumor necrosis factor superfamily cytokine production (GO:1903556)	0.276071	0.414678	3.17053	BPI
regulation of interleukin-10 production (GO:0032653)	0.276071	0.414678	3.17053	IL6
nucleus organization (GO:0006997)	0.276071	0.414678	3.17053	CHMP2A
phosphatidic acid biosynthetic process (GO:0006654)	0.276071	0.414678	3.17053	ACP6
regulation of protein metabolic process (GO:0051246)	0.276071	0.414678	3.17053	ANGPTL8
positive regulation of endocytosis (GO:0045807)	0.276071	0.414678	3.17053	SERPINE1
Golgi to plasma membrane transport (GO:0006893)	0.276071	0.414678	3.17053	ARL3
inositol phosphate metabolic process (GO:0043647)	0.276071	0.414678	3.17053	ISYNA1
cellular response to interleukin-1 (GO:0071347)	0.278491	0.416297	1.95217	PSMB3;CCL26
positive regulation of NF-kappaB transcription factor activity (GO:0051092)	0.278491	0.416297	1.95217	IL6;TFRC
positive regulation of MAPK cascade (GO:0043410)	0.278509	0.416297	1.65587	IL6;GLIPR2;CCL26
adherens junction organization (GO:0034332)	0.280933	0.416297	3.10432	RAMP2
aminoglycan biosynthetic process (GO:0006023)	0.280933	0.416297	3.10432	SDC4
positive regulation of actin filament polymerization (GO:0030838)	0.280933	0.416297	3.10432	CCL26
regulation of smooth muscle cell proliferation (GO:0048660)	0.280933	0.416297	3.10432	IL6
response to glucose (GO:0009749)	0.280933	0.416297	3.10432	GYS2
mitotic cytokinesis (GO:0000281)	0.280933	0.416297	3.10432	ARL3
regulation of signal transduction by p53 class mediator (GO:1901796)	0.280972	0.416297	1.93939	CSNK2B;TAF3
amino acid transport (GO:0006865)	0.285763	0.421923	3.04082	SLC7A4
phosphatidic acid metabolic process (GO:0046473)	0.285763	0.421923	3.04082	ACP6
T cell receptor signaling pathway (GO:0050852)	0.285932	0.421923	1.91434	PSMB3;SKAP1
response to lipopolysaccharide (GO:0032496)	0.28841	0.422457	1.90205	IL6;SERPINE1
blood circulation (GO:0008015)	0.29056	0.422457	2.97985	TRDN
regulation of cellular amine metabolic process (GO:0033238)	0.29056	0.422457	2.97985	PSMB3
regulation of epithelial cell migration (GO:0010632)	0.29056	0.422457	2.97985	GLIPR2
negative regulation of protein ubiquitination (GO:0031397)	0.29056	0.422457	2.97985	UBXN1
positive regulation of actin filament bundle assembly (GO:0032233)	0.29056	0.422457	2.97985	RGCC
positive regulation of fat cell differentiation (GO:0045600)	0.29056	0.422457	2.97985	ADIRF
sensory perception (GO:0007600)	0.29056	0.422457	2.97985	PENK
mitotic metaphase plate congression (GO:0007080)	0.29056	0.422457	2.97985	CHMP2A
mitotic nuclear membrane organization (GO:0101024)	0.29056	0.422457	2.97985	CHMP2A
mitotic nuclear membrane reassembly (GO:0007084)	0.29056	0.422457	2.97985	CHMP2A
regulation of release of sequestered calcium ion into cytosol (GO:0051279)	0.295326	0.428242	2.92127	TRDN
regulation of telomere maintenance via telomerase (GO:0032210)	0.295326	0.428242	2.92127	EXOSC10
bicellular tight junction assembly (GO:0070830)	0.300059	0.432136	2.86495	RAMP2
cardiac muscle tissue development (GO:0048738)	0.300059	0.432136	2.86495	RBP4
regulation of DNA replication (GO:0006275)	0.300059	0.432136	2.86495	NUCKS1
cellular macromolecule catabolic process (GO:0044265)	0.300059	0.432136	2.86495	FBXO2
positive regulation of chemokine production (GO:0032722)	0.300059	0.432136	2.86495	IL6
double-strand break repair (GO:0006302)	0.300789	0.432136	1.84287	UBXN1;NUCKS1
heart development (GO:0007507)	0.300789	0.432136	1.84287	RBP4;RAMP2
positive regulation of intracellular signal transduction (GO:1902533)	0.303551	0.43327	1.38453	IL6;TFRC;S100A13;TXN;HCST
regulation of alternative mRNA splicing, via spliceosome (GO:0000381)	0.304761	0.43327	2.81075	NOVA1
regulation of cellular amino acid metabolic process (GO:0006521)	0.304761	0.43327	2.81075	PSMB3
nuclear membrane reassembly (GO:0031468)	0.304761	0.43327	2.81075	CHMP2A
cytoplasmic microtubule organization (GO:0031122)	0.304761	0.43327	2.81075	TRDN
regulation of potassium ion transmembrane transport (GO:1901379)	0.304761	0.43327	2.81075	CD63
glycosaminoglycan metabolic process (GO:0030203)	0.304761	0.43327	2.81075	SDC4
striated muscle contraction (GO:0006941)	0.304761	0.43327	2.81075	TNNC1
negative regulation of cytokine-mediated signaling pathway (GO:0001960)	0.309432	0.438195	2.75856	IL6
negative regulation of protein modification by small protein conjugation or removal (GO:1903321)	0.309432	0.438195	2.75856	UBXN1
glycoprotein metabolic process (GO:0009100)	0.309432	0.438195	2.75856	FBXO2
protein-containing complex disassembly (GO:0032984)	0.314072	0.43962	2.70827	LIX1
blood vessel morphogenesis (GO:0048514)	0.314072	0.43962	2.70827	RAMP2
negative regulation of metabolic process (GO:0009892)	0.314072	0.43962	2.70827	NOVA1
chemokine-mediated signaling pathway (GO:0070098)	0.314072	0.43962	2.70827	CCL26
DNA damage response, signal transduction by p53 class mediator resulting in cell cycle arrest (GO:0006977)	0.314072	0.43962	2.70827	RGCC
glycosaminoglycan catabolic process (GO:0006027)	0.314072	0.43962	2.70827	SDC4
positive regulation of interleukin-1 beta production (GO:0032731)	0.314072	0.43962	2.70827	IL6
sensory organ development (GO:0007423)	0.314072	0.43962	2.70827	RBP4
tight junction assembly (GO:0120192)	0.314072	0.43962	2.70827	RAMP2
neuron projection development (GO:0031175)	0.318058	0.442657	1.76591	IL6;GPRIN1
positive regulation of I-kappaB kinase/NF-kappaB signaling (GO:0043123)	0.318058	0.442657	1.76591	TFRC;S100A13
negative regulation of cell cycle G2/M phase transition (GO:1902750)	0.31868	0.442657	2.65977	PSMB3
regulation of mitotic nuclear division (GO:0007088)	0.31868	0.442657	2.65977	RGCC
positive regulation of gene expression, epigenetic (GO:0045815)	0.31868	0.442657	2.65977	POLR2H
positive regulation of proteolysis (GO:0045862)	0.31868	0.442657	2.65977	ANGPTL8
positive regulation of ERK1 and ERK2 cascade (GO:0070374)	0.320518	0.444642	1.75544	GLIPR2;CCL26
DNA repair (GO:0006281)	0.322373	0.445042	1.51929	FANCI;UBXN1;NUCKS1
negative regulation of hydrolase activity (GO:0051346)	0.323258	0.445042	2.61298	PPP1R36
chordate embryonic development (GO:0043009)	0.323258	0.445042	2.61298	RBP4
regulation of pathway-restricted SMAD protein phosphorylation (GO:0060393)	0.323258	0.445042	2.61298	CSNK2B
eye development (GO:0001654)	0.323258	0.445042	2.61298	RBP4
positive regulation of mitotic cell cycle phase transition (GO:1901992)	0.323258	0.445042	2.61298	RGCC
cation transport (GO:0006812)	0.325431	0.447468	1.73485	KCNG2;KCNJ8
extracellular matrix organization (GO:0030198)	0.326039	0.447739	1.50891	SERPINE1;ICAM3;DPT
negative regulation of autophagy (GO:0010507)	0.327806	0.447905	2.5678	LEPR
protein polymerization (GO:0051258)	0.327806	0.447905	2.5678	CHMP2A
response to reactive oxygen species (GO:0000302)	0.327806	0.447905	2.5678	HBB
positive regulation of tyrosine phosphorylation of STAT protein (GO:0042531)	0.327806	0.447905	2.5678	IL6
negative regulation of cellular process (GO:0048523)	0.329885	0.450181	1.33379	IL6;RGCC;FTH1;CSNK2B;CHMP2A
apical junction assembly (GO:0043297)	0.332323	0.451809	2.52415	RAMP2
cellular response to chemokine (GO:1990869)	0.332323	0.451809	2.52415	CCL26
peptidyl-threonine phosphorylation (GO:0018107)	0.332323	0.451809	2.52415	CSNK2B
positive regulation of developmental process (GO:0051094)	0.332784	0.451872	1.70485	TFRC;FST
regulation of mitotic cell cycle (GO:0007346)	0.33523	0.454061	1.69508	PSMB3;CDC26
regulation of translation (GO:0006417)	0.33523	0.454061	1.69508	EIF5B;IL6
regulation of DNA-templated transcription, initiation (GO:2000142)	0.336809	0.454251	2.48195	IL6
pattern recognition receptor signaling pathway (GO:0002221)	0.336809	0.454251	2.48195	S100A1
positive regulation of DNA biosynthetic process (GO:2000573)	0.336809	0.454251	2.48195	RGCC
chemical synaptic transmission (GO:0007268)	0.337038	0.454251	1.47857	GPR176;NOVA1;PENK
RNA processing (GO:0006396)	0.337673	0.454544	1.68541	NOVA1;LUC7L3
regulated exocytosis (GO:0045055)	0.340114	0.457121	1.67586	CD63;SERPINE1
regulation of neurogenesis (GO:0050767)	0.341266	0.457121	2.44114	IL6
glucose metabolic process (GO:0006006)	0.341266	0.457121	2.44114	RBP4
response to retinoic acid (GO:0032526)	0.341266	0.457121	2.44114	RBP4
negative regulation of endopeptidase activity (GO:0010951)	0.345694	0.460784	2.40165	SERPINE1
cellular response to reactive oxygen species (GO:0034614)	0.345694	0.460784	2.40165	IL6
neuropeptide signaling pathway (GO:0007218)	0.345694	0.460784	2.40165	PENK
positive regulation of DNA metabolic process (GO:0051054)	0.345694	0.460784	2.40165	RGCC
negative regulation of cell cycle process (GO:0010948)	0.350091	0.463807	2.36341	CHMP2A
regulation of cellular ketone metabolic process (GO:0010565)	0.350091	0.463807	2.36341	PSMB3
regulation of transcription initiation from RNA polymerase II promoter (GO:0060260)	0.350091	0.463807	2.36341	IL6
pre-replicative complex assembly (GO:0036388)	0.350091	0.463807	2.36341	PSMB3
protein catabolic process (GO:0030163)	0.350091	0.463807	2.36341	FBXO2
protein polyubiquitination (GO:0000209)	0.351691	0.464441	1.43995	PSMB3;CDC26;FBXO2
cilium assembly (GO:0060271)	0.351691	0.464441	1.43995	ARL3;TEKT2;DYNLRB2
antigen receptor-mediated signaling pathway (GO:0050851)	0.352276	0.464441	1.62966	PSMB3;SKAP1
endoplasmic reticulum to Golgi vesicle-mediated transport (GO:0006888)	0.352276	0.464441	1.62966	DCTN6;SPTBN2
regulation of cell-matrix adhesion (GO:0001952)	0.35446	0.464509	2.32636	SKAP1
regulation of cellular catabolic process (GO:0031329)	0.35446	0.464509	2.32636	MTMR4
regulation of RNA metabolic process (GO:0051252)	0.35446	0.464509	2.32636	NOVA1
steroid biosynthetic process (GO:0006694)	0.35446	0.464509	2.32636	HSD11B1
mitotic G1 DNA damage checkpoint signaling (GO:0031571)	0.35446	0.464509	2.32636	RGCC
negative regulation of G2/M transition of mitotic cell cycle (GO:0010972)	0.358799	0.467383	2.29046	PSMB3
cell-cell junction assembly (GO:0007043)	0.358799	0.467383	2.29046	RAMP2
embryonic organ development (GO:0048568)	0.358799	0.467383	2.29046	RBP4
positive regulation of cell cycle (GO:0045787)	0.358799	0.467383	2.29046	RGCC
positive regulation of cell death (GO:0010942)	0.358799	0.467383	2.29046	HBB
peptidyl-threonine modification (GO:0018210)	0.363109	0.472432	2.25564	CSNK2B
negative regulation of transforming growth factor beta receptor signaling pathway (GO:0030512)	0.367391	0.476296	2.22186	MTMR4
regulation of tyrosine phosphorylation of STAT protein (GO:0042509)	0.367391	0.476296	2.22186	IL6
positive regulation of protein localization to nucleus (GO:1900182)	0.367391	0.476296	2.22186	TFRC
negative regulation of cellular catabolic process (GO:0031330)	0.371644	0.479526	2.18908	LEPR
cellular response to decreased oxygen levels (GO:0036294)	0.371644	0.479526	2.18908	RGCC
RNA 3'-end processing (GO:0031123)	0.371644	0.479526	2.18908	DDX39A
positive regulation of protein polymerization (GO:0032273)	0.371644	0.479526	2.18908	CCL26
neutrophil chemotaxis (GO:0030593)	0.375868	0.482121	2.15724	CCL26
defense response to Gram-positive bacterium (GO:0050830)	0.375868	0.482121	2.15724	IL6
DNA-templated transcription, termination (GO:0006353)	0.375868	0.482121	2.15724	POLR2H
positive regulation of cell-substrate adhesion (GO:0010811)	0.375868	0.482121	2.15724	SKAP1
kidney development (GO:0001822)	0.375868	0.482121	2.15724	ARL3
protein localization to membrane (GO:0072657)	0.376362	0.482186	1.54443	RAMP2;ARL3
regulation of endopeptidase activity (GO:0052548)	0.380065	0.483517	2.12632	SERPINE1
regulation of G1/S transition of mitotic cell cycle (GO:2000045)	0.380065	0.483517	2.12632	RGCC
regulation of hematopoietic stem cell differentiation (GO:1902036)	0.380065	0.483517	2.12632	PSMB3
positive regulation of cellular protein localization (GO:1903829)	0.380065	0.483517	2.12632	TFRC
response to metal ion (GO:0010038)	0.380065	0.483517	2.12632	MT1A
myeloid leukocyte differentiation (GO:0002573)	0.380065	0.483517	2.12632	BATF3
negative regulation of epithelial cell proliferation (GO:0050680)	0.384233	0.486546	2.09626	RGCC
cytoskeleton-dependent cytokinesis (GO:0061640)	0.384233	0.486546	2.09626	ARL3
positive regulation of protein secretion (GO:0050714)	0.384233	0.486546	2.09626	RBP4
positive regulation of secretion by cell (GO:1903532)	0.384233	0.486546	2.09626	RGCC
regulation of macromolecule metabolic process (GO:0060255)	0.38827	0.487257	1.50505	NOVA1;MTMR4
negative regulation of cell adhesion (GO:0007162)	0.388373	0.487257	2.06704	SERPINE1
antigen processing and presentation of exogenous peptide antigen via MHC class I, TAP-dependent (GO:0002479)	0.388373	0.487257	2.06704	PSMB3
regulation of actin filament polymerization (GO:0030833)	0.388373	0.487257	2.06704	CCL26
endoplasmic reticulum organization (GO:0007029)	0.388373	0.487257	2.06704	TRDN
granulocyte chemotaxis (GO:0071621)	0.388373	0.487257	2.06704	CCL26
response to molecule of bacterial origin (GO:0002237)	0.388373	0.487257	2.06704	IL6
ubiquitin-dependent ERAD pathway (GO:0030433)	0.388373	0.487257	2.06704	FBXO2
NIK/NF-kappaB signaling (GO:0038061)	0.392486	0.490158	2.03862	PSMB3
DNA damage response, signal transduction by p53 class mediator (GO:0030330)	0.392486	0.490158	2.03862	RGCC
regulation of stress fiber assembly (GO:0051492)	0.392486	0.490158	2.03862	RGCC
mitotic nuclear division (GO:0140014)	0.392486	0.490158	2.03862	CHMP2A
regulation of hematopoietic progenitor cell differentiation (GO:1901532)	0.396572	0.493169	2.01097	PSMB3
regulation of transcription from RNA polymerase II promoter in response to hypoxia (GO:0061418)	0.396572	0.493169	2.01097	PSMB3
positive regulation of immune response (GO:0050778)	0.396572	0.493169	2.01097	SKAP1
positive regulation of transcription, DNA-templated (GO:0045893)	0.396709	0.493169	1.14636	IL6;RGCC;SERPINE1;RASL11A;TET3;MRTFB;ADIRF;TET1;SKAP1
proteasomal protein catabolic process (GO:0010498)	0.400079	0.493478	1.46761	UBXN1;PSMB3
regulation of BMP signaling pathway (GO:0030510)	0.40063	0.493478	1.98406	FST
cellular response to hormone stimulus (GO:0032870)	0.40063	0.493478	1.98406	RAMP2
phospholipid metabolic process (GO:0006644)	0.40063	0.493478	1.98406	ACP6
positive regulation of interleukin-6 production (GO:0032755)	0.40063	0.493478	1.98406	IL6
RNA transport (GO:0050658)	0.40063	0.493478	1.98406	DDX39A
regulation of inflammatory response (GO:0050727)	0.402428	0.493478	1.46034	IL6;SERPINE1
purine ribonucleotide metabolic process (GO:0009150)	0.404661	0.493478	1.95786	GLYAT
negative regulation of developmental process (GO:0051093)	0.404661	0.493478	1.95786	TFRC
neutrophil migration (GO:1990266)	0.404661	0.493478	1.95786	CCL26
phosphatidylcholine metabolic process (GO:0046470)	0.404661	0.493478	1.95786	CSNK2B
positive regulation of endothelial cell proliferation (GO:0001938)	0.404661	0.493478	1.95786	CCL26
inorganic cation import across plasma membrane (GO:0098659)	0.404661	0.493478	1.95786	KCNJ8
positive regulation of phosphatidylinositol 3-kinase signaling (GO:0014068)	0.404661	0.493478	1.95786	HCST
positive regulation of protein modification by small protein conjugation or removal (GO:1903322)	0.404661	0.493478	1.95786	FANCI
positive regulation of tumor necrosis factor production (GO:0032760)	0.404661	0.493478	1.95786	IL6
positive regulation of type I interferon production (GO:0032481)	0.404661	0.493478	1.95786	POLR2H
protein modification process (GO:0036211)	0.408665	0.496692	1.93233	FBXO2
negative regulation of blood vessel morphogenesis (GO:2000181)	0.408665	0.496692	1.93233	RGCC
antigen processing and presentation of exogenous peptide antigen via MHC class I (GO:0042590)	0.408665	0.496692	1.93233	PSMB3
recombinational repair (GO:0000725)	0.412643	0.499853	1.90746	NUCKS1
regulation of ion transport (GO:0043269)	0.412643	0.499853	1.90746	KCNJ8
mRNA 3'-end processing (GO:0031124)	0.412643	0.499853	1.90746	DDX39A
phosphate-containing compound metabolic process (GO:0006796)	0.416432	0.501848	1.41818	ISYNA1;ACP6
negative regulation of cellular component organization (GO:0051129)	0.416594	0.501848	1.88322	HSPA2
negative regulation of extrinsic apoptotic signaling pathway (GO:2001237)	0.416594	0.501848	1.88322	SERPINE1
glycerophospholipid metabolic process (GO:0006650)	0.416594	0.501848	1.88322	ACP6
response to interferon-gamma (GO:0034341)	0.416594	0.501848	1.88322	CCL26
positive regulation of cellular amide metabolic process (GO:0034250)	0.420518	0.505457	1.85959	IL6
positive regulation of tumor necrosis factor superfamily cytokine production (GO:1903557)	0.420518	0.505457	1.85959	IL6
negative regulation of multicellular organismal process (GO:0051241)	0.421064	0.505555	1.40466	RGCC;NOVA1
ubiquitin-dependent protein catabolic process (GO:0006511)	0.42409	0.506787	1.27324	UBXN1;PSMB3;CDC26
regulation of cyclin-dependent protein serine/threonine kinase activity (GO:0000079)	0.424416	0.506787	1.83654	RGCC
regulation of gene expression, epigenetic (GO:0040029)	0.424416	0.506787	1.83654	POLR2H
positive regulation of cytoskeleton organization (GO:0051495)	0.424416	0.506787	1.83654	CCL26
positive regulation of protein ubiquitination (GO:0031398)	0.424416	0.506787	1.83654	FANCI
extracellular structure organization (GO:0043062)	0.425677	0.507736	1.39139	SERPINE1;ICAM3
external encapsulating structure organization (GO:0045229)	0.427977	0.508068	1.38485	SERPINE1;ICAM3
regulation of interleukin-1 beta production (GO:0032651)	0.428289	0.508068	1.81405	IL6
regulation of osteoblast differentiation (GO:0045667)	0.428289	0.508068	1.81405	IL6
positive regulation of plasma membrane bounded cell projection assembly (GO:0120034)	0.428289	0.508068	1.81405	MIEN1
long-chain fatty acid metabolic process (GO:0001676)	0.428289	0.508068	1.81405	EPHX1
nuclear export (GO:0051168)	0.432135	0.511466	1.7921	DDX39A
lymphocyte differentiation (GO:0030098)	0.432135	0.511466	1.7921	LEPR
cellular response to lipid (GO:0071396)	0.432562	0.511466	1.37195	IL6;SERPINE1
Wnt signaling pathway, planar cell polarity pathway (GO:0060071)	0.435956	0.51492	1.77068	PSMB3
positive regulation of cell motility (GO:2000147)	0.437128	0.515744	1.35928	MIEN1;CCL26
response to interleukin-1 (GO:0070555)	0.439751	0.518278	1.74976	CCL26
ERAD pathway (GO:0036503)	0.443521	0.52152	1.72932	FBXO2
regulation of transcription from RNA polymerase II promoter in response to stress (GO:0043618)	0.443521	0.52152	1.72932	PSMB3
regulation of I-kappaB kinase/NF-kappaB signaling (GO:0043122)	0.443939	0.52152	1.3407	TFRC;S100A13
regulation of establishment of planar polarity (GO:0090175)	0.447266	0.523734	1.70936	PSMB3
retrograde transport, endosome to Golgi (GO:0042147)	0.447266	0.523734	1.70936	RAB9B
metal ion transport (GO:0030001)	0.447266	0.523734	1.70936	RAMP2
protein transport (GO:0015031)	0.450591	0.526391	1.22012	RAMP2;TFRC;CHMP2A
collagen fibril organization (GO:0030199)	0.450985	0.526391	1.68985	DPT
regulation of type I interferon production (GO:0032479)	0.450985	0.526391	1.68985	POLR2H
cilium organization (GO:0044782)	0.45295	0.527313	1.31671	ARL3;TEKT2
negative regulation of translation (GO:0017148)	0.45468	0.527313	1.67078	EIF4EBP3
regulation of mRNA splicing, via spliceosome (GO:0048024)	0.45468	0.527313	1.67078	NOVA1
positive regulation of binding (GO:0051099)	0.45468	0.527313	1.67078	TXN
mitochondrial respiratory chain complex assembly (GO:0033108)	0.45468	0.527313	1.67078	SURF1
protein complex oligomerization (GO:0051259)	0.45468	0.527313	1.67078	CHMP2A
inflammatory response (GO:0006954)	0.457425	0.529314	1.30502	IL6;CCL26
regulation of stem cell differentiation (GO:2000736)	0.45835	0.529314	1.65213	PSMB3
toll-like receptor signaling pathway (GO:0002224)	0.45835	0.529314	1.65213	S100A1
positive regulation of supramolecular fiber organization (GO:1902905)	0.45835	0.529314	1.65213	CCL26
regulation of autophagy (GO:0010506)	0.459654	0.530258	1.29926	LEPR;MTMR4
regulation of lipid metabolic process (GO:0019216)	0.461996	0.53071	1.63389	ANGPTL8
regulation of peptidyl-tyrosine phosphorylation (GO:0050730)	0.461996	0.53071	1.63389	IL6
T cell activation (GO:0042110)	0.461996	0.53071	1.63389	LEPR
positive regulation of transmembrane receptor protein serine/threonine kinase signaling pathway (GO:0090100)	0.461996	0.53071	1.63389	CSNK2B
negative regulation of cell death (GO:0060548)	0.469214	0.536738	1.59859	CHMP2A
positive regulation of epithelial cell migration (GO:0010634)	0.469214	0.536738	1.59859	GLIPR2
hemopoiesis (GO:0030097)	0.469214	0.536738	1.59859	FST
interleukin-1-mediated signaling pathway (GO:0070498)	0.469214	0.536738	1.59859	PSMB3
negative regulation of programmed cell death (GO:0043069)	0.471439	0.538716	1.18066	IL6;MIEN1;TFRC
regulation of ERK1 and ERK2 cascade (GO:0070372)	0.475112	0.542345	1.26027	GLIPR2;CCL26
calcium ion homeostasis (GO:0055074)	0.479862	0.54548	1.5484	TRDN
double-strand break repair via homologous recombination (GO:0000724)	0.479862	0.54548	1.5484	NUCKS1
positive regulation of cold-induced thermogenesis (GO:0120162)	0.479862	0.54548	1.5484	LEPR
glycosaminoglycan biosynthetic process (GO:0006024)	0.479862	0.54548	1.5484	SDC4
positive regulation of defense response (GO:0031349)	0.483364	0.548888	1.53236	SERPINE1
negative regulation of transcription by RNA polymerase II (GO:0000122)	0.485792	0.551071	1.09526	BATF3;FST;CREM;RTF1;TAF3
organic anion transport (GO:0015711)	0.486842	0.551114	1.51665	HBB
mRNA-containing ribonucleoprotein complex export from nucleus (GO:0071427)	0.486842	0.551114	1.51665	DDX39A
cell-matrix adhesion (GO:0007160)	0.490298	0.5533	1.50125	CD63
organic acid transport (GO:0015849)	0.490298	0.5533	1.50125	SLC7A4
regulation of transforming growth factor beta receptor signaling pathway (GO:0017015)	0.490298	0.5533	1.50125	MTMR4
positive regulation of cell cycle process (GO:0090068)	0.49373	0.556596	1.48617	RGCC
regulation of proteasomal ubiquitin-dependent protein catabolic process (GO:0032434)	0.497139	0.559281	1.47138	UBXN1
positive regulation of cellular protein metabolic process (GO:0032270)	0.497139	0.559281	1.47138	IL6
cellular metal ion homeostasis (GO:0006875)	0.503889	0.565124	1.44266	TRDN
steroid metabolic process (GO:0008202)	0.503889	0.565124	1.44266	HSD11B1
mRNA transport (GO:0051028)	0.503889	0.565124	1.44266	DDX39A
positive regulation of cellular metabolic process (GO:0031325)	0.507231	0.567809	1.42872	CD63
positive regulation of phosphorylation (GO:0042327)	0.507326	0.567809	1.18405	TFRC;LEPR
chromosome organization (GO:0051276)	0.510549	0.567915	1.41504	NUCKS1
regulation of phosphatidylinositol 3-kinase signaling (GO:0014066)	0.510549	0.567915	1.41504	HCST
RNA export from nucleus (GO:0006405)	0.510549	0.567915	1.41504	DDX39A
small GTPase mediated signal transduction (GO:0007264)	0.510549	0.567915	1.41504	ARL3
positive regulation of protein serine/threonine kinase activity (GO:0071902)	0.510549	0.567915	1.41504	RGCC
protein localization to nucleus (GO:0034504)	0.510549	0.567915	1.41504	TAF3
mRNA export from nucleus (GO:0006406)	0.513846	0.570999	1.40162	DDX39A
regulation of cell migration (GO:0030334)	0.516994	0.57391	1.10042	MIEN1;SERPINE1;CCL26
lipid transport (GO:0006869)	0.520374	0.577074	1.37552	TTPA
response to tumor necrosis factor (GO:0034612)	0.523605	0.580067	1.36283	CCL26
Fc-epsilon receptor signaling pathway (GO:0038095)	0.526814	0.582437	1.35038	PSMB3
regulation of Wnt signaling pathway (GO:0030111)	0.526814	0.582437	1.35038	RSPO3
phosphatidylinositol metabolic process (GO:0046488)	0.530002	0.584775	1.33814	MTMR4
Fc receptor signaling pathway (GO:0038093)	0.530002	0.584775	1.33814	PSMB3
positive regulation of metabolic process (GO:0009893)	0.533169	0.587673	1.32613	LEPR
regulation of protein phosphorylation (GO:0001932)	0.534196	0.588164	1.125	TFRC;LEPR
activation of protein kinase activity (GO:0032147)	0.536315	0.588164	1.31433	TXN
negative regulation of cell motility (GO:2000146)	0.536315	0.588164	1.31433	SERPINE1
positive regulation of cellular component organization (GO:0051130)	0.536315	0.588164	1.31433	TFRC
response to lipid (GO:0033993)	0.536315	0.588164	1.31433	RBP4
calcium ion transport (GO:0006816)	0.539439	0.590401	1.30273	RAMP2
cellular amide metabolic process (GO:0043603)	0.539439	0.590401	1.30273	GLYAT
cytosolic transport (GO:0016482)	0.542543	0.592607	1.29134	RAB9B
regulation of protein-containing complex assembly (GO:0043254)	0.542543	0.592607	1.29134	TFRC
organelle assembly (GO:0070925)	0.544592	0.594249	1.05517	ARL3;TEKT2;CHMP2A
adenylate cyclase-activating G protein-coupled receptor signaling pathway (GO:0007189)	0.548688	0.597521	1.26913	RAMP2
negative regulation of response to external stimulus (GO:0032102)	0.548688	0.597521	1.26913	SERPINE1
inorganic cation transmembrane transport (GO:0098662)	0.550232	0.598604	1.09147	KCNG2;KCNJ8
cellular response to interferon-gamma (GO:0071346)	0.557752	0.605355	1.23722	CCL26
protein homooligomerization (GO:0051260)	0.557752	0.605355	1.23722	CHMP2A
plasma membrane bounded cell projection assembly (GO:0120031)	0.558105	0.605355	1.07543	ARL3;TEKT2
regulation of mRNA catabolic process (GO:0061013)	0.560733	0.6076	1.22693	PSMB3
regulation of anatomical structure morphogenesis (GO:0022603)	0.563694	0.608991	1.21681	IL6
cellular response to organic substance (GO:0071310)	0.563694	0.608991	1.21681	RAMP2
positive regulation of epithelial cell proliferation (GO:0050679)	0.563694	0.608991	1.21681	CCL26
non-canonical Wnt signaling pathway (GO:0035567)	0.566636	0.610957	1.20686	PSMB3
defense response to symbiont (GO:0140546)	0.566636	0.610957	1.20686	IL6
negative regulation of growth (GO:0045926)	0.572459	0.616016	1.18743	MT1A
phosphatidylinositol biosynthetic process (GO:0006661)	0.572459	0.616016	1.18743	MTMR4
microtubule cytoskeleton organization involved in mitosis (GO:1902850)	0.578205	0.621585	1.16861	DCTN6
DNA-dependent DNA replication (GO:0006261)	0.58105	0.624027	1.15942	PSMB3
positive regulation of canonical Wnt signaling pathway (GO:0090263)	0.583875	0.626443	1.15038	PSMB3
cellular response to metal ion (GO:0071248)	0.586681	0.628834	1.14147	MT1A
defense response to virus (GO:0051607)	0.592237	0.633634	1.12406	IL6
regulation of cell cycle (GO:0051726)	0.592323	0.633634	1.00866	RGCC;CDC26
positive regulation of peptidyl-tyrosine phosphorylation (GO:0050731)	0.594988	0.63586	1.11555	IL6
protein localization to plasma membrane (GO:0072659)	0.600433	0.639796	1.09891	RAMP2
cellular calcium ion homeostasis (GO:0006874)	0.600433	0.639796	1.09891	TRDN
ribonucleoprotein complex assembly (GO:0022618)	0.600433	0.639796	1.09891	LUC7L3
MAPK cascade (GO:0000165)	0.605091	0.64413	0.984848	PSMB3;SPTBN2
positive regulation of cellular process (GO:0048522)	0.606517	0.645017	0.953549	IL6;S100A13;HBB;TET1
regulation of cellular component organization (GO:0051128)	0.608465	0.645827	1.07486	TFRC
protein dephosphorylation (GO:0006470)	0.608465	0.645827	1.07486	MTMR4
chromatin organization (GO:0006325)	0.616337	0.65291	1.05183	NUCKS1
protein localization to organelle (GO:0033365)	0.616337	0.65291	1.05183	ARL3
positive regulation of cell population proliferation (GO:0008284)	0.618817	0.653745	0.943016	IL6;S100A13;TET1
protein-DNA complex assembly (GO:0065004)	0.618926	0.653745	1.04437	PSMB3
negative regulation of DNA-binding transcription factor activity (GO:0043433)	0.618926	0.653745	1.04437	TAF3
negative regulation of cell migration (GO:0030336)	0.621498	0.655825	1.03702	SERPINE1
regulation of transcription by RNA polymerase II (GO:0006357)	0.6264	0.659919	0.940678	BATF3;FST;SERPINE1;MRTFB;CREM;ADIRF;TET1;NUCKS1;RTF1;IL6;RGCC;TET3;TAF3;SKAP1
regulation of mRNA stability (GO:0043488)	0.626589	0.659919	1.02261	PSMB3
cellular response to cytokine stimulus (GO:0071345)	0.630139	0.663016	0.926883	IL6;LEPR;CCL26
regulation of G2/M transition of mitotic cell cycle (GO:0010389)	0.6341	0.665491	1.00173	PSMB3
positive regulation of hydrolase activity (GO:0051345)	0.6341	0.665491	1.00173	CCL26
negative regulation of apoptotic process (GO:0043066)	0.634325	0.665491	0.920972	IL6;MIEN1;TFRC
brain development (GO:0007420)	0.63657	0.667203	0.994954	ROGDI
cellular response to oxygen-containing compound (GO:1901701)	0.639913	0.670062	0.922543	IL6;SERPINE1
mitotic spindle organization (GO:0007052)	0.653402	0.68353	0.949971	DCTN6
cellular response to growth factor stimulus (GO:0071363)	0.655742	0.684007	0.943872	RAMP2
organonitrogen compound biosynthetic process (GO:1901566)	0.655742	0.684007	0.943872	CSNK2B
skeletal system development (GO:0001501)	0.655742	0.684007	0.943872	RBP4
positive regulation of protein kinase B signaling (GO:0051897)	0.66267	0.690572	0.926034	TXN
negative regulation of canonical Wnt signaling pathway (GO:0090090)	0.671693	0.697971	0.903264	PSMB3
adenylate cyclase-modulating G protein-coupled receptor signaling pathway (GO:0007188)	0.671693	0.697971	0.903264	RAMP2
regulation of neuron projection development (GO:0010975)	0.671693	0.697971	0.903264	RTN4IP1
regulation of MAPK cascade (GO:0043408)	0.673911	0.699608	0.897744	IL6
supramolecular fiber organization (GO:0097435)	0.684581	0.710008	0.847313	DPT;TRDN
protein ubiquitination (GO:0016567)	0.687009	0.711849	0.848644	PSMB3;FBXO2;RTF1
cellular protein modification process (GO:0006464)	0.689396	0.713643	0.86698	IL6;PSMB3;FBXO2;PENK;MTMR4;HCST
regulation of GTPase activity (GO:0043087)	0.721012	0.745662	0.786994	CCL26
negative regulation of cell differentiation (GO:0045596)	0.724774	0.748131	0.778631	IL6
negative regulation of Wnt signaling pathway (GO:0030178)	0.724774	0.748131	0.778631	PSMB3
negative regulation of macromolecule metabolic process (GO:0010605)	0.730322	0.753144	0.766411	TET1
regulation of gene expression (GO:0010468)	0.735874	0.758152	0.82099	IL6;RAMP2;RGCC;TFRC;NOVA1;CREM
modification-dependent protein catabolic process (GO:0019941)	0.742839	0.764604	0.739323	CDC26
axon guidance (GO:0007411)	0.746308	0.76745	0.731929	SPTBN2
regulation of protein kinase B signaling (GO:0051896)	0.753108	0.773712	0.717571	TXN
mitotic cell cycle phase transition (GO:0044772)	0.75644	0.775977	0.710599	CHMP2A
transmembrane receptor protein tyrosine kinase signaling pathway (GO:0007169)	0.756738	0.775977	0.733605	POLR2G;POLR2H
protein modification by small protein conjugation (GO:0032446)	0.762759	0.781415	0.724406	FBXO2;RTF1
positive regulation of GTPase activity (GO:0043547)	0.764575	0.782539	0.693741	CCL26
negative regulation of transcription, DNA-templated (GO:0045892)	0.76692	0.784202	0.777783	BATF3;FST;CREM;RTF1;TAF3
regulation of cell growth (GO:0001558)	0.769326	0.785925	0.684002	TFRC
apoptotic process (GO:0006915)	0.790269	0.806564	0.641909	GSDMA
regulation of intracellular signal transduction (GO:1902531)	0.794152	0.809767	0.676803	CSNK2B;TAF3
axonogenesis (GO:0007409)	0.802725	0.817743	0.617454	SPTBN2
regulation of canonical Wnt signaling pathway (GO:0060828)	0.819431	0.833981	0.585213	PSMB3
regulation of cellular macromolecule biosynthetic process (GO:2000112)	0.824608	0.838467	0.630771	CREM;NUCKS1
protein-containing complex assembly (GO:0065003)	0.835854	0.848317	0.554017	CSNK2B
protein deubiquitination (GO:0016579)	0.835854	0.848317	0.554017	PSMB3
central nervous system development (GO:0007417)	0.836968	0.848658	0.551913	ROGDI
protein modification by small protein removal (GO:0070646)	0.845619	0.856632	0.535639	PSMB3
protein phosphorylation (GO:0006468)	0.848599	0.858852	0.59416	CSNK2B;HCST
positive regulation of programmed cell death (GO:0043068)	0.855795	0.86533	0.516581	IL6
proteolysis (GO:0006508)	0.856775	0.865517	0.514748	FBXO2
positive regulation of nucleic acid-templated transcription (GO:1903508)	0.860197	0.868169	0.576204	IL6;SKAP1
innate immune response (GO:0045087)	0.870708	0.877964	0.488722	BPI
positive regulation of apoptotic process (GO:0043065)	0.87758	0.884075	0.475874	IL6
regulation of apoptotic process (GO:0042981)	0.878521	0.884204	0.592724	IL6;MIEN1;TFRC
negative regulation of gene expression (GO:0010629)	0.887214	0.89213	0.457803	RGCC
cellular protein localization (GO:0034613)	0.892483	0.896599	0.447873	CD63
phosphorylation (GO:0016310)	0.933879	0.937322	0.366838	HCST
organelle organization (GO:0006996)	0.94236	0.944963	0.348969	CHMP2A
regulation of nucleic acid-templated transcription (GO:1903506)	0.946186	0.947927	0.340659	CREM
nervous system development (GO:0007399)	0.952121	0.952996	0.327388	ROGDI
regulation of transcription, DNA-templated (GO:0006355)	0.99951	0.99951	0.305144	IL6;BATF3;CREM;NUCKS1;SKAP1

## Sheet: KEGG_Up
Supplementary File S3. Functional enrichment analysis results of down-regulated genes in fat-tailed breed. Marked cells are significant terms (Blue at p-value <0.05 and Yellow at FDR<0.05).
Term	P-value	Adjusted P-value	Odds Ratio	Genes Up
Measles	0.00245986	0.200893	5.70751	IL6;CSNK2B;HSPA6;HSPA2;RAB9B
Ribosome	0.00425874	0.200893	4.99392	RPL36AL;RPL22;RPL37A;RPL36;RPL36A
Coronavirus disease	0.00478317	0.200893	4.07356	IL6;RPL36AL;RPL22;RPL37A;RPL36;RPL36A
Legionellosis	0.0066096	0.208202	8.40204	IL6;HSPA6;HSPA2
Huntington disease	0.0171965	0.38322	3.05719	DCTN6;DNAH12;DNAH11;PSMB3;POLR2G;POLR2H
RNA polymerase	0.0182486	0.38322	10.3642	POLR2G;POLR2H
African trypanosomiasis	0.0254653	0.387849	8.58485	IL6;HBB
Salmonella infection	0.0262889	0.387849	3.11698	DCTN6;IL6;DYNLRB2;TXN;RAB9B
Protein processing in endoplasmic reticulum	0.0281253	0.387849	3.62948	UBXN1;FBXO2;HSPA6;HSPA2
Ferroptosis	0.0308159	0.387849	7.7028	TFRC;FTH1
Prion disease	0.036894	0.387849	2.83437	IL6;PSMB3;CSNK2B;HSPA6;HSPA2
HIF-1 signaling pathway	0.036938	0.387849	4.26905	IL6;TFRC;SERPINE1
Pathways of neurodegeneration	0.0409914	0.397301	2.28458	DCTN6;DNAH12;DNAH11;IL6;PSMB3;CSNK2B;SPTBN2
Malaria	0.0442845	0.39856	6.25568	IL6;HBB
Mineral absorption	0.0613013	0.514931	5.1745	MT1A;FTH1
Cytosolic DNA-sensing pathway	0.066778	0.525877	4.91927	IL6;POLR2H
Inositol phosphate metabolism	0.0861141	0.606937	4.22429	ISYNA1;MTMR4
Endocytosis	0.0895665	0.606937	2.434	TFRC;HSPA6;CHMP2A;HSPA2
Metabolism of xenobiotics by cytochrome P450	0.0922082	0.606937	4.05242	HSD11B1;EPHX1
Antigen processing and presentation	0.0963391	0.606937	3.94537	HSPA6;HSPA2
Phenylalanine metabolism	0.108035	0.627474	9.32801	GLYAT
Cardiac muscle contraction	0.115542	0.627474	3.52602	TNNC1;TRDN
PD-L1 expression and PD-1 checkpoint pathway in cancer	0.119934	0.627474	3.44462	BATF3;CSNK2B
Hypertrophic cardiomyopathy	0.122145	0.627474	3.4053	IL6;TNNC1
RNA transport	0.129317	0.627474	2.46315	EIF5B;EIF1AX;EIF4EBP3
Hematopoietic cell lineage	0.142471	0.627474	3.08794	IL6;TFRC
AGE-RAGE signaling pathway in diabetic complications	0.144772	0.627474	3.05628	IL6;SERPINE1
Viral protein interaction with cytokine and cytokine receptor	0.144772	0.627474	3.05628	IL6;CCL26
Chagas disease	0.149398	0.627474	2.99485	IL6;SERPINE1
Longevity regulating pathway	0.149398	0.627474	2.99485	HSPA6;HSPA2
Insulin resistance	0.163449	0.66434	2.82447	GYS2;IL6
Toxoplasmosis	0.172943	0.665435	2.72121	HSPA6;HSPA2
Lipid and atherosclerosis	0.17515	0.665435	2.12307	IL6;HSPA6;HSPA2
Glyoxylate and dicarboxylate metabolism	0.18276	0.665435	5.14312	HYI
AMPK signaling pathway	0.192185	0.665435	2.5357	GYS2;LEPR
Starch and sucrose metabolism	0.21512	0.665435	4.26015	GYS2
Natural killer cell mediated cytotoxicity	0.219059	0.665435	2.31818	SH2D1A;HCST
Amyotrophic lateral sclerosis	0.22791	0.665435	1.66718	DCTN6;DNAH12;DNAH11;PSMB3
Estrogen signaling pathway	0.233856	0.665435	2.21448	HSPA6;HSPA2
Fluid shear stress and atherosclerosis	0.238803	0.665435	2.18193	SDC4;TXN
Ubiquitin mediated proteolysis	0.241278	0.665435	2.16601	CDC26;FBXO2
Graft-versus-host disease	0.246207	0.665435	3.63561	IL6
Spinocerebellar ataxia	0.248712	0.665435	2.1196	PSMB3;SPTBN2
Vasopressin-regulated water reabsorption	0.256295	0.665435	3.46617	DCTN6
Cell adhesion molecules	0.261116	0.665435	2.04649	SDC4;ICAM3
Basal transcription factors	0.261289	0.665435	3.38722	TAF3
Adrenergic signaling in cardiomyocytes	0.266081	0.665435	2.01863	TNNC1;CREM
Spliceosome	0.266081	0.665435	2.01863	HSPA6;HSPA2
Proteasome	0.266249	0.665435	3.31178	PSMB3
Intestinal immune network for IgA production	0.276071	0.665435	3.17053	IL6
Non-alcoholic fatty liver disease	0.278491	0.665435	1.95217	IL6;LEPR
Cellular senescence	0.280972	0.665435	1.93939	IL6;SERPINE1
Cholesterol metabolism	0.285763	0.665435	3.04082	ANGPTL8
Necroptosis	0.28841	0.665435	1.90205	FTH1;CHMP2A
JAK-STAT signaling pathway	0.295841	0.665435	1.8661	IL6;LEPR
Fanconi anemia pathway	0.304761	0.665435	2.81075	FANCI
Wnt signaling pathway	0.305731	0.665435	1.82021	CSNK2B;RSPO3
Regulation of lipolysis in adipocytes	0.309432	0.665435	2.75856	PTGS1
Hedgehog signaling pathway	0.314072	0.665435	2.70827	SCUBE2
Cytokine-cytokine receptor interaction	0.316874	0.665435	1.53514	IL6;LEPR;CCL26
Steroid hormone biosynthesis	0.336809	0.684484	2.48195	HSD11B1
Arachidonic acid metabolism	0.336809	0.684484	2.48195	PTGS1
NOD-like receptor signaling pathway	0.342552	0.685104	1.66641	IL6;TXN
Inflammatory bowel disease	0.35446	0.693162	2.32636	IL6
Aminoacyl-tRNA biosynthesis	0.358799	0.693162	2.29046	PARS2
Mitophagy	0.367391	0.693162	2.22186	CSNK2B
Adipocytokine signaling pathway	0.371644	0.693162	2.18908	LEPR
Adherens junction	0.380065	0.693162	2.12632	CSNK2B
p53 signaling pathway	0.388373	0.693162	2.06704	SERPINE1
Proteoglycans in cancer	0.400079	0.693162	1.46761	CD63;SDC4
Pertussis	0.40063	0.693162	1.98406	IL6
RNA degradation	0.412643	0.693162	1.90746	EXOSC10
Human T-cell leukemia virus 1 infection	0.432562	0.693162	1.37195	IL6;CDC26
Complement and coagulation cascades	0.435956	0.693162	1.77068	SERPINE1
ECM-receptor interaction	0.447266	0.693162	1.70936	SDC4
Alzheimer disease	0.450591	0.693162	1.22012	IL6;PSMB3;CSNK2B
Bile secretion	0.45468	0.693162	1.67078	EPHX1
Rheumatoid arthritis	0.465617	0.693162	1.61605	IL6
TGF-beta signaling pathway	0.469214	0.693162	1.59859	FST
IL-17 signaling pathway	0.469214	0.693162	1.59859	IL6
Dilated cardiomyopathy	0.476336	0.693162	1.56478	TNNC1
Chemical carcinogenesis	0.477299	0.693162	1.25489	HSD11B1;EPHX1
Calcium signaling pathway	0.47948	0.693162	1.24955	TNNC1;TRDN
Phosphatidylinositol signaling system	0.479862	0.693162	1.5484	MTMR4
Progesterone-mediated oocyte maturation	0.490298	0.693162	1.50125	CDC26
Amoebiasis	0.497139	0.693162	1.47138	IL6
Parkinson disease	0.49886	0.693162	1.20347	PSMB3;TXN
Toll-like receptor signaling pathway	0.503889	0.693162	1.44266	IL6
C-type lectin receptor signaling pathway	0.503889	0.693162	1.44266	IL6
NF-kappa B signaling pathway	0.503889	0.693162	1.44266	CSNK2B
Th17 cell differentiation	0.513846	0.693162	1.40162	IL6
Glucagon signaling pathway	0.513846	0.693162	1.40162	GYS2
Drug metabolism	0.517121	0.693162	1.38845	FMO2
Ribosome biogenesis in eukaryotes	0.517121	0.693162	1.38845	CSNK2B
TNF signaling pathway	0.530002	0.699785	1.33814	IL6
Serotonergic synapse	0.533169	0.699785	1.32613	PTGS1
Cell cycle	0.566636	0.710226	1.20686	CDC26
Platelet activation	0.566636	0.710226	1.20686	PTGS1
Lysosome	0.578205	0.710226	1.16861	CD63
Oocyte meiosis	0.58105	0.710226	1.15942	CDC26
FoxO signaling pathway	0.586681	0.710226	1.14147	IL6
MAPK signaling pathway	0.588619	0.710226	1.01567	HSPA6;HSPA2
Vascular smooth muscle contraction	0.592237	0.710226	1.12406	RAMP2
Apelin signaling pathway	0.603129	0.710226	1.09078	SERPINE1
Autophagy	0.603129	0.710226	1.09078	MTMR4
Yersinia infection	0.603129	0.710226	1.09078	IL6
Insulin signaling pathway	0.603129	0.710226	1.09078	GYS2
Phagosome	0.64146	0.74837	0.981676	TFRC
Hepatitis B	0.664949	0.759595	0.920235	IL6
Hippo signaling pathway	0.667212	0.759595	0.914508	SERPINE1
Neuroactive ligand-receptor interaction	0.669167	0.759595	0.872754	PENK;LEPR
cGMP-PKG signaling pathway	0.676114	0.760628	0.892291	KCNJ8
Influenza A	0.68691	0.761626	0.865981	IL6
PI3K-Akt signaling pathway	0.68909	0.761626	0.839962	GYS2;IL6
Tuberculosis	0.703445	0.770731	0.826942	IL6
Transcriptional misregulation in cancer	0.726635	0.777147	0.774515	IL6
Chemokine signaling pathway	0.726635	0.777147	0.774515	CCL26
Kaposi sarcoma-associated herpesvirus infection	0.728485	0.777147	0.770442	IL6
Pathogenic Escherichia coli infection	0.735759	0.777147	0.754565	IL6
Epstein-Barr virus infection	0.744579	0.777147	0.735608	IL6
Diabetic cardiomyopathy	0.746308	0.777147	0.731929	GYS2
Rap1 signaling pathway	0.758089	0.782944	0.707163	SKAP1
Regulation of actin cytoskeleton	0.770888	0.789691	0.680815	DIAPH2
Human cytomegalovirus infection	0.781535	0.794141	0.659305	IL6
Herpes simplex virus 1 infection	0.966299	0.973161	0.293021	IL6
Pathways in cancer	0.973161	0.973161	0.274308	IL6

## Sheet: BP_Down
Supplementary File S3. Functional enrichment analysis results of down-regulated genes in fat-tailed breed. Marked cells are significant terms (Blue at p-value <0.05 and Yellow at FDR<0.05).
Term	P-value	Adjusted P-value	Odds Ratio	Genes Down
extracellular matrix organization (GO:0030198)	5.32588e-13	9.55464e-10	7.9748	POSTN;MMP2;ITGA2;SERPINF2;PAPLN;ITGA1;TNC;CAPG;ADAMTS16;COL1A1;GREM1;COL3A1;ADAMTS2;VCAN;COL1A2;COL5A1;ADAMTS19;MMP23B;SPP1;COL4A6;COL21A1;COL6A3;TIMP1	POSTN;MMP2;ITGA2;SERPINF2;PAPLN;ITGA1;TNC;CAPG;ADAMTS16;COL1A1;GREM1;COL3A1;ADAMTS2;VCAN;COL1A2;COL5A1;ADAMTS19;MMP23B;SPP1;COL4A6;COL21A1;COL6A3;TIMP1
extracellular structure organization (GO:0043062)	5.01802e-11	3.23983e-08	8.55594	POSTN;ITGA2;MMP2;PAPLN;ITGA1;TNC;ADAMTS16;COL1A1;COL3A1;ADAMTS2;VCAN;COL1A2;COL5A1;ADAMTS19;MMP23B;SPP1;COL4A6;COL6A3	POSTN;ITGA2;MMP2;PAPLN;ITGA1;TNC;ADAMTS16;COL1A1;COL3A1;ADAMTS2;VCAN;COL1A2;COL5A1;ADAMTS19;MMP23B;SPP1;COL4A6;COL6A3
external encapsulating structure organization (GO:0045229)	5.41778e-11	3.23983e-08	8.51251	POSTN;ITGA2;MMP2;PAPLN;ITGA1;TNC;ADAMTS16;COL1A1;COL3A1;ADAMTS2;VCAN;COL1A2;COL5A1;ADAMTS19;MMP23B;SPP1;COL4A6;COL6A3	POSTN;ITGA2;MMP2;PAPLN;ITGA1;TNC;ADAMTS16;COL1A1;COL3A1;ADAMTS2;VCAN;COL1A2;COL5A1;ADAMTS19;MMP23B;SPP1;COL4A6;COL6A3
collagen fibril organization (GO:0030199)	6.48827e-08	2.90999e-05	11.5418	GREM1;COL1A1;ADAMTS2;COL3A1;COL1A2;COL5A1;SERPINF2;COL4A6;COL21A1;COL6A3	GREM1;COL1A1;ADAMTS2;COL3A1;COL1A2;COL5A1;SERPINF2;COL4A6;COL21A1;COL6A3
actin-myosin filament sliding (GO:0033275)	2.00832e-07	6.00488e-05	20.3566	ACTA1;MYBPC1;MYH2;TNNT1;TNNC2;TNNI2;MYH7	ACTA1;MYBPC1;MYH2;TNNT1;TNNC2;TNNI2;MYH7
muscle filament sliding (GO:0030049)	2.00832e-07	6.00488e-05	20.3566	ACTA1;MYBPC1;MYH2;TNNT1;TNNC2;TNNI2;MYH7	ACTA1;MYBPC1;MYH2;TNNT1;TNNC2;TNNI2;MYH7
cytokine-mediated signaling pathway (GO:0019221)	2.37058e-06	0.000607545	3.45224	RSAD2;TNFRSF13B;CCL21;PELI3;TNFRSF9;MMP2;ALOX15;IFI6;F13A1;ISG15;IFI35;FOS;FOXO3;VEGFA;COL1A2;CCL8;MYC;SDC1;TIMP1;LBP;IL13RA2;JUNB	RSAD2;TNFRSF13B;CCL21;PELI3;TNFRSF9;MMP2;ALOX15;IFI6;F13A1;ISG15;IFI35;FOS;FOXO3;VEGFA;COL1A2;CCL8;MYC;SDC1;TIMP1;LBP;IL13RA2;JUNB
negative regulation of endopeptidase activity (GO:0010951)	6.92914e-06	0.00138121	11.2546	CRB2;SERPINB11;AHSG;SERPINF1;SERPINF2;SPOCK1;TIMP1	CRB2;SERPINB11;AHSG;SERPINF1;SERPINF2;SPOCK1;TIMP1
negative regulation of peptidase activity (GO:0010466)	6.92914e-06	0.00138121	11.2546	CRB2;SERPINB11;AHSG;SERPINF1;SERPINF2;SPOCK1;TIMP1	CRB2;SERPINB11;AHSG;SERPINF1;SERPINF2;SPOCK1;TIMP1
regulation of endopeptidase activity (GO:0052548)	1.5429e-05	0.00264638	9.84375	CRB2;SERPINB11;AHSG;SERPINF1;SERPINF2;SPOCK1;TIMP1	CRB2;SERPINB11;AHSG;SERPINF1;SERPINF2;SPOCK1;TIMP1
muscle contraction (GO:0006936)	1.62264e-05	0.00264638	6.79286	ACTA1;P2RX6;MYBPC1;MYH2;TNNT1;ITGA1;TNNC2;TNNI2;MYH7	ACTA1;P2RX6;MYBPC1;MYH2;TNNT1;ITGA1;TNNC2;TNNI2;MYH7
sprouting angiogenesis (GO:0002040)	2.56941e-05	0.00384127	11.6964	GREM1;NR4A1;RNF213;DLL1;JMJD6;VEGFA	GREM1;NR4A1;RNF213;DLL1;JMJD6;VEGFA
skin development (GO:0043588)	3.38194e-05	0.00466707	8.6262	COL1A1;COL3A1;COL1A2;COL5A1;SLC2A10;DHCR24;DLL1	COL1A1;COL3A1;COL1A2;COL5A1;SLC2A10;DHCR24;DLL1
cellular response to cytokine stimulus (GO:0071345)	3.66897e-05	0.00470152	3.37761	CCL21;DUSP1;MMP2;ALOX15;F13A1;FOS;FOXO3;VEGFA;COL1A2;CCL8;MYC;SDC1;TIMP1;LBP;IL13RA2;PTPN4;JUNB	CCL21;DUSP1;MMP2;ALOX15;F13A1;FOS;FOXO3;VEGFA;COL1A2;CCL8;MYC;SDC1;TIMP1;LBP;IL13RA2;PTPN4;JUNB
skeletal muscle contraction (GO:0003009)	6.67255e-05	0.00798038	22.25	TNNT1;TNNC2;TNNI2;MYH7	TNNT1;TNNC2;TNNI2;MYH7
collagen-activated signaling pathway (GO:0038065)	0.000113742	0.0120031	44.3229	COL1A1;ITGA2;COL4A6	COL1A1;ITGA2;COL4A6
unsaturated fatty acid biosynthetic process (GO:0006636)	0.000113742	0.0120031	44.3229	SCD;ALOX15;SCD5	SCD;ALOX15;SCD5
positive regulation of metabolic process (GO:0009893)	0.000300262	0.0299261	5.93073	ACLY;SCD;TRPV2;EBF2;ELOVL6;LPIN1;VEGFA	ACLY;SCD;TRPV2;EBF2;ELOVL6;LPIN1;VEGFA
fatty-acyl-CoA biosynthetic process (GO:0046949)	0.00034543	0.0326158	13.6854	ACLY;SCD;SCD5;ELOVL6	ACLY;SCD;SCD5;ELOVL6
macrophage activation involved in immune response (GO:0002281)	0.000374522	0.0335946	26.5883	PLCG2;IFI35;LBP	PLCG2;IFI35;LBP
skeletal system development (GO:0001501)	0.000442638	0.0368706	4.80098	COL1A1;VCAN;COL1A2;EVC;AHSG;FRZB;ZBTB16;CDH11	COL1A1;VCAN;COL1A2;EVC;AHSG;FRZB;ZBTB16;CDH11
regulation of bone mineralization (GO:0030500)	0.000457548	0.0368706	8.58075	GREM1;AHSG;TMEM119;ISG15;CCN1	GREM1;AHSG;TMEM119;ISG15;CCN1
regulation of trophoblast cell migration (GO:1901163)	0.000472699	0.0368706	24.17	ACVR1C;TIMP1;VEGFA	ACVR1C;TIMP1;VEGFA
regulation of extracellular matrix organization (GO:1903053)	0.000585962	0.0404547	22.1547	FAP;SLC2A10;AEBP1	FAP;SLC2A10;AEBP1
phosphatidylethanolamine biosynthetic process (GO:0006646)	0.000585962	0.0404547	22.1547	PHOSPHO1;ALOX15;LPIN1	PHOSPHO1;ALOX15;LPIN1
positive regulation of multicellular organismal process (GO:0051240)	0.0005863	0.0404547	3.27372	COL1A1;CRB2;SCD;ZBTB16;TRPV2;TMEM119;EBF2;ELOVL6;APOE;LBP;LPIN1;VEGFA	COL1A1;CRB2;SCD;ZBTB16;TRPV2;TMEM119;EBF2;ELOVL6;APOE;LBP;LPIN1;VEGFA
positive regulation of cold-induced thermogenesis (GO:0120162)	0.000818228	0.0532777	5.899	SCD;TRPV2;EBF2;ELOVL6;LPIN1;VEGFA	SCD;TRPV2;EBF2;ELOVL6;LPIN1;VEGFA
acyl-CoA biosynthetic process (GO:0071616)	0.000861234	0.0532777	18.9878	ACLY;SCD;SCD5	ACLY;SCD;SCD5
regulation of osteoblast proliferation (GO:0033688)	0.000861234	0.0532777	18.9878	GREM1;TMEM119;CCN1	GREM1;TMEM119;CCN1
cell-matrix adhesion (GO:0007160)	0.000959818	0.0573971	5.70986	COL3A1;CCL21;ITGA2;DLC1;ITGA1;VWA2	COL3A1;CCL21;ITGA2;DLC1;ITGA1;VWA2
cell migration involved in sprouting angiogenesis (GO:0002042)	0.0010249	0.0591244	17.7211	GREM1;NR4A1;VEGFA	GREM1;NR4A1;VEGFA
positive regulation of ossification (GO:0045778)	0.00105462	0.0591244	9.87888	ZBTB16;TMEM119;ISG15;CCN1	ZBTB16;TMEM119;ISG15;CCN1
response to fatty acid (GO:0070542)	0.00120697	0.0623998	16.6127	PPP5C;SCD;FOXO3	PPP5C;SCD;FOXO3
myeloid cell activation involved in immune response (GO:0002275)	0.00120697	0.0623998	16.6127	PLCG2;IFI35;LBP	PLCG2;IFI35;LBP
membrane depolarization during SA node cell action potential (GO:0086046)	0.00124304	0.0623998	58.8423	CACNA1D;CACNA1G	CACNA1D;CACNA1G
fatty acid biosynthetic process (GO:0006633)	0.00125217	0.0623998	6.75579	ACLY;SCD;ALOX15;SCD5;ELOVL6	ACLY;SCD;ALOX15;SCD5;ELOVL6
positive regulation of biosynthetic process (GO:0009891)	0.00151232	0.0733271	8.88919	SERPINF2;PLCG2;ZBTB20;APOE	SERPINF2;PLCG2;ZBTB20;APOE
negative regulation of reproductive process (GO:2000242)	0.00162928	0.0762821	14.7653	ACVR1C;DUSP1;TIMP1	ACVR1C;DUSP1;TIMP1
protein-DNA complex subunit organization (GO:0071824)	0.00185068	0.0762821	44.1295	MYC;TCF4	MYC;TCF4
ISG15-protein conjugation (GO:0032020)	0.00185068	0.0762821	44.1295	UBA7;ISG15	UBA7;ISG15
negative regulation of monocyte chemotaxis (GO:0090027)	0.00185068	0.0762821	44.1295	GREM1;DUSP1	GREM1;DUSP1
negative regulation of trophoblast cell migration (GO:1901164)	0.00185068	0.0762821	44.1295	ACVR1C;TIMP1	ACVR1C;TIMP1
positive regulation of osteoblast proliferation (GO:0033690)	0.00185068	0.0762821	44.1295	TMEM119;CCN1	TMEM119;CCN1
fatty-acyl-CoA metabolic process (GO:0035337)	0.00187091	0.0762821	13.9875	ACLY;SCD;SCD5	ACLY;SCD;SCD5
cellular amide metabolic process (GO:0043603)	0.00197036	0.0785517	4.92035	CPD;CPXM1;AEBP1;PLPP3;CPZ;ACSF2	CPD;CPXM1;AEBP1;PLPP3;CPZ;ACSF2
blood vessel endothelial cell migration (GO:0043534)	0.00213373	0.0832157	13.2874	GREM1;NR4A1;VEGFA	GREM1;NR4A1;VEGFA
supramolecular fiber organization (GO:0097435)	0.00225085	0.0859155	2.9244	COL1A1;GREM1;COL3A1;ADAMTS2;COL1A2;COL5A1;SERPINF2;COL4A6;COL21A1;COL6A3;CORO1A	COL1A1;GREM1;COL3A1;ADAMTS2;COL1A2;COL5A1;SERPINF2;COL4A6;COL21A1;COL6A3;CORO1A
cardiac muscle cell development (GO:0055013)	0.00241838	0.0885422	12.6541	FHOD3;PDGFRA;VEGFA	FHOD3;PDGFRA;VEGFA
negative regulation of ossification (GO:0030279)	0.00241838	0.0885422	12.6541	GREM1;AHSG;SOST	GREM1;AHSG;SOST
collagen-activated tyrosine kinase receptor signaling pathway (GO:0038063)	0.00257168	0.0887231	35.3018	COL1A1;COL4A6	COL1A1;COL4A6
SA node cell action potential (GO:0086015)	0.00257168	0.0887231	35.3018	CACNA1D;CACNA1G	CACNA1D;CACNA1G
skin morphogenesis (GO:0043589)	0.00257168	0.0887231	35.3018	COL1A1;COL1A2	COL1A1;COL1A2
regulation of myotube differentiation (GO:0010830)	0.00272543	0.0922533	12.0783	TMEM119;ATP11A;BHLHA15	TMEM119;ATP11A;BHLHA15
cellular protein metabolic process (GO:0044267)	0.00290895	0.0966418	2.68176	VCAN;UBA7;AHSG;MMP2;IGFBP2;SPP1;TNC;APOE;TIMP1;L2HGDH;CCN1;LGMN	VCAN;UBA7;AHSG;MMP2;IGFBP2;SPP1;TNC;APOE;TIMP1;L2HGDH;CCN1;LGMN
platelet degranulation (GO:0002576)	0.00299349	0.0970753	4.50458	AHSG;SERPINF2;F13A1;TIMP1;TUBA4A;VEGFA	AHSG;SERPINF2;F13A1;TIMP1;TUBA4A;VEGFA
regulation of monocyte chemotaxis (GO:0090025)	0.00305546	0.0970753	11.5525	GREM1;DUSP1;LGMN	GREM1;DUSP1;LGMN
striated muscle contraction (GO:0006941)	0.00322697	0.0970753	7.10775	TNNT1;TNNC2;TNNI2;MYH7	TNNT1;TNNC2;TNNI2;MYH7
unsaturated fatty acid metabolic process (GO:0033559)	0.00322697	0.0970753	7.10775	DAGLA;SCD;ALOX15;SCD5	DAGLA;SCD;ALOX15;SCD5
regulation of cysteine-type endopeptidase activity involved in apoptotic process (GO:0043281)	0.00338977	0.0970753	5.30328	ACVR1C;MYC;IFI6;DHCR24;VEGFA	ACVR1C;MYC;IFI6;DHCR24;VEGFA
immunological synapse formation (GO:0001771)	0.00340343	0.0970753	29.4167	CCL21;CORO1A	CCL21;CORO1A
negative regulation of long-term synaptic potentiation (GO:1900272)	0.00340343	0.0970753	29.4167	EPHA4;APOE	EPHA4;APOE
positive regulation of execution phase of apoptosis (GO:1900119)	0.00340343	0.0970753	29.4167	FAP;DLC1	FAP;DLC1
positive regulation of toll-like receptor signaling pathway (GO:0034123)	0.003409	0.0970753	11.0706	RSAD2;IFI35;LBP	RSAD2;IFI35;LBP
calcium ion import (GO:0070509)	0.00378656	0.106142	10.6273	CACNA1D;MCU;CACNA1G	CACNA1D;MCU;CACNA1G
positive regulation of developmental process (GO:0051094)	0.00406505	0.112195	3.68595	CDC20;ZBTB16;SERPINF2;TMEM119;APOE;MCU;VEGFA	CDC20;ZBTB16;SERPINF2;TMEM119;APOE;MCU;VEGFA
negative regulation of neuron projection development (GO:0010977)	0.00418013	0.113623	6.57991	EPHA4;SPOCK1;APOE;NGEF	EPHA4;SPOCK1;APOE;NGEF
endothelial cell chemotaxis (GO:0035767)	0.00434334	0.114588	25.213	NR4A1;VEGFA	NR4A1;VEGFA
skeletal muscle fiber development (GO:0048741)	0.00434334	0.114588	25.213	ACTA1;MYORG	ACTA1;MYORG
regulated exocytosis (GO:0045055)	0.00445438	0.115814	3.62148	AHSG;SERPINF2;F13A1;OTOF;TIMP1;TUBA4A;VEGFA	AHSG;SERPINF2;F13A1;OTOF;TIMP1;TUBA4A;VEGFA
regulation of long-term synaptic potentiation (GO:1900271)	0.00461564	0.118292	9.83906	EPHA4;APOE;LGMN	EPHA4;APOE;LGMN
phosphatidylethanolamine metabolic process (GO:0046337)	0.00506806	0.128058	9.48719	PHOSPHO1;ALOX15;LPIN1	PHOSPHO1;ALOX15;LPIN1
myelin assembly (GO:0032288)	0.0053889	0.132434	22.0603	CNTNAP1;TENM4	CNTNAP1;TENM4
positive regulation of toll-like receptor 4 signaling pathway (GO:0034145)	0.0053889	0.132434	22.0603	IFI35;LBP	IFI35;LBP
negative regulation of cell migration (GO:0030336)	0.00596483	0.143993	3.88063	EPHA4;COL3A1;ACVR1C;DLC1;TIMP1;FOXO3	EPHA4;COL3A1;ACVR1C;DLC1;TIMP1;FOXO3
negative regulation of Wnt signaling pathway (GO:0030178)	0.00612671	0.143993	3.40307	GREM1;RNF213;FRZB;IGFBP2;APOE;SOST;TPBGL	GREM1;RNF213;FRZB;IGFBP2;APOE;SOST;TPBGL
cellular response to type I interferon (GO:0071357)	0.00627467	0.143993	5.82277	RSAD2;IFI6;ISG15;IFI35	RSAD2;IFI6;ISG15;IFI35
type I interferon signaling pathway (GO:0060337)	0.00627467	0.143993	5.82277	RSAD2;IFI6;ISG15;IFI35	RSAD2;IFI6;ISG15;IFI35
cellular response to UV-A (GO:0071492)	0.00653762	0.143993	19.6081	MMP2;TIMP1	MMP2;TIMP1
central nervous system myelination (GO:0022010)	0.00653762	0.143993	19.6081	CNTNAP1;TENM4	CNTNAP1;TENM4
myotube cell development (GO:0014904)	0.00653762	0.143993	19.6081	ACTA1;MYORG	ACTA1;MYORG
negative regulation of bone remodeling (GO:0046851)	0.00653762	0.143993	19.6081	GREM1;TMEM119	GREM1;TMEM119
secondary alcohol biosynthetic process (GO:1902653)	0.00658162	0.143993	8.56777	ACLY;DHCR24;LSS	ACLY;DHCR24;LSS
protein processing (GO:0016485)	0.00709717	0.150684	4.40684	CPD;CPXM1;AEBP1;CPZ;LGMN	CPD;CPXM1;AEBP1;CPZ;LGMN
cholesterol biosynthetic process (GO:0006695)	0.00713945	0.150684	8.29961	ACLY;DHCR24;LSS	ACLY;DHCR24;LSS
embryonic skeletal system development (GO:0048706)	0.00713945	0.150684	8.29961	COL1A1;PDGFRA;SLC2A10	COL1A1;PDGFRA;SLC2A10
regulation of ossification (GO:0030278)	0.00772448	0.153516	8.0477	AHSG;ZBTB16;SOST	AHSG;ZBTB16;SOST
macrophage activation (GO:0042116)	0.00772448	0.153516	8.0477	PLCG2;IFI35;LBP	PLCG2;IFI35;LBP
positive regulation of bone mineralization (GO:0030501)	0.00772448	0.153516	8.0477	TMEM119;ISG15;CCN1	TMEM119;ISG15;CCN1
cell chemotaxis (GO:0060326)	0.00773734	0.153516	5.46334	PDGFRA;NR4A1;CCL21;VEGFA	PDGFRA;NR4A1;CCL21;VEGFA
sphingoid metabolic process (GO:0046519)	0.00778704	0.153516	17.6464	SPTLC3;PLPP3	SPTLC3;PLPP3
negative regulation of leukocyte chemotaxis (GO:0002689)	0.00778704	0.153516	17.6464	GREM1;DUSP1	GREM1;DUSP1
negative regulation of stress-activated MAPK cascade (GO:0032873)	0.008337	0.162572	7.8106	DUSP1;MYC;KLHL31	DUSP1;MYC;KLHL31
sterol biosynthetic process (GO:0016126)	0.00897729	0.165024	7.58706	ACLY;DHCR24;LSS	ACLY;DHCR24;LSS
regulation of inflammatory response (GO:0050727)	0.00911103	0.165024	3.14415	DAGLA;AHSG;ALOX15;NLRC3;IFI35;APOE;SMPDL3B	DAGLA;AHSG;ALOX15;NLRC3;IFI35;APOE;SMPDL3B
regulation of fibrinolysis (GO:0051917)	0.00913478	0.165024	16.0414	FAP;SERPINF2	FAP;SERPINF2
negative regulation of mononuclear cell migration (GO:0071676)	0.00913478	0.165024	16.0414	GREM1;DUSP1	GREM1;DUSP1
negative regulation of myotube differentiation (GO:0010832)	0.00913478	0.165024	16.0414	TMEM119;BHLHA15	TMEM119;BHLHA15
positive regulation of lipid transport (GO:0032370)	0.00913478	0.165024	16.0414	SPP1;APOE	SPP1;APOE
organonitrogen compound biosynthetic process (GO:1901566)	0.00923443	0.165024	3.52069	PHOSPHO1;SPTLC3;ELOVL6;APOE;PLPP3;LPIN1	PHOSPHO1;SPTLC3;ELOVL6;APOE;PLPP3;LPIN1
positive regulation of cell differentiation (GO:0045597)	0.00924822	0.165024	2.86591	COL1A1;CRB2;FRZB;ZBTB16;SERPINF2;TMEM119;TCF4;CCN1	COL1A1;CRB2;FRZB;ZBTB16;SERPINF2;TMEM119;TCF4;CCN1
endothelial cell migration (GO:0043542)	0.00964561	0.165024	7.37593	NR4A1;FAP;VEGFA	NR4A1;FAP;VEGFA
integrin-mediated signaling pathway (GO:0007229)	0.0103248	0.165024	5.00013	COL3A1;ITGA2;ISG15;PLPP3	COL3A1;ITGA2;ISG15;PLPP3
fatty acid derivative biosynthetic process (GO:1901570)	0.0103422	0.165024	7.17622	ACLY;SCD;SCD5	ACLY;SCD;SCD5
negative regulation of blood coagulation (GO:0030195)	0.0103422	0.165024	7.17622	PDGFRA;SERPINF2;APOE	PDGFRA;SERPINF2;APOE
2-oxoglutarate metabolic process (GO:0006103)	0.0105785	0.165024	14.7039	GPT2;L2HGDH	GPT2;L2HGDH
regulation of gastrulation (GO:0010470)	0.0105785	0.165024	14.7039	CRB2;TENM4	CRB2;TENM4
regulation of integrin-mediated signaling pathway (GO:2001044)	0.0105785	0.165024	14.7039	SLC2A10;TIMP1	SLC2A10;TIMP1
coenzyme A metabolic process (GO:0015936)	0.0105785	0.165024	14.7039	SLC25A16;ACLY	SLC25A16;ACLY
response to chemokine (GO:1990868)	0.0105785	0.165024	14.7039	CCL21;DUSP1	CCL21;DUSP1
response to UV-A (GO:0070141)	0.0105785	0.165024	14.7039	MMP2;TIMP1	MMP2;TIMP1
steroid catabolic process (GO:0006706)	0.0105785	0.165024	14.7039	SPP1;HSD17B14	SPP1;HSD17B14
negative regulation of bone mineralization (GO:0030502)	0.0105785	0.165024	14.7039	GREM1;AHSG	GREM1;AHSG
negative regulation of cell activation (GO:0050866)	0.0105785	0.165024	14.7039	PDGFRA;APOE	PDGFRA;APOE
peptidyl-serine dephosphorylation (GO:0070262)	0.0105785	0.165024	14.7039	PPP5C;DUSP1	PPP5C;DUSP1
positive regulation of glycoprotein biosynthetic process (GO:0010560)	0.0105785	0.165024	14.7039	CCL21;SLC2A10	CCL21;SLC2A10
regulation of BMP signaling pathway (GO:0030510)	0.0108041	0.167091	4.93043	GREM1;CRB2;SOST;CCN1	GREM1;CRB2;SOST;CCN1
positive regulation of biomineral tissue development (GO:0070169)	0.0110672	0.167529	6.98702	TMEM119;ISG15;CCN1	TMEM119;ISG15;CCN1
negative regulation of signal transduction (GO:0009968)	0.0112152	0.167529	2.76505	SLC2A10;AHSG;FRZB;SOST;SMPDL3B;DLL1;DLK1;LGMN	SLC2A10;AHSG;FRZB;SOST;SMPDL3B;DLL1;DLK1;LGMN
negative regulation of canonical Wnt signaling pathway (GO:0090090)	0.0112771	0.167529	3.36449	GREM1;FRZB;IGFBP2;APOE;SOST;TPBGL	GREM1;FRZB;IGFBP2;APOE;SOST;TPBGL
cholesterol metabolic process (GO:0008203)	0.0112975	0.167529	4.86264	ACLY;DHCR24;APOE;LSS	ACLY;DHCR24;APOE;LSS
negative regulation of cell population proliferation (GO:0008285)	0.0112993	0.167529	2.43463	GREM1;ACVR1C;FAP;FRZB;MYC;DLC1;ITGA1;NLRC3;IFI35;DLL1	GREM1;ACVR1C;FAP;FRZB;MYC;DLC1;ITGA1;NLRC3;IFI35;DLL1
calcium ion transmembrane import into cytosol (GO:0097553)	0.0118209	0.16981	6.80752	CCL21;PLCG2;TRPV2	CCL21;PLCG2;TRPV2
positive regulation of cellular process (GO:0048522)	0.0118874	0.16981	2.07116	EPHA4;PDGFRA;TENM4;AHSG;SERPINF2;DLL1;VEGFA;GREM1;ACLY;SAPCD2;MYC;TIMP1;LBP;LGMN	EPHA4;PDGFRA;TENM4;AHSG;SERPINF2;DLL1;VEGFA;GREM1;ACLY;SAPCD2;MYC;TIMP1;LBP;LGMN
acute-phase response (GO:0006953)	0.0121158	0.16981	13.5721	AHSG;LBP	AHSG;LBP
cardiac myofibril assembly (GO:0055003)	0.0121158	0.16981	13.5721	FHOD3;PDGFRA	FHOD3;PDGFRA
eye photoreceptor cell development (GO:0042462)	0.0121158	0.16981	13.5721	CRB2;VEGFA	CRB2;VEGFA
positive regulation of endothelial cell chemotaxis (GO:2001028)	0.0121158	0.16981	13.5721	VEGFA;LGMN	VEGFA;LGMN
positive regulation of sprouting angiogenesis (GO:1903672)	0.0121158	0.16981	13.5721	DLL1;VEGFA	DLL1;VEGFA
myofibril assembly (GO:0030239)	0.0126035	0.173644	6.637	FHOD3;PDGFRA;TNNT1	FHOD3;PDGFRA;TNNT1
negative regulation of type I interferon production (GO:0032480)	0.0126035	0.173644	6.637	UBA7;NLRC3;ISG15	UBA7;NLRC3;ISG15
lipid biosynthetic process (GO:0008610)	0.012864	0.173644	4.66999	ACLY;SCD;SCD5;LSS	ACLY;SCD;SCD5;LSS
positive regulation of cell adhesion (GO:0045785)	0.012864	0.173644	4.66999	EPHA4;CCL21;ALOX15;VEGFA	EPHA4;CCL21;ALOX15;VEGFA
positive regulation of MAPK cascade (GO:0043410)	0.0129467	0.173644	2.69132	PDGFRA;CCL8;CCL21;SERPINF2;ALOX15;PLCG2;APOE;VEGFA	PDGFRA;CCL8;CCL21;SERPINF2;ALOX15;PLCG2;APOE;VEGFA
nervous system development (GO:0007399)	0.013094	0.173644	2.26923	VCAN;DAGLA;ACVR1C;GSS;ZBTB16;SCD5;SPOCK1;CAPG;ECRG4;DCLK1;VEGFA	VCAN;DAGLA;ACVR1C;GSS;ZBTB16;SCD5;SPOCK1;CAPG;ECRG4;DCLK1;VEGFA
fatty acid metabolic process (GO:0006631)	0.0134111	0.173644	3.73683	ACLY;ALOX15;LPIN1;SLC27A2;ACSF2	ACLY;ALOX15;LPIN1;SLC27A2;ACSF2
response to amyloid-beta (GO:1904645)	0.013415	0.173644	6.47479	EPHA4;MMP2;LGMN	EPHA4;MMP2;LGMN
positive regulation of receptor-mediated endocytosis (GO:0048260)	0.013415	0.173644	6.47479	GREM1;CCL21;VEGFA	GREM1;CCL21;VEGFA
positive regulation of ERK1 and ERK2 cascade (GO:0070374)	0.0136203	0.173644	3.22147	PDGFRA;CCL8;CCL21;SERPINF2;ALOX15;APOE	PDGFRA;CCL8;CCL21;SERPINF2;ALOX15;APOE
regulation of ERBB signaling pathway (GO:1901184)	0.0137444	0.173644	12.602	IFI6;LGMN	IFI6;LGMN
eosinophil chemotaxis (GO:0048245)	0.0137444	0.173644	12.602	CCL8;CCL21	CCL8;CCL21
eosinophil migration (GO:0072677)	0.0137444	0.173644	12.602	CCL8;CCL21	CCL8;CCL21
negative regulation of platelet activation (GO:0010544)	0.0137444	0.173644	12.602	PDGFRA;APOE	PDGFRA;APOE
positive regulation of chemotaxis (GO:0050921)	0.0142557	0.178844	6.32031	CCL21;VEGFA;LGMN	CCL21;VEGFA;LGMN
long-chain fatty acid metabolic process (GO:0001676)	0.0145628	0.180177	4.49196	DAGLA;ALOX15;ELOVL6;SLC27A2	DAGLA;ALOX15;ELOVL6;SLC27A2
peptide metabolic process (GO:0006518)	0.0145628	0.180177	4.49196	CPD;CPXM1;AEBP1;CPZ	CPD;CPXM1;AEBP1;CPZ
positive regulation of transcription, DNA-templated (GO:0045893)	0.0150464	0.184595	1.72893	ZNF462;ZBTB16;SERPINF2;CKAP2;FOS;FOXO3;DLL1;JMJD6;VEGFA;COL1A1;GREM1;NR4A1;MYC;SPP1;TNNI2;TCF4;MYBL2;APOE;SOST;CCN1;LPIN1;JUNB	ZNF462;ZBTB16;SERPINF2;CKAP2;FOS;FOXO3;DLL1;JMJD6;VEGFA;COL1A1;GREM1;NR4A1;MYC;SPP1;TNNI2;TCF4;MYBL2;APOE;SOST;CCN1;LPIN1;JUNB
regulation of fibroblast proliferation (GO:0048145)	0.0151257	0.184595	6.17301	PDGFRA;MYC;NLRC3	PDGFRA;MYC;NLRC3
membrane depolarization during cardiac muscle cell action potential (GO:0086012)	0.0154622	0.187427	11.7613	CACNA1D;CACNA1G	CACNA1D;CACNA1G
proteolysis (GO:0006508)	0.0166708	0.19985	2.5642	FAP;MMP23B;CPD;MMP2;CPXM1;AEBP1;CPZ;LGMN	FAP;MMP23B;CPD;MMP2;CPXM1;AEBP1;CPZ;LGMN
regulation of interleukin-10 production (GO:0032653)	0.0169538	0.19985	5.89806	PLCG2;ISG15;DLL1	PLCG2;ISG15;DLL1
positive regulation of endocytosis (GO:0045807)	0.0169538	0.19985	5.89806	CCL21;APOE;DLL1	CCL21;APOE;DLL1
calcium ion transmembrane transport (GO:0070588)	0.0170393	0.19985	4.27461	TRPV2;CACNA1D;MCU;CACNA1G	TRPV2;CACNA1D;MCU;CACNA1G
carbohydrate derivative transport (GO:1901264)	0.0172669	0.19985	11.0257	LBP;SLC15A3	LBP;SLC15A3
negative regulation of fibroblast proliferation (GO:0048147)	0.0172669	0.19985	11.0257	MYC;NLRC3	MYC;NLRC3
positive chemotaxis (GO:0050918)	0.0172669	0.19985	11.0257	CORO1A;VEGFA	CORO1A;VEGFA
sensory perception of mechanical stimulus (GO:0050954)	0.017697	0.203515	4.22351	COL1A1;PIEZO2;CACNA1D;CRYM	COL1A1;PIEZO2;CACNA1D;CRYM
negative regulation of cell projection organization (GO:0031345)	0.0179122	0.204678	5.76955	EPHA4;SPOCK1;APOE	EPHA4;SPOCK1;APOE
transforming growth factor beta receptor signaling pathway (GO:0007179)	0.0183703	0.207026	4.17361	COL3A1;COL1A2;FOS;FMOD	COL3A1;COL1A2;FOS;FMOD
regulation of ERK1 and ERK2 cascade (GO:0070372)	0.0188336	0.207026	2.70416	PDGFRA;CCL8;CCL21;SERPINF2;ALOX15;APOE;CCN1	PDGFRA;CCL8;CCL21;SERPINF2;ALOX15;APOE;CCN1
actin polymerization or depolymerization (GO:0008154)	0.0189002	0.207026	5.6465	PREX1;DIAPH3;CAPG	PREX1;DIAPH3;CAPG
regulation of cell-cell adhesion mediated by cadherin (GO:2000047)	0.0191563	0.207026	10.3766	SERPINF2;VEGFA	SERPINF2;VEGFA
cardiac muscle cell contraction (GO:0086003)	0.0191563	0.207026	10.3766	CACNA1D;CACNA1G	CACNA1D;CACNA1G
regulation of insulin-like growth factor receptor signaling pathway (GO:0043567)	0.0191563	0.207026	10.3766	IGFBP2;MYORG	IGFBP2;MYORG
sphingosine metabolic process (GO:0006670)	0.0191563	0.207026	10.3766	SPTLC3;PLPP3	SPTLC3;PLPP3
negative regulation of striated muscle cell differentiation (GO:0051154)	0.0191563	0.207026	10.3766	TMEM119;BHLHA15	TMEM119;BHLHA15
positive regulation of neutrophil chemotaxis (GO:0090023)	0.0191563	0.207026	10.3766	CCL21;MCU	CCL21;MCU
positive regulation of cell population proliferation (GO:0008284)	0.0193649	0.208028	2.13392	GREM1;PDGFRA;SAPCD2;MYC;SERPINF2;TMEM119;TIMP1;CCN1;DLL1;LGMN;VEGFA	GREM1;PDGFRA;SAPCD2;MYC;SERPINF2;TMEM119;TIMP1;CCN1;DLL1;LGMN;VEGFA
regulation of cell cycle (GO:0051726)	0.0196658	0.210003	2.48293	NR4A1;FAP;DUSP1;MYC;DHCR24;MYBL2;JUNB;DLGAP5	NR4A1;FAP;DUSP1;MYC;DHCR24;MYBL2;JUNB;DLGAP5
positive regulation of fat cell differentiation (GO:0045600)	0.0199178	0.211435	5.52859	FNDC5;FRZB;ZBTB16	FNDC5;FRZB;ZBTB16
energy reserve metabolic process (GO:0006112)	0.0211283	0.220065	9.7996	MYC;PYGM	MYC;PYGM
eye morphogenesis (GO:0048592)	0.0211283	0.220065	9.7996	COL5A1;VEGFA	COL5A1;VEGFA
mesoderm formation (GO:0001707)	0.0211283	0.220065	9.7996	CRB2;ITGA2	CRB2;ITGA2
regulation of epithelial cell proliferation (GO:0050678)	0.0212215	0.220065	3.98522	NR4A1;MYC;NLRC3;VEGFA	NR4A1;MYC;NLRC3;VEGFA
negative regulation of cysteine-type endopeptidase activity (GO:2000117)	0.0220422	0.227263	5.30691	IFI6;DHCR24;VEGFA	IFI6;DHCR24;VEGFA
positive regulation of immune system process (GO:0002684)	0.0231808	0.237636	9.28336	RSAD2;VEGFA	RSAD2;VEGFA
cellular protein modification process (GO:0006464)	0.0237765	0.242358	1.71239	UBA7;DUSP1;AHSG;ZBTB16;PMM2;TNC;PPM1H;F13A1;ISG15;DCLK1;PPP5C;COL3A1;VCAN;ACVR1C;SPP1;APOE;TIMP1;CCN1;PTPN4	UBA7;DUSP1;AHSG;ZBTB16;PMM2;TNC;PPM1H;F13A1;ISG15;DCLK1;PPP5C;COL3A1;VCAN;ACVR1C;SPP1;APOE;TIMP1;CCN1;PTPN4
negative regulation of cysteine-type endopeptidase activity involved in apoptotic process (GO:0043154)	0.0242855	0.242831	5.10228	IFI6;DHCR24;VEGFA	IFI6;DHCR24;VEGFA
protein maturation (GO:0051604)	0.0243297	0.242831	3.81304	CPD;CPXM1;AEBP1;CPZ	CPD;CPXM1;AEBP1;CPZ
positive regulation of apoptotic process (GO:0043065)	0.0250593	0.242831	2.36612	TOP2A;PREX1;ACVR1C;FAP;FRZB;DLC1;FOXO3;NGEF	TOP2A;PREX1;ACVR1C;FAP;FRZB;DLC1;FOXO3;NGEF
regulation of canonical Wnt signaling pathway (GO:0060828)	0.0252666	0.242831	2.53733	COL1A1;GREM1;FRZB;IGFBP2;APOE;SOST;TPBGL	COL1A1;GREM1;FRZB;IGFBP2;APOE;SOST;TPBGL
regulation of execution phase of apoptosis (GO:1900117)	0.0253118	0.242831	8.81875	FAP;DLC1	FAP;DLC1
regulation of membrane protein ectodomain proteolysis (GO:0051043)	0.0253118	0.242831	8.81875	APOE;TIMP1	APOE;TIMP1
regulation of platelet activation (GO:0010543)	0.0253118	0.242831	8.81875	PDGFRA;APOE	PDGFRA;APOE
negative regulation of biomineral tissue development (GO:0070168)	0.0253118	0.242831	8.81875	GREM1;AHSG	GREM1;AHSG
peptidyl-threonine dephosphorylation (GO:0035970)	0.0253118	0.242831	8.81875	PPP5C;DUSP1	PPP5C;DUSP1
positive regulation of granulocyte chemotaxis (GO:0071624)	0.0253118	0.242831	8.81875	CCL21;MCU	CCL21;MCU
positive regulation of neutrophil migration (GO:1902624)	0.0253118	0.242831	8.81875	CCL21;MCU	CCL21;MCU
glycosaminoglycan catabolic process (GO:0006027)	0.0254517	0.242874	5.00575	VCAN;SDC1;FMOD	VCAN;SDC1;FMOD
dicarboxylic acid metabolic process (GO:0043648)	0.0266476	0.25294	4.91281	ACLY;GPT2;L2HGDH	ACLY;GPT2;L2HGDH
regulation of cell population proliferation (GO:0042127)	0.0273335	0.253177	1.80573	PDGFRA;TNFRSF9;ITGA1;IFI35;ECRG4;DLL1;VEGFA;GREM1;SAPCD2;FRZB;MYC;DLC1;TIMP1;JUNB;LGMN	PDGFRA;TNFRSF9;ITGA1;IFI35;ECRG4;DLL1;VEGFA;GREM1;SAPCD2;FRZB;MYC;DLC1;TIMP1;JUNB;LGMN
artery development (GO:0060840)	0.0275193	0.253177	8.39838	SLC2A10;VEGFA	SLC2A10;VEGFA
regulation of supramolecular fiber organization (GO:1902903)	0.0275193	0.253177	8.39838	AEBP1;APOE	AEBP1;APOE
regulation of toll-like receptor 4 signaling pathway (GO:0034143)	0.0275193	0.253177	8.39838	IFI35;LBP	IFI35;LBP
positive regulation of protein autophosphorylation (GO:0031954)	0.0275193	0.253177	8.39838	GREM1;VEGFA	GREM1;VEGFA
positive regulation of receptor internalization (GO:0002092)	0.0275193	0.253177	8.39838	GREM1;VEGFA	GREM1;VEGFA
membrane lipid biosynthetic process (GO:0046467)	0.0278731	0.25439	4.82324	SPTLC3;ELOVL6;PLPP3	SPTLC3;ELOVL6;PLPP3
response to cytokine (GO:0034097)	0.0279347	0.25439	3.06272	COL3A1;ISG15;TIMP1;AFF3;PTPN4	COL3A1;ISG15;TIMP1;AFF3;PTPN4
positive regulation of transcription by RNA polymerase II (GO:0045944)	0.0290838	0.262592	1.72384	ZNF462;SERPINF2;CKAP2;FOS;FOXO3;DLL1;JMJD6;VEGFA;GREM1;NR4A1;MYC;TCF4;MYBL2;CCN1;LPIN1;JUNB;DLGAP5	ZNF462;SERPINF2;CKAP2;FOS;FOXO3;DLL1;JMJD6;VEGFA;GREM1;NR4A1;MYC;TCF4;MYBL2;CCN1;LPIN1;JUNB;DLGAP5
response to reactive oxygen species (GO:0000302)	0.0291281	0.262592	4.73687	PDGFRA;FOS;APOE	PDGFRA;FOS;APOE
actin filament organization (GO:0007015)	0.0293473	0.263246	3.02075	FHOD3;ACTA1;CAPG;CORO1A;MCU	FHOD3;ACTA1;CAPG;CORO1A;MCU
apoptotic nuclear changes (GO:0030262)	0.0298012	0.263366	8.01623	TOP2A;ACVR1C	TOP2A;ACVR1C
wound healing, spreading of cells (GO:0044319)	0.0298012	0.263366	8.01623	COL5A1;CCN1	COL5A1;CCN1
negative regulation of NIK/NF-kappaB signaling (GO:1901223)	0.0298012	0.263366	8.01623	NLRC3;IFI35	NLRC3;IFI35
dephosphorylation (GO:0016311)	0.0300703	0.263577	3.00018	PPP5C;DUSP1;PPM1H;PLPP3;PTPN4	PPP5C;DUSP1;PPM1H;PLPP3;PTPN4
steroid metabolic process (GO:0008202)	0.0304006	0.263577	3.54486	HSD17B14;DHCR24;LSS;LGMN	HSD17B14;DHCR24;LSS;LGMN
cellular response to chemokine (GO:1990869)	0.0304127	0.263577	4.65353	CCL8;CCL21;DUSP1	CCL8;CCL21;DUSP1
Notch signaling pathway (GO:0007219)	0.0304127	0.263577	4.65353	MYC;DLL1;DLGAP5	MYC;DLL1;DLGAP5
positive regulation of nucleic acid-templated transcription (GO:1903508)	0.0312601	0.268966	1.97222	COL1A1;MYC;ZBTB16;SPP1;TNNI2;TCF4;APOE;FOS;SOST;FOXO3;JMJD6	COL1A1;MYC;ZBTB16;SPP1;TNNI2;TCF4;APOE;FOS;SOST;FOXO3;JMJD6
positive regulation of cellular metabolic process (GO:0031325)	0.0313344	0.268966	3.50959	GREM1;ACLY;APOE;VEGFA	GREM1;ACLY;APOE;VEGFA
pattern recognition receptor signaling pathway (GO:0002221)	0.0317267	0.269391	4.57306	PLCG2;LBP;LGMN	PLCG2;LBP;LGMN
regulation of neutrophil chemotaxis (GO:0090022)	0.0321556	0.269391	7.66731	CCL21;MCU	CCL21;MCU
regulation of proteolysis involved in cellular protein catabolic process (GO:1903050)	0.0321556	0.269391	7.66731	EPHA4;APOE	EPHA4;APOE
negative regulation of sequestering of calcium ion (GO:0051283)	0.0321556	0.269391	7.66731	CCL21;PLCG2	CCL21;PLCG2
positive regulation of lipid metabolic process (GO:0045834)	0.0321556	0.269391	7.66731	ZBTB20;APOE	ZBTB20;APOE
chromosome organization (GO:0051276)	0.0322849	0.269391	3.475	TOP2A;MYC;GEM;PADI1	TOP2A;MYC;GEM;PADI1
central nervous system development (GO:0007417)	0.033066	0.2734	2.38967	VCAN;ZBTB16;SPOCK1;CAPG;ECRG4;DLL1;DCLK1	VCAN;ZBTB16;SPOCK1;CAPG;ECRG4;DLL1;DCLK1
positive regulation of cysteine-type endopeptidase activity (GO:2001056)	0.0330701	0.2734	4.49533	ACVR1C;MYC;LGMN	ACVR1C;MYC;LGMN
regulation of chondrocyte differentiation (GO:0032330)	0.0345806	0.280713	7.34747	GREM1;ZBTB16	GREM1;ZBTB16
regulation of mitotic metaphase/anaphase transition (GO:0030071)	0.0345806	0.280713	7.34747	DUSP1;DLGAP5	DUSP1;DLGAP5
membrane depolarization during action potential (GO:0086010)	0.0345806	0.280713	7.34747	CACNA1D;CACNA1G	CACNA1D;CACNA1G
negative regulation of protein transport (GO:0051224)	0.0345806	0.280713	7.34747	RSAD2;APOE	RSAD2;APOE
diterpenoid metabolic process (GO:0016101)	0.0358445	0.283751	4.3475	SDC1;APOE;BCO1	SDC1;APOE;BCO1
acute inflammatory response (GO:0002526)	0.0370743	0.283751	7.05321	AHSG;LBP	AHSG;LBP
regulation of blood coagulation (GO:0030193)	0.0370743	0.283751	7.05321	FAP;APOE	FAP;APOE
cellular lipid catabolic process (GO:0044242)	0.0370743	0.283751	7.05321	LPIN1;SMPDL3B	LPIN1;SMPDL3B
release of sequestered calcium ion into cytosol (GO:0051209)	0.0370743	0.283751	7.05321	CCL21;PLCG2	CCL21;PLCG2
positive regulation of BMP signaling pathway (GO:0030513)	0.0370743	0.283751	7.05321	CRB2;CCN1	CRB2;CCN1
positive regulation of cellular component movement (GO:0051272)	0.0370743	0.283751	7.05321	CCL21;VEGFA	CCL21;VEGFA
positive regulation of striated muscle cell differentiation (GO:0051155)	0.0370743	0.283751	7.05321	GREM1;ATP11A	GREM1;ATP11A
cellular component disassembly (GO:0022411)	0.038735	0.283751	4.20905	MMP2;CAPG;TIMP1	MMP2;CAPG;TIMP1
extracellular matrix disassembly (GO:0022617)	0.038735	0.283751	4.20905	MMP2;CAPG;TIMP1	MMP2;CAPG;TIMP1
regulation of muscle contraction (GO:0006937)	0.0396349	0.283751	6.78159	TNNT1;TNNC2	TNNT1;TNNC2
regulation of neuron migration (GO:2001222)	0.0396349	0.283751	6.78159	NTNG1;COL3A1	NTNG1;COL3A1
sarcomere organization (GO:0045214)	0.0396349	0.283751	6.78159	FHOD3;TNNT1	FHOD3;TNNT1
positive regulation of fibroblast proliferation (GO:0048146)	0.0396349	0.283751	6.78159	PDGFRA;MYC	PDGFRA;MYC
positive regulation of phosphatidylinositol 3-kinase activity (GO:0043552)	0.0396349	0.283751	6.78159	PDGFRA;CCL21	PDGFRA;CCL21
response to lipid (GO:0033993)	0.0404942	0.283751	3.22097	SCD;SPP1;LBP;FOXO3	SCD;SPP1;LBP;FOXO3
positive regulation of cellular component organization (GO:0051130)	0.0404942	0.283751	3.22097	CDC20;APOE;DLL1;VEGFA	CDC20;APOE;DLL1;VEGFA
positive regulation of kinase activity (GO:0033674)	0.0404942	0.283751	3.22097	EPHA4;PDGFRA;CCL21;CCN1	EPHA4;PDGFRA;CCL21;CCN1
calcium ion transport (GO:0006816)	0.0415963	0.283751	3.19179	CCL8;TRPV2;CACNA1D;CACNA1G	CCL8;TRPV2;CACNA1D;CACNA1G
actin filament polymerization (GO:0030041)	0.0422606	0.283751	6.53009	PREX1;DIAPH3	PREX1;DIAPH3
post-translational protein modification (GO:0043687)	0.0428848	0.283751	2.11657	VCAN;AHSG;ZBTB16;SPP1;TNC;APOE;TIMP1;CCN1	VCAN;AHSG;ZBTB16;SPP1;TNC;APOE;TIMP1;CCN1
cellular response to calcium ion (GO:0071277)	0.0432862	0.283751	4.01712	ALOX15;PLCG2;LGMN	ALOX15;PLCG2;LGMN
cellular response to decreased oxygen levels (GO:0036294)	0.0432862	0.283751	4.01712	MYC;AK4;VEGFA	MYC;AK4;VEGFA
kidney development (GO:0001822)	0.0448602	0.283751	3.95696	ZBTB16;IFT27;VEGFA	ZBTB16;IFT27;VEGFA
wound healing (GO:0042060)	0.0448602	0.283751	3.95696	PDGFRA;COL3A1;ALOX15	PDGFRA;COL3A1;ALOX15
cardiac muscle cell action potential (GO:0086001)	0.0449495	0.283751	6.29656	CACNA1D;CACNA1G	CACNA1D;CACNA1G
long-chain fatty acid biosynthetic process (GO:0042759)	0.0449495	0.283751	6.29656	ALOX15;ELOVL6	ALOX15;ELOVL6
negative regulation of Notch signaling pathway (GO:0045746)	0.0449495	0.283751	6.29656	DLL1;DLK1	DLL1;DLK1
positive regulation of lipid kinase activity (GO:0090218)	0.0449495	0.283751	6.29656	PDGFRA;CCL21	PDGFRA;CCL21
negative regulation of response to external stimulus (GO:0032102)	0.0450038	0.283751	3.10732	EPHA4;NLRC3;APOE;SMPDL3B	EPHA4;NLRC3;APOE;SMPDL3B
purine nucleoside bisphosphate metabolic process (GO:0034032)	0.0476999	0.283751	6.07913	ACLY;ACSF2	ACLY;ACSF2
cardiac muscle cell action potential involved in contraction (GO:0086002)	0.0476999	0.283751	6.07913	CACNA1D;CACNA1G	CACNA1D;CACNA1G
regulation of developmental growth (GO:0048638)	0.0476999	0.283751	6.07913	APOE;DLL1	APOE;DLL1
ribonucleoside bisphosphate metabolic process (GO:0033875)	0.0476999	0.283751	6.07913	ACLY;ACSF2	ACLY;ACSF2
peptide cross-linking (GO:0018149)	0.0476999	0.283751	6.07913	COL3A1;F13A1	COL3A1;F13A1
apoptotic process (GO:0006915)	0.0477692	0.283751	2.36958	FAP;MYC;DLC1;ZBTB16;IFI6;DHCR24	FAP;MYC;DLC1;ZBTB16;IFI6;DHCR24
neuron differentiation (GO:0030182)	0.0478785	0.283751	2.62457	NGRN;TENM4;SPOCK1;BHLHA15;VEGFA	NGRN;TENM4;SPOCK1;BHLHA15;VEGFA
negative regulation of apoptotic process (GO:0043066)	0.0495649	0.283751	1.88099	GREM1;RNF213;KRT18;MYC;IFI6;DHCR24;APOE;DLL1;LGMN;VEGFA	GREM1;RNF213;KRT18;MYC;IFI6;DHCR24;APOE;DLL1;LGMN;VEGFA
regulation of hydrolase activity (GO:0051336)	0.0497502	0.283751	3.7868	EPHA4;ADAP1;NGEF	EPHA4;ADAP1;NGEF
regulation of Rho protein signal transduction (GO:0035023)	0.0497502	0.283751	3.7868	COL3A1;DLC1;APOE	COL3A1;DLC1;APOE
regulation of chemotaxis (GO:0050920)	0.0505102	0.283751	5.87619	PDGFRA;CCL21	PDGFRA;CCL21
regulation of dendritic spine morphogenesis (GO:0061001)	0.0505102	0.283751	5.87619	EPHA4;NGEF	EPHA4;NGEF
long-chain fatty acid transport (GO:0015909)	0.0505102	0.283751	5.87619	APOE;SLC27A2	APOE;SLC27A2
positive regulation of interleukin-10 production (GO:0032733)	0.0505102	0.283751	5.87619	PLCG2;ISG15	PLCG2;ISG15
proteolysis involved in cellular protein catabolic process (GO:0051603)	0.0514358	0.283751	3.73328	FAP;ISG15;LGMN	FAP;ISG15;LGMN
sphingolipid biosynthetic process (GO:0030148)	0.0514358	0.283751	3.73328	SPTLC3;ELOVL6;PLPP3	SPTLC3;ELOVL6;PLPP3
regulation of sprouting angiogenesis (GO:1903670)	0.0533786	0.283751	5.68635	DLL1;VEGFA	DLL1;VEGFA
very long-chain fatty acid metabolic process (GO:0000038)	0.0533786	0.283751	5.68635	ELOVL6;SLC27A2	ELOVL6;SLC27A2
muscle cell development (GO:0055001)	0.0533786	0.283751	5.68635	SDC1;VEGFA	SDC1;VEGFA
phosphatidylcholine biosynthetic process (GO:0006656)	0.0533786	0.283751	5.68635	PHOSPHO1;LPIN1	PHOSPHO1;LPIN1
regulation of epithelial to mesenchymal transition (GO:0010717)	0.0548889	0.283751	3.63063	GREM1;CRB2;COL1A1	GREM1;CRB2;COL1A1
alpha-beta T cell differentiation (GO:0046632)	0.0552426	0.283751	21.9667	RSAD2	RSAD2
AMP biosynthetic process (GO:0006167)	0.0552426	0.283751	21.9667	APRT	APRT
apoptotic chromosome condensation (GO:0030263)	0.0552426	0.283751	21.9667	TOP2A	TOP2A
regulation of adherens junction organization (GO:1903391)	0.0552426	0.283751	21.9667	VEGFA	VEGFA
cannabinoid signaling pathway (GO:0038171)	0.0552426	0.283751	21.9667	DAGLA	DAGLA
regulation of cellular response to vascular endothelial growth factor stimulus (GO:1902547)	0.0552426	0.283751	21.9667	DLL1	DLL1
CD4-positive, alpha-beta T cell activation (GO:0035710)	0.0552426	0.283751	21.9667	RSAD2	RSAD2
cell migration involved in gastrulation (GO:0042074)	0.0552426	0.283751	21.9667	CRB2	CRB2
cell-cell adhesion mediated by integrin (GO:0033631)	0.0552426	0.283751	21.9667	PLPP3	PLPP3
regulation of dendritic cell cytokine production (GO:0002730)	0.0552426	0.283751	21.9667	PLCG2	PLCG2
cellular response to testosterone stimulus (GO:0071394)	0.0552426	0.283751	21.9667	SPP1	SPP1
cellular response to vitamin (GO:0071295)	0.0552426	0.283751	21.9667	POSTN	POSTN
regulation of low-density lipoprotein particle receptor catabolic process (GO:0032803)	0.0552426	0.283751	21.9667	APOE	APOE
coronary artery morphogenesis (GO:0060982)	0.0552426	0.283751	21.9667	VEGFA	VEGFA
determination of dorsal/ventral asymmetry (GO:0048262)	0.0552426	0.283751	21.9667	GREM1	GREM1
DNA catabolic process, exonucleolytic (GO:0000738)	0.0552426	0.283751	21.9667	TREX1	TREX1
regulation of respiratory burst involved in inflammatory response (GO:0060264)	0.0552426	0.283751	21.9667	LBP	LBP
regulation of retinal ganglion cell axon guidance (GO:0090259)	0.0552426	0.283751	21.9667	VEGFA	VEGFA
establishment of T cell polarity (GO:0001768)	0.0552426	0.283751	21.9667	CCL21	CCL21
exocyst localization (GO:0051601)	0.0552426	0.283751	21.9667	EXOC3L1	EXOC3L1
glucose import across plasma membrane (GO:0098708)	0.0552426	0.283751	21.9667	SLC2A10	SLC2A10
histone citrullination (GO:0036414)	0.0552426	0.283751	21.9667	PADI1	PADI1
response to prostaglandin (GO:0034694)	0.0552426	0.283751	21.9667	CCL21	CCL21
retina vasculature development in camera-type eye (GO:0061298)	0.0552426	0.283751	21.9667	PDGFRA	PDGFRA
SA node cell to atrial cardiac muscle cell signaling (GO:0086018)	0.0552426	0.283751	21.9667	CACNA1G	CACNA1G
sensory perception of sour taste (GO:0050915)	0.0552426	0.283751	21.9667	ASIC3	ASIC3
serotonin transport (GO:0006837)	0.0552426	0.283751	21.9667	SLC22A3	SLC22A3
serotonin uptake (GO:0051610)	0.0552426	0.283751	21.9667	SLC22A3	SLC22A3
membrane depolarization during AV node cell action potential (GO:0086045)	0.0552426	0.283751	21.9667	CACNA1G	CACNA1G
Toll signaling pathway (GO:0008063)	0.0552426	0.283751	21.9667	PELI3	PELI3
vascular endothelial growth factor receptor-2 signaling pathway (GO:0036324)	0.0552426	0.283751	21.9667	VEGFA	VEGFA
negative regulation of adaptive immune response (GO:0002820)	0.0552426	0.283751	21.9667	ALOX15	ALOX15
negative regulation of anion transmembrane transport (GO:1903960)	0.0552426	0.283751	21.9667	SLC43A2	SLC43A2
negative regulation of cholesterol biosynthetic process (GO:0045541)	0.0552426	0.283751	21.9667	APOE	APOE
negative regulation of cholesterol metabolic process (GO:0090206)	0.0552426	0.283751	21.9667	APOE	APOE
negative regulation of interferon-alpha production (GO:0032687)	0.0552426	0.283751	21.9667	NLRC3	NLRC3
negative regulation of leukocyte adhesion to vascular endothelial cell (GO:1904995)	0.0552426	0.283751	21.9667	CCL21	CCL21
negative regulation of metallopeptidase activity (GO:1905049)	0.0552426	0.283751	21.9667	TIMP1	TIMP1
negative regulation of plasminogen activation (GO:0010757)	0.0552426	0.283751	21.9667	SERPINF2	SERPINF2
negative regulation of sterol biosynthetic process (GO:0106119)	0.0552426	0.283751	21.9667	APOE	APOE
oxaloacetate metabolic process (GO:0006107)	0.0552426	0.283751	21.9667	ACLY	ACLY
oxidative RNA demethylation (GO:0035513)	0.0552426	0.283751	21.9667	JMJD6	JMJD6
positive regulation of axon extension involved in axon guidance (GO:0048842)	0.0552426	0.283751	21.9667	VEGFA	VEGFA
positive regulation of endothelial cell chemotaxis by VEGF-activated vascular endothelial growth factor receptor signaling pathway (GO:0038033)	0.0552426	0.283751	21.9667	VEGFA	VEGFA
positive regulation of glycoprotein metabolic process (GO:1903020)	0.0552426	0.283751	21.9667	CCL21	CCL21
positive regulation of leukocyte mediated immunity (GO:0002705)	0.0552426	0.283751	21.9667	PLCG2	PLCG2
positive regulation of mast cell chemotaxis (GO:0060754)	0.0552426	0.283751	21.9667	VEGFA	VEGFA
positive regulation of nucleotide-binding oligomerization domain containing signaling pathway (GO:0070426)	0.0552426	0.283751	21.9667	SLC15A3	SLC15A3
positive regulation of toll-like receptor 9 signaling pathway (GO:0034165)	0.0552426	0.283751	21.9667	RSAD2	RSAD2
positive regulation of transcription from RNA polymerase II promoter in response to hypoxia (GO:0061419)	0.0552426	0.283751	21.9667	VEGFA	VEGFA
positive regulation of transcription from RNA polymerase II promoter involved in heart development (GO:1901228)	0.0552426	0.283751	21.9667	GREM1	GREM1
protein citrullination (GO:0018101)	0.0552426	0.283751	21.9667	PADI1	PADI1
protein localization to axon (GO:0099612)	0.0552426	0.283751	21.9667	CNTNAP1	CNTNAP1
negative regulation of cytokine production (GO:0001818)	0.0560076	0.283751	2.50492	UBA7;SLC2A10;ISG15;NLRC3;DLL1	UBA7;SLC2A10;ISG15;NLRC3;DLL1
innate immune response (GO:0045087)	0.0562839	0.283751	2.11056	PLCG2;IFI6;ISG15;MASP1;LBP;PGLYRP1;CORO1A	PLCG2;IFI6;ISG15;MASP1;LBP;PGLYRP1;CORO1A
regulation of amyloid-beta formation (GO:1902003)	0.0563034	0.283751	5.50837	EPHA4;APOE	EPHA4;APOE
cardiac muscle contraction (GO:0060048)	0.0563034	0.283751	5.50837	TNNI2;MYH7	TNNI2;MYH7
cell-substrate junction assembly (GO:0007044)	0.0563034	0.283751	5.50837	DLC1;KRT5	DLC1;KRT5
cellular response to vascular endothelial growth factor stimulus (GO:0035924)	0.0563034	0.283751	5.50837	NR4A1;VEGFA	NR4A1;VEGFA
sister chromatid segregation (GO:0000819)	0.0563034	0.283751	5.50837	TOP2A;KIFC1	TOP2A;KIFC1
positive regulation of pri-miRNA transcription by RNA polymerase II (GO:1902895)	0.0563034	0.283751	5.50837	FOS;FOXO3	FOS;FOXO3
positive regulation of protein dephosphorylation (GO:0035307)	0.0563034	0.283751	5.50837	DLC1;ITGA1	DLC1;ITGA1
positive regulation of telomerase activity (GO:0051973)	0.0563034	0.283751	5.50837	GREM1;MYC	GREM1;MYC
purine ribonucleotide metabolic process (GO:0009150)	0.0566561	0.283751	3.58138	ACLY;AK4;ACSF2	ACLY;AK4;ACSF2
cellular response to UV (GO:0034644)	0.0566561	0.283751	3.58138	MYC;MMP2;TIMP1	MYC;MMP2;TIMP1
cellular response to amyloid-beta (GO:1904646)	0.059283	0.283751	5.34118	EPHA4;LGMN	EPHA4;LGMN
regulation of lipid biosynthetic process (GO:0046890)	0.059283	0.283751	5.34118	ZBTB20;APOE	ZBTB20;APOE
regulation of phosphatidylinositol 3-kinase activity (GO:0043551)	0.059283	0.283751	5.34118	PDGFRA;CCL21	PDGFRA;CCL21
positive regulation of lipid biosynthetic process (GO:0046889)	0.059283	0.283751	5.34118	ZBTB20;APOE	ZBTB20;APOE
regulation of primary metabolic process (GO:0080090)	0.0601457	0.283751	2.80967	SCD;ELOVL6;APOE;LSS	SCD;ELOVL6;APOE;LSS
cellular response to metal ion (GO:0071248)	0.0615157	0.283751	2.7874	ALOX15;PLCG2;FOS;LGMN	ALOX15;PLCG2;FOS;LGMN
negative regulation of cellular component organization (GO:0051129)	0.0621178	0.283751	3.44133	FAP;SOST;VEGFA	FAP;SOST;VEGFA
endoderm formation (GO:0001706)	0.0623159	0.283751	5.18382	DUSP1;MMP2	DUSP1;MMP2
regulation of receptor internalization (GO:0002090)	0.0623159	0.283751	5.18382	GREM1;VEGFA	GREM1;VEGFA
positive regulation of innate immune response (GO:0045089)	0.0623159	0.283751	5.18382	IFI35;LBP	IFI35;LBP
regulation of GTPase activity (GO:0043087)	0.0637346	0.283751	2.40876	EPHA4;CCL8;CCL21;ADAP1;NGEF	EPHA4;CCL8;CCL21;ADAP1;NGEF
regulation of cell adhesion (GO:0030155)	0.0643049	0.283751	2.74391	EPHA4;DUSP1;DLL1;VEGFA	EPHA4;DUSP1;DLL1;VEGFA
transmembrane receptor protein serine/threonine kinase signaling pathway (GO:0007178)	0.0643049	0.283751	2.74391	COL3A1;COL1A2;ACVR1C;FOS	COL3A1;COL1A2;ACVR1C;FOS
regulation of p38MAPK cascade (GO:1900744)	0.0654004	0.283751	5.03546	DUSP1;VEGFA	DUSP1;VEGFA
skeletal muscle tissue development (GO:0007519)	0.0654004	0.283751	5.03546	ACTA1;MYORG	ACTA1;MYORG
positive regulation of peptidyl-tyrosine phosphorylation (GO:0050731)	0.0657241	0.283751	2.72266	GREM1;EPHA4;PLCG2;VEGFA	GREM1;EPHA4;PLCG2;VEGFA
ephrin receptor signaling pathway (GO:0048013)	0.0658901	0.283751	3.35386	EPHA4;MMP2;NGEF	EPHA4;MMP2;NGEF
astrocyte development (GO:0014002)	0.065921	0.283751	17.5724	DLL1	DLL1
regulation of collagen fibril organization (GO:1904026)	0.065921	0.283751	17.5724	AEBP1	AEBP1
regulation of extracellular exosome assembly (GO:1903551)	0.065921	0.283751	17.5724	SDC1	SDC1
cellular response to lipoteichoic acid (GO:0071223)	0.065921	0.283751	17.5724	LBP	LBP
contact inhibition (GO:0060242)	0.065921	0.283751	17.5724	FAP	FAP
regulation of mast cell chemotaxis (GO:0060753)	0.065921	0.283751	17.5724	VEGFA	VEGFA
dehydroascorbic acid transport (GO:0070837)	0.065921	0.283751	17.5724	SLC2A10	SLC2A10
regulation of mitotic sister chromatid segregation (GO:0033047)	0.065921	0.283751	17.5724	DUSP1	DUSP1
regulation of mitotic spindle checkpoint (GO:1903504)	0.065921	0.283751	17.5724	DUSP1	DUSP1
regulation of nitric oxide mediated signal transduction (GO:0010749)	0.065921	0.283751	17.5724	VEGFA	VEGFA
regulation of nucleotide-binding oligomerization domain containing 2 signaling pathway (GO:0070432)	0.065921	0.283751	17.5724	SLC15A3	SLC15A3
embryonic hindlimb morphogenesis (GO:0035116)	0.065921	0.283751	17.5724	AFF3	AFF3
embryonic skeletal joint development (GO:0072498)	0.065921	0.283751	17.5724	SLC2A10	SLC2A10
establishment of lymphocyte polarity (GO:0001767)	0.065921	0.283751	17.5724	CCL21	CCL21
gamma-aminobutyric acid transport (GO:0015812)	0.065921	0.283751	17.5724	SLC6A12	SLC6A12
gastrulation with mouth forming second (GO:0001702)	0.065921	0.283751	17.5724	CRB2	CRB2
GDP-mannose metabolic process (GO:0019673)	0.065921	0.283751	17.5724	PMM2	PMM2
regulation of type B pancreatic cell proliferation (GO:0061469)	0.065921	0.283751	17.5724	NR4A1	NR4A1
hexose import across plasma membrane (GO:0140271)	0.065921	0.283751	17.5724	SLC2A10	SLC2A10
histamine metabolic process (GO:0001692)	0.065921	0.283751	17.5724	SLC22A3	SLC22A3
response to lipoteichoic acid (GO:0070391)	0.065921	0.283751	17.5724	LBP	LBP
response to testosterone (GO:0033574)	0.065921	0.283751	17.5724	SPP1	SPP1
retinal cone cell development (GO:0046549)	0.065921	0.283751	17.5724	CRB2	CRB2
retinal cone cell differentiation (GO:0042670)	0.065921	0.283751	17.5724	CRB2	CRB2
skeletal muscle thin filament assembly (GO:0030240)	0.065921	0.283751	17.5724	ACTA1	ACTA1
macromolecule biosynthetic process (GO:0009059)	0.065921	0.283751	17.5724	COL5A1	COL5A1
venous blood vessel morphogenesis (GO:0048845)	0.065921	0.283751	17.5724	VEGFA	VEGFA
negative regulation of amino acid transport (GO:0051956)	0.065921	0.283751	17.5724	SLC43A2	SLC43A2
negative regulation of cellular extravasation (GO:0002692)	0.065921	0.283751	17.5724	CCL21	CCL21
negative regulation of meiotic cell cycle (GO:0051447)	0.065921	0.283751	17.5724	DUSP1	DUSP1
negative regulation of neuron migration (GO:2001223)	0.065921	0.283751	17.5724	COL3A1	COL3A1
negative regulation of SMAD protein signal transduction (GO:0060392)	0.065921	0.283751	17.5724	SLC2A10	SLC2A10
neurotransmitter receptor transport, endosome to postsynaptic membrane (GO:0098887)	0.065921	0.283751	17.5724	GRIP2	GRIP2
neurotransmitter-gated ion channel clustering (GO:0072578)	0.065921	0.283751	17.5724	APOE	APOE
norepinephrine transport (GO:0015874)	0.065921	0.283751	17.5724	SLC22A3	SLC22A3
nucleotide transport (GO:0006862)	0.065921	0.283751	17.5724	SLC25A36	SLC25A36
positive regulation of antigen processing and presentation (GO:0002579)	0.065921	0.283751	17.5724	CCL21	CCL21
positive regulation of deacetylase activity (GO:0090045)	0.065921	0.283751	17.5724	VEGFA	VEGFA
positive regulation of dendritic cell antigen processing and presentation (GO:0002606)	0.065921	0.283751	17.5724	CCL21	CCL21
positive regulation of I-kappaB phosphorylation (GO:1903721)	0.065921	0.283751	17.5724	PLCG2	PLCG2
positive regulation of kidney development (GO:0090184)	0.065921	0.283751	17.5724	MYC	MYC
positive regulation of toll-like receptor 7 signaling pathway (GO:0034157)	0.065921	0.283751	17.5724	RSAD2	RSAD2
regulation of defense response (GO:0031347)	0.0678149	0.283751	3.31177	AHSG;ALOX15;APOE	AHSG;ALOX15;APOE
regulation of osteoblast differentiation (GO:0045667)	0.0678149	0.283751	3.31177	GREM1;TMEM119;CCN1	GREM1;TMEM119;CCN1
positive regulation of phosphorylation (GO:0042327)	0.068014	0.283751	2.15609	EPHA4;PDGFRA;TMEM119;ZBTB20;CCN1;VEGFA	EPHA4;PDGFRA;TMEM119;ZBTB20;CCN1;VEGFA
negative regulation of innate immune response (GO:0045824)	0.068535	0.283751	4.89534	NLRC3;ISG15	NLRC3;ISG15
cellular response to tumor necrosis factor (GO:0071356)	0.0696033	0.283751	2.34444	CCL8;TNFRSF13B;CCL21;TNFRSF9;FOXO3	CCL8;TNFRSF13B;CCL21;TNFRSF9;FOXO3
vascular transport (GO:0010232)	0.0697651	0.283751	3.27072	SLC22A3;SLC2A10;SLC16A12	SLC22A3;SLC2A10;SLC16A12
regulation of heart rate by cardiac conduction (GO:0086091)	0.0717182	0.283751	4.76279	CACNA1D;CACNA1G	CACNA1D;CACNA1G
negative regulation of protein secretion (GO:0050709)	0.0717182	0.283751	4.76279	RSAD2;APOE	RSAD2;APOE
negative regulation of secretion by cell (GO:1903531)	0.0717182	0.283751	4.76279	RSAD2;APOE	RSAD2;APOE
negative regulation of defense response (GO:0031348)	0.0717405	0.283751	3.23067	NLRC3;APOE;SMPDL3B	NLRC3;APOE;SMPDL3B
protein dephosphorylation (GO:0006470)	0.0730627	0.283751	2.62115	PPP5C;DUSP1;PPM1H;PTPN4	PPP5C;DUSP1;PPM1H;PTPN4
transport across blood-brain barrier (GO:0150104)	0.0737409	0.283751	3.19158	SLC22A3;SLC2A10;SLC16A12	SLC22A3;SLC2A10;SLC16A12
positive regulation of endothelial cell migration (GO:0010595)	0.0737409	0.283751	3.19158	PLPP3;VEGFA;LGMN	PLPP3;VEGFA;LGMN
regulation of signal transduction (GO:0009966)	0.0745065	0.283751	2.29538	IGFBP2;ALOX15;VWA2;TIMP1;DLL1	IGFBP2;ALOX15;VWA2;TIMP1;DLL1
lymphocyte migration (GO:0072676)	0.0749485	0.283751	4.63722	CCL8;CCL21	CCL8;CCL21
sulfur compound catabolic process (GO:0044273)	0.0749485	0.283751	4.63722	VCAN;FMOD	VCAN;FMOD
negative regulation of ERBB signaling pathway (GO:1901185)	0.0749485	0.283751	4.63722	ITGA1;LGMN	ITGA1;LGMN
astrocyte differentiation (GO:0048708)	0.0764792	0.283751	14.643	DLL1	DLL1
regulation of atrial cardiac muscle cell membrane repolarization (GO:0060372)	0.0764792	0.283751	14.643	CACNA1D	CACNA1D
AV node cell action potential (GO:0086016)	0.0764792	0.283751	14.643	CACNA1G	CACNA1G
AV node cell to bundle of His cell communication (GO:0086067)	0.0764792	0.283751	14.643	CACNA1G	CACNA1G
axon ensheathment in central nervous system (GO:0032291)	0.0764792	0.283751	14.643	CNTNAP1	CNTNAP1
regulation of blood-brain barrier permeability (GO:1905603)	0.0764792	0.283751	14.643	VEGFA	VEGFA
regulation of bone remodeling (GO:0046850)	0.0764792	0.283751	14.643	GREM1	GREM1
bleb assembly (GO:0032060)	0.0764792	0.283751	14.643	EMP3	EMP3
catecholamine uptake (GO:0090493)	0.0764792	0.283751	14.643	SLC22A3	SLC22A3
regulation of glial cell apoptotic process (GO:0034350)	0.0764792	0.283751	14.643	DLL1	DLL1
regulation of glial cell differentiation (GO:0045685)	0.0764792	0.283751	14.643	EPHA4	EPHA4
regulation of histone deacetylase activity (GO:1901725)	0.0764792	0.283751	14.643	VEGFA	VEGFA
regulation of I-kappaB phosphorylation (GO:1903719)	0.0764792	0.283751	14.643	PLCG2	PLCG2
chemical homeostasis within a tissue (GO:0048875)	0.0764792	0.283751	14.643	VEGFA	VEGFA
chylomicron remnant clearance (GO:0034382)	0.0764792	0.283751	14.643	APOE	APOE
regulation of mesenchymal stem cell differentiation (GO:2000739)	0.0764792	0.283751	14.643	PDGFRA	PDGFRA
regulation of metallopeptidase activity (GO:1905048)	0.0764792	0.283751	14.643	TIMP1	TIMP1
detection of molecule of bacterial origin (GO:0032490)	0.0764792	0.283751	14.643	LBP	LBP
DNA ligation (GO:0006266)	0.0764792	0.283751	14.643	TOP2A	TOP2A
dopamine transport (GO:0015872)	0.0764792	0.283751	14.643	SLC22A3	SLC22A3
fatty acid elongation, monounsaturated fatty acid (GO:0034625)	0.0764792	0.283751	14.643	ELOVL6	ELOVL6
fatty acid elongation, polyunsaturated fatty acid (GO:0034626)	0.0764792	0.283751	14.643	ELOVL6	ELOVL6
fatty acid elongation, saturated fatty acid (GO:0019367)	0.0764792	0.283751	14.643	ELOVL6	ELOVL6
fatty acid elongation, unsaturated fatty acid (GO:0019368)	0.0764792	0.283751	14.643	ELOVL6	ELOVL6
regulation of systemic arterial blood pressure by renin-angiotensin (GO:0003081)	0.0764792	0.283751	14.643	SERPINF2	SERPINF2
regulation of toll-like receptor 7 signaling pathway (GO:0034155)	0.0764792	0.283751	14.643	RSAD2	RSAD2
regulation of transcription from RNA polymerase II promoter involved in myocardial precursor cell differentiation (GO:0003256)	0.0764792	0.283751	14.643	GREM1	GREM1
glandular epithelial cell development (GO:0002068)	0.0764792	0.283751	14.643	DLL1	DLL1
hindlimb morphogenesis (GO:0035137)	0.0764792	0.283751	14.643	AFF3	AFF3
response to lead ion (GO:0010288)	0.0764792	0.283751	14.643	PPP5C	PPP5C
sinoatrial node development (GO:0003163)	0.0764792	0.283751	14.643	CACNA1G	CACNA1G
lipoxin biosynthetic process (GO:2001301)	0.0764792	0.283751	14.643	ALOX15	ALOX15
surfactant homeostasis (GO:0043129)	0.0764792	0.283751	14.643	VEGFA	VEGFA
marginal zone B cell differentiation (GO:0002315)	0.0764792	0.283751	14.643	DLL1	DLL1
thyroid hormone transport (GO:0070327)	0.0764792	0.283751	14.643	CRYM	CRYM
type B pancreatic cell development (GO:0003323)	0.0764792	0.283751	14.643	DLL1	DLL1
vascular associated smooth muscle cell development (GO:0097084)	0.0764792	0.283751	14.643	VEGFA	VEGFA
vascular wound healing (GO:0061042)	0.0764792	0.283751	14.643	VEGFA	VEGFA
very long-chain fatty acid catabolic process (GO:0042760)	0.0764792	0.283751	14.643	SLC27A2	SLC27A2
modulation by symbiont of host apoptotic process (GO:0052150)	0.0764792	0.283751	14.643	RNF213	RNF213
vitamin A metabolic process (GO:0006776)	0.0764792	0.283751	14.643	BCO1	BCO1
negative regulation by host of viral genome replication (GO:0044828)	0.0764792	0.283751	14.643	CCL8	CCL8
negative regulation of axon regeneration (GO:0048681)	0.0764792	0.283751	14.643	EPHA4	EPHA4
negative regulation of dendritic cell apoptotic process (GO:2000669)	0.0764792	0.283751	14.643	CCL21	CCL21
negative regulation of dendritic spine development (GO:0061000)	0.0764792	0.283751	14.643	NGEF	NGEF
negative regulation of epidermal cell differentiation (GO:0045605)	0.0764792	0.283751	14.643	DLL1	DLL1
negative regulation of membrane protein ectodomain proteolysis (GO:0051045)	0.0764792	0.283751	14.643	TIMP1	TIMP1
negative regulation of NLRP3 inflammasome complex assembly (GO:1900226)	0.0764792	0.283751	14.643	NLRC3	NLRC3
negative regulation of p38MAPK cascade (GO:1903753)	0.0764792	0.283751	14.643	DUSP1	DUSP1
negative regulation of stress-activated protein kinase signaling cascade (GO:0070303)	0.0764792	0.283751	14.643	MYC	MYC
neurotransmitter receptor transport, endosome to plasma membrane (GO:0099639)	0.0764792	0.283751	14.643	GRIP2	GRIP2
nodal signaling pathway (GO:0038092)	0.0764792	0.283751	14.643	ACVR1C	ACVR1C
oxygen transport (GO:0015671)	0.0764792	0.283751	14.643	MYC	MYC
positive regulation of adenylate cyclase activity (GO:0045762)	0.0764792	0.283751	14.643	CACNA1D	CACNA1D
positive regulation of amyloid-beta clearance (GO:1900223)	0.0764792	0.283751	14.643	APOE	APOE
positive regulation of aspartic-type endopeptidase activity involved in amyloid precursor protein catabolic process (GO:1902961)	0.0764792	0.283751	14.643	EPHA4	EPHA4
positive regulation of cardiac muscle cell differentiation (GO:2000727)	0.0764792	0.283751	14.643	GREM1	GREM1
positive regulation of gastrulation (GO:2000543)	0.0764792	0.283751	14.643	TENM4	TENM4
positive regulation of interleukin-23 production (GO:0032747)	0.0764792	0.283751	14.643	PLCG2	PLCG2
positive regulation of podosome assembly (GO:0071803)	0.0764792	0.283751	14.643	CAPG	CAPG
positive regulation of receptor catabolic process (GO:2000646)	0.0764792	0.283751	14.643	APOE	APOE
positive regulation of respiratory burst (GO:0060267)	0.0764792	0.283751	14.643	LBP	LBP
positive regulation of synaptic plasticity (GO:0031915)	0.0764792	0.283751	14.643	CDC20	CDC20
positive regulation of trophoblast cell migration (GO:1901165)	0.0764792	0.283751	14.643	VEGFA	VEGFA
proline metabolic process (GO:0006560)	0.0764792	0.283751	14.643	ALDH4A1	ALDH4A1
heart contraction (GO:0060047)	0.0782245	0.283751	4.51809	TNNI2;MYH7	TNNI2;MYH7
response to growth factor (GO:0070848)	0.0782245	0.283751	4.51809	ACVR1C;MYC	ACVR1C;MYC
nitrogen compound transport (GO:0071705)	0.0792211	0.283751	2.54521	SLC22A3;SLC43A2;SLC6A12;SLC15A3	SLC22A3;SLC43A2;SLC6A12;SLC15A3
regulation of type I interferon production (GO:0032479)	0.0798891	0.283751	3.07978	UBA7;TREX1;ISG15	UBA7;TREX1;ISG15
second-messenger-mediated signaling (GO:0019932)	0.0798891	0.283751	3.07978	PLCG2;APOE;MCU	PLCG2;APOE;MCU
regulation of nervous system development (GO:0051960)	0.0815447	0.283751	4.40491	TENM4;DLL1	TENM4;DLL1
heterophilic cell-cell adhesion via plasma membrane cell adhesion molecules (GO:0007157)	0.0815447	0.283751	4.40491	CRB2;TENM4	CRB2;TENM4
monocyte chemotaxis (GO:0002548)	0.0815447	0.283751	4.40491	CCL8;CCL21	CCL8;CCL21
positive regulation of epithelial to mesenchymal transition (GO:0010718)	0.0815447	0.283751	4.40491	CRB2;COL1A1	CRB2;COL1A1
protein complex oligomerization (GO:0051259)	0.0819867	0.283751	3.04422	RNF213;MCU;JMJD6	RNF213;MCU;JMJD6
regulation of actin cytoskeleton organization (GO:0032956)	0.0841079	0.283751	3.00948	PDGFRA;DLC1;CORO1A	PDGFRA;DLC1;CORO1A
sensory perception of sound (GO:0007605)	0.0841079	0.283751	3.00948	COL1A1;CACNA1D;CRYM	COL1A1;CACNA1D;CRYM
toll-like receptor signaling pathway (GO:0002224)	0.0841079	0.283751	3.00948	PLCG2;LBP;LGMN	PLCG2;LBP;LGMN
positive regulation of supramolecular fiber organization (GO:1902905)	0.0841079	0.283751	3.00948	CCL21;ALOX15;APOE	CCL21;ALOX15;APOE
positive regulation of transport (GO:0051050)	0.0841079	0.283751	3.00948	AHSG;APOE;DLL1	AHSG;APOE;DLL1
regulation of cell-substrate adhesion (GO:0010810)	0.0849077	0.283751	4.29726	ALOX15;SPOCK1	ALOX15;SPOCK1
cellular response to glucose starvation (GO:0042149)	0.0849077	0.283751	4.29726	BHLHA15;FOXO3	BHLHA15;FOXO3
lipid modification (GO:0030258)	0.0849077	0.283751	4.29726	ALOX15;PLPP3	ALOX15;PLPP3
negative regulation of proteolysis (GO:0045861)	0.0849077	0.283751	4.29726	EPHA4;TIMP1	EPHA4;TIMP1
regulation of endothelial cell proliferation (GO:0001936)	0.0862525	0.283751	2.97551	NR4A1;APOE;VEGFA	NR4A1;APOE;VEGFA
regulation of lipid metabolic process (GO:0019216)	0.0862525	0.283751	2.97551	SCD;ELOVL6;LSS	SCD;ELOVL6;LSS
retinoid metabolic process (GO:0001523)	0.0862525	0.283751	2.97551	SDC1;APOE;BCO1	SDC1;APOE;BCO1
Wnt signaling pathway (GO:0016055)	0.0862525	0.283751	2.97551	FRZB;PLCG2;PLPP3	FRZB;PLCG2;PLPP3
positive regulation of transmembrane receptor protein serine/threonine kinase signaling pathway (GO:0090100)	0.0862525	0.283751	2.97551	CRB2;SLC2A10;CCN1	CRB2;SLC2A10;CCN1
actin filament reorganization (GO:0090527)	0.0869187	0.283751	12.5505	MCU	MCU
proximal/distal pattern formation (GO:0009954)	0.0869187	0.283751	12.5505	DLL1	DLL1
alpha-beta T cell activation (GO:0046631)	0.0869187	0.283751	12.5505	RSAD2	RSAD2
regulation of Cdc42 protein signal transduction (GO:0032489)	0.0869187	0.283751	12.5505	APOE	APOE
regulation of dendritic spine maintenance (GO:1902950)	0.0869187	0.283751	12.5505	APOE	APOE
regulation of extent of cell growth (GO:0061387)	0.0869187	0.283751	12.5505	APOE	APOE
cellular response to hepatocyte growth factor stimulus (GO:0035729)	0.0869187	0.283751	12.5505	LGMN	LGMN
commissural neuron axon guidance (GO:0071679)	0.0869187	0.283751	12.5505	VEGFA	VEGFA
coronary vasculature morphogenesis (GO:0060977)	0.0869187	0.283751	12.5505	VEGFA	VEGFA
regulation of nitrogen compound metabolic process (GO:0051171)	0.0869187	0.283751	12.5505	APOE	APOE
dopamine uptake (GO:0090494)	0.0869187	0.283751	12.5505	SLC22A3	SLC22A3
regulation of positive chemotaxis (GO:0050926)	0.0869187	0.283751	12.5505	VEGFA	VEGFA
regulation of protein localization to cell cortex (GO:1904776)	0.0869187	0.283751	12.5505	SAPCD2	SAPCD2
glyoxylate metabolic process (GO:0046487)	0.0869187	0.283751	12.5505	ALDH4A1	ALDH4A1
response to hepatocyte growth factor (GO:0035728)	0.0869187	0.283751	12.5505	LGMN	LGMN
self proteolysis (GO:0097264)	0.0869187	0.283751	12.5505	LGMN	LGMN
sequestering of BMP from receptor via BMP binding (GO:0038098)	0.0869187	0.283751	12.5505	GREM1	GREM1
skeletal myofibril assembly (GO:0014866)	0.0869187	0.283751	12.5505	ACTA1	ACTA1
lipid import into cell (GO:0140354)	0.0869187	0.283751	12.5505	SLC27A2	SLC27A2
monoamine transport (GO:0015844)	0.0869187	0.283751	12.5505	SLC22A3	SLC22A3
wound healing, spreading of epidermal cells (GO:0035313)	0.0869187	0.283751	12.5505	COL5A1	COL5A1
negative regulation by symbiont of host apoptotic process (GO:0033668)	0.0869187	0.283751	12.5505	RNF213	RNF213
negative regulation by symbiont of host programmed cell death (GO:0052041)	0.0869187	0.283751	12.5505	RNF213	RNF213
negative regulation of actin nucleation (GO:0051126)	0.0869187	0.283751	12.5505	CORO1A	CORO1A
negative regulation of chromosome organization (GO:2001251)	0.0869187	0.283751	12.5505	TOP2A	TOP2A
negative regulation of glial cell apoptotic process (GO:0034351)	0.0869187	0.283751	12.5505	DLL1	DLL1
negative regulation of neuron projection regeneration (GO:0070571)	0.0869187	0.283751	12.5505	EPHA4	EPHA4
negative regulation of osteoblast proliferation (GO:0033689)	0.0869187	0.283751	12.5505	GREM1	GREM1
neuron fate specification (GO:0048665)	0.0869187	0.283751	12.5505	DLL1	DLL1
neurotransmitter reuptake (GO:0098810)	0.0869187	0.283751	12.5505	SLC22A3	SLC22A3
peptidyl-lysine hydroxylation (GO:0017185)	0.0869187	0.283751	12.5505	JMJD6	JMJD6
positive regulation of aspartic-type peptidase activity (GO:1905247)	0.0869187	0.283751	12.5505	EPHA4	EPHA4
positive regulation of cell migration by vascular endothelial growth factor signaling pathway (GO:0038089)	0.0869187	0.283751	12.5505	VEGFA	VEGFA
positive regulation of dendritic cell chemotaxis (GO:2000510)	0.0869187	0.283751	12.5505	CCL21	CCL21
positive regulation of dendritic cell cytokine production (GO:0002732)	0.0869187	0.283751	12.5505	PLCG2	PLCG2
positive regulation of insulin-like growth factor receptor signaling pathway (GO:0043568)	0.0869187	0.283751	12.5505	MYORG	MYORG
positive regulation of myotube differentiation (GO:0010831)	0.0869187	0.283751	12.5505	ATP11A	ATP11A
positive regulation of oligodendrocyte differentiation (GO:0048714)	0.0869187	0.283751	12.5505	TENM4	TENM4
positive regulation of T-helper 2 cell cytokine production (GO:2000553)	0.0869187	0.283751	12.5505	RSAD2	RSAD2
postsynapse organization (GO:0099173)	0.0869187	0.283751	12.5505	LGMN	LGMN
positive regulation of transferase activity (GO:0051347)	0.0872705	0.283751	2.45621	GREM1;EPHA4;PDGFRA;MYC	GREM1;EPHA4;PDGFRA;MYC
branching morphogenesis of an epithelial tube (GO:0048754)	0.0883121	0.283751	4.19473	MYC;VEGFA	MYC;VEGFA
homotypic cell-cell adhesion (GO:0034109)	0.0883121	0.283751	4.19473	PDGFRA;PLPP3	PDGFRA;PLPP3
lymphocyte chemotaxis (GO:0048247)	0.0883121	0.283751	4.19473	CCL8;CCL21	CCL8;CCL21
neurogenesis (GO:0022008)	0.0883121	0.283751	4.19473	DAGLA;SPOCK1	DAGLA;SPOCK1
positive regulation of cell-matrix adhesion (GO:0001954)	0.0883121	0.283751	4.19473	CCL21;VEGFA	CCL21;VEGFA
positive regulation of osteoblast differentiation (GO:0045669)	0.0883121	0.283751	4.19473	TMEM119;CCN1	TMEM119;CCN1
transmembrane receptor protein tyrosine kinase signaling pathway (GO:0007169)	0.0887491	0.283751	1.79576	COL1A1;EPHA4;PDGFRA;MMP2;COL4A6;NGEF;ANGPTL1;VEGFA	COL1A1;EPHA4;PDGFRA;MMP2;COL4A6;NGEF;ANGPTL1;VEGFA
hemopoiesis (GO:0030097)	0.0906107	0.283751	2.90982	TNFRSF13B;ZBTB16;DLL1	TNFRSF13B;ZBTB16;DLL1
negative regulation of MAPK cascade (GO:0043409)	0.0906107	0.283751	2.90982	DUSP1;MYC;APOE	DUSP1;MYC;APOE
inorganic cation transmembrane transport (GO:0098662)	0.0913509	0.283751	1.98501	TRPV2;SLC6A12;CACNA1D;ASIC3;KCNK3;CACNA1G	TRPV2;SLC6A12;CACNA1D;ASIC3;KCNK3;CACNA1G
regulation of insulin receptor signaling pathway (GO:0046626)	0.0917566	0.283751	4.09697	AHSG;VWA2	AHSG;VWA2
chromosome condensation (GO:0030261)	0.0917566	0.283751	4.09697	TOP2A;NCAPG	TOP2A;NCAPG
regulation of pri-miRNA transcription by RNA polymerase II (GO:1902893)	0.0917566	0.283751	4.09697	FOS;FOXO3	FOS;FOXO3
regulation of cell migration (GO:0030334)	0.0926128	0.283751	1.77743	NTNG1;COL1A1;EPHA4;PDGFRA;DLC1;CCN1;FOXO3;VEGFA	NTNG1;COL1A1;EPHA4;PDGFRA;DLC1;CCN1;FOXO3;VEGFA
regulation of telomerase activity (GO:0051972)	0.0952398	0.283751	4.00365	GREM1;MYC	GREM1;MYC
negative regulation of tumor necrosis factor production (GO:0032720)	0.0952398	0.283751	4.00365	NLRC3;LBP	NLRC3;LBP
positive regulation of organelle assembly (GO:1902117)	0.0952398	0.283751	4.00365	SDC1;CAPG	SDC1;CAPG
positive regulation of response to stimulus (GO:0048584)	0.0952398	0.283751	4.00365	RSAD2;MYC	RSAD2;MYC
positive regulation of smooth muscle cell proliferation (GO:0048661)	0.0952398	0.283751	4.00365	MMP2;SERPINF2	MMP2;SERPINF2
adult heart development (GO:0007512)	0.0972406	0.283751	10.9811	MYH7	MYH7
quaternary ammonium group transport (GO:0015697)	0.0972406	0.283751	10.9811	SLC22A3	SLC22A3
regulation of animal organ morphogenesis (GO:2000027)	0.0972406	0.283751	10.9811	SAPCD2	SAPCD2
associative learning (GO:0008306)	0.0972406	0.283751	10.9811	LGMN	LGMN
regulation of aspartic-type endopeptidase activity involved in amyloid precursor protein catabolic process (GO:1902959)	0.0972406	0.283751	10.9811	EPHA4	EPHA4
basement membrane assembly (GO:0070831)	0.0972406	0.283751	10.9811	NTNG1	NTNG1
regulation of dendritic cell antigen processing and presentation (GO:0002604)	0.0972406	0.283751	10.9811	CCL21	CCL21
regulation of interleukin-23 production (GO:0032667)	0.0972406	0.283751	10.9811	PLCG2	PLCG2
cholesterol catabolic process (GO:0006707)	0.0972406	0.283751	10.9811	APOE	APOE
chylomicron remodeling (GO:0034371)	0.0972406	0.283751	10.9811	APOE	APOE
DNA topological change (GO:0006265)	0.0972406	0.283751	10.9811	TOP2A	TOP2A
regulation of peroxisome proliferator activated receptor signaling pathway (GO:0035358)	0.0972406	0.283751	10.9811	ALOX15	ALOX15
embryonic digestive tract morphogenesis (GO:0048557)	0.0972406	0.283751	10.9811	PDGFRA	PDGFRA
endochondral ossification (GO:0001958)	0.0972406	0.283751	10.9811	TMEM119	TMEM119
estrogen biosynthetic process (GO:0006703)	0.0972406	0.283751	10.9811	HSD17B14	HSD17B14
fatty acid alpha-oxidation (GO:0001561)	0.0972406	0.283751	10.9811	SLC27A2	SLC27A2
glomerular filtration (GO:0003094)	0.0972406	0.283751	10.9811	TBC1D8B	TBC1D8B
hepoxilin biosynthetic process (GO:0051122)	0.0972406	0.283751	10.9811	ALOX15	ALOX15
hepoxilin metabolic process (GO:0051121)	0.0972406	0.283751	10.9811	ALOX15	ALOX15
response to type I interferon (GO:0034340)	0.0972406	0.283751	10.9811	ISG15	ISG15
response to vitamin (GO:0033273)	0.0972406	0.283751	10.9811	SPP1	SPP1
response to vitamin D (GO:0033280)	0.0972406	0.283751	10.9811	SPP1	SPP1
hormone transport (GO:0009914)	0.0972406	0.283751	10.9811	CRYM	CRYM
Schwann cell development (GO:0014044)	0.0972406	0.283751	10.9811	CNTNAP1	CNTNAP1
sensory organ morphogenesis (GO:0090596)	0.0972406	0.283751	10.9811	COL5A1	COL5A1
kinetochore assembly (GO:0051382)	0.0972406	0.283751	10.9811	DLGAP5	DLGAP5
sterol catabolic process (GO:0016127)	0.0972406	0.283751	10.9811	APOE	APOE
lipoprotein metabolic process (GO:0042157)	0.0972406	0.283751	10.9811	APOE	APOE
maintenance of apical/basal cell polarity (GO:0035090)	0.0972406	0.283751	10.9811	CRB2	CRB2
maintenance of epithelial cell apical/basal polarity (GO:0045199)	0.0972406	0.283751	10.9811	CRB2	CRB2
mesodermal cell differentiation (GO:0048333)	0.0972406	0.283751	10.9811	ITGA2	ITGA2
type B pancreatic cell differentiation (GO:0003309)	0.0972406	0.283751	10.9811	DLL1	DLL1
very-low-density lipoprotein particle remodeling (GO:0034372)	0.0972406	0.283751	10.9811	APOE	APOE
negative regulation of bone resorption (GO:0045779)	0.0972406	0.283751	10.9811	TMEM119	TMEM119
negative regulation of fibrinolysis (GO:0051918)	0.0972406	0.283751	10.9811	SERPINF2	SERPINF2
negative regulation of glycoprotein biosynthetic process (GO:0010561)	0.0972406	0.283751	10.9811	SLC2A10	SLC2A10
negative regulation of leukocyte proliferation (GO:0070664)	0.0972406	0.283751	10.9811	GREM1	GREM1
negative regulation of pathway-restricted SMAD protein phosphorylation (GO:0060394)	0.0972406	0.283751	10.9811	GREM1	GREM1
neurotransmitter receptor transport to postsynaptic membrane (GO:0098969)	0.0972406	0.283751	10.9811	GRIP2	GRIP2
nucleoside diphosphate phosphorylation (GO:0006165)	0.0972406	0.283751	10.9811	AK4	AK4
nucleoside triphosphate biosynthetic process (GO:0009142)	0.0972406	0.283751	10.9811	AK4	AK4
nucleotide phosphorylation (GO:0046939)	0.0972406	0.283751	10.9811	AK4	AK4
organic cyclic compound catabolic process (GO:1901361)	0.0972406	0.283751	10.9811	HSD17B14	HSD17B14
peripheral nervous system axon ensheathment (GO:0032292)	0.0972406	0.283751	10.9811	CNTNAP1	CNTNAP1
positive regulation of blood vessel endothelial cell proliferation involved in sprouting angiogenesis (GO:1903589)	0.0972406	0.283751	10.9811	VEGFA	VEGFA
positive regulation of cell-cell adhesion mediated by cadherin (GO:2000049)	0.0972406	0.283751	10.9811	SERPINF2	SERPINF2
positive regulation of cholesterol esterification (GO:0010873)	0.0972406	0.283751	10.9811	APOE	APOE
positive regulation of macrophage cytokine production (GO:0060907)	0.0972406	0.283751	10.9811	PLCG2	PLCG2
positive regulation of mitochondrial calcium ion concentration (GO:0051561)	0.0972406	0.283751	10.9811	MCU	MCU
positive regulation of protein kinase C signaling (GO:0090037)	0.0972406	0.283751	10.9811	VEGFA	VEGFA
positive regulation of synapse maturation (GO:0090129)	0.0972406	0.283751	10.9811	CDC20	CDC20
regulation of MAP kinase activity (GO:0043405)	0.0973165	0.283751	2.81653	DUSP1;APOE;VEGFA	DUSP1;APOE;VEGFA
glycosaminoglycan biosynthetic process (GO:0006024)	0.0973165	0.283751	2.81653	VCAN;SDC1;FMOD	VCAN;SDC1;FMOD
positive regulation of protein kinase activity (GO:0045860)	0.0974307	0.283751	2.35724	EPHA4;CCL21;CCN1;VEGFA	EPHA4;CCL21;CCN1;VEGFA
positive regulation of cell-cell adhesion (GO:0022409)	0.0987605	0.286693	3.91448	SERPINF2;PLPP3	SERPINF2;PLPP3
positive regulation of neuron death (GO:1901216)	0.0987605	0.286693	3.91448	FOS;FOXO3	FOS;FOXO3
regulation of neuron apoptotic process (GO:0043523)	0.0995955	0.28865	2.78674	APOE;FOXO3;LGMN	APOE;FOXO3;LGMN
positive regulation of stress-activated MAPK cascade (GO:0032874)	0.101896	0.292946	2.75757	CCL21;SERPINF2;VEGFA	CCL21;SERPINF2;VEGFA
negative regulation of MAP kinase activity (GO:0043407)	0.102317	0.292946	3.82919	DUSP1;APOE	DUSP1;APOE
negative regulation of tumor necrosis factor superfamily cytokine production (GO:1903556)	0.102317	0.292946	3.82919	NLRC3;LBP	NLRC3;LBP
organic acid transport (GO:0015849)	0.104218	0.292946	2.729	SLC43A2;SLC6A12;SFXN5	SLC43A2;SLC6A12;SFXN5
cellular response to growth factor stimulus (GO:0071363)	0.104498	0.292946	2.29554	NR4A1;ACVR1C;LGMN;VEGFA	NR4A1;ACVR1C;LGMN;VEGFA
regulation of cellular protein metabolic process (GO:0032268)	0.105909	0.292946	3.74753	APOE;FOXO3	APOE;FOXO3
regulation of interferon-beta production (GO:0032648)	0.105909	0.292946	3.74753	NLRC3;ISG15	NLRC3;ISG15
regulation of stress-activated MAPK cascade (GO:0032872)	0.105909	0.292946	3.74753	GREM1;MYC	GREM1;MYC
positive regulation of actin filament polymerization (GO:0030838)	0.105909	0.292946	3.74753	CCL21;ALOX15	CCL21;ALOX15
positive regulation of cell motility (GO:2000147)	0.106197	0.292946	2.04856	COL1A1;PDGFRA;CCL21;CCN1;VEGFA	COL1A1;PDGFRA;CCL21;CCN1;VEGFA
positive regulation of programmed cell death (GO:0043068)	0.10641	0.292946	1.89877	TOP2A;PREX1;ACVR1C;FRZB;FOXO3;NGEF	TOP2A;PREX1;ACVR1C;FRZB;FOXO3;NGEF
acetyl-CoA biosynthetic process (GO:0006085)	0.107446	0.292946	9.76049	ACLY	ACLY
regulation of axon guidance (GO:1902667)	0.107446	0.292946	9.76049	VEGFA	VEGFA
B cell homeostasis (GO:0001782)	0.107446	0.292946	9.76049	TNFRSF13B	TNFRSF13B
calcium import into the mitochondrion (GO:0036444)	0.107446	0.292946	9.76049	MCU	MCU
regulation of DNA methylation (GO:0044030)	0.107446	0.292946	9.76049	MYC	MYC
regulation of glycoprotein biosynthetic process (GO:0010559)	0.107446	0.292946	9.76049	CCL21	CCL21
chylomicron assembly (GO:0034378)	0.107446	0.292946	9.76049	APOE	APOE
regulation of leukocyte tethering or rolling (GO:1903236)	0.107446	0.292946	9.76049	CCL21	CCL21
complement activation, lectin pathway (GO:0001867)	0.107446	0.292946	9.76049	MASP1	MASP1
regulation of phagocytosis, engulfment (GO:0060099)	0.107446	0.292946	9.76049	ALOX15	ALOX15
regulation of podosome assembly (GO:0071801)	0.107446	0.292946	9.76049	CAPG	CAPG
renal filtration (GO:0097205)	0.107446	0.292946	9.76049	TBC1D8B	TBC1D8B
granulocyte activation (GO:0036230)	0.107446	0.292946	9.76049	PREX1	PREX1
lactation (GO:0007595)	0.107446	0.292946	9.76049	VEGFA	VEGFA
long-chain fatty acid import into cell (GO:0044539)	0.107446	0.292946	9.76049	SLC27A2	SLC27A2
membrane lipid catabolic process (GO:0046466)	0.107446	0.292946	9.76049	SMPDL3B	SMPDL3B
toxin transport (GO:1901998)	0.107446	0.292946	9.76049	SLC22A3	SLC22A3
modification-dependent macromolecule catabolic process (GO:0043632)	0.107446	0.292946	9.76049	ISG15	ISG15
negative regulation of cell-cell adhesion mediated by cadherin (GO:2000048)	0.107446	0.292946	9.76049	VEGFA	VEGFA
negative regulation of cellular protein catabolic process (GO:1903363)	0.107446	0.292946	9.76049	EPHA4	EPHA4
negative regulation of extracellular matrix organization (GO:1903054)	0.107446	0.292946	9.76049	FAP	FAP
negative regulation of interferon-beta production (GO:0032688)	0.107446	0.292946	9.76049	NLRC3	NLRC3
negative regulation of phosphatidylinositol 3-kinase signaling (GO:0014067)	0.107446	0.292946	9.76049	NLRC3	NLRC3
neuron projection fasciculation (GO:0106030)	0.107446	0.292946	9.76049	EPHA4	EPHA4
peptidyl-amino acid modification (GO:0018193)	0.107446	0.292946	9.76049	FKBP10	FKBP10
pinocytosis (GO:0006907)	0.107446	0.292946	9.76049	AHSG	AHSG
positive regulation of mesenchymal cell proliferation (GO:0002053)	0.107446	0.292946	9.76049	MYC	MYC
positive regulation of skeletal muscle tissue development (GO:0048643)	0.107446	0.292946	9.76049	DLL1	DLL1
mitotic sister chromatid segregation (GO:0000070)	0.108923	0.296521	2.6736	KIFC1;NCAPG;DLGAP5	KIFC1;NCAPG;DLGAP5
amino acid transport (GO:0006865)	0.109534	0.296835	3.66927	SLC43A2;SLC6A12	SLC43A2;SLC6A12
neuron migration (GO:0001764)	0.109534	0.296835	3.66927	SPOCK1;VEGFA	SPOCK1;VEGFA
organic hydroxy compound biosynthetic process (GO:1901617)	0.109534	0.296835	3.66927	ALOX15;SLC27A2	ALOX15;SLC27A2
sensory perception (GO:0007600)	0.113192	0.300373	3.59421	TRPV2;ASIC3	TRPV2;ASIC3
heart development (GO:0007507)	0.115524	0.300373	2.20878	COL3A1;DLC1;MYH7;VEGFA	COL3A1;DLC1;MYH7;VEGFA
activation of GTPase activity (GO:0090630)	0.116132	0.300373	2.59457	TBC1D8B;CCL21;NGEF	TBC1D8B;CCL21;NGEF
regulation of JNK cascade (GO:0046328)	0.116132	0.300373	2.59457	CCL21;SERPINF2;KLHL31	CCL21;SERPINF2;KLHL31
negative regulation of BMP signaling pathway (GO:0030514)	0.116881	0.300373	3.52214	GREM1;SOST	GREM1;SOST
negative regulation of protein-containing complex assembly (GO:0031333)	0.116881	0.300373	3.52214	NLRC3;SOST	NLRC3;SOST
plasma membrane bounded cell projection morphogenesis (GO:0120039)	0.116881	0.300373	3.52214	CNTNAP1;DCLK1	CNTNAP1;DCLK1
regulation of neuron projection development (GO:0010975)	0.11741	0.300373	2.19495	NTNG1;EPHA4;SPOCK1;APOE	NTNG1;EPHA4;SPOCK1;APOE
actin filament network formation (GO:0051639)	0.117537	0.300373	8.784	FHOD3	FHOD3
purine nucleoside bisphosphate biosynthetic process (GO:0034033)	0.117537	0.300373	8.784	SLC25A16	SLC25A16
alcohol catabolic process (GO:0046164)	0.117537	0.300373	8.784	APOE	APOE
angiogenesis involved in wound healing (GO:0060055)	0.117537	0.300373	8.784	VEGFA	VEGFA
regulation of cardiac muscle cell differentiation (GO:2000725)	0.117537	0.300373	8.784	GREM1	GREM1
camera-type eye morphogenesis (GO:0048593)	0.117537	0.300373	8.784	VEGFA	VEGFA
regulation of dendritic cell apoptotic process (GO:2000668)	0.117537	0.300373	8.784	CCL21	CCL21
cellular glucan metabolic process (GO:0006073)	0.117537	0.300373	8.784	PYGM	PYGM
coenzyme A biosynthetic process (GO:0015937)	0.117537	0.300373	8.784	SLC25A16	SLC25A16
regulation of mesenchymal cell proliferation (GO:0010464)	0.117537	0.300373	8.784	MYC	MYC
regulation of mitochondrial depolarization (GO:0051900)	0.117537	0.300373	8.784	IFI6	IFI6
regulation of stress-activated protein kinase signaling cascade (GO:0070302)	0.117537	0.300373	8.784	GREM1	GREM1
fatty acid homeostasis (GO:0055089)	0.117537	0.300373	8.784	APOE	APOE
regulation of synapse maturation (GO:0090128)	0.117537	0.300373	8.784	CDC20	CDC20
regulation of T-helper 2 cell cytokine production (GO:2000551)	0.117537	0.300373	8.784	RSAD2	RSAD2
regulation of toll-like receptor 9 signaling pathway (GO:0034163)	0.117537	0.300373	8.784	RSAD2	RSAD2
glutathione biosynthetic process (GO:0006750)	0.117537	0.300373	8.784	GSS	GSS
response to prostaglandin E (GO:0034695)	0.117537	0.300373	8.784	CCL21	CCL21
ribonucleoside bisphosphate biosynthetic process (GO:0034030)	0.117537	0.300373	8.784	SLC25A16	SLC25A16
induction of positive chemotaxis (GO:0050930)	0.117537	0.300373	8.784	VEGFA	VEGFA
lipoprotein biosynthetic process (GO:0042158)	0.117537	0.300373	8.784	APOE	APOE
lipoprotein catabolic process (GO:0042159)	0.117537	0.300373	8.784	APOE	APOE
mesonephros development (GO:0001823)	0.117537	0.300373	8.784	ZBTB16	ZBTB16
mitochondrial transcription (GO:0006390)	0.117537	0.300373	8.784	FOXO3	FOXO3
monocyte differentiation (GO:0030224)	0.117537	0.300373	8.784	VEGFA	VEGFA
positive regulation by host of viral process (GO:0044794)	0.117537	0.300373	8.784	APOE	APOE
positive regulation of bone resorption (GO:0045780)	0.117537	0.300373	8.784	SPP1	SPP1
positive regulation of chondrocyte differentiation (GO:0032332)	0.117537	0.300373	8.784	ZBTB16	ZBTB16
positive regulation of myelination (GO:0031643)	0.117537	0.300373	8.784	TENM4	TENM4
positive regulation of neuroblast proliferation (GO:0002052)	0.117537	0.300373	8.784	VEGFA	VEGFA
positive regulation of phospholipid transport (GO:2001140)	0.117537	0.300373	8.784	APOE	APOE
positive regulation of transforming growth factor beta production (GO:0071636)	0.117537	0.300373	8.784	SERPINF2	SERPINF2
regulation of MAPK cascade (GO:0043408)	0.119309	0.304444	2.18129	GREM1;DUSP1;PLCG2;CCN1	GREM1;DUSP1;PLCG2;CCN1
heart morphogenesis (GO:0003007)	0.1206	0.304444	3.45291	DLC1;VEGFA	DLC1;VEGFA
response to calcium ion (GO:0051592)	0.121035	0.304444	2.54441	ALOX15;PLCG2;LGMN	ALOX15;PLCG2;LGMN
negative regulation of transmembrane receptor protein serine/threonine kinase signaling pathway (GO:0090101)	0.123515	0.304444	2.52005	GREM1;SLC2A10;SOST	GREM1;SLC2A10;SOST
regulation of focal adhesion assembly (GO:0051893)	0.124349	0.304444	3.38633	DLC1;VEGFA	DLC1;VEGFA
negative regulation of viral genome replication (GO:0045071)	0.124349	0.304444	3.38633	RSAD2;ISG15	RSAD2;ISG15
positive regulation of leukocyte chemotaxis (GO:0002690)	0.124349	0.304444	3.38633	VEGFA;LGMN	VEGFA;LGMN
cell-cell adhesion via plasma-membrane adhesion molecules (GO:0098742)	0.127037	0.304444	2.1283	NTNG1;CRB2;TENM4;CDH11	NTNG1;CRB2;TENM4;CDH11
regulation of actin nucleation (GO:0051125)	0.127515	0.304444	7.98505	CORO1A	CORO1A
regulation of amyloid precursor protein catabolic process (GO:1902991)	0.127515	0.304444	7.98505	APOE	APOE
regulation of astrocyte differentiation (GO:0048710)	0.127515	0.304444	7.98505	EPHA4	EPHA4
regulation of axon regeneration (GO:0048679)	0.127515	0.304444	7.98505	EPHA4	EPHA4
axonal fasciculation (GO:0007413)	0.127515	0.304444	7.98505	EPHA4	EPHA4
regulation of cholesterol esterification (GO:0010872)	0.127515	0.304444	7.98505	APOE	APOE
dermatan sulfate biosynthetic process (GO:0030208)	0.127515	0.304444	7.98505	VCAN	VCAN
regulation of muscle system process (GO:0090257)	0.127515	0.304444	7.98505	TNNC2	TNNC2
regulation of plasminogen activation (GO:0010755)	0.127515	0.304444	7.98505	SERPINF2	SERPINF2
regulation of pseudopodium assembly (GO:0031272)	0.127515	0.304444	7.98505	CCL21	CCL21
eye photoreceptor cell differentiation (GO:0001754)	0.127515	0.304444	7.98505	VEGFA	VEGFA
gas transport (GO:0015669)	0.127515	0.304444	7.98505	MYC	MYC
hemidesmosome assembly (GO:0031581)	0.127515	0.304444	7.98505	KRT5	KRT5
sensory perception of taste (GO:0050909)	0.127515	0.304444	7.98505	ASIC3	ASIC3
keratan sulfate catabolic process (GO:0042340)	0.127515	0.304444	7.98505	FMOD	FMOD
lysine catabolic process (GO:0006554)	0.127515	0.304444	7.98505	CRYM	CRYM
lysine metabolic process (GO:0006553)	0.127515	0.304444	7.98505	CRYM	CRYM
mesoderm morphogenesis (GO:0048332)	0.127515	0.304444	7.98505	CRB2	CRB2
tricarboxylic acid metabolic process (GO:0072350)	0.127515	0.304444	7.98505	ACLY	ACLY
mitochondrial genome maintenance (GO:0000002)	0.127515	0.304444	7.98505	SLC25A36	SLC25A36
mitotic nuclear membrane disassembly (GO:0007077)	0.127515	0.304444	7.98505	LPIN1	LPIN1
modulation by host of viral process (GO:0044788)	0.127515	0.304444	7.98505	APOE	APOE
negative regulation by host of viral process (GO:0044793)	0.127515	0.304444	7.98505	CCL8	CCL8
negative regulation of amyloid fibril formation (GO:1905907)	0.127515	0.304444	7.98505	APOE	APOE
negative regulation of B cell proliferation (GO:0030889)	0.127515	0.304444	7.98505	TNFRSF13B	TNFRSF13B
negative regulation of cell division (GO:0051782)	0.127515	0.304444	7.98505	MYC	MYC
negative regulation of hemostasis (GO:1900047)	0.127515	0.304444	7.98505	APOE	APOE
negative regulation of leukocyte apoptotic process (GO:2000107)	0.127515	0.304444	7.98505	CCL21	CCL21
negative regulation of vascular permeability (GO:0043116)	0.127515	0.304444	7.98505	VEGFA	VEGFA
neurotransmitter uptake (GO:0001504)	0.127515	0.304444	7.98505	SLC22A3	SLC22A3
nonribosomal peptide biosynthetic process (GO:0019184)	0.127515	0.304444	7.98505	GSS	GSS
phagolysosome assembly (GO:0001845)	0.127515	0.304444	7.98505	CORO1A	CORO1A
phospholipid efflux (GO:0033700)	0.127515	0.304444	7.98505	APOE	APOE
positive regulation of branching involved in ureteric bud morphogenesis (GO:0090190)	0.127515	0.304444	7.98505	VEGFA	VEGFA
positive regulation of cardiocyte differentiation (GO:1905209)	0.127515	0.304444	7.98505	GREM1	GREM1
positive regulation of metaphase/anaphase transition of cell cycle (GO:1902101)	0.127515	0.304444	7.98505	DLGAP5	DLGAP5
positive regulation of mitotic metaphase/anaphase transition (GO:0045842)	0.127515	0.304444	7.98505	DLGAP5	DLGAP5
positive regulation of mitotic sister chromatid separation (GO:1901970)	0.127515	0.304444	7.98505	DLGAP5	DLGAP5
positive regulation of pseudopodium assembly (GO:0031274)	0.127515	0.304444	7.98505	CCL21	CCL21
positive regulation of ubiquitin protein ligase activity (GO:1904668)	0.127515	0.304444	7.98505	CDC20	CDC20
positive regulation of vascular permeability (GO:0043117)	0.127515	0.304444	7.98505	VEGFA	VEGFA
regulation of blood vessel endothelial cell migration (GO:0043535)	0.128125	0.304444	3.32227	APOE;VEGFA	APOE;VEGFA
ceramide metabolic process (GO:0006672)	0.128125	0.304444	3.32227	SPTLC3;PLPP3	SPTLC3;PLPP3
triglyceride metabolic process (GO:0006641)	0.128125	0.304444	3.32227	APOE;LPIN1	APOE;LPIN1
negative regulation of cytokine-mediated signaling pathway (GO:0001960)	0.128125	0.304444	3.32227	PELI3;ISG15	PELI3;ISG15
regulation of interleukin-6 production (GO:0032675)	0.12853	0.304602	2.4727	PLCG2;NLRC3;LBP	PLCG2;NLRC3;LBP
response to tumor necrosis factor (GO:0034612)	0.12853	0.304602	2.4727	CCL8;CCL21;AFF3	CCL8;CCL21;AFF3
neuron projection development (GO:0031175)	0.129001	0.305315	2.11544	EPHA4;CNTNAP1;APOE;DCLK1	EPHA4;CNTNAP1;APOE;DCLK1
blood vessel morphogenesis (GO:0048514)	0.131927	0.307305	3.26058	SERPINF2;VEGFA	SERPINF2;VEGFA
chemokine-mediated signaling pathway (GO:0070098)	0.131927	0.307305	3.26058	CCL8;CCL21	CCL8;CCL21
peptidyl-tyrosine modification (GO:0018212)	0.131927	0.307305	3.26058	EPHA4;PDGFRA	EPHA4;PDGFRA
arachidonic acid metabolic process (GO:0019369)	0.135756	0.307305	3.20114	DAGLA;ALOX15	DAGLA;ALOX15
carboxylic acid transport (GO:0046942)	0.135756	0.307305	3.20114	SLC16A12;SLC6A12	SLC16A12;SLC6A12
cellular response to peptide (GO:1901653)	0.135756	0.307305	3.20114	EPHA4;LGMN	EPHA4;LGMN
renal system development (GO:0072001)	0.135756	0.307305	3.20114	IFT27;VEGFA	IFT27;VEGFA
icosanoid metabolic process (GO:0006690)	0.135756	0.307305	3.20114	DAGLA;ALOX15	DAGLA;ALOX15
monocarboxylic acid transport (GO:0015718)	0.135756	0.307305	3.20114	SLC16A12;SLC6A12	SLC16A12;SLC6A12
sulfur compound biosynthetic process (GO:0044272)	0.136186	0.307305	2.40489	VCAN;GSS;FMOD	VCAN;GSS;FMOD
regulation of apoptotic process (GO:0042981)	0.136327	0.307305	1.46286	TOP2A;GREM1;PREX1;KRT18;ACVR1C;FRZB;MYC;IFI6;DHCR24;FOXO3;NGEF;VEGFA	TOP2A;GREM1;PREX1;KRT18;ACVR1C;FRZB;MYC;IFI6;DHCR24;FOXO3;NGEF;VEGFA
purine ribonucleoside triphosphate metabolic process (GO:0009205)	0.13738	0.307305	7.31926	AK4	AK4
purine-containing compound salvage (GO:0043101)	0.13738	0.307305	7.31926	APRT	APRT
AMP metabolic process (GO:0046033)	0.13738	0.307305	7.31926	AK4	AK4
antifungal innate immune response (GO:0061760)	0.13738	0.307305	7.31926	PLCG2	PLCG2
cardiac cell development (GO:0055006)	0.13738	0.307305	7.31926	VEGFA	VEGFA
cellular biogenic amine metabolic process (GO:0006576)	0.13738	0.307305	7.31926	SLC22A3	SLC22A3
central nervous system projection neuron axonogenesis (GO:0021952)	0.13738	0.307305	7.31926	EPHA4	EPHA4
chondroitin sulfate catabolic process (GO:0030207)	0.13738	0.307305	7.31926	VCAN	VCAN
regulation of mitotic cell cycle spindle assembly checkpoint (GO:0090266)	0.13738	0.307305	7.31926	DUSP1	DUSP1
dermatan sulfate metabolic process (GO:0030205)	0.13738	0.307305	7.31926	VCAN	VCAN
DNA catabolic process (GO:0006308)	0.13738	0.307305	7.31926	TREX1	TREX1
endochondral bone morphogenesis (GO:0060350)	0.13738	0.307305	7.31926	TMEM119	TMEM119
fatty acid elongation (GO:0030497)	0.13738	0.307305	7.31926	ELOVL6	ELOVL6
glucose import (GO:0046323)	0.13738	0.307305	7.31926	SLC2A10	SLC2A10
high-density lipoprotein particle assembly (GO:0034380)	0.13738	0.307305	7.31926	APOE	APOE
inner dynein arm assembly (GO:0036159)	0.13738	0.307305	7.31926	DNAH1	DNAH1
kinetochore organization (GO:0051383)	0.13738	0.307305	7.31926	DLGAP5	DLGAP5
sphingoid biosynthetic process (GO:0046520)	0.13738	0.307305	7.31926	SPTLC3	SPTLC3
sphingosine biosynthetic process (GO:0046512)	0.13738	0.307305	7.31926	SPTLC3	SPTLC3
spinal cord development (GO:0021510)	0.13738	0.307305	7.31926	DLL1	DLL1
lipid oxidation (GO:0034440)	0.13738	0.307305	7.31926	ALOX15	ALOX15
mature B cell differentiation involved in immune response (GO:0002313)	0.13738	0.307305	7.31926	DLL1	DLL1
triglyceride-rich lipoprotein particle remodeling (GO:0034370)	0.13738	0.307305	7.31926	APOE	APOE
very long-chain fatty acid biosynthetic process (GO:0042761)	0.13738	0.307305	7.31926	ELOVL6	ELOVL6
myelination in peripheral nervous system (GO:0022011)	0.13738	0.307305	7.31926	CNTNAP1	CNTNAP1
negative regulation of alcohol biosynthetic process (GO:1902931)	0.13738	0.307305	7.31926	APOE	APOE
negative regulation of myoblast differentiation (GO:0045662)	0.13738	0.307305	7.31926	DLL1	DLL1
positive regulation of calcium ion-dependent exocytosis (GO:0045956)	0.13738	0.307305	7.31926	CACNA1G	CACNA1G
positive regulation of calcium-mediated signaling (GO:0050850)	0.13738	0.307305	7.31926	PLCG2	PLCG2
positive regulation of histone deacetylation (GO:0031065)	0.13738	0.307305	7.31926	VEGFA	VEGFA
positive regulation of reactive oxygen species biosynthetic process (GO:1903428)	0.13738	0.307305	7.31926	PLCG2	PLCG2
positive regulation of steroid metabolic process (GO:0045940)	0.13738	0.307305	7.31926	APOE	APOE
protein localization to mitochondrion (GO:0070585)	0.13738	0.307305	7.31926	ISG15	ISG15
cellular response to transforming growth factor beta stimulus (GO:0071560)	0.138772	0.309649	2.38311	COL3A1;COL1A2;FOS	COL3A1;COL1A2;FOS
negative regulation of cell motility (GO:2000146)	0.138772	0.309649	2.38311	EPHA4;DLC1;FOXO3	EPHA4;DLC1;FOXO3
cellular iron ion homeostasis (GO:0006879)	0.139609	0.310357	3.14381	HEPHL1;MYC	HEPHL1;MYC
chordate embryonic development (GO:0043009)	0.139609	0.310357	3.14381	COL1A1;VEGFA	COL1A1;VEGFA
muscle organ development (GO:0007517)	0.139609	0.310357	3.14381	EVC;COL6A3	EVC;COL6A3
glycerophospholipid biosynthetic process (GO:0046474)	0.14105	0.311271	2.04145	PHOSPHO1;ALOX15;PLCG2;LPIN1	PHOSPHO1;ALOX15;PLCG2;LPIN1
negative regulation of immune response (GO:0050777)	0.143101	0.311271	2.02962	COL3A1;ALOX15;PLCG2;NLRC3	COL3A1;ALOX15;PLCG2;NLRC3
protein polymerization (GO:0051258)	0.143485	0.311271	3.0885	PREX1;DIAPH3	PREX1;DIAPH3
fatty acid oxidation (GO:0019395)	0.143485	0.311271	3.0885	ALOX15;SLC27A2	ALOX15;SLC27A2
phospholipid transport (GO:0015914)	0.143485	0.311271	3.0885	ATP11A;APOE	ATP11A;APOE
regulation of protein-containing complex assembly (GO:0043254)	0.143995	0.311271	2.34069	APOE;SOST;VEGFA	APOE;SOST;VEGFA
sphingolipid metabolic process (GO:0006665)	0.143995	0.311271	2.34069	SPTLC3;ELOVL6;PLPP3	SPTLC3;ELOVL6;PLPP3
tumor necrosis factor-mediated signaling pathway (GO:0033209)	0.143995	0.311271	2.34069	TNFRSF13B;TNFRSF9;FOXO3	TNFRSF13B;TNFRSF9;FOXO3
regulation of immune response (GO:0050776)	0.145163	0.311271	2.01792	COL1A1;COL3A1;COL1A2;RSAD2	COL1A1;COL3A1;COL1A2;RSAD2
positive regulation of macromolecule metabolic process (GO:0010604)	0.1458	0.311271	1.64455	GREM1;ACTA1;SLC2A10;MYC;PLCG2;TMEM119;VEGFA	GREM1;ACTA1;SLC2A10;MYC;PLCG2;TMEM119;VEGFA
protein modification by small protein conjugation or removal (GO:0070647)	0.147133	0.311271	6.7559	UBA7	UBA7
activation of cysteine-type endopeptidase activity (GO:0097202)	0.147133	0.311271	6.7559	LGMN	LGMN
branching involved in blood vessel morphogenesis (GO:0001569)	0.147133	0.311271	6.7559	VEGFA	VEGFA
calcium ion import across plasma membrane (GO:0098703)	0.147133	0.311271	6.7559	TRPV2	TRPV2
regulation of cell projection organization (GO:0031344)	0.147133	0.311271	6.7559	NTNG1	NTNG1
cGMP-mediated signaling (GO:0019934)	0.147133	0.311271	6.7559	APOE	APOE
regulation of macrophage cytokine production (GO:0010935)	0.147133	0.311271	6.7559	PLCG2	PLCG2
detection of bacterium (GO:0016045)	0.147133	0.311271	6.7559	PGLYRP1	PGLYRP1
regulation of protein kinase C signaling (GO:0090036)	0.147133	0.311271	6.7559	VEGFA	VEGFA
retinal metabolic process (GO:0042574)	0.147133	0.311271	6.7559	BCO1	BCO1
sequestering of extracellular ligand from receptor (GO:0035581)	0.147133	0.311271	6.7559	GREM1	GREM1
striated muscle cell development (GO:0055002)	0.147133	0.311271	6.7559	SDC1	SDC1
substrate-dependent cell migration (GO:0006929)	0.147133	0.311271	6.7559	ITGA2	ITGA2
synaptic membrane adhesion (GO:0099560)	0.147133	0.311271	6.7559	NTNG1	NTNG1
vascular endothelial growth factor signaling pathway (GO:0038084)	0.147133	0.311271	6.7559	VEGFA	VEGFA
negative regulation of cartilage development (GO:0061037)	0.147133	0.311271	6.7559	GREM1	GREM1
negative regulation of coagulation (GO:0050819)	0.147133	0.311271	6.7559	APOE	APOE
neuron fate commitment (GO:0048663)	0.147133	0.311271	6.7559	DLL1	DLL1
neurotransmitter biosynthetic process (GO:0042136)	0.147133	0.311271	6.7559	DAGLA	DAGLA
nuclear membrane disassembly (GO:0051081)	0.147133	0.311271	6.7559	LPIN1	LPIN1
nucleoside phosphate biosynthetic process (GO:1901293)	0.147133	0.311271	6.7559	AK4	AK4
nucleoside triphosphate metabolic process (GO:0009141)	0.147133	0.311271	6.7559	AK4	AK4
ovarian follicle development (GO:0001541)	0.147133	0.311271	6.7559	VEGFA	VEGFA
positive regulation of brown fat cell differentiation (GO:0090336)	0.147133	0.311271	6.7559	FNDC5	FNDC5
positive regulation of cyclase activity (GO:0031281)	0.147133	0.311271	6.7559	CACNA1D	CACNA1D
positive regulation of long-term synaptic potentiation (GO:1900273)	0.147133	0.311271	6.7559	LGMN	LGMN
positive regulation of lymphocyte migration (GO:2000403)	0.147133	0.311271	6.7559	CCL21	CCL21
positive regulation of mitochondrial translation (GO:0070131)	0.147133	0.311271	6.7559	NGRN	NGRN
positive regulation of T cell chemotaxis (GO:0010820)	0.147133	0.311271	6.7559	CCL21	CCL21
positive regulation of type 2 immune response (GO:0002830)	0.147133	0.311271	6.7559	RSAD2	RSAD2
potassium ion export across plasma membrane (GO:0097623)	0.147133	0.311271	6.7559	KCNT2	KCNT2
cellular protein catabolic process (GO:0044257)	0.147384	0.311434	3.0351	FAP;LGMN	FAP;LGMN
positive regulation of protein-containing complex assembly (GO:0031334)	0.149281	0.315071	2.29975	ISG15;CAPG;VEGFA	ISG15;CAPG;VEGFA
regulation of endocytosis (GO:0030100)	0.151305	0.315313	2.9835	APOE;DLL1	APOE;DLL1
iron ion homeostasis (GO:0055072)	0.151305	0.315313	2.9835	HEPHL1;MYC	HEPHL1;MYC
positive regulation of DNA biosynthetic process (GO:2000573)	0.151305	0.315313	2.9835	GREM1;MYC	GREM1;MYC
positive regulation of cysteine-type endopeptidase activity involved in apoptotic process (GO:0043280)	0.151948	0.315313	2.27981	ACVR1C;MYC;DLC1	ACVR1C;MYC;DLC1
cytoskeleton organization (GO:0007010)	0.154629	0.315313	2.2602	CNTNAP1;DIAPH3;APOE	CNTNAP1;DIAPH3;APOE
regulation of neurogenesis (GO:0050767)	0.155246	0.315313	2.93363	SERPINF1;DLL1	SERPINF1;DLL1
acetyl-CoA metabolic process (GO:0006084)	0.156778	0.315313	6.27302	ACLY	ACLY
regulation of aerobic respiration (GO:1903715)	0.156778	0.315313	6.27302	AK4	AK4
regulation of amyloid fibril formation (GO:1905906)	0.156778	0.315313	6.27302	APOE	APOE
regulation of branching involved in ureteric bud morphogenesis (GO:0090189)	0.156778	0.315313	6.27302	VEGFA	VEGFA
calcium ion import into cytosol (GO:1902656)	0.156778	0.315313	6.27302	TRPV2	TRPV2
regulation of endothelial cell chemotaxis (GO:2001026)	0.156778	0.315313	6.27302	LGMN	LGMN
regulation of extracellular matrix disassembly (GO:0010715)	0.156778	0.315313	6.27302	FAP	FAP
dermatan sulfate proteoglycan biosynthetic process (GO:0050651)	0.156778	0.315313	6.27302	VCAN	VCAN
detection of mechanical stimulus involved in sensory perception (GO:0050974)	0.156778	0.315313	6.27302	PIEZO2	PIEZO2
regulation of neuron projection arborization (GO:0150011)	0.156778	0.315313	6.27302	NTNG1	NTNG1
regulation of non-canonical Wnt signaling pathway (GO:2000050)	0.156778	0.315313	6.27302	RNF213	RNF213
regulation of phospholipase C activity (GO:1900274)	0.156778	0.315313	6.27302	PDGFRA	PDGFRA
embryonic cranial skeleton morphogenesis (GO:0048701)	0.156778	0.315313	6.27302	PDGFRA	PDGFRA
endoderm development (GO:0007492)	0.156778	0.315313	6.27302	DUSP1	DUSP1
fibrinolysis (GO:0042730)	0.156778	0.315313	6.27302	SERPINF2	SERPINF2
regulation of T cell chemotaxis (GO:0010819)	0.156778	0.315313	6.27302	CCL21	CCL21
G protein-coupled glutamate receptor signaling pathway (GO:0007216)	0.156778	0.315313	6.27302	DAGLA	DAGLA
glucan catabolic process (GO:0009251)	0.156778	0.315313	6.27302	PYGM	PYGM
glycogen catabolic process (GO:0005980)	0.156778	0.315313	6.27302	PYGM	PYGM
response to acidic pH (GO:0010447)	0.156778	0.315313	6.27302	LGMN	LGMN
GTP metabolic process (GO:0046039)	0.156778	0.315313	6.27302	AK4	AK4
RNA phosphodiester bond hydrolysis, endonucleolytic (GO:0090502)	0.156778	0.315313	6.27302	NYNRIN	NYNRIN
lipoxygenase pathway (GO:0019372)	0.156778	0.315313	6.27302	ALOX15	ALOX15
macrophage differentiation (GO:0030225)	0.156778	0.315313	6.27302	VEGFA	VEGFA
mitochondrial RNA metabolic process (GO:0000959)	0.156778	0.315313	6.27302	FOXO3	FOXO3
modulation by host of viral genome replication (GO:0044827)	0.156778	0.315313	6.27302	CCL8	CCL8
vitamin D metabolic process (GO:0042359)	0.156778	0.315313	6.27302	LGMN	LGMN
myoblast differentiation (GO:0045445)	0.156778	0.315313	6.27302	SDC1	SDC1
myoblast fusion (GO:0007520)	0.156778	0.315313	6.27302	PTGFRN	PTGFRN
negative regulation of chondrocyte differentiation (GO:0032331)	0.156778	0.315313	6.27302	GREM1	GREM1
negative regulation of protein processing (GO:0010955)	0.156778	0.315313	6.27302	SERPINF2	SERPINF2
peptidyl-arginine modification (GO:0018195)	0.156778	0.315313	6.27302	PADI1	PADI1
photoreceptor cell development (GO:0042461)	0.156778	0.315313	6.27302	VEGFA	VEGFA
positive regulation of exosomal secretion (GO:1903543)	0.156778	0.315313	6.27302	SDC1	SDC1
positive regulation of lyase activity (GO:0051349)	0.156778	0.315313	6.27302	CACNA1D	CACNA1D
positive regulation of membrane protein ectodomain proteolysis (GO:0051044)	0.156778	0.315313	6.27302	APOE	APOE
actin cytoskeleton reorganization (GO:0031532)	0.159207	0.319125	2.88539	THSD7A;MCU	THSD7A;MCU
cellular response to reactive oxygen species (GO:0034614)	0.159207	0.319125	2.88539	PDGFRA;FOS	PDGFRA;FOS
monocarboxylic acid biosynthetic process (GO:0072330)	0.159207	0.319125	2.88539	ACLY;SLC27A2	ACLY;SLC27A2
epithelium development (GO:0060429)	0.160037	0.320432	2.22199	UPK1B;DLL1;VEGFA	UPK1B;DLL1;VEGFA
regulation of anatomical structure morphogenesis (GO:0022603)	0.162763	0.321169	2.20336	CRB2;EPHA4;DLL1	CRB2;EPHA4;DLL1
positive regulation of epithelial cell proliferation (GO:0050679)	0.162763	0.321169	2.20336	NR4A1;MYC;VEGFA	NR4A1;MYC;VEGFA
regulation of innate immune response (GO:0045088)	0.163186	0.321169	2.83871	NLRC3;IFI35	NLRC3;IFI35
lipid homeostasis (GO:0055088)	0.163186	0.321169	2.83871	ZBTB20;APOE	ZBTB20;APOE
plasma membrane organization (GO:0007009)	0.163186	0.321169	2.83871	COL5A1;OTOF	COL5A1;OTOF
defense response to symbiont (GO:0140546)	0.165502	0.321169	2.18504	RSAD2;IFI6;ISG15	RSAD2;IFI6;ISG15
regulation of tumor necrosis factor production (GO:0032680)	0.165502	0.321169	2.18504	PLCG2;NLRC3;LBP	PLCG2;NLRC3;LBP
regulation of amyloid-beta clearance (GO:1900221)	0.166313	0.321169	5.85452	APOE	APOE
regulation of ATP biosynthetic process (GO:2001169)	0.166313	0.321169	5.85452	AK4	AK4
regulation of blood vessel endothelial cell proliferation involved in sprouting angiogenesis (GO:1903587)	0.166313	0.321169	5.85452	VEGFA	VEGFA
basement membrane organization (GO:0071711)	0.166313	0.321169	5.85452	NTNG1	NTNG1
body fluid secretion (GO:0007589)	0.166313	0.321169	5.85452	VEGFA	VEGFA
cellular polysaccharide catabolic process (GO:0044247)	0.166313	0.321169	5.85452	PYGM	PYGM
regulation of hormone secretion (GO:0046883)	0.166313	0.321169	5.85452	SCG5	SCG5
dendritic cell chemotaxis (GO:0002407)	0.166313	0.321169	5.85452	CCL21	CCL21
regulation of monocyte differentiation (GO:0045655)	0.166313	0.321169	5.85452	MYC	MYC
digestive tract morphogenesis (GO:0048546)	0.166313	0.321169	5.85452	PDGFRA	PDGFRA
regulation of oxidative phosphorylation (GO:0002082)	0.166313	0.321169	5.85452	AK4	AK4
epiboly involved in wound healing (GO:0090505)	0.166313	0.321169	5.85452	CCN1	CCN1
glutamine family amino acid catabolic process (GO:0009065)	0.166313	0.321169	5.85452	ALDH4A1	ALDH4A1
resolution of meiotic recombination intermediates (GO:0000712)	0.166313	0.321169	5.85452	TOP2A	TOP2A
motor neuron axon guidance (GO:0008045)	0.166313	0.321169	5.85452	EPHA4	EPHA4
negative regulation of cell-substrate junction organization (GO:0150118)	0.166313	0.321169	5.85452	DLC1	DLC1
negative regulation of epithelial cell differentiation (GO:0030857)	0.166313	0.321169	5.85452	DLL1	DLL1
negative regulation of focal adhesion assembly (GO:0051895)	0.166313	0.321169	5.85452	DLC1	DLC1
negative regulation of type I interferon-mediated signaling pathway (GO:0060339)	0.166313	0.321169	5.85452	ISG15	ISG15
neuron projection organization (GO:0106027)	0.166313	0.321169	5.85452	LGMN	LGMN
neutrophil activation (GO:0042119)	0.166313	0.321169	5.85452	PREX1	PREX1
nucleoside diphosphate metabolic process (GO:0009132)	0.166313	0.321169	5.85452	AK4	AK4
oligodendrocyte development (GO:0014003)	0.166313	0.321169	5.85452	CNTNAP1	CNTNAP1
platelet-derived growth factor receptor signaling pathway (GO:0048008)	0.166313	0.321169	5.85452	PDGFRA	PDGFRA
positive regulation of collagen biosynthetic process (GO:0032967)	0.166313	0.321169	5.85452	SERPINF2	SERPINF2
positive regulation of myeloid leukocyte cytokine production involved in immune response (GO:0061081)	0.166313	0.321169	5.85452	PLCG2	PLCG2
steroid biosynthetic process (GO:0006694)	0.167183	0.322502	2.79351	LSS;SLC27A2	LSS;SLC27A2
cellular response to oxidative stress (GO:0034599)	0.168255	0.323873	2.16702	PDGFRA;FOS;FOXO3	PDGFRA;FOS;FOXO3
regulation of protein secretion (GO:0050708)	0.168255	0.323873	2.16702	RSAD2;CACNA1D;APOE	RSAD2;CACNA1D;APOE
negative regulation of cell differentiation (GO:0045596)	0.170783	0.328386	1.88727	GREM1;COL5A1;ZBTB16;DLL1	GREM1;COL5A1;ZBTB16;DLL1
cell-cell junction assembly (GO:0007043)	0.171197	0.328831	2.74972	CNTNAP1;CDH11	CNTNAP1;CDH11
regulation of epidermal growth factor receptor signaling pathway (GO:0042058)	0.175227	0.329446	2.70728	ITGA1;IFI6	ITGA1;IFI6
regulation of viral genome replication (GO:0045069)	0.175227	0.329446	2.70728	RSAD2;ISG15	RSAD2;ISG15
regulation of cholesterol biosynthetic process (GO:0045540)	0.175741	0.329446	5.48833	APOE	APOE
cellular modified amino acid catabolic process (GO:0042219)	0.175741	0.329446	5.48833	ALDH4A1	ALDH4A1
regulation of establishment of endothelial barrier (GO:1903140)	0.175741	0.329446	5.48833	VEGFA	VEGFA
regulation of leukocyte migration (GO:0002685)	0.175741	0.329446	5.48833	VEGFA	VEGFA
regulation of neuroblast proliferation (GO:1902692)	0.175741	0.329446	5.48833	VEGFA	VEGFA
diol biosynthetic process (GO:0034312)	0.175741	0.329446	5.48833	SPTLC3	SPTLC3
regulation of NLRP3 inflammasome complex assembly (GO:1900225)	0.175741	0.329446	5.48833	NLRC3	NLRC3
reverse cholesterol transport (GO:0043691)	0.175741	0.329446	5.48833	APOE	APOE
ruffle organization (GO:0031529)	0.175741	0.329446	5.48833	CCL21	CCL21
stabilization of membrane potential (GO:0030322)	0.175741	0.329446	5.48833	KCNK3	KCNK3
vasculature development (GO:0001944)	0.175741	0.329446	5.48833	PDGFRA	PDGFRA
modified amino acid transport (GO:0072337)	0.175741	0.329446	5.48833	SLC16A12	SLC16A12
monosaccharide transmembrane transport (GO:0015749)	0.175741	0.329446	5.48833	SLC2A10	SLC2A10
negative regulation of amyloid-beta formation (GO:1902430)	0.175741	0.329446	5.48833	APOE	APOE
negative regulation of interleukin-10 production (GO:0032693)	0.175741	0.329446	5.48833	DLL1	DLL1
positive regulation of blood coagulation (GO:0030194)	0.175741	0.329446	5.48833	SERPINF2	SERPINF2
positive regulation of collagen metabolic process (GO:0010714)	0.175741	0.329446	5.48833	SERPINF2	SERPINF2
positive regulation of macrophage activation (GO:0043032)	0.175741	0.329446	5.48833	LBP	LBP
positive regulation of positive chemotaxis (GO:0050927)	0.175741	0.329446	5.48833	VEGFA	VEGFA
positive regulation of regulated secretory pathway (GO:1903307)	0.175741	0.329446	5.48833	CACNA1G	CACNA1G
positive regulation of transcription of Notch receptor target (GO:0007221)	0.175741	0.329446	5.48833	DLGAP5	DLGAP5
negative regulation of macromolecule metabolic process (GO:0010605)	0.177422	0.33225	1.85718	SLC2A10;APOE;LGMN;VEGFA	SLC2A10;APOE;LGMN;VEGFA
canonical Wnt signaling pathway (GO:0060070)	0.179272	0.334681	2.66613	FRZB;PLPP3	FRZB;PLPP3
regulation of response to external stimulus (GO:0032101)	0.182215	0.334681	2.08118	PDGFRA;AHSG;ALOX15	PDGFRA;AHSG;ALOX15
peptidyl-tyrosine phosphorylation (GO:0018108)	0.183331	0.334681	2.6262	EPHA4;PDGFRA	EPHA4;PDGFRA
positive regulation of protein polymerization (GO:0032273)	0.183331	0.334681	2.6262	CCL21;ALOX15	CCL21;ALOX15
regulation of protein phosphorylation (GO:0001932)	0.183614	0.334681	1.69146	TMEM119;CCN1;PLPP3;VEGFA;KLHL31	TMEM119;CCN1;PLPP3;VEGFA;KLHL31
cellular response to hypoxia (GO:0071456)	0.185044	0.334681	2.06481	MYC;AK4;VEGFA	MYC;AK4;VEGFA
amyloid precursor protein metabolic process (GO:0042982)	0.185063	0.334681	5.16523	APOE	APOE
regulation of adaptive immune response (GO:0002819)	0.185063	0.334681	5.16523	ALOX15	ALOX15
regulation of brown fat cell differentiation (GO:0090335)	0.185063	0.334681	5.16523	FNDC5	FNDC5
regulation of cartilage development (GO:0061035)	0.185063	0.334681	5.16523	ZBTB16	ZBTB16
regulation of catabolic process (GO:0009894)	0.185063	0.334681	5.16523	FAP	FAP
dendritic cell migration (GO:0036336)	0.185063	0.334681	5.16523	CCL21	CCL21
DNA conformation change (GO:0071103)	0.185063	0.334681	5.16523	TOP2A	TOP2A
regulation of single stranded viral RNA replication via double stranded DNA intermediate (GO:0045091)	0.185063	0.334681	5.16523	TOP2A	TOP2A
regulation of transforming growth factor beta production (GO:0071634)	0.185063	0.334681	5.16523	SERPINF2	SERPINF2
release of cytochrome c from mitochondria (GO:0001836)	0.185063	0.334681	5.16523	IFI6	IFI6
high-density lipoprotein particle remodeling (GO:0034375)	0.185063	0.334681	5.16523	APOE	APOE
long-chain fatty-acyl-CoA biosynthetic process (GO:0035338)	0.185063	0.334681	5.16523	ELOVL6	ELOVL6
triglyceride biosynthetic process (GO:0019432)	0.185063	0.334681	5.16523	LPIN1	LPIN1
negative regulation of cation transmembrane transport (GO:1904063)	0.185063	0.334681	5.16523	SLC43A2	SLC43A2
negative regulation of Rho protein signal transduction (GO:0035024)	0.185063	0.334681	5.16523	DLC1	DLC1
negative regulation of tumor necrosis factor-mediated signaling pathway (GO:0010804)	0.185063	0.334681	5.16523	PELI3	PELI3
nitric oxide mediated signal transduction (GO:0007263)	0.185063	0.334681	5.16523	APOE	APOE
positive regulation of amyloid-beta formation (GO:1902004)	0.185063	0.334681	5.16523	EPHA4	EPHA4
positive regulation of cartilage development (GO:0061036)	0.185063	0.334681	5.16523	ZBTB16	ZBTB16
positive regulation of cell adhesion mediated by integrin (GO:0033630)	0.185063	0.334681	5.16523	CCL21	CCL21
positive regulation of cell cycle phase transition (GO:1901989)	0.185063	0.334681	5.16523	PLCG2	PLCG2
positive regulation of cell migration involved in sprouting angiogenesis (GO:0090050)	0.185063	0.334681	5.16523	VEGFA	VEGFA
positive regulation of CREB transcription factor activity (GO:0032793)	0.185063	0.334681	5.16523	VEGFA	VEGFA
positive regulation of glial cell differentiation (GO:0045687)	0.185063	0.334681	5.16523	TENM4	TENM4
positive regulation of lymphocyte chemotaxis (GO:0140131)	0.185063	0.334681	5.16523	CCL21	CCL21
positive regulation of nervous system process (GO:0031646)	0.185063	0.334681	5.16523	TENM4	TENM4
positive regulation of nitric-oxide synthase activity (GO:0051000)	0.185063	0.334681	5.16523	APOE	APOE
positive regulation of phosphoprotein phosphatase activity (GO:0032516)	0.185063	0.334681	5.16523	ITGA1	ITGA1
defense response to Gram-positive bacterium (GO:0050830)	0.187404	0.337078	2.58745	LBP;PGLYRP1	LBP;PGLYRP1
fatty acid catabolic process (GO:0009062)	0.187404	0.337078	2.58745	LPIN1;SLC27A2	LPIN1;SLC27A2
negative regulation of viral process (GO:0048525)	0.187404	0.337078	2.58745	RSAD2;ISG15	RSAD2;ISG15
neutrophil chemotaxis (GO:0030593)	0.187404	0.337078	2.58745	CCL8;CCL21	CCL8;CCL21
positive regulation of cell-substrate adhesion (GO:0010811)	0.187404	0.337078	2.58745	CCL21;ALOX15	CCL21;ALOX15
positive regulation of cell migration (GO:0030335)	0.189389	0.337078	1.67198	COL1A1;PDGFRA;PLCG2;CCN1;VEGFA	COL1A1;PDGFRA;PLCG2;CCN1;VEGFA
defense response to virus (GO:0051607)	0.190736	0.337078	2.03284	RSAD2;IFI6;ISG15	RSAD2;IFI6;ISG15
regulation of macromolecule metabolic process (GO:0060255)	0.190958	0.337078	1.79978	ZNF462;MYC;APOE;AFF3	ZNF462;MYC;APOE;AFF3
Fc-gamma receptor signaling pathway involved in phagocytosis (GO:0038096)	0.191489	0.337078	2.54982	MYH2;PLCG2	MYH2;PLCG2
negative regulation of neuron apoptotic process (GO:0043524)	0.191489	0.337078	2.54982	APOE;LGMN	APOE;LGMN
negative regulation of cellular process (GO:0048523)	0.192423	0.337078	1.43091	NR4A1;DUSP1;FRZB;MYC;DLC1;ITGA1;IFI35;CCN1;DLL1	NR4A1;DUSP1;FRZB;MYC;DLC1;ITGA1;IFI35;CCN1;DLL1
actin filament capping (GO:0051693)	0.19428	0.337078	4.87802	CAPG	CAPG
activin receptor signaling pathway (GO:0032924)	0.19428	0.337078	4.87802	ACVR1C	ACVR1C
aspartate family amino acid catabolic process (GO:0009068)	0.19428	0.337078	4.87802	CRYM	CRYM
barbed-end actin filament capping (GO:0051016)	0.19428	0.337078	4.87802	CAPG	CAPG
branching involved in ureteric bud morphogenesis (GO:0001658)	0.19428	0.337078	4.87802	MYC	MYC
regulation of collagen biosynthetic process (GO:0032965)	0.19428	0.337078	4.87802	SERPINF2	SERPINF2
regulation of epithelial cell differentiation (GO:0030856)	0.19428	0.337078	4.87802	DLL1	DLL1
regulation of exosomal secretion (GO:1903541)	0.19428	0.337078	4.87802	SDC1	SDC1
detection of mechanical stimulus (GO:0050982)	0.19428	0.337078	4.87802	PIEZO2	PIEZO2
regulation of neuroinflammatory response (GO:0150077)	0.19428	0.337078	4.87802	DAGLA	DAGLA
diol metabolic process (GO:0034311)	0.19428	0.337078	4.87802	PLPP3	PLPP3
DNA alkylation (GO:0006305)	0.19428	0.337078	4.87802	FOS	FOS
DNA methylation or demethylation (GO:0044728)	0.19428	0.337078	4.87802	FOS	FOS
regulation of oligodendrocyte differentiation (GO:0048713)	0.19428	0.337078	4.87802	TENM4	TENM4
establishment or maintenance of apical/basal cell polarity (GO:0035088)	0.19428	0.337078	4.87802	CRB2	CRB2
regulation of stem cell population maintenance (GO:2000036)	0.19428	0.337078	4.87802	MYC	MYC
regulation of vascular endothelial growth factor signaling pathway (GO:1900746)	0.19428	0.337078	4.87802	DLL1	DLL1
long-term memory (GO:0007616)	0.19428	0.337078	4.87802	APOE	APOE
striated muscle cell differentiation (GO:0051146)	0.19428	0.337078	4.87802	SDC1	SDC1
synaptic transmission, cholinergic (GO:0007271)	0.19428	0.337078	4.87802	APOE	APOE
ureteric bud morphogenesis (GO:0060675)	0.19428	0.337078	4.87802	MYC	MYC
negative regulation of amyloid precursor protein catabolic process (GO:1902992)	0.19428	0.337078	4.87802	APOE	APOE
negative regulation of cytokine production involved in inflammatory response (GO:1900016)	0.19428	0.337078	4.87802	NLRC3	NLRC3
negative regulation of immune system process (GO:0002683)	0.19428	0.337078	4.87802	COL3A1	COL3A1
nucleotide-sugar biosynthetic process (GO:0009226)	0.19428	0.337078	4.87802	PMM2	PMM2
positive regulation of cellular protein catabolic process (GO:1903364)	0.19428	0.337078	4.87802	APOE	APOE
positive regulation of focal adhesion assembly (GO:0051894)	0.19428	0.337078	4.87802	VEGFA	VEGFA
positive regulation of leukocyte activation (GO:0002696)	0.19428	0.337078	4.87802	LBP	LBP
positive regulation of mitochondrial fission (GO:0090141)	0.19428	0.337078	4.87802	MCU	MCU
positive regulation of monocyte chemotaxis (GO:0090026)	0.19428	0.337078	4.87802	LGMN	LGMN
postsynaptic membrane organization (GO:0001941)	0.19428	0.337078	4.87802	APOE	APOE
generation of neurons (GO:0048699)	0.195541	0.337711	1.78142	NGRN;SPOCK1;BHLHA15;DLL1	NGRN;SPOCK1;BHLHA15;DLL1
Fc-gamma receptor signaling pathway (GO:0038094)	0.195587	0.337711	2.51327	MYH2;PLCG2	MYH2;PLCG2
negative regulation of epithelial cell proliferation (GO:0050680)	0.195587	0.337711	2.51327	NLRC3;APOE	NLRC3;APOE
negative regulation of supramolecular fiber organization (GO:1902904)	0.195587	0.337711	2.51327	APOE;CORO1A	APOE;CORO1A
positive regulation of neurogenesis (GO:0050769)	0.195587	0.337711	2.51327	SERPINF1;VEGFA	SERPINF1;VEGFA
regulation of actin filament polymerization (GO:0030833)	0.199695	0.343153	2.47774	CCL21;ALOX15	CCL21;ALOX15
regulation of actin filament-based process (GO:0032970)	0.199695	0.343153	2.47774	DLC1;CORO1A	DLC1;CORO1A
granulocyte chemotaxis (GO:0071621)	0.199695	0.343153	2.47774	CCL8;CCL21	CCL8;CCL21
negative regulation of cell adhesion (GO:0007162)	0.199695	0.343153	2.47774	DUSP1;SPOCK1	DUSP1;SPOCK1
positive regulation of JNK cascade (GO:0046330)	0.199695	0.343153	2.47774	CCL21;SERPINF2	CCL21;SERPINF2
protein-DNA complex disassembly (GO:0032986)	0.203394	0.343586	4.62105	MYC	MYC
purine ribonucleoside monophosphate metabolic process (GO:0009167)	0.203394	0.343586	4.62105	AK4	AK4
cellular modified amino acid biosynthetic process (GO:0042398)	0.203394	0.343586	4.62105	GSS	GSS
cortical actin cytoskeleton organization (GO:0030866)	0.203394	0.343586	4.62105	FHOD3	FHOD3
dopaminergic neuron differentiation (GO:0071542)	0.203394	0.343586	4.62105	VEGFA	VEGFA
embryonic digestive tract development (GO:0048566)	0.203394	0.343586	4.62105	PDGFRA	PDGFRA
fatty acid transport (GO:0015908)	0.203394	0.343586	4.62105	APOE	APOE
regulation of T cell migration (GO:2000404)	0.203394	0.343586	4.62105	CCL21	CCL21
glucose transmembrane transport (GO:1904659)	0.203394	0.343586	4.62105	SLC2A10	SLC2A10
lipopolysaccharide-mediated signaling pathway (GO:0031663)	0.203394	0.343586	4.62105	LBP	LBP
toll-like receptor 4 signaling pathway (GO:0034142)	0.203394	0.343586	4.62105	LBP	LBP
mesoderm development (GO:0007498)	0.203394	0.343586	4.62105	VEGFA	VEGFA
xenobiotic transport (GO:0042908)	0.203394	0.343586	4.62105	SLC22A3	SLC22A3
nucleobase-containing compound biosynthetic process (GO:0034654)	0.203394	0.343586	4.62105	APRT	APRT
organic cation transport (GO:0015695)	0.203394	0.343586	4.62105	SLC22A3	SLC22A3
positive regulation of activated T cell proliferation (GO:0042104)	0.203394	0.343586	4.62105	IGFBP2	IGFBP2
positive regulation of embryonic development (GO:0040019)	0.203394	0.343586	4.62105	TENM4	TENM4
positive regulation of hormone secretion (GO:0046887)	0.203394	0.343586	4.62105	SPP1	SPP1
regulation of stress fiber assembly (GO:0051492)	0.203813	0.343647	2.4432	DLC1;SERPINF2	DLC1;SERPINF2
Fc receptor mediated stimulatory signaling pathway (GO:0002431)	0.203813	0.343647	2.4432	MYH2;PLCG2	MYH2;PLCG2
positive regulation of immune response (GO:0050778)	0.207941	0.348312	2.40961	RSAD2;IFI35	RSAD2;IFI35
regulation of cellular component organization (GO:0051128)	0.208069	0.348312	1.94256	SLC2A10;SPOCK1;APOE	SLC2A10;SPOCK1;APOE
positive regulation of response to external stimulus (GO:0032103)	0.208069	0.348312	1.94256	CCL21;SERPINF2;IFI35	CCL21;SERPINF2;IFI35
enzyme linked receptor protein signaling pathway (GO:0007167)	0.210992	0.348312	1.92828	EPHA4;PDGFRA;ANGPTL1	EPHA4;PDGFRA;ANGPTL1
neuron projection morphogenesis (GO:0048812)	0.210992	0.348312	1.92828	NTNG1;CNTNAP1;DCLK1	NTNG1;CNTNAP1;DCLK1
actomyosin structure organization (GO:0031032)	0.212077	0.348312	2.37693	FHOD3;TNNT1	FHOD3;TNNT1
regulation of cell division (GO:0051302)	0.212077	0.348312	2.37693	MYC;DLL1	MYC;DLL1
positive regulation of interleukin-6 production (GO:0032755)	0.212077	0.348312	2.37693	PLCG2;LBP	PLCG2;LBP
androgen metabolic process (GO:0008209)	0.212404	0.348312	4.38978	SPP1	SPP1
regulation of cholesterol metabolic process (GO:0090181)	0.212404	0.348312	4.38978	APOE	APOE
regulation of dendritic spine development (GO:0060998)	0.212404	0.348312	4.38978	APOE	APOE
chondroitin sulfate biosynthetic process (GO:0030206)	0.212404	0.348312	4.38978	VCAN	VCAN
regulation of mitochondrial translation (GO:0070129)	0.212404	0.348312	4.38978	NGRN	NGRN
focal adhesion assembly (GO:0048041)	0.212404	0.348312	4.38978	DLC1	DLC1
regulation of ubiquitin protein ligase activity (GO:1904666)	0.212404	0.348312	4.38978	CDC20	CDC20
spindle assembly checkpoint signaling (GO:0071173)	0.212404	0.348312	4.38978	CDC20	CDC20
linoleic acid metabolic process (GO:0043651)	0.212404	0.348312	4.38978	ALOX15	ALOX15
mitochondrial calcium ion transmembrane transport (GO:0006851)	0.212404	0.348312	4.38978	MCU	MCU
mitotic spindle assembly checkpoint signaling (GO:0007094)	0.212404	0.348312	4.38978	CDC20	CDC20
mitotic spindle checkpoint signaling (GO:0071174)	0.212404	0.348312	4.38978	CDC20	CDC20
natural killer cell activation involved in immune response (GO:0002323)	0.212404	0.348312	4.38978	CORO1A	CORO1A
negative regulation of protein localization to cell periphery (GO:1904376)	0.212404	0.348312	4.38978	SAPCD2	SAPCD2
negative regulation of response to wounding (GO:1903035)	0.212404	0.348312	4.38978	EPHA4	EPHA4
positive regulation of glycolytic process (GO:0045821)	0.212404	0.348312	4.38978	ZBTB20	ZBTB20
positive regulation of phosphatase activity (GO:0010922)	0.212404	0.348312	4.38978	ITGA1	ITGA1
positive regulation of purine nucleotide metabolic process (GO:1900544)	0.212404	0.348312	4.38978	ZBTB20	ZBTB20
positive regulation of smoothened signaling pathway (GO:0045880)	0.212404	0.348312	4.38978	EVC	EVC
positive regulation of T cell cytokine production (GO:0002726)	0.212404	0.348312	4.38978	RSAD2	RSAD2
positive regulation of transcription from RNA polymerase II promoter involved in cellular response to chemical stimulus (GO:1901522)	0.212404	0.348312	4.38978	VEGFA	VEGFA
positive regulation of vascular associated smooth muscle cell proliferation (GO:1904707)	0.212404	0.348312	4.38978	MMP2	MMP2
regulation of small GTPase mediated signal transduction (GO:0051056)	0.213925	0.350165	1.91421	PREX1;DLC1;NGEF	PREX1;DLC1;NGEF
positive regulation of cellular catabolic process (GO:0031331)	0.213925	0.350165	1.91421	ZBTB20;APOE;FOXO3	ZBTB20;APOE;FOXO3
negative regulation of developmental process (GO:0051093)	0.216222	0.352318	2.34512	GREM1;DLL1	GREM1;DLL1
neutrophil migration (GO:1990266)	0.216222	0.352318	2.34512	CCL8;CCL21	CCL8;CCL21
phosphatidylcholine metabolic process (GO:0046470)	0.216222	0.352318	2.34512	PHOSPHO1;LPIN1	PHOSPHO1;LPIN1
positive regulation of endothelial cell proliferation (GO:0001938)	0.216222	0.352318	2.34512	NR4A1;VEGFA	NR4A1;VEGFA
positive regulation of tumor necrosis factor production (GO:0032760)	0.216222	0.352318	2.34512	PLCG2;LBP	PLCG2;LBP
chromatin organization (GO:0006325)	0.216866	0.352726	1.90035	MYC;BAZ1A;PADI1	MYC;BAZ1A;PADI1
protein localization to organelle (GO:0033365)	0.216866	0.352726	1.90035	COL1A1;OTOF;ISG15	COL1A1;OTOF;ISG15
negative regulation of inflammatory response (GO:0050728)	0.218944	0.353865	1.69491	PLCG2;NLRC3;APOE;SMPDL3B	PLCG2;NLRC3;APOE;SMPDL3B
receptor-mediated endocytosis (GO:0006898)	0.219815	0.353865	1.88668	MASP1;APOE;DLL1	MASP1;APOE;DLL1
negative regulation of protein serine/threonine kinase activity (GO:0071901)	0.220374	0.353865	2.31414	DUSP1;APOE	DUSP1;APOE
regulation of adenylate cyclase activity (GO:0045761)	0.221314	0.353865	4.18053	CACNA1D	CACNA1D
regulation of cardiac muscle cell membrane repolarization (GO:0099623)	0.221314	0.353865	4.18053	CACNA1D	CACNA1D
regulation of chromosome organization (GO:0033044)	0.221314	0.353865	4.18053	MYC	MYC
cell projection assembly (GO:0030031)	0.221314	0.353865	4.18053	CAPG	CAPG
female gonad development (GO:0008585)	0.221314	0.353865	4.18053	VEGFA	VEGFA
membrane lipid metabolic process (GO:0006643)	0.221314	0.353865	4.18053	SMPDL3B	SMPDL3B
mitochondrial calcium ion homeostasis (GO:0051560)	0.221314	0.353865	4.18053	MCU	MCU
natural killer cell mediated cytotoxicity (GO:0042267)	0.221314	0.353865	4.18053	CORO1A	CORO1A
negative regulation of B cell activation (GO:0050869)	0.221314	0.353865	4.18053	TNFRSF13B	TNFRSF13B
negative regulation of mitotic metaphase/anaphase transition (GO:0045841)	0.221314	0.353865	4.18053	CDC20	CDC20
negative regulation of myeloid cell differentiation (GO:0045638)	0.221314	0.353865	4.18053	ZBTB16	ZBTB16
neuronal action potential (GO:0019228)	0.221314	0.353865	4.18053	CACNA1G	CACNA1G
positive regulation of amyloid precursor protein catabolic process (GO:1902993)	0.221314	0.353865	4.18053	EPHA4	EPHA4
positive regulation of axon extension (GO:0045773)	0.221314	0.353865	4.18053	VEGFA	VEGFA
positive regulation of dendritic spine development (GO:0060999)	0.221314	0.353865	4.18053	APOE	APOE
positive regulation of neural precursor cell proliferation (GO:2000179)	0.221314	0.353865	4.18053	VEGFA	VEGFA
negative regulation of multicellular organismal process (GO:0051241)	0.223714	0.356749	1.67859	ACVR1C;TNNT1;TIMP1;SOST	ACVR1C;TNNT1;TIMP1;SOST
positive regulation of GTPase activity (GO:0043547)	0.223714	0.356749	1.67859	TBC1D8B;CCL8;CCL21;NGEF	TBC1D8B;CCL8;CCL21;NGEF
positive regulation of protein modification process (GO:0031401)	0.223714	0.356749	1.67859	DLC1;TMEM119;CCN1;VEGFA	DLC1;TMEM119;CCN1;VEGFA
regulation of neuron differentiation (GO:0045664)	0.224532	0.357736	2.28397	TCF4;DLL1	TCF4;DLL1
regulation of fat cell differentiation (GO:0045598)	0.228697	0.360559	2.25458	FRZB;ZBTB16	FRZB;ZBTB16
regulation of NIK/NF-kappaB signaling (GO:1901222)	0.228697	0.360559	2.25458	NLRC3;IFI35	NLRC3;IFI35
response to interferon-gamma (GO:0034341)	0.228697	0.360559	2.25458	CCL8;CCL21	CCL8;CCL21
negative regulation of cell cycle (GO:0045786)	0.228697	0.360559	2.25458	NR4A1;DUSP1	NR4A1;DUSP1
negative regulation of cellular response to growth factor stimulus (GO:0090288)	0.228697	0.360559	2.25458	GREM1;SOST	GREM1;SOST
negative regulation of extrinsic apoptotic signaling pathway (GO:2001237)	0.228697	0.360559	2.25458	PELI3;IFI6	PELI3;IFI6
acylglycerol biosynthetic process (GO:0046463)	0.230122	0.360559	3.9903	LPIN1	LPIN1
cilium-dependent cell motility (GO:0060285)	0.230122	0.360559	3.9903	DNAH1	DNAH1
diacylglycerol metabolic process (GO:0046339)	0.230122	0.360559	3.9903	DAGLA	DAGLA
DNA methylation (GO:0006306)	0.230122	0.360559	3.9903	FOS	FOS
ERK1 and ERK2 cascade (GO:0070371)	0.230122	0.360559	3.9903	MYC	MYC
regulation of SMAD protein signal transduction (GO:0060390)	0.230122	0.360559	3.9903	SLC2A10	SLC2A10
regulation of steroid metabolic process (GO:0019218)	0.230122	0.360559	3.9903	APOE	APOE
hexose transmembrane transport (GO:0008645)	0.230122	0.360559	3.9903	SLC2A10	SLC2A10
negative regulation of extrinsic apoptotic signaling pathway in absence of ligand (GO:2001240)	0.230122	0.360559	3.9903	IFI6	IFI6
negative regulation of signal transduction in absence of ligand (GO:1901099)	0.230122	0.360559	3.9903	IFI6	IFI6
nucleotide metabolic process (GO:0009117)	0.230122	0.360559	3.9903	AK4	AK4
positive regulation of cholesterol efflux (GO:0010875)	0.230122	0.360559	3.9903	APOE	APOE
positive regulation of morphogenesis of an epithelium (GO:1905332)	0.230122	0.360559	3.9903	VEGFA	VEGFA
negative regulation of protein modification process (GO:0031400)	0.232866	0.364222	2.22593	PLPP3;KLHL31	PLPP3;KLHL31
positive regulation of tumor necrosis factor superfamily cytokine production (GO:1903557)	0.232866	0.364222	2.22593	PLCG2;LBP	PLCG2;LBP
positive regulation of cytoskeleton organization (GO:0051495)	0.237041	0.366209	2.19799	CCL21;ALOX15	CCL21;ALOX15
regulation of axon extension involved in axon guidance (GO:0048841)	0.238832	0.366209	3.81662	VEGFA	VEGFA
cardiac muscle cell differentiation (GO:0055007)	0.238832	0.366209	3.81662	VEGFA	VEGFA
cholesterol efflux (GO:0033344)	0.238832	0.366209	3.81662	APOE	APOE
defense response to fungus (GO:0050832)	0.238832	0.366209	3.81662	PLCG2	PLCG2
dorsal/ventral pattern formation (GO:0009953)	0.238832	0.366209	3.81662	GREM1	GREM1
establishment of mitotic spindle orientation (GO:0000132)	0.238832	0.366209	3.81662	SAPCD2	SAPCD2
extracellular matrix assembly (GO:0085029)	0.238832	0.366209	3.81662	NTNG1	NTNG1
response to gamma radiation (GO:0010332)	0.238832	0.366209	3.81662	MYC	MYC
leukotriene metabolic process (GO:0006691)	0.238832	0.366209	3.81662	ALOX15	ALOX15
lipid translocation (GO:0034204)	0.238832	0.366209	3.81662	ATP11A	ATP11A
long-chain fatty-acyl-CoA metabolic process (GO:0035336)	0.238832	0.366209	3.81662	ELOVL6	ELOVL6
mammary gland development (GO:0030879)	0.238832	0.366209	3.81662	VEGFA	VEGFA
negative regulation of neuron differentiation (GO:0045665)	0.238832	0.366209	3.81662	DLL1	DLL1
negative regulation of stress fiber assembly (GO:0051497)	0.238832	0.366209	3.81662	DLC1	DLC1
positive regulation of carbohydrate metabolic process (GO:0045913)	0.238832	0.366209	3.81662	ZBTB20	ZBTB20
positive regulation of cell-substrate junction organization (GO:0150117)	0.238832	0.366209	3.81662	VEGFA	VEGFA
positive regulation of cellular response to transforming growth factor beta stimulus (GO:1903846)	0.238832	0.366209	3.81662	SLC2A10	SLC2A10
positive regulation of neuron apoptotic process (GO:0043525)	0.238832	0.366209	3.81662	FOXO3	FOXO3
positive regulation of p38MAPK cascade (GO:1900745)	0.238832	0.366209	3.81662	VEGFA	VEGFA
positive regulation of phospholipase activity (GO:0010518)	0.238832	0.366209	3.81662	PDGFRA	PDGFRA
positive regulation of transcription from RNA polymerase II promoter in response to stress (GO:0036003)	0.238832	0.366209	3.81662	VEGFA	VEGFA
positive regulation of transforming growth factor beta receptor signaling pathway (GO:0030511)	0.238832	0.366209	3.81662	SLC2A10	SLC2A10
regulation of Notch signaling pathway (GO:0008593)	0.241219	0.369238	2.17075	DLL1;DLK1	DLL1;DLK1
epidermis development (GO:0008544)	0.241219	0.369238	2.17075	KRT5;DLL1	KRT5;DLL1
anaphase-promoting complex-dependent catabolic process (GO:0031145)	0.245401	0.373979	2.14416	CDC20;ECRG4	CDC20;ECRG4
negative regulation of protein phosphorylation (GO:0001933)	0.2467	0.373979	1.7719	GREM1;PLPP3;KLHL31	GREM1;PLPP3;KLHL31
acylglycerol homeostasis (GO:0055090)	0.247444	0.373979	3.65741	APOE	APOE
receptor catabolic process (GO:0032801)	0.247444	0.373979	3.65741	LGMN	LGMN
cardiac conduction system development (GO:0003161)	0.247444	0.373979	3.65741	CACNA1G	CACNA1G
regulation of epidermal cell differentiation (GO:0045604)	0.247444	0.373979	3.65741	DLL1	DLL1
cellular response to hexose stimulus (GO:0071331)	0.247444	0.373979	3.65741	ZBTB20	ZBTB20
regulation of interferon-alpha production (GO:0032647)	0.247444	0.373979	3.65741	NLRC3	NLRC3
regulation of mitochondrial fission (GO:0090140)	0.247444	0.373979	3.65741	MCU	MCU
energy derivation by oxidation of organic compounds (GO:0015980)	0.247444	0.373979	3.65741	MYC	MYC
fat-soluble vitamin metabolic process (GO:0006775)	0.247444	0.373979	3.65741	LGMN	LGMN
in utero embryonic development (GO:0001701)	0.247444	0.373979	3.65741	VEGFA	VEGFA
ventricular cardiac muscle tissue development (GO:0003229)	0.247444	0.373979	3.65741	MYH7	MYH7
negative regulation of cell junction assembly (GO:1901889)	0.247444	0.373979	3.65741	DLC1	DLC1
positive regulation of T cell migration (GO:2000406)	0.247444	0.373979	3.65741	CCL21	CCL21
regulation of I-kappaB kinase/NF-kappaB signaling (GO:0043122)	0.247948	0.374426	1.60147	PPP5C;CCL21;PLCG2;NLRC3	PPP5C;CCL21;PLCG2;NLRC3
regulation of neuron death (GO:1901214)	0.253772	0.381069	2.0929	DHCR24;FOS	DHCR24;FOS
response to interleukin-1 (GO:0070555)	0.253772	0.381069	2.0929	CCL8;CCL21	CCL8;CCL21
negative regulation of phosphorylation (GO:0042326)	0.253772	0.381069	2.0929	PLPP3;KLHL31	PLPP3;KLHL31
cellular response to interleukin-1 (GO:0071347)	0.255776	0.381069	1.73667	CCL8;CCL21;PELI3	CCL8;CCL21;PELI3
purine-containing compound biosynthetic process (GO:0072522)	0.255958	0.381069	3.51093	APRT	APRT
regulation of biomineral tissue development (GO:0070167)	0.255958	0.381069	3.51093	AHSG	AHSG
cellular response to drug (GO:0035690)	0.255958	0.381069	3.51093	MYC	MYC
clathrin-dependent endocytosis (GO:0072583)	0.255958	0.381069	3.51093	DLL1	DLL1
regulation of myelination (GO:0031641)	0.255958	0.381069	3.51093	TENM4	TENM4
regulation of potassium ion transmembrane transporter activity (GO:1901016)	0.255958	0.381069	3.51093	CACNA1D	CACNA1D
regulation of synapse organization (GO:0050807)	0.255958	0.381069	3.51093	EPHA4	EPHA4
regulation of telomere maintenance (GO:0032204)	0.255958	0.381069	3.51093	MYC	MYC
glial cell development (GO:0021782)	0.255958	0.381069	3.51093	DLL1	DLL1
mononuclear cell differentiation (GO:1903131)	0.255958	0.381069	3.51093	VEGFA	VEGFA
negative regulation of proteolysis involved in cellular protein catabolic process (GO:1903051)	0.255958	0.381069	3.51093	EPHA4	EPHA4
positive regulation of filopodium assembly (GO:0051491)	0.255958	0.381069	3.51093	CCL21	CCL21
positive regulation of interleukin-2 production (GO:0032743)	0.255958	0.381069	3.51093	PLCG2	PLCG2
sodium ion transmembrane transport (GO:0035725)	0.257961	0.383733	2.06817	SLC6A12;ASIC3	SLC6A12;ASIC3
regulation of cell differentiation (GO:0045595)	0.258812	0.384681	1.72523	GREM1;SERPINF2;DLL1	GREM1;SERPINF2;DLL1
mitotic spindle organization (GO:0007052)	0.261853	0.385917	1.71394	CDC20;KIFC1;DLGAP5	CDC20;KIFC1;DLGAP5
regulation of establishment of planar polarity (GO:0090175)	0.26215	0.385917	2.04402	SAPCD2;PRICKLE2	SAPCD2;PRICKLE2
metal ion transport (GO:0030001)	0.26215	0.385917	2.04402	CCL8;CACNA1D	CCL8;CACNA1D
negative regulation of programmed cell death (GO:0043069)	0.262412	0.385917	1.41084	GREM1;KRT18;MYC;IFI6;DHCR24;VEGFA	GREM1;KRT18;MYC;IFI6;DHCR24;VEGFA
inflammatory response (GO:0006954)	0.262755	0.385917	1.55848	CCL8;CCL21;ALOX15;FOS	CCL8;CCL21;ALOX15;FOS
bile acid biosynthetic process (GO:0006699)	0.264377	0.385917	3.37573	SLC27A2	SLC27A2
camera-type eye development (GO:0043010)	0.264377	0.385917	3.37573	VEGFA	VEGFA
cellular response to cadmium ion (GO:0071276)	0.264377	0.385917	3.37573	FOS	FOS
cellular senescence (GO:0090398)	0.264377	0.385917	3.37573	ECRG4	ECRG4
chondroitin sulfate proteoglycan biosynthetic process (GO:0050650)	0.264377	0.385917	3.37573	VCAN	VCAN
dendritic spine organization (GO:0097061)	0.264377	0.385917	3.37573	LGMN	LGMN
regulation of toll-like receptor signaling pathway (GO:0034121)	0.264377	0.385917	3.37573	SMPDL3B	SMPDL3B
mitotic chromosome condensation (GO:0007076)	0.264377	0.385917	3.37573	NCAPG	NCAPG
monocarboxylic acid catabolic process (GO:0072329)	0.264377	0.385917	3.37573	LPIN1	LPIN1
negative regulation of actin filament bundle assembly (GO:0032232)	0.264377	0.385917	3.37573	DLC1	DLC1
negative regulation of catalytic activity (GO:0043086)	0.264377	0.385917	3.37573	TIMP1	TIMP1
negative regulation of insulin receptor signaling pathway (GO:0046627)	0.264377	0.385917	3.37573	AHSG	AHSG
negative regulation of plasma membrane bounded cell projection assembly (GO:0120033)	0.264377	0.385917	3.37573	CCL21	CCL21
nucleobase-containing small molecule interconversion (GO:0015949)	0.264377	0.385917	3.37573	AK4	AK4
peptide hormone secretion (GO:0030072)	0.264377	0.385917	3.37573	EXOC3L1	EXOC3L1
positive regulation of erythrocyte differentiation (GO:0045648)	0.264377	0.385917	3.37573	FOXO3	FOXO3
positive regulation of mitotic cell cycle (GO:0045931)	0.264377	0.385917	3.37573	LGMN	LGMN
regulation of endothelial cell migration (GO:0010594)	0.26634	0.387836	2.02042	APOE;VEGFA	APOE;VEGFA
positive regulation of inflammatory response (GO:0050729)	0.26634	0.387836	2.02042	IFI35;LBP	IFI35;LBP
protein import (GO:0017038)	0.26634	0.387836	2.02042	APOE;SPRN	APOE;SPRN
cellular amino acid catabolic process (GO:0009063)	0.27053	0.391067	1.99736	ALDH4A1;CRYM	ALDH4A1;CRYM
sodium ion transport (GO:0006814)	0.27053	0.391067	1.99736	SLC6A12;ASIC3	SLC6A12;ASIC3
regulation of calcineurin-NFAT signaling cascade (GO:0070884)	0.2727	0.391067	3.25053	PLCG2	PLCG2
regulation of calcium-mediated signaling (GO:0050848)	0.2727	0.391067	3.25053	PLCG2	PLCG2
cellular response to acid chemical (GO:0071229)	0.2727	0.391067	3.25053	VEGFA	VEGFA
regulation of extrinsic apoptotic signaling pathway in absence of ligand (GO:2001239)	0.2727	0.391067	3.25053	IFI6	IFI6
cytosolic calcium ion transport (GO:0060401)	0.2727	0.391067	3.25053	MCU	MCU
regulation of plasma membrane bounded cell projection organization (GO:0120035)	0.2727	0.391067	3.25053	NTNG1	NTNG1
regulation of postsynapse organization (GO:0099175)	0.2727	0.391067	3.25053	EPHA4	EPHA4
regulation of reactive oxygen species biosynthetic process (GO:1903426)	0.2727	0.391067	3.25053	PLCG2	PLCG2
regulation of small molecule metabolic process (GO:0062012)	0.2727	0.391067	3.25053	APOE	APOE
glycogen metabolic process (GO:0005977)	0.2727	0.391067	3.25053	PYGM	PYGM
response to ketone (GO:1901654)	0.2727	0.391067	3.25053	CCL21	CCL21
RNA phosphodiester bond hydrolysis (GO:0090501)	0.2727	0.391067	3.25053	NYNRIN	NYNRIN
keratan sulfate biosynthetic process (GO:0018146)	0.2727	0.391067	3.25053	FMOD	FMOD
macromolecule catabolic process (GO:0009057)	0.2727	0.391067	3.25053	LGMN	LGMN
negative regulation of cellular response to insulin stimulus (GO:1900077)	0.2727	0.391067	3.25053	AHSG	AHSG
neutral amino acid transport (GO:0015804)	0.2727	0.391067	3.25053	SLC43A2	SLC43A2
positive regulation of monooxygenase activity (GO:0032770)	0.2727	0.391067	3.25053	APOE	APOE
positive regulation of protein kinase B signaling (GO:0051897)	0.274061	0.392704	1.6702	PDGFRA;CCL21;MYORG	PDGFRA;CCL21;MYORG
regulation of peptidyl-tyrosine phosphorylation (GO:0050730)	0.278907	0.396842	1.95278	PLCG2;VEGFA	PLCG2;VEGFA
T cell activation (GO:0042110)	0.278907	0.396842	1.95278	CCL21;NLRC3	CCL21;NLRC3
positive regulation of cellular component biogenesis (GO:0044089)	0.278907	0.396842	1.95278	SDC1;VEGFA	SDC1;VEGFA
beta-catenin-TCF complex assembly (GO:1904837)	0.28093	0.396842	3.13429	MYC	MYC
regulation of DNA biosynthetic process (GO:2000278)	0.28093	0.396842	3.13429	MYC	MYC
determination of bilateral symmetry (GO:0009855)	0.28093	0.396842	3.13429	DLL1	DLL1
regulation of neuronal synaptic plasticity (GO:0048168)	0.28093	0.396842	3.13429	APOE	APOE
establishment of mitotic spindle localization (GO:0040001)	0.28093	0.396842	3.13429	SAPCD2	SAPCD2
response to cadmium ion (GO:0046686)	0.28093	0.396842	3.13429	FOS	FOS
limb development (GO:0060173)	0.28093	0.396842	3.13429	GREM1	GREM1
lipid catabolic process (GO:0016042)	0.28093	0.396842	3.13429	HSD17B14	HSD17B14
transition metal ion homeostasis (GO:0055076)	0.28093	0.396842	3.13429	HEPHL1	HEPHL1
mismatch repair (GO:0006298)	0.28093	0.396842	3.13429	TREX1	TREX1
negative regulation of myeloid leukocyte differentiation (GO:0002762)	0.28093	0.396842	3.13429	MYC	MYC
negative regulation of wound healing (GO:0061045)	0.28093	0.396842	3.13429	APOE	APOE
positive regulation of dephosphorylation (GO:0035306)	0.28093	0.396842	3.13429	DLC1	DLC1
positive regulation of leukocyte migration (GO:0002687)	0.28093	0.396842	3.13429	VEGFA	VEGFA
positive regulation of viral genome replication (GO:0045070)	0.28093	0.396842	3.13429	TOP2A	TOP2A
regulation of kinase activity (GO:0043549)	0.287278	0.40263	1.91013	EPHA4;PDGFRA	EPHA4;PDGFRA
positive regulation of epithelial cell migration (GO:0010634)	0.287278	0.40263	1.91013	PLCG2;VEGFA	PLCG2;VEGFA
alpha-amino acid catabolic process (GO:1901606)	0.289068	0.40263	3.02605	ALDH4A1	ALDH4A1
artery morphogenesis (GO:0048844)	0.289068	0.40263	3.02605	VEGFA	VEGFA
regulation of cation transmembrane transport (GO:1904062)	0.289068	0.40263	3.02605	CACNA1D	CACNA1D
cell projection organization (GO:0030030)	0.289068	0.40263	3.02605	CAPG	CAPG
chondroitin sulfate metabolic process (GO:0030204)	0.289068	0.40263	3.02605	VCAN	VCAN
regulation of macrophage activation (GO:0043030)	0.289068	0.40263	3.02605	LBP	LBP
establishment of spindle orientation (GO:0051294)	0.289068	0.40263	3.02605	SAPCD2	SAPCD2
estrogen metabolic process (GO:0008210)	0.289068	0.40263	3.02605	HSD17B14	HSD17B14
regulation of type I interferon-mediated signaling pathway (GO:0060338)	0.289068	0.40263	3.02605	ISG15	ISG15
respiratory tube development (GO:0030323)	0.289068	0.40263	3.02605	VEGFA	VEGFA
response to alcohol (GO:0097305)	0.289068	0.40263	3.02605	CCL21	CCL21
Golgi to plasma membrane protein transport (GO:0043001)	0.289068	0.40263	3.02605	KRT18	KRT18
synaptic vesicle cycle (GO:0099504)	0.289068	0.40263	3.02605	OTOF	OTOF
negative regulation of cytoskeleton organization (GO:0051494)	0.289068	0.40263	3.02605	CORO1A	CORO1A
positive regulation of endopeptidase activity (GO:0010950)	0.289068	0.40263	3.02605	EPHA4	EPHA4
primary neural tube formation (GO:0014020)	0.289068	0.40263	3.02605	DLC1	DLC1
cellular protein-containing complex assembly (GO:0034622)	0.295556	0.40782	1.59878	TCF4;FMOD;DLGAP5	TCF4;FMOD;DLGAP5
cellular transition metal ion homeostasis (GO:0046916)	0.295639	0.40782	1.8693	HEPHL1;MYC	HEPHL1;MYC
aminoglycan catabolic process (GO:0006026)	0.297113	0.40782	2.92504	SDC1	SDC1
regulation of calcium ion-dependent exocytosis (GO:0017158)	0.297113	0.40782	2.92504	CACNA1G	CACNA1G
cellular nitrogen compound biosynthetic process (GO:0044271)	0.297113	0.40782	2.92504	SPTLC3	SPTLC3
regulation of potassium ion transport (GO:0043266)	0.297113	0.40782	2.92504	CACNA1D	CACNA1D
embryonic skeletal system morphogenesis (GO:0048704)	0.297113	0.40782	2.92504	PDGFRA	PDGFRA
steroid hormone biosynthetic process (GO:0120178)	0.297113	0.40782	2.92504	HSD17B14	HSD17B14
triglyceride homeostasis (GO:0070328)	0.297113	0.40782	2.92504	APOE	APOE
tube closure (GO:0060606)	0.297113	0.40782	2.92504	DLC1	DLC1
vitamin transport (GO:0051180)	0.297113	0.40782	2.92504	SLC2A10	SLC2A10
negative regulation of interleukin-6 production (GO:0032715)	0.297113	0.40782	2.92504	NLRC3	NLRC3
negative regulation of osteoblast differentiation (GO:0045668)	0.297113	0.40782	2.92504	GREM1	GREM1
negative regulation of response to biotic stimulus (GO:0002832)	0.297113	0.40782	2.92504	NLRC3	NLRC3
phospholipid translocation (GO:0045332)	0.297113	0.40782	2.92504	ATP11A	ATP11A
positive regulation of locomotion (GO:0040017)	0.297113	0.40782	2.92504	CCL21	CCL21
positive regulation of mononuclear cell migration (GO:0071677)	0.297113	0.40782	2.92504	LGMN	LGMN
positive regulation of Rho protein signal transduction (GO:0035025)	0.297113	0.40782	2.92504	COL3A1	COL3A1
positive regulation of ubiquitin-protein transferase activity (GO:0051443)	0.297113	0.40782	2.92504	CDC20	CDC20
negative regulation of neuron death (GO:1901215)	0.303985	0.413675	1.83017	APOE;LGMN	APOE;LGMN
axonemal dynein complex assembly (GO:0070286)	0.305068	0.413675	2.83054	DNAH1	DNAH1
regulation of cell migration involved in sprouting angiogenesis (GO:0090049)	0.305068	0.413675	2.83054	VEGFA	VEGFA
regulation of cell morphogenesis (GO:0022604)	0.305068	0.413675	2.83054	NTNG1	NTNG1
regulation of cellular amide metabolic process (GO:0034248)	0.305068	0.413675	2.83054	FOXO3	FOXO3
cardiac muscle tissue morphogenesis (GO:0055008)	0.305068	0.413675	2.83054	MYH7	MYH7
cellular response to glucose stimulus (GO:0071333)	0.305068	0.413675	2.83054	ZBTB20	ZBTB20
endodermal cell differentiation (GO:0035987)	0.305068	0.413675	2.83054	MMP2	MMP2
establishment or maintenance of epithelial cell apical/basal polarity (GO:0045197)	0.305068	0.413675	2.83054	CRB2	CRB2
hematopoietic progenitor cell differentiation (GO:0002244)	0.305068	0.413675	2.83054	TNFRSF13B	TNFRSF13B
superoxide metabolic process (GO:0006801)	0.305068	0.413675	2.83054	PREX1	PREX1
membrane depolarization (GO:0051899)	0.305068	0.413675	2.83054	CACNA1G	CACNA1G
metal ion export (GO:0070839)	0.305068	0.413675	2.83054	KCNT2	KCNT2
negative regulation of cell-matrix adhesion (GO:0001953)	0.305068	0.413675	2.83054	DLC1	DLC1
peptidyl-proline modification (GO:0018208)	0.305068	0.413675	2.83054	FKBP10	FKBP10
positive regulation of immune effector process (GO:0002699)	0.305068	0.413675	2.83054	LBP	LBP
organic anion transport (GO:0015711)	0.308152	0.417541	1.81121	SLC22A3;SLC2A10	SLC22A3;SLC2A10
apoptotic cell clearance (GO:0043277)	0.312933	0.420212	2.74194	ALOX15	ALOX15
apoptotic mitochondrial changes (GO:0008637)	0.312933	0.420212	2.74194	IFI6	IFI6
bile acid metabolic process (GO:0008206)	0.312933	0.420212	2.74194	SLC27A2	SLC27A2
regulation of cholesterol efflux (GO:0010874)	0.312933	0.420212	2.74194	APOE	APOE
signal transduction by p53 class mediator (GO:0072331)	0.312933	0.420212	2.74194	GREM1	GREM1
keratan sulfate metabolic process (GO:0042339)	0.312933	0.420212	2.74194	FMOD	FMOD
vasculogenesis (GO:0001570)	0.312933	0.420212	2.74194	VEGFA	VEGFA
negative chemotaxis (GO:0050919)	0.312933	0.420212	2.74194	LRTM2	LRTM2
negative regulation of JNK cascade (GO:0046329)	0.312933	0.420212	2.74194	KLHL31	KLHL31
positive regulation of ATP metabolic process (GO:1903580)	0.312933	0.420212	2.74194	ZBTB20	ZBTB20
positive regulation of cholesterol transport (GO:0032376)	0.312933	0.420212	2.74194	APOE	APOE
positive regulation of cytokine production involved in immune response (GO:0002720)	0.312933	0.420212	2.74194	PLCG2	PLCG2
cation transport (GO:0006812)	0.314064	0.421415	1.54221	SLC22A3;PIEZO2;KCNK3	SLC22A3;PIEZO2;KCNK3
epithelial cell differentiation (GO:0030855)	0.316471	0.424326	1.77444	UPK1B;VEGFA	UPK1B;VEGFA
defense response to bacterium (GO:0042742)	0.320242	0.425558	1.52422	ISG15;LBP;PGLYRP1	ISG15;LBP;PGLYRP1
regulation of cell death (GO:0010941)	0.320622	0.425558	1.75661	DHCR24;CCN1	DHCR24;CCN1
calcium-mediated signaling (GO:0019722)	0.320622	0.425558	1.75661	PLCG2;MCU	PLCG2;MCU
regulation of activated T cell proliferation (GO:0046006)	0.32071	0.425558	2.65872	IGFBP2	IGFBP2
B cell receptor signaling pathway (GO:0050853)	0.32071	0.425558	2.65872	PLCG2	PLCG2
regulation of cell adhesion mediated by integrin (GO:0033628)	0.32071	0.425558	2.65872	CCL21	CCL21
central nervous system neuron differentiation (GO:0021953)	0.32071	0.425558	2.65872	SPOCK1	SPOCK1
regulation of myoblast differentiation (GO:0045661)	0.32071	0.425558	2.65872	DLL1	DLL1
ventricular cardiac muscle tissue morphogenesis (GO:0055010)	0.32071	0.425558	2.65872	MYH7	MYH7
negative regulation of blood vessel endothelial cell migration (GO:0043537)	0.32071	0.425558	2.65872	APOE	APOE
neural tube closure (GO:0001843)	0.32071	0.425558	2.65872	DLC1	DLC1
organic cyclic compound biosynthetic process (GO:1901362)	0.32071	0.425558	2.65872	LSS	LSS
positive regulation of interleukin-12 production (GO:0032735)	0.32071	0.425558	2.65872	PLCG2	PLCG2
protein insertion into membrane (GO:0051205)	0.32071	0.425558	2.65872	OTOF	OTOF
chromatin remodeling (GO:0006338)	0.324767	0.430622	1.73913	MYC;BAZ1A	MYC;BAZ1A
regulation of mitotic cell cycle (GO:0007346)	0.326421	0.43161	1.50665	CDC20;DLGAP5;LGMN	CDC20;DLGAP5;LGMN
acylglycerol catabolic process (GO:0046464)	0.328399	0.43161	2.58039	DAGLA	DAGLA
blood vessel diameter maintenance (GO:0097746)	0.328399	0.43161	2.58039	SERPINF2	SERPINF2
cellular response to virus (GO:0098586)	0.328399	0.43161	2.58039	IFI6	IFI6
respiratory system development (GO:0060541)	0.328399	0.43161	2.58039	VEGFA	VEGFA
smoothened signaling pathway (GO:0007224)	0.328399	0.43161	2.58039	IFT27	IFT27
lung development (GO:0030324)	0.328399	0.43161	2.58039	VEGFA	VEGFA
negative regulation of epithelial cell migration (GO:0010633)	0.328399	0.43161	2.58039	APOE	APOE
negative regulation of Ras protein signal transduction (GO:0046580)	0.328399	0.43161	2.58039	DLC1	DLC1
peptidyl-tyrosine dephosphorylation (GO:0035335)	0.328399	0.43161	2.58039	DUSP1	DUSP1
positive regulation of cell cycle G1/S phase transition (GO:1902808)	0.328399	0.43161	2.58039	PLCG2	PLCG2
positive regulation of reproductive process (GO:2000243)	0.328399	0.43161	2.58039	VEGFA	VEGFA
regulation of insulin secretion (GO:0050796)	0.328905	0.431959	1.72199	CACNA1D;MCU	CACNA1D;MCU
regulation of cell cycle G1/S phase transition (GO:1902806)	0.336002	0.437119	2.50654	PLCG2	PLCG2
calcium-dependent cell-cell adhesion via plasma membrane cell adhesion molecules (GO:0016339)	0.336002	0.437119	2.50654	CDH11	CDH11
regulation of embryonic development (GO:0045995)	0.336002	0.437119	2.50654	CRB2	CRB2
cyclic-nucleotide-mediated signaling (GO:0019935)	0.336002	0.437119	2.50654	APOE	APOE
regulation of mRNA processing (GO:0050684)	0.336002	0.437119	2.50654	JMJD6	JMJD6
embryonic limb morphogenesis (GO:0030326)	0.336002	0.437119	2.50654	AFF3	AFF3
retina homeostasis (GO:0001895)	0.336002	0.437119	2.50654	CRB2	CRB2
membrane fusion (GO:0061025)	0.336002	0.437119	2.50654	OTOF	OTOF
transition metal ion transport (GO:0000041)	0.336002	0.437119	2.50654	HEPHL1	HEPHL1
negative regulation of toll-like receptor signaling pathway (GO:0034122)	0.336002	0.437119	2.50654	SMPDL3B	SMPDL3B
platelet aggregation (GO:0070527)	0.336002	0.437119	2.50654	PDGFRA	PDGFRA
positive regulation of interferon-beta production (GO:0032728)	0.336002	0.437119	2.50654	ISG15	ISG15
positive regulation of mitotic nuclear division (GO:0045840)	0.336002	0.437119	2.50654	DLGAP5	DLGAP5
cellular response to peptide hormone stimulus (GO:0071375)	0.337161	0.437675	1.6887	NR4A1;LPIN1	NR4A1;LPIN1
regulation of phosphatidylinositol 3-kinase signaling (GO:0014066)	0.337161	0.437675	1.6887	PDGFRA;NLRC3	PDGFRA;NLRC3
protein localization to nucleus (GO:0034504)	0.337161	0.437675	1.6887	COL1A1;SPRN	COL1A1;SPRN
organelle organization (GO:0006996)	0.338811	0.439498	1.27536	CNTNAP1;DIAPH3;MYC;APOE;GEM;SLC25A36	CNTNAP1;DIAPH3;MYC;APOE;GEM;SLC25A36
acyl-CoA metabolic process (GO:0006637)	0.343518	0.440824	2.43679	ACSF2	ACSF2
regulation of actin cytoskeleton reorganization (GO:2000249)	0.343518	0.440824	2.43679	PDGFRA	PDGFRA
regulation of erythrocyte differentiation (GO:0045646)	0.343518	0.440824	2.43679	FOXO3	FOXO3
centromere complex assembly (GO:0034508)	0.343518	0.440824	2.43679	DLGAP5	DLGAP5
regulation of protein autophosphorylation (GO:0031952)	0.343518	0.440824	2.43679	VEGFA	VEGFA
regulation of vascular associated smooth muscle cell proliferation (GO:1904705)	0.343518	0.440824	2.43679	MMP2	MMP2
glutamate receptor signaling pathway (GO:0007215)	0.343518	0.440824	2.43679	DAGLA	DAGLA
glutamine family amino acid metabolic process (GO:0009064)	0.343518	0.440824	2.43679	ALDH4A1	ALDH4A1
negative regulation of endothelial cell proliferation (GO:0001937)	0.343518	0.440824	2.43679	APOE	APOE
phagosome maturation (GO:0090382)	0.343518	0.440824	2.43679	CORO1A	CORO1A
positive regulation of calcium ion transport (GO:0051928)	0.343518	0.440824	2.43679	CACNA1D	CACNA1D
positive regulation of exocytosis (GO:0045921)	0.343518	0.440824	2.43679	SDC1	SDC1
positive regulation of myeloid cell differentiation (GO:0045639)	0.343518	0.440824	2.43679	FOXO3	FOXO3
positive regulation of signaling receptor activity (GO:2000273)	0.343518	0.440824	2.43679	GREM1	GREM1
protein insertion into ER membrane (GO:0045048)	0.343518	0.440824	2.43679	OTOF	OTOF
DNA replication (GO:0006260)	0.345386	0.442904	1.65667	TREX1;BAZ1A	TREX1;BAZ1A
lipid transport (GO:0006869)	0.349487	0.447162	1.6411	APOE;LBP	APOE;LBP
regulation of axon extension (GO:0030516)	0.35095	0.447162	2.37081	APOE	APOE
regulation of cell communication (GO:0010646)	0.35095	0.447162	2.37081	SCG5	SCG5
connective tissue development (GO:0061448)	0.35095	0.447162	2.37081	ZBTB16	ZBTB16
regulation of phosphoprotein phosphatase activity (GO:0043666)	0.35095	0.447162	2.37081	ITGA1	ITGA1
lysosome organization (GO:0007040)	0.35095	0.447162	2.37081	CORO1A	CORO1A
negative regulation of endothelial cell migration (GO:0010596)	0.35095	0.447162	2.37081	APOE	APOE
positive regulation of cell development (GO:0010720)	0.35095	0.447162	2.37081	SERPINF1	SERPINF1
positive regulation of insulin secretion (GO:0032024)	0.35095	0.447162	2.37081	MCU	MCU
regulation of protein kinase activity (GO:0045859)	0.353578	0.450191	1.62583	CCL21;CCN1	CCL21;CCN1
Fc-epsilon receptor signaling pathway (GO:0038095)	0.357661	0.451396	1.61083	PLCG2;FOS	PLCG2;FOS
regulation of Wnt signaling pathway (GO:0030111)	0.357661	0.451396	1.61083	FRZB;SOST	FRZB;SOST
regulation of cellular component biogenesis (GO:0044087)	0.358298	0.451396	2.3083	APOE	APOE
regulation of exit from mitosis (GO:0007096)	0.358298	0.451396	2.3083	CDC20	CDC20
cellular response to ketone (GO:1901655)	0.358298	0.451396	2.3083	SPP1	SPP1
regulation of ion transmembrane transporter activity (GO:0032412)	0.358298	0.451396	2.3083	CACNA1D	CACNA1D
regulation of nitric-oxide synthase activity (GO:0050999)	0.358298	0.451396	2.3083	APOE	APOE
DNA recombination (GO:0006310)	0.358298	0.451396	2.3083	TREX1	TREX1
regulation of protein tyrosine kinase activity (GO:0061097)	0.358298	0.451396	2.3083	EPHA4	EPHA4
regulation of receptor-mediated endocytosis (GO:0048259)	0.358298	0.451396	2.3083	CCL21	CCL21
response to peptide (GO:1901652)	0.358298	0.451396	2.3083	MMP2	MMP2
negative regulation of cellular metabolic process (GO:0031324)	0.358298	0.451396	2.3083	APOE	APOE
negative regulation of lymphocyte proliferation (GO:0050672)	0.358298	0.451396	2.3083	TNFRSF13B	TNFRSF13B
odontogenesis (GO:0042476)	0.358298	0.451396	2.3083	COL1A2	COL1A2
phospholipid dephosphorylation (GO:0046839)	0.358298	0.451396	2.3083	PLPP3	PLPP3
regulation of cytoskeleton organization (GO:0051493)	0.361735	0.455086	1.5961	DLC1;CORO1A	DLC1;CORO1A
Fc receptor signaling pathway (GO:0038093)	0.361735	0.455086	1.5961	PLCG2;FOS	PLCG2;FOS
intraciliary transport involved in cilium assembly (GO:0035735)	0.365564	0.458296	2.249	IFT27	IFT27
synaptic vesicle exocytosis (GO:0016079)	0.365564	0.458296	2.249	OTOF	OTOF
negative regulation of cell-substrate adhesion (GO:0010812)	0.365564	0.458296	2.249	SPOCK1	SPOCK1
negative regulation of I-kappaB kinase/NF-kappaB signaling (GO:0043124)	0.365564	0.458296	2.249	NLRC3	NLRC3
positive regulation of wound healing (GO:0090303)	0.365564	0.458296	2.249	PLPP3	PLPP3
acylglycerol metabolic process (GO:0006639)	0.372747	0.464059	2.19267	APOE	APOE
regulation of cell development (GO:0060284)	0.372747	0.464059	2.19267	DLL1	DLL1
regulation of filopodium assembly (GO:0051489)	0.372747	0.464059	2.19267	CCL21	CCL21
cortical cytoskeleton organization (GO:0030865)	0.372747	0.464059	2.19267	FHOD3	FHOD3
regulation of mitochondrial membrane potential (GO:0051881)	0.372747	0.464059	2.19267	SLC25A36	SLC25A36
regulation of protein dephosphorylation (GO:0035304)	0.372747	0.464059	2.19267	DLC1	DLC1
epithelial cell migration (GO:0010631)	0.372747	0.464059	2.19267	FAP	FAP
regulation of response to DNA damage stimulus (GO:2001020)	0.372747	0.464059	2.19267	MYC	MYC
hexose metabolic process (GO:0019318)	0.372747	0.464059	2.19267	PMM2	PMM2
negative regulation of cell-cell adhesion (GO:0022408)	0.372747	0.464059	2.19267	VEGFA	VEGFA
ion transport (GO:0006811)	0.37793	0.469642	1.53979	PIEZO2;SLC15A3	PIEZO2;SLC15A3
positive regulation of angiogenesis (GO:0045766)	0.37793	0.469642	1.53979	DLL1;VEGFA	DLL1;VEGFA
ceramide biosynthetic process (GO:0046513)	0.37985	0.469642	2.13908	SPTLC3	SPTLC3
determination of left/right symmetry (GO:0007368)	0.37985	0.469642	2.13908	DLL1	DLL1
skeletal system morphogenesis (GO:0048705)	0.37985	0.469642	2.13908	PDGFRA	PDGFRA
translesion synthesis (GO:0019985)	0.37985	0.469642	2.13908	ISG15	ISG15
mitochondrial gene expression (GO:0140053)	0.37985	0.469642	2.13908	FOXO3	FOXO3
negative regulation of protein catabolic process (GO:0042177)	0.37985	0.469642	2.13908	TIMP1	TIMP1
nucleic acid-templated transcription (GO:0097659)	0.37985	0.469642	2.13908	PPP5C	PPP5C
positive regulation of protein tyrosine kinase activity (GO:0061098)	0.37985	0.469642	2.13908	EPHA4	EPHA4
anion transport (GO:0006820)	0.386872	0.475051	2.08804	SLC22A3	SLC22A3
regulation of cytokine production involved in inflammatory response (GO:1900015)	0.386872	0.475051	2.08804	NLRC3	NLRC3
cellular glucose homeostasis (GO:0001678)	0.386872	0.475051	2.08804	ZBTB20	ZBTB20
DNA synthesis involved in DNA repair (GO:0000731)	0.386872	0.475051	2.08804	ISG15	ISG15
glutathione metabolic process (GO:0006749)	0.386872	0.475051	2.08804	GSS	GSS
heart looping (GO:0001947)	0.386872	0.475051	2.08804	DLL1	DLL1
signal release from synapse (GO:0099643)	0.386872	0.475051	2.08804	OTOF	OTOF
positive regulation of neuron differentiation (GO:0045666)	0.386872	0.475051	2.08804	TCF4	TCF4
positive regulation of peptide hormone secretion (GO:0090277)	0.386872	0.475051	2.08804	MCU	MCU
positive regulation of phospholipase C activity (GO:0010863)	0.386872	0.475051	2.08804	PDGFRA	PDGFRA
negative regulation of intracellular signal transduction (GO:1902532)	0.387956	0.476055	1.35074	DUSP1;NLRC3;IFI35	DUSP1;NLRC3;IFI35
cardiac ventricle morphogenesis (GO:0003208)	0.393816	0.480943	2.03938	MYH7	MYH7
embryonic organ morphogenesis (GO:0048562)	0.393816	0.480943	2.03938	PDGFRA	PDGFRA
mitotic spindle assembly (GO:0090307)	0.393816	0.480943	2.03938	KIFC1	KIFC1
negative regulation of epidermal growth factor receptor signaling pathway (GO:0042059)	0.393816	0.480943	2.03938	ITGA1	ITGA1
neurotransmitter secretion (GO:0007269)	0.393816	0.480943	2.03938	OTOF	OTOF
positive regulation of stress fiber assembly (GO:0051496)	0.393816	0.480943	2.03938	SERPINF2	SERPINF2
protein K63-linked ubiquitination (GO:0070534)	0.393816	0.480943	2.03938	PELI3	PELI3
modification-dependent protein catabolic process (GO:0019941)	0.397095	0.484618	1.33007	CDC20;RNF213;ISG15	CDC20;RNF213;ISG15
cellular response to interferon-gamma (GO:0071346)	0.39793	0.484977	1.47471	CCL8;CCL21	CCL8;CCL21
protein homooligomerization (GO:0051260)	0.39793	0.484977	1.47471	RNF213;JMJD6	RNF213;JMJD6
action potential (GO:0001508)	0.400681	0.486676	1.99293	CACNA1G	CACNA1G
zymogen activation (GO:0031638)	0.400681	0.486676	1.99293	LGMN	LGMN
positive regulation of nervous system development (GO:0051962)	0.400681	0.486676	1.99293	SERPINF1	SERPINF1
positive regulation of Notch signaling pathway (GO:0045747)	0.400681	0.486676	1.99293	DLL1	DLL1
positive regulation of response to biotic stimulus (GO:0002833)	0.400681	0.486676	1.99293	IFI35	IFI35
axon guidance (GO:0007411)	0.403168	0.489366	1.31664	EPHA4;LRTM2;VEGFA	EPHA4;LRTM2;VEGFA
cellular response to organic substance (GO:0071310)	0.405847	0.491923	1.45019	ACVR1C;PTPN4	ACVR1C;PTPN4
alpha-amino acid metabolic process (GO:1901605)	0.407468	0.491923	1.94854	GPT2	GPT2
regulation of B cell proliferation (GO:0030888)	0.407468	0.491923	1.94854	TNFRSF13B	TNFRSF13B
regulation of DNA metabolic process (GO:0051052)	0.407468	0.491923	1.94854	MYC	MYC
erythrocyte differentiation (GO:0030218)	0.407468	0.491923	1.94854	VEGFA	VEGFA
vesicle organization (GO:0016050)	0.407468	0.491923	1.94854	CORO1A	CORO1A
postreplication repair (GO:0006301)	0.407468	0.491923	1.94854	ISG15	ISG15
posttranscriptional regulation of gene expression (GO:0010608)	0.407468	0.491923	1.94854	FOXO3	FOXO3
positive regulation of protein phosphorylation (GO:0001934)	0.409213	0.493698	1.19971	CCL21;PLCG2;TMEM119;CCN1;VEGFA	CCL21;PLCG2;TMEM119;CCN1;VEGFA
non-canonical Wnt signaling pathway (GO:0035567)	0.409787	0.494058	1.43823	FRZB;PRICKLE2	FRZB;PRICKLE2
regulation of cellular metabolic process (GO:0031323)	0.414179	0.498014	1.90609	ACLY	ACLY
determination of heart left/right asymmetry (GO:0061371)	0.414179	0.498014	1.90609	DLL1	DLL1
embryonic heart tube morphogenesis (GO:0003143)	0.414179	0.498014	1.90609	DLL1	DLL1
polyol metabolic process (GO:0019751)	0.414179	0.498014	1.90609	PLCG2	PLCG2
regulation of protein kinase B signaling (GO:0051896)	0.41526	0.49898	1.29056	PDGFRA;CCL21;MYORG	PDGFRA;CCL21;MYORG
circulatory system development (GO:0072359)	0.417629	0.501491	1.41489	CRB2;COL3A1	CRB2;COL3A1
purine ribonucleotide biosynthetic process (GO:0009152)	0.420814	0.502624	1.86544	SLC25A16	SLC25A16
regulation of interleukin-2 production (GO:0032663)	0.420814	0.502624	1.86544	PLCG2	PLCG2
cognition (GO:0050890)	0.420814	0.502624	1.86544	CBR3	CBR3
regulation of protein metabolic process (GO:0051246)	0.420814	0.502624	1.86544	APOE	APOE
inositol phosphate metabolic process (GO:0043647)	0.420814	0.502624	1.86544	PLCG2	PLCG2
substrate adhesion-dependent cell spreading (GO:0034446)	0.420814	0.502624	1.86544	NTNG1	NTNG1
myelination (GO:0042552)	0.420814	0.502624	1.86544	CNTNAP1	CNTNAP1
positive regulation of blood vessel endothelial cell migration (GO:0043536)	0.420814	0.502624	1.86544	VEGFA	VEGFA
positive regulation of intracellular signal transduction (GO:1902533)	0.421448	0.503045	1.14066	PDGFRA;PPP5C;CCL21;PLCG2;IFI35;MYORG;VEGFA	PDGFRA;PPP5C;CCL21;PLCG2;IFI35;MYORG;VEGFA
microtubule cytoskeleton organization involved in mitosis (GO:1902850)	0.425418	0.506414	1.39229	CDC20;DLGAP5	CDC20;DLGAP5
plasma membrane bounded cell projection organization (GO:0120036)	0.425418	0.506414	1.39229	CCL21;APOE	CCL21;APOE
adherens junction organization (GO:0034332)	0.427375	0.506414	1.82648	CDH11	CDH11
aminoglycan biosynthetic process (GO:0006023)	0.427375	0.506414	1.82648	SDC1	SDC1
cellular defense response (GO:0006968)	0.427375	0.506414	1.82648	LBP	LBP
cellular response to mechanical stimulus (GO:0071260)	0.427375	0.506414	1.82648	PIEZO2	PIEZO2
regulation of smooth muscle cell proliferation (GO:0048660)	0.427375	0.506414	1.82648	SERPINF2	SERPINF2
response to glucose (GO:0009749)	0.427375	0.506414	1.82648	ZBTB20	ZBTB20
secondary alcohol metabolic process (GO:1902652)	0.427375	0.506414	1.82648	APOE	APOE
mitotic cytokinesis (GO:0000281)	0.427375	0.506414	1.82648	CKAP2	CKAP2
positive regulation of reactive oxygen species metabolic process (GO:2000379)	0.427375	0.506414	1.82648	PLCG2	PLCG2
positive regulation of macromolecule biosynthetic process (GO:0010557)	0.429293	0.508351	1.38126	CCL21;MYC	CCL21;MYC
protein glycosylation (GO:0006486)	0.433153	0.512408	1.3704	PMM2;GALNT10	PMM2;GALNT10
regulation of cellular component movement (GO:0051270)	0.433862	0.512408	1.78912	VEGFA	VEGFA
iron ion transport (GO:0006826)	0.433862	0.512408	1.78912	HEPHL1	HEPHL1
positive regulation of ion transport (GO:0043270)	0.433862	0.512408	1.78912	CACNA1D	CACNA1D
regulation of axonogenesis (GO:0050770)	0.440275	0.51692	1.75324	EPHA4	EPHA4
regulation of epithelial cell migration (GO:0010632)	0.440275	0.51692	1.75324	PLCG2	PLCG2
regulation of interleukin-12 production (GO:0032655)	0.440275	0.51692	1.75324	PLCG2	PLCG2
cholesterol transport (GO:0030301)	0.440275	0.51692	1.75324	APOE	APOE
regulation of smoothened signaling pathway (GO:0008589)	0.440275	0.51692	1.75324	EVC	EVC
inositol lipid-mediated signaling (GO:0048017)	0.440275	0.51692	1.75324	PDGFRA	PDGFRA
mitotic metaphase plate congression (GO:0007080)	0.440275	0.51692	1.75324	KIFC1	KIFC1
negative regulation of protein ubiquitination (GO:0031397)	0.440275	0.51692	1.75324	ISG15	ISG15
positive regulation of actin filament bundle assembly (GO:0032233)	0.440275	0.51692	1.75324	SERPINF2	SERPINF2
regulation of transcription by RNA polymerase II (GO:0006357)	0.44081	0.51721	1.04918	ZBTB20;AEBP1;FOXO3;DLL1;HMGB4;MYC;MYBL2;APOE;CCN1;CRYM;JUNB;ZNF462;ZBTB16;SERPINF2;CKAP2;EBF2;BHLHA15;FOS;BAZ1A;JMJD6;VEGFA;GREM1;NR4A1;TCF4;ZNF699;LPIN1	ZBTB20;AEBP1;FOXO3;DLL1;HMGB4;MYC;MYBL2;APOE;CCN1;CRYM;JUNB;ZNF462;ZBTB16;SERPINF2;CKAP2;EBF2;BHLHA15;FOS;BAZ1A;JMJD6;VEGFA;GREM1;NR4A1;TCF4;ZNF699;LPIN1
amide biosynthetic process (GO:0043604)	0.446616	0.521634	1.71878	SPTLC3	SPTLC3
cartilage development (GO:0051216)	0.446616	0.521634	1.71878	ZBTB16	ZBTB16
cilium movement (GO:0003341)	0.446616	0.521634	1.71878	DNAH1	DNAH1
fatty acid beta-oxidation (GO:0006635)	0.446616	0.521634	1.71878	SLC27A2	SLC27A2
myeloid cell differentiation (GO:0030099)	0.446616	0.521634	1.71878	ZBTB16	ZBTB16
negative regulation of protein metabolic process (GO:0051248)	0.446616	0.521634	1.71878	APOE	APOE
positive regulation of developmental growth (GO:0048639)	0.446616	0.521634	1.71878	DLL1	DLL1
cardiac muscle tissue development (GO:0048738)	0.452886	0.527925	1.68564	CACNA1G	CACNA1G
positive regulation of NIK/NF-kappaB signaling (GO:1901224)	0.452886	0.527925	1.68564	IFI35	IFI35
positive regulation of phagocytosis (GO:0050766)	0.452886	0.527925	1.68564	AHSG	AHSG
cellular calcium ion homeostasis (GO:0006874)	0.456018	0.531232	1.30864	CCL8;MCU	CCL8;MCU
regulation of potassium ion transmembrane transport (GO:1901379)	0.459084	0.533764	1.65375	CACNA1D	CACNA1D
regulation of proteasomal protein catabolic process (GO:0061136)	0.459084	0.533764	1.65375	APOE	APOE
glycosaminoglycan metabolic process (GO:0030203)	0.459084	0.533764	1.65375	SDC1	SDC1
neutrophil degranulation (GO:0043312)	0.461277	0.535965	1.10808	ACLY;AHSG;ATP11A;PGLYRP1;SLC27A2;APRT	ACLY;AHSG;ATP11A;PGLYRP1;SLC27A2;APRT
positive regulation of gene expression (GO:0010628)	0.463259	0.537921	1.10569	ACTA1;SLC2A10;MYC;PLCG2;TMEM119;VEGFA	ACTA1;SLC2A10;MYC;PLCG2;TMEM119;VEGFA
negative regulation of protein modification by small protein conjugation or removal (GO:1903321)	0.465213	0.539491	1.62305	ISG15	ISG15
positive regulation of response to DNA damage stimulus (GO:2001022)	0.465213	0.539491	1.62305	MYC	MYC
potassium ion transmembrane transport (GO:0071805)	0.467251	0.541505	1.27978	KCNT2;KCNK3	KCNT2;KCNK3
neutrophil activation involved in immune response (GO:0002283)	0.469196	0.543407	1.0986	ACLY;AHSG;ATP11A;PGLYRP1;SLC27A2;APRT	ACLY;AHSG;ATP11A;PGLYRP1;SLC27A2;APRT
protein-containing complex disassembly (GO:0032984)	0.471273	0.544407	1.59345	MYC	MYC
regulation of ATP metabolic process (GO:1903578)	0.471273	0.544407	1.59345	AK4	AK4
Rho protein signal transduction (GO:0007266)	0.471273	0.544407	1.59345	COL1A2	COL1A2
mitochondrial transport (GO:0006839)	0.471273	0.544407	1.59345	SLC25A16	SLC25A16
neutrophil mediated immunity (GO:0002446)	0.475115	0.548492	1.09159	ACLY;AHSG;ATP11A;PGLYRP1;SLC27A2;APRT	ACLY;AHSG;ATP11A;PGLYRP1;SLC27A2;APRT
regulation of mitotic nuclear division (GO:0007088)	0.477264	0.549559	1.56492	DUSP1	DUSP1
positive regulation of cell junction assembly (GO:1901890)	0.477264	0.549559	1.56492	VEGFA	VEGFA
positive regulation of interferon-gamma production (GO:0032729)	0.477264	0.549559	1.56492	ISG15	ISG15
positive regulation of proteolysis (GO:0045862)	0.477264	0.549559	1.56492	APOE	APOE
monocarboxylic acid metabolic process (GO:0032787)	0.482014	0.551776	1.24322	ALDH4A1;ACSF2	ALDH4A1;ACSF2
neuron development (GO:0048666)	0.482014	0.551776	1.24322	TENM4;APOE	TENM4;APOE
receptor metabolic process (GO:0043112)	0.483188	0.551776	1.53739	LGMN	LGMN
regulation of calcium ion transport (GO:0051924)	0.483188	0.551776	1.53739	CACNA1D	CACNA1D
regulation of pathway-restricted SMAD protein phosphorylation (GO:0060393)	0.483188	0.551776	1.53739	GREM1	GREM1
regulation of phagocytosis (GO:0050764)	0.483188	0.551776	1.53739	AHSG	AHSG
eye development (GO:0001654)	0.483188	0.551776	1.53739	COL5A1	COL5A1
fat cell differentiation (GO:0045444)	0.483188	0.551776	1.53739	NR4A1	NR4A1
regulation of tumor necrosis factor-mediated signaling pathway (GO:0010803)	0.483188	0.551776	1.53739	PELI3	PELI3
RNA modification (GO:0009451)	0.483188	0.551776	1.53739	JMJD6	JMJD6
positive regulation of mitochondrion organization (GO:0010822)	0.483188	0.551776	1.53739	MCU	MCU
positive regulation of mitotic cell cycle phase transition (GO:1901992)	0.483188	0.551776	1.53739	DLGAP5	DLGAP5
positive regulation of protein binding (GO:0032092)	0.483188	0.551776	1.53739	APOE	APOE
regulation of secretion by cell (GO:1903530)	0.489045	0.557754	1.5108	SCG5	SCG5
positive regulation of tyrosine phosphorylation of STAT protein (GO:0042531)	0.489045	0.557754	1.5108	VEGFA	VEGFA
negative regulation of gene expression (GO:0010629)	0.494804	0.563642	1.10239	SLC2A10;APOE;LGMN;VEGFA	SLC2A10;APOE;LGMN;VEGFA
response to organic cyclic compound (GO:0014070)	0.494836	0.563642	1.48512	SPP1	SPP1
B cell differentiation (GO:0030183)	0.500561	0.568719	1.4603	PLCG2	PLCG2
negative regulation of response to stimulus (GO:0048585)	0.500561	0.568719	1.4603	COL3A1	COL3A1
O-glycan processing (GO:0016266)	0.500561	0.568719	1.4603	GALNT10	GALNT10
positive regulation of interleukin-8 production (GO:0032757)	0.500561	0.568719	1.4603	LBP	LBP
positive regulation of hydrolase activity (GO:0051345)	0.50368	0.5719	1.19212	CCL8;CCL21	CCL8;CCL21
I-kappaB kinase/NF-kappaB signaling (GO:0007249)	0.506222	0.574423	1.43628	NLRC3	NLRC3
regulation of cytokine production (GO:0001817)	0.507234	0.575207	1.184	TREX1;ISG15	TREX1;ISG15
axonogenesis (GO:0007409)	0.511337	0.578578	1.10899	NTNG1;EPHA4;LRTM2	NTNG1;EPHA4;LRTM2
cellular protein localization (GO:0034613)	0.511608	0.578578	1.07825	TBC1D8B;CNTNAP1;SCG5;IFT27	TBC1D8B;CNTNAP1;SCG5;IFT27
cell cycle G1/S phase transition (GO:0044843)	0.511819	0.578578	1.41305	MYC	MYC
positive regulation of DNA metabolic process (GO:0051054)	0.511819	0.578578	1.41305	MYC	MYC
positive regulation of Ras protein signal transduction (GO:0046579)	0.511819	0.578578	1.41305	COL3A1	COL3A1
antimicrobial humoral immune response mediated by antimicrobial peptide (GO:0061844)	0.517353	0.583731	1.39055	PGLYRP1	PGLYRP1
regulation of extrinsic apoptotic signaling pathway (GO:2001236)	0.517353	0.583731	1.39055	PELI3	PELI3
protein catabolic process (GO:0030163)	0.517353	0.583731	1.39055	APOE	APOE
regulation of cell-matrix adhesion (GO:0001952)	0.522825	0.588793	1.36875	CCL21	CCL21
chemical homeostasis (GO:0048878)	0.522825	0.588793	1.36875	ZBTB20	ZBTB20
protein autoubiquitination (GO:0051865)	0.522825	0.588793	1.36875	RNF213	RNF213
positive regulation of cytokine production (GO:0001819)	0.525809	0.591783	1.05838	SERPINF2;PLCG2;ISG15;LBP	SERPINF2;PLCG2;ISG15;LBP
positive regulation of DNA-binding transcription factor activity (GO:0051091)	0.527926	0.592653	1.08127	PLCG2;PLPP3;VEGFA	PLCG2;PLPP3;VEGFA
intracellular protein transport (GO:0006886)	0.528157	0.592653	1.05514	TBC1D8B;SCG5;IFT27;SPRN	TBC1D8B;SCG5;IFT27;SPRN
positive regulation of cell cycle (GO:0045787)	0.528234	0.592653	1.34762	LGMN	LGMN
positive regulation of cell death (GO:0010942)	0.528234	0.592653	1.34762	FOS	FOS
positive regulation of T cell proliferation (GO:0042102)	0.528234	0.592653	1.34762	IGFBP2	IGFBP2
protein N-linked glycosylation (GO:0006487)	0.533583	0.597533	1.32714	PMM2	PMM2
anion transmembrane transport (GO:0098656)	0.533583	0.597533	1.32714	SLC16A12	SLC16A12
vascular endothelial growth factor receptor signaling pathway (GO:0048010)	0.533583	0.597533	1.32714	VEGFA	VEGFA
cellular response to starvation (GO:0009267)	0.535066	0.59882	1.12283	BHLHA15;FOXO3	BHLHA15;FOXO3
protein autophosphorylation (GO:0046777)	0.538468	0.601577	1.11562	EPHA4;PDGFRA	EPHA4;PDGFRA
regulation of myeloid cell differentiation (GO:0045637)	0.538871	0.601577	1.30726	ZBTB16	ZBTB16
regulation of tyrosine phosphorylation of STAT protein (GO:0042509)	0.538871	0.601577	1.30726	VEGFA	VEGFA
negative regulation of transforming growth factor beta receptor signaling pathway (GO:0030512)	0.538871	0.601577	1.30726	SLC2A10	SLC2A10
negative regulation of cellular catabolic process (GO:0031330)	0.5441	0.606395	1.28797	TIMP1	TIMP1
positive regulation of MAP kinase activity (GO:0043406)	0.5441	0.606395	1.28797	VEGFA	VEGFA
positive regulation of signal transduction (GO:0009967)	0.544201	0.606395	1.05489	EVC;DLL1;MYORG	EVC;DLL1;MYORG
carbohydrate homeostasis (GO:0033500)	0.549269	0.610904	1.26924	MCU	MCU
cellular response to light stimulus (GO:0071482)	0.549269	0.610904	1.26924	MYC	MYC
sterol metabolic process (GO:0016125)	0.549269	0.610904	1.26924	APOE	APOE
regulation of intracellular signal transduction (GO:1902531)	0.551355	0.612845	1.01297	PREX1;DLC1;PLCG2;NGEF;VEGFA	PREX1;DLC1;PLCG2;NGEF;VEGFA
regulation of glycolytic process (GO:0006110)	0.55438	0.613925	1.25105	ZBTB20	ZBTB20
cholesterol homeostasis (GO:0042632)	0.55438	0.613925	1.25105	APOE	APOE
response to metal ion (GO:0010038)	0.55438	0.613925	1.25105	PPP5C	PPP5C
myeloid leukocyte differentiation (GO:0002573)	0.55438	0.613925	1.25105	VEGFA	VEGFA
nucleic acid metabolic process (GO:0090304)	0.55438	0.613925	1.25105	TREX1	TREX1
phosphatidylinositol-mediated signaling (GO:0048015)	0.55438	0.613925	1.25105	PDGFRA	PDGFRA
adenylate cyclase-modulating G protein-coupled receptor signaling pathway (GO:0007188)	0.558524	0.617235	1.07422	ADGRD1;CACNA1D	ADGRD1;CACNA1D
cell morphogenesis involved in differentiation (GO:0000904)	0.559434	0.617235	1.23336	NTNG1	NTNG1
cytoskeleton-dependent cytokinesis (GO:0061640)	0.559434	0.617235	1.23336	CKAP2	CKAP2
response to ionizing radiation (GO:0010212)	0.559434	0.617235	1.23336	MYC	MYC
sterol homeostasis (GO:0055092)	0.559434	0.617235	1.23336	APOE	APOE
positive regulation of protein secretion (GO:0050714)	0.559434	0.617235	1.23336	MCU	MCU
cellular response to DNA damage stimulus (GO:0006974)	0.560417	0.617939	1.01172	TOP2A;UBA7;MYC;TREX1	TOP2A;UBA7;MYC;TREX1
defense response to Gram-negative bacterium (GO:0050829)	0.56443	0.620458	1.21617	LBP	LBP
endoplasmic reticulum organization (GO:0007029)	0.56443	0.620458	1.21617	OTOF	OTOF
response to molecule of bacterial origin (GO:0002237)	0.56443	0.620458	1.21617	LBP	LBP
neurotransmitter transport (GO:0006836)	0.56443	0.620458	1.21617	SLC22A3	SLC22A3
positive regulation of synaptic transmission (GO:0050806)	0.56443	0.620458	1.21617	LGMN	LGMN
regulation of peptide hormone secretion (GO:0090276)	0.56937	0.625122	1.19945	CACNA1D	CACNA1D
mitotic nuclear division (GO:0140014)	0.56937	0.625122	1.19945	KIFC1	KIFC1
regulation of transcription from RNA polymerase II promoter in response to hypoxia (GO:0061418)	0.574254	0.629714	1.18318	VEGFA	VEGFA
nucleic acid phosphodiester bond hydrolysis (GO:0090305)	0.574254	0.629714	1.18318	TREX1	TREX1
positive regulation of I-kappaB kinase/NF-kappaB signaling (GO:0043123)	0.577954	0.632304	1.03577	PPP5C;CCL21	PPP5C;CCL21
cell morphogenesis involved in neuron differentiation (GO:0048667)	0.579083	0.632304	1.16735	NTNG1	NTNG1
cellular response to hormone stimulus (GO:0032870)	0.579083	0.632304	1.16735	SOST	SOST
establishment of protein localization to organelle (GO:0072594)	0.579083	0.632304	1.16735	SPRN	SPRN
regulation of RNA splicing (GO:0043484)	0.579083	0.632304	1.16735	JMJD6	JMJD6
phospholipid metabolic process (GO:0006644)	0.579083	0.632304	1.16735	PLPP3	PLPP3
protein import into nucleus (GO:0006606)	0.579083	0.632304	1.16735	SPRN	SPRN
protein-containing complex assembly (GO:0065003)	0.583431	0.635583	0.994191	MYC;CAPG;MCU	MYC;CAPG;MCU
import into nucleus (GO:0051170)	0.583858	0.635583	1.15193	SPRN	SPRN
inorganic cation import across plasma membrane (GO:0098659)	0.583858	0.635583	1.15193	TRPV2	TRPV2
positive regulation of phosphatidylinositol 3-kinase signaling (GO:0014068)	0.583858	0.635583	1.15193	PDGFRA	PDGFRA
positive regulation of type I interferon production (GO:0032481)	0.583858	0.635583	1.15193	ISG15	ISG15
protein modification process (GO:0036211)	0.588578	0.639557	1.13691	UBA7	UBA7
negative regulation of apoptotic signaling pathway (GO:2001234)	0.588578	0.639557	1.13691	PELI3	PELI3
negative regulation of blood vessel morphogenesis (GO:2000181)	0.588578	0.639557	1.13691	SERPINF1	SERPINF1
axon development (GO:0061564)	0.593245	0.64346	1.12228	NTNG1	NTNG1
negative regulation of NF-kappaB transcription factor activity (GO:0032088)	0.593245	0.64346	1.12228	NLRC3	NLRC3
positive regulation of proteasomal ubiquitin-dependent protein catabolic process (GO:0032436)	0.593245	0.64346	1.12228	CDC20	CDC20
protein transport (GO:0015031)	0.602229	0.651837	0.958114	TBC1D8B;SCG5;IFT27;APOE	TBC1D8B;SCG5;IFT27;APOE
activation of cysteine-type endopeptidase activity involved in apoptotic process (GO:0006919)	0.602422	0.651837	1.09411	DLC1	DLC1
regulation of interleukin-8 production (GO:0032677)	0.602422	0.651837	1.09411	LBP	LBP
positive regulation of cellular amide metabolic process (GO:0034250)	0.602422	0.651837	1.09411	EPHA4	EPHA4
protein stabilization (GO:0050821)	0.602881	0.65194	0.988549	EPHA4;PLPP3	EPHA4;PLPP3
positive regulation of cellular biosynthetic process (GO:0031328)	0.605918	0.654829	0.982945	CCL21;MYC	CCL21;MYC
cell-cell junction organization (GO:0045216)	0.606933	0.655532	1.08055	CDH11	CDH11
glycoprotein biosynthetic process (GO:0009101)	0.611393	0.659555	1.06732	PMM2	PMM2
positive regulation of plasma membrane bounded cell projection assembly (GO:0120034)	0.611393	0.659555	1.06732	CCL21	CCL21
response to insulin (GO:0032868)	0.615803	0.663115	1.0544	LPIN1	LPIN1
spindle assembly (GO:0051225)	0.615803	0.663115	1.0544	KIFC1	KIFC1
lymphocyte differentiation (GO:0030098)	0.615803	0.663115	1.0544	PLCG2	PLCG2
B cell activation (GO:0042113)	0.620163	0.665414	1.0418	PLCG2	PLCG2
regulation of cell cycle G2/M phase transition (GO:1902749)	0.620163	0.665414	1.0418	TUBA4A	TUBA4A
G1/S transition of mitotic cell cycle (GO:0000082)	0.620163	0.665414	1.0418	MYC	MYC
retrograde vesicle-mediated transport, Golgi to endoplasmic reticulum (GO:0006890)	0.620163	0.665414	1.0418	PLPP3	PLPP3
Wnt signaling pathway, planar cell polarity pathway (GO:0060071)	0.620163	0.665414	1.0418	PRICKLE2	PRICKLE2
positive regulation of protein catabolic process (GO:0045732)	0.620163	0.665414	1.0418	APOE	APOE
regulation of interferon-gamma production (GO:0032649)	0.624473	0.668439	1.02949	ISG15	ISG15
regulation of Ras protein signal transduction (GO:0046578)	0.624473	0.668439	1.02949	DLC1	DLC1
glucose homeostasis (GO:0042593)	0.624473	0.668439	1.02949	MCU	MCU
negative regulation of cellular amide metabolic process (GO:0034249)	0.624473	0.668439	1.02949	APOE	APOE
regulation of transcription from RNA polymerase II promoter in response to stress (GO:0043618)	0.628735	0.672199	1.01747	VEGFA	VEGFA
negative regulation of angiogenesis (GO:0016525)	0.628735	0.672199	1.01747	SERPINF1	SERPINF1
regulation of mitotic cell cycle phase transition (GO:1901990)	0.629582	0.672704	0.940284	CDC20;TUBA4A	CDC20;TUBA4A
positive regulation of neuron projection development (GO:0010976)	0.632948	0.675898	1.00572	APOE	APOE
regulation of mRNA splicing, via spliceosome (GO:0048024)	0.641233	0.683525	0.983021	JMJD6	JMJD6
positive regulation of autophagy (GO:0010508)	0.641233	0.683525	0.983021	FOXO3	FOXO3
positive regulation of binding (GO:0051099)	0.641233	0.683525	0.983021	APOE	APOE
regulation of stem cell differentiation (GO:2000736)	0.645306	0.687457	0.972049	PDGFRA	PDGFRA
cellular response to fibroblast growth factor stimulus (GO:0044344)	0.649332	0.691336	0.961319	NR4A1	NR4A1
visual perception (GO:0007601)	0.653313	0.69475	0.950821	COL1A1	COL1A1
positive regulation of peptidyl-serine phosphorylation (GO:0033138)	0.653313	0.69475	0.950821	VEGFA	VEGFA
interleukin-1-mediated signaling pathway (GO:0070498)	0.657249	0.697695	0.94055	PELI3	PELI3
negative regulation of cell death (GO:0060548)	0.657249	0.697695	0.94055	CCN1	CCN1
negative regulation of cellular protein metabolic process (GO:0032269)	0.657249	0.697695	0.94055	APOE	APOE
regulation of cell cycle phase transition (GO:1901987)	0.66114	0.700582	0.930496	CDC20	CDC20
ciliary basal body-plasma membrane docking (GO:0097711)	0.66114	0.700582	0.930496	TUBA4A	TUBA4A
sensory perception of light stimulus (GO:0050953)	0.66114	0.700582	0.930496	COL1A1	COL1A1
MAPK cascade (GO:0000165)	0.668461	0.707853	0.873274	PDGFRA;PPP5C;MYC	PDGFRA;PPP5C;MYC
calcium ion homeostasis (GO:0055074)	0.668791	0.707853	0.911019	CCL8	CCL8
regulation of angiogenesis (GO:0045765)	0.670957	0.709726	0.869447	SERPINF1;VEGFA	SERPINF1;VEGFA
antigen processing and presentation of exogenous peptide antigen via MHC class II (GO:0019886)	0.672552	0.710158	0.901581	LGMN	LGMN
regulation of peptidyl-serine phosphorylation (GO:0033135)	0.672552	0.710158	0.901581	VEGFA	VEGFA
positive regulation of defense response (GO:0031349)	0.672552	0.710158	0.901581	IFI35	IFI35
response to UV (GO:0009411)	0.676271	0.713664	0.892336	MYC	MYC
antigen processing and presentation of peptide antigen via MHC class II (GO:0002495)	0.679947	0.716012	0.883277	LGMN	LGMN
regulation of transforming growth factor beta receptor signaling pathway (GO:0017015)	0.679947	0.716012	0.883277	SLC2A10	SLC2A10
positive regulation of translation (GO:0045727)	0.679947	0.716012	0.883277	NGRN	NGRN
regulation of gene expression (GO:0010468)	0.680092	0.716012	0.896115	ZNF462;ACTA1;SLC2A10;MYC;PLCG2;TMEM119;MYBL2;APOE;AFF3;LGMN;VEGFA	ZNF462;ACTA1;SLC2A10;MYC;PLCG2;TMEM119;MYBL2;APOE;AFF3;LGMN;VEGFA
cellular response to chemical stress (GO:0062197)	0.683582	0.719264	0.8744	FOXO3	FOXO3
mitotic cell cycle phase transition (GO:0044772)	0.686432	0.720931	0.843987	MYC;TUBA4A	MYC;TUBA4A
protein O-linked glycosylation (GO:0006493)	0.687175	0.720931	0.865699	GALNT10	GALNT10
cell junction assembly (GO:0034329)	0.687175	0.720931	0.865699	CDH11	CDH11
intrinsic apoptotic signaling pathway (GO:0097193)	0.687175	0.720931	0.865699	IFI6	IFI6
positive regulation of vasculature development (GO:1904018)	0.687175	0.720931	0.865699	VEGFA	VEGFA
antigen processing and presentation of exogenous peptide antigen (GO:0002478)	0.690728	0.724235	0.857168	LGMN	LGMN
cellular macromolecule biosynthetic process (GO:0034645)	0.691779	0.724914	0.84191	PPP5C;TREX1;APOE	PPP5C;TREX1;APOE
phosphate-containing compound metabolic process (GO:0006796)	0.693945	0.726645	0.831803	PLCG2;PLPP3	PLCG2;PLPP3
cellular metal ion homeostasis (GO:0006875)	0.694241	0.726645	0.848803	CCL8	CCL8
small GTPase mediated signal transduction (GO:0007264)	0.701148	0.733019	0.83255	RRAD	RRAD
positive regulation of protein serine/threonine kinase activity (GO:0071902)	0.701148	0.733019	0.83255	VEGFA	VEGFA
regulation of cell growth (GO:0001558)	0.706136	0.737803	0.812251	FRZB;SPOCK1	FRZB;SPOCK1
cellular response to oxygen-containing compound (GO:1901701)	0.709929	0.741335	0.817853	PDGFRA;FOS;LBP	PDGFRA;FOS;LBP
cellular response to lipid (GO:0071396)	0.710898	0.741817	0.804682	SPP1;LBP	SPP1;LBP
regulation of protein ubiquitination (GO:0031396)	0.711218	0.741817	0.8093	ISG15	ISG15
response to endoplasmic reticulum stress (GO:0034976)	0.714499	0.744807	0.801835	ALOX15	ALOX15
transcription, DNA-templated (GO:0006351)	0.715596	0.745517	0.797252	PPP5C;FOXO3	PPP5C;FOXO3
cellular divalent inorganic cation homeostasis (GO:0072503)	0.717743	0.74732	0.794505	CCL8	CCL8
protein-containing complex subunit organization (GO:0043933)	0.720951	0.749789	0.787307	CAPG	CAPG
phosphatidylinositol metabolic process (GO:0046488)	0.720951	0.749789	0.787307	PLCG2	PLCG2
activation of protein kinase activity (GO:0032147)	0.727257	0.755471	0.773294	VEGFA	VEGFA
histone modification (GO:0016570)	0.727257	0.755471	0.773294	PADI1	PADI1
cellular response to lectin (GO:1990858)	0.730357	0.756938	0.766472	PLCG2	PLCG2
cellular response to molecule of bacterial origin (GO:0071219)	0.730357	0.756938	0.766472	LBP	LBP
stimulatory C-type lectin receptor signaling pathway (GO:0002223)	0.730357	0.756938	0.766472	PLCG2	PLCG2
positive regulation of protein metabolic process (GO:0051247)	0.730357	0.756938	0.766472	APOE	APOE
positive regulation of cell projection organization (GO:0031346)	0.736451	0.762814	0.75318	APOE	APOE
adenylate cyclase-activating G protein-coupled receptor signaling pathway (GO:0007189)	0.739447	0.765474	0.746705	ADGRD1	ADGRD1
innate immune response activating cell surface receptor signaling pathway (GO:0002220)	0.742408	0.768097	0.740339	PLCG2	PLCG2
cellular response to lipopolysaccharide (GO:0071222)	0.745337	0.770682	0.73408	LBP	LBP
potassium ion transport (GO:0006813)	0.751094	0.776188	0.721873	KCNK3	KCNK3
synapse organization (GO:0050808)	0.762223	0.785878	0.698631	NTNG1	NTNG1
negative regulation of cell growth (GO:0030308)	0.762223	0.785878	0.698631	FRZB	FRZB
negative regulation of growth (GO:0045926)	0.762223	0.785878	0.698631	FRZB	FRZB
phosphatidylinositol biosynthetic process (GO:0006661)	0.762223	0.785878	0.698631	PLCG2	PLCG2
cellular response to insulin stimulus (GO:0032869)	0.770243	0.793235	0.682153	LPIN1	LPIN1
DNA-dependent DNA replication (GO:0006261)	0.770243	0.793235	0.682153	BAZ1A	BAZ1A
G2/M transition of mitotic cell cycle (GO:0000086)	0.772856	0.795014	0.67683	TUBA4A	TUBA4A
positive regulation of canonical Wnt signaling pathway (GO:0090263)	0.772856	0.795014	0.67683	COL1A1	COL1A1
cell cycle G2/M phase transition (GO:0044839)	0.775439	0.797214	0.67159	TUBA4A	TUBA4A
regulation of cell motility (GO:2000145)	0.780519	0.801977	0.661347	CCL21	CCL21
negative regulation of inflammatory response to antigenic stimulus (GO:0002862)	0.787925	0.80866	0.646551	PLCG2	PLCG2
organic substance transport (GO:0071702)	0.787925	0.80866	0.646551	SLC22A3	SLC22A3
negative regulation of transcription by RNA polymerase II (GO:0000122)	0.789026	0.809327	0.768142	MYC;ZBTB16;AEBP1;FOXO3;CRYM;VEGFA	MYC;ZBTB16;AEBP1;FOXO3;CRYM;VEGFA
regulation of inflammatory response to antigenic stimulus (GO:0002861)	0.790337	0.810209	0.641765	PLCG2	PLCG2
transcription initiation from RNA polymerase II promoter (GO:0006367)	0.797413	0.816996	0.627818	NR4A1	NR4A1
Ras protein signal transduction (GO:0007265)	0.801998	0.821224	0.618849	COL1A2	COL1A2
protein-DNA complex assembly (GO:0065004)	0.804251	0.822592	0.61446	TCF4	TCF4
negative regulation of DNA-binding transcription factor activity (GO:0043433)	0.804251	0.822592	0.61446	NLRC3	NLRC3
protein deubiquitination (GO:0016579)	0.807068	0.825003	0.657311	CDC20;MYC	CDC20;MYC
positive regulation of cytosolic calcium ion concentration (GO:0007204)	0.813012	0.830606	0.597504	PDGFRA	PDGFRA
protein phosphorylation (GO:0006468)	0.815001	0.831833	0.706145	EPHA4;PDGFRA;ACVR1C;DCLK1	EPHA4;PDGFRA;ACVR1C;DCLK1
regulation of cytosolic calcium ion concentration (GO:0051480)	0.815141	0.831833	0.593409	PDGFRA	PDGFRA
regulation of G2/M transition of mitotic cell cycle (GO:0010389)	0.817245	0.833507	0.589369	TUBA4A	TUBA4A
cellular response to organic cyclic compound (GO:0071407)	0.819326	0.835154	0.585384	SPP1	SPP1
protein modification by small protein removal (GO:0070646)	0.821578	0.836974	0.635428	CDC20;MYC	CDC20;MYC
DNA metabolic process (GO:0006259)	0.823129	0.838078	0.633084	TOP2A;TREX1	TOP2A;TREX1
plasma membrane bounded cell projection assembly (GO:0120031)	0.824667	0.839168	0.630758	CCL21;EMP3	CCL21;EMP3
positive regulation of Wnt signaling pathway (GO:0030177)	0.825427	0.839465	0.573743	COL1A1	COL1A1
T cell receptor signaling pathway (GO:0050852)	0.835144	0.848866	0.555329	PLCG2	PLCG2
response to lipopolysaccharide (GO:0032496)	0.837022	0.850293	0.551786	LBP	LBP
protein modification by small protein conjugation (GO:0032446)	0.844037	0.856934	0.641764	RNF213;UBA7;ISG15	RNF213;UBA7;ISG15
double-strand break repair (GO:0006302)	0.846095	0.858538	0.534724	PPP5C	PPP5C
regulation of transcription, DNA-templated (GO:0006355)	0.849053	0.861052	0.808775	ZBTB16;EBF2;ZBTB20;BHLHA15;FOS;BAZ1A;FOXO3;HMGB4;JMJD6;VEGFA;COL1A1;NR4A1;MYC;SPP1;TNNI2;TCF4;MYBL2;APOE;ZNF699;SOST;JUNB	ZBTB16;EBF2;ZBTB20;BHLHA15;FOS;BAZ1A;FOXO3;HMGB4;JMJD6;VEGFA;COL1A1;NR4A1;MYC;SPP1;TNNI2;TCF4;MYBL2;APOE;ZNF699;SOST;JUNB
DNA-templated transcription, initiation (GO:0006352)	0.852991	0.864096	0.52181	NR4A1	NR4A1
DNA repair (GO:0006281)	0.853018	0.864096	0.587536	PPP5C;TREX1	PPP5C;TREX1
chemical synaptic transmission (GO:0007268)	0.863144	0.87386	0.57184	APOE;KCNK3	APOE;KCNK3
mitochondrion organization (GO:0007005)	0.864326	0.874563	0.500639	SLC25A36	SLC25A36
regulation of translation (GO:0006417)	0.868913	0.878709	0.492078	FOXO3	FOXO3
protein polyubiquitination (GO:0000209)	0.87263	0.881474	0.556948	RNF213;PELI3	RNF213;PELI3
cilium assembly (GO:0060271)	0.87263	0.881474	0.556948	IFT27;TUBA4A	IFT27;TUBA4A
antigen receptor-mediated signaling pathway (GO:0050851)	0.879026	0.887435	0.473188	PLCG2	PLCG2
proteasome-mediated ubiquitin-dependent protein catabolic process (GO:0043161)	0.880432	0.888355	0.544531	CDC20;ECRG4	CDC20;ECRG4
endomembrane system organization (GO:0010256)	0.896979	0.904542	0.439416	OTOF	OTOF
ubiquitin-dependent protein catabolic process (GO:0006511)	0.911614	0.918784	0.492644	CDC20;RNF213	CDC20;RNF213
regulation of autophagy (GO:0010506)	0.92867	0.935449	0.377662	FOXO3	FOXO3
membrane organization (GO:0061024)	0.937146	0.943457	0.360221	OTOF	OTOF
protein ubiquitination (GO:0016567)	0.938376	0.943837	0.49616	RNF213;PELI3;ISG15	RNF213;PELI3;ISG15
anterograde trans-synaptic signaling (GO:0098916)	0.938576	0.943837	0.35722	KCNK3	KCNK3
phosphorylation (GO:0016310)	0.942586	0.947339	0.434673	ACVR1C;DCLK1	ACVR1C;DCLK1
cellular component assembly (GO:0022607)	0.949492	0.953745	0.333573	CAPG	CAPG
organelle assembly (GO:0070925)	0.954784	0.958524	0.408456	CORO1A;DLGAP5	CORO1A;DLGAP5
negative regulation of transcription, DNA-templated (GO:0045892)	0.959838	0.963059	0.545223	MYC;ZBTB16;AEBP1;FOXO3;CRYM;VEGFA	MYC;ZBTB16;AEBP1;FOXO3;CRYM;VEGFA
regulation of cellular macromolecule biosynthetic process (GO:2000112)	0.970205	0.972917	0.369942	MYBL2;FOXO3	MYBL2;FOXO3
transcription by RNA polymerase II (GO:0006366)	0.974421	0.976599	0.271055	NR4A1	NR4A1
gene expression (GO:0010467)	0.983128	0.984775	0.243117	PPP5C	PPP5C
regulation of nucleic acid-templated transcription (GO:1903506)	0.992844	0.993952	0.200414	MYBL2	MYBL2
negative regulation of nucleic acid-templated transcription (GO:1903507)	0.99518	0.995735	0.185371	ZBTB16	ZBTB16
negative regulation of cellular macromolecule biosynthetic process (GO:2000113)	0.998167	0.998167	0.156516	ZBTB16	ZBTB16

## Sheet: KEGG_Down
Supplementary File S3. Functional enrichment analysis results of down-regulated genes in fat-tailed breed. Marked cells are significant terms (Blue at p-value <0.05 and Yellow at FDR<0.05).
Term	P-value	Adjusted P-value	Odds Ratio	Genes Down
ECM-receptor interaction	5.81619e-08	1.19813e-05	11.6904	COL1A1;COL1A2;ITGA2;ITGA1;TNC;COL4A6;SPP1;COL6A3;SDC1;COL6A6
Focal adhesion	1.88568e-05	0.00152558	5.27354	COL1A1;PDGFRA;COL1A2;ITGA2;ITGA1;SPP1;TNC;COL4A6;COL6A3;COL6A6;VEGFA
Protein digestion and absorption	2.22171e-05	0.00152558	7.60174	COL1A1;COL3A1;COL1A2;COL5A1;COL4A6;COL21A1;COL6A3;COL6A6
PI3K-Akt signaling pathway	5.38598e-05	0.00277378	3.77464	PDGFRA;ITGA2;ITGA1;TNC;FOXO3;VEGFA;COL1A1;NR4A1;COL1A2;MYC;SPP1;COL4A6;COL6A3;COL6A6
AGE-RAGE signaling pathway in diabetic complications	0.000140834	0.00580238	6.76423	COL1A1;COL3A1;COL1A2;MMP2;COL4A6;PLCG2;VEGFA
Relaxin signaling pathway	0.000667593	0.0229207	5.14874	COL1A1;COL3A1;COL1A2;MMP2;COL4A6;FOS;VEGFA
Human papillomavirus infection	0.00142126	0.0418256	3.11038	COL1A1;COL1A2;ITGA2;ITGA1;SPP1;TNC;COL4A6;COL6A3;ISG15;COL6A6;VEGFA
Proteoglycans in cancer	0.00236358	0.0608622	3.64681	COL1A1;COL1A2;MYC;ITGA2;MMP2;PLCG2;SDC1;VEGFA
Biosynthesis of unsaturated fatty acids	0.003409	0.0780282	11.0706	SCD;SCD5;ELOVL6
Aldosterone synthesis and secretion	0.0051122	0.101717	4.78787	NR4A1;DAGLA;CACNA1D;KCNK3;CACNA1G
Calcium signaling pathway	0.00610015	0.101717	3.09111	PDGFRA;P2RX6;TNNC2;PLCG2;CACNA1D;MCU;VEGFA;CACNA1G
Cortisol synthesis and secretion	0.00627467	0.101717	5.82277	NR4A1;CACNA1D;KCNK3;CACNA1G
MAPK signaling pathway	0.00641904	0.101717	2.83614	PDGFRA;NR4A1;PPP5C;DUSP1;MYC;CACNA1D;FOS;VEGFA;CACNA1G
Bladder cancer	0.0110672	0.162846	6.98702	MYC;MMP2;VEGFA
Platelet activation	0.0134111	0.184178	3.73683	COL1A1;COL3A1;COL1A2;ITGA2;PLCG2
Hypertrophic cardiomyopathy	0.0190593	0.238247	4.12487	ITGA2;ITGA1;CACNA1D;MYH7
Fluid shear stress and atherosclerosis	0.020941	0.238247	3.316	DUSP1;MMP2;SDC1;FOS;VEGFA
Steroid biosynthesis	0.0211283	0.238247	9.7996	DHCR24;LSS
TGF-beta signaling pathway	0.0219742	0.238247	3.94074	GREM1;ACVR1C;MYC;FMOD
Dilated cardiomyopathy	0.0235283	0.242341	3.85468	ITGA2;ITGA1;CACNA1D;MYH7
Choline metabolism in cancer	0.0251475	0.246685	3.77228	PDGFRA;SLC22A3;FOS;PLPP3
Cell adhesion molecules	0.026566	0.248755	3.10588	NTNG1;CNTNAP1;VCAN;CNTN1;SDC1
Amoebiasis	0.0285832	0.256006	3.61758	COL1A1;COL3A1;COL1A2;COL4A6
Cellular senescence	0.0323062	0.277295	2.94013	MYC;CACNA1D;MYBL2;FOXO3;MCU
GnRH secretion	0.0358445	0.295359	4.3475	SPP1;CACNA1D;CACNA1G
Growth hormone synthesis, secretion and action	0.0461734	0.365836	3.08014	PLCG2;CACNA1D;FOS;JUNB
PPAR signaling pathway	0.0514358	0.392436	3.73328	SCD;SCD5;SLC27A2
Arrhythmogenic right ventricular cardiomyopathy	0.0566561	0.416827	3.58138	ITGA2;ITGA1;CACNA1D
Alanine, aspartate and glutamate metabolism	0.0654004	0.454571	5.03546	ALDH4A1;GPT2
Chemokine signaling pathway	0.067221	0.454571	2.36976	PREX1;CCL8;CCL21;PLCG2;FOXO3
Kaposi sarcoma-associated herpesvirus infection	0.0684064	0.454571	2.35703	PREX1;MYC;PLCG2;FOS;VEGFA
Complement and coagulation cascades	0.0717405	0.46183	3.23067	SERPINF2;F13A1;MASP1
Ferroptosis	0.0782245	0.484697	4.51809	GSS;ALOX15
Pathways in cancer	0.0799986	0.484697	1.71083	PDGFRA;MYC;ZBTB16;MMP2;ITGA2;PLCG2;COL4A6;FOS;DLL1;VEGFA
Small cell lung cancer	0.0862525	0.507658	2.97551	MYC;ITGA2;COL4A6
Type II diabetes mellitus	0.0952398	0.512917	4.00365	CACNA1D;CACNA1G
Circadian entrainment	0.0973165	0.512917	2.81653	CACNA1D;FOS;CACNA1G
Cushing syndrome	0.0991759	0.512917	2.34151	NR4A1;CACNA1D;KCNK3;CACNA1G
Glycerophospholipid metabolism	0.0995955	0.512917	2.78674	PHOSPHO1;PLPP3;LPIN1
Inflammatory mediator regulation of TRP channels	0.0995955	0.512917	2.78674	PLCG2;TRPV2;ASIC3
Sphingolipid metabolism	0.105909	0.532128	3.74753	SPTLC3;PLPP3
NF-kappa B signaling pathway	0.113709	0.544746	2.62039	CCL21;PLCG2;LBP
Toll-like receptor signaling pathway	0.113709	0.544746	2.62039	SPP1;LBP;FOS
Cytokine-cytokine receptor interaction	0.118498	0.546169	1.83879	CCL8;ACVR1C;TNFRSF13B;CCL21;TNFRSF9;IL13RA2
Wnt signaling pathway	0.119309	0.546169	2.18129	MYC;SERPINF1;PRICKLE2;SOST
Coronavirus disease	0.123362	0.552315	1.94819	PLCG2;F13A1;ISG15;FOS;MASP1
HIF-1 signaling pathway	0.126014	0.552315	2.49615	PLCG2;TIMP1;VEGFA
Chemical carcinogenesis	0.134916	0.568582	1.88924	MYC;CACNA1D;FOS;DLL1;VEGFA
Serotonergic synapse	0.136186	0.568582	2.40489	DUSP1;ALOX15;CACNA1D
Endometrial cancer	0.139609	0.568582	3.14381	MYC;FOXO3
VEGF signaling pathway	0.143485	0.568582	3.0885	PLCG2;VEGFA
Arachidonic acid metabolism	0.151305	0.568582	2.9835	ALOX15;CBR3
Glycerolipid metabolism	0.151305	0.568582	2.9835	PLPP3;LPIN1
Axon guidance	0.151419	0.568582	1.9836	NTNG1;EPHA4;PLCG2;NGEF
AMPK signaling pathway	0.154629	0.568582	2.2602	SCD;SCD5;FOXO3
Thiamine metabolism	0.156778	0.568582	6.27302	AK4
Thyroid hormone signaling pathway	0.157326	0.568582	2.24094	MYC;PLCG2;MYH7
Osteoclast differentiation	0.173801	0.61181	2.13185	PLCG2;FOS;JUNB
Acute myeloid leukemia	0.175227	0.61181	2.70728	MYC;ZBTB16
Purine metabolism	0.179398	0.612782	2.0978	AK4;PDE5A;APRT
Amphetamine addiction	0.183331	0.612782	2.6262	CACNA1D;FOS
Central carbon metabolism in cancer	0.187404	0.612782	2.58745	PDGFRA;MYC
Prolactin signaling pathway	0.187404	0.612782	2.58745	FOS;FOXO3
Non-small cell lung cancer	0.195587	0.627018	2.51327	PLCG2;FOXO3
Diabetic cardiomyopathy	0.197846	0.627018	1.77238	COL1A1;COL3A1;COL1A2;MMP2
Estrogen signaling pathway	0.202251	0.631269	1.97176	KRT18;MMP2;FOS
Glioma	0.207941	0.63934	2.40961	PDGFRA;PLCG2
Arginine biosynthesis	0.221314	0.662092	4.18053	GPT2
Breast cancer	0.231693	0.662092	1.83389	MYC;FOS;DLL1
B cell receptor signaling pathway	0.232866	0.662092	2.22593	PLCG2;FOS
Regulation of actin cytoskeleton	0.233334	0.662092	1.64688	PDGFRA;DIAPH3;ITGA2;ITGA1
Phospholipase D signaling pathway	0.234681	0.662092	1.82115	PDGFRA;PLCG2;PLPP3
Phagosome	0.2467	0.662092	1.7719	ITGA2;CORO1A;TUBA4A
ErbB signaling pathway	0.249586	0.662092	2.11822	MYC;PLCG2
Colorectal cancer	0.253772	0.662092	2.0929	MYC;FOS
Maturity onset diabetes of the young	0.255958	0.662092	3.51093	BHLHA15
Cardiac muscle contraction	0.257961	0.662092	2.06817	CACNA1D;MYH7
Gap junction	0.26215	0.662092	2.04402	PDGFRA;TUBA4A
Fatty acid elongation	0.264377	0.662092	3.37573	ELOVL6
GABAergic synapse	0.26634	0.662092	2.02042	SLC6A12;CACNA1D
Butanoate metabolism	0.2727	0.662092	3.25053	L2HGDH
MicroRNAs in cancer	0.273823	0.662092	1.44418	PDGFRA;MYC;PLCG2;TNC;VEGFA
JAK-STAT signaling pathway	0.277123	0.662092	1.65962	PDGFRA;MYC;IL13RA2
Th1 and Th2 cell differentiation	0.278907	0.662092	1.95278	FOS;DLL1
Hippo signaling pathway	0.280188	0.662092	1.64916	CRB2;RASSF4;MYC
Linoleic acid metabolism	0.28093	0.662092	3.13429	ALOX15
GnRH signaling pathway	0.283094	0.662092	1.93122	MMP2;CACNA1D
Rheumatoid arthritis	0.283094	0.662092	1.93122	FOS;VEGFA
Citrate cycle	0.289068	0.289068	3.02605	3.75562
Staphylococcus aureus infection	0.29146	0.662092	1.8895	KRT18;MASP1
cGMP-PKG signaling pathway	0.292478	0.662092	1.60861	CACNA1D;PDE5A;MYH7
Fc gamma R-mediated phagocytosis	0.299814	0.671323	1.84953	PLCG2;PLPP3
Hematopoietic cell lineage	0.308152	0.671503	1.81121	ITGA2;ITGA1
Parkinson disease	0.310591	0.671503	1.43622	UBA7;DUSP1;TUBA4A;MCU
Viral protein interaction with cytokine and cytokine receptor	0.312314	0.671503	1.79264	CCL8;CCL21
Fructose and mannose metabolism	0.312933	0.671503	2.74194	PMM2
Mucin type O-glycan biosynthesis	0.336002	0.701567	2.50654	GALNT10
Starch and sucrose metabolism	0.336002	0.701567	2.50654	PYGM
Parathyroid hormone synthesis, secretion and action	0.337161	0.701567	1.6887	SOST;FOS
Thyroid cancer	0.343518	0.704451	2.43679	MYC
Insulin resistance	0.345386	0.704451	1.65667	PYGM;SLC27A2
Primary immunodeficiency	0.35095	0.708782	2.37081	TNFRSF13B
TNF signaling pathway	0.361735	0.723469	1.5961	FOS;JUNB
Cholinergic synapse	0.365799	0.724563	1.58164	CACNA1D;FOS
Leukocyte transendothelial migration	0.369853	0.725616	1.56744	MMP2;PLCG2
Fat digestion and absorption	0.386872	0.743821	2.08804	PLPP3
Porphyrin and chlorophyll metabolism	0.386872	0.743821	2.08804	HEPHL1
Neurotrophin signaling pathway	0.389964	0.743821	1.50008	PLCG2;FOXO3
Epstein-Barr virus infection	0.400133	0.744796	1.32332	MYC;PLCG2;ISG15
Cell cycle	0.409787	0.744796	1.43823	CDC20;MYC
Carbohydrate digestion and absorption	0.414179	0.744796	1.90609	CACNA1D
Other types of O-glycan biosynthesis	0.414179	0.744796	1.90609	GALNT10
Amino sugar and nucleotide sugar metabolism	0.420814	0.744796	1.86544	PMM2
Intestinal immune network for IgA production	0.420814	0.744796	1.86544	TNFRSF13B
Ether lipid metabolism	0.427375	0.744796	1.82648	PLPP3
Arginine and proline metabolism	0.433862	0.744796	1.78912	ALDH4A1
Cholesterol metabolism	0.433862	0.744796	1.78912	APOE
Cysteine and methionine metabolism	0.433862	0.744796	1.78912	GSS
Malaria	0.433862	0.744796	1.78912	SDC1
Vibrio cholerae infection	0.433862	0.744796	1.78912	PLCG2
Dopaminergic synapse	0.440833	0.750508	1.34918	CACNA1D;FOS
Human T-cell leukemia virus 1 infection	0.451036	0.761585	1.21811	CDC20;MYC;FOS
Human cytomegalovirus infection	0.468592	0.76256	1.18483	PDGFRA;MYC;VEGFA
Ubiquitin mediated proteolysis	0.470965	0.76256	1.27045	CDC20;UBA7
Hedgehog signaling pathway	0.471273	0.76256	1.59345	EVC
Glutathione metabolism	0.477264	0.76256	1.56492	GSS
Apoptosis	0.478347	0.76256	1.25217	FOS;TUBA4A
Signaling pathways regulating pluripotency of stem cells	0.482014	0.76256	1.24322	ACVR1C;MYC
Ras signaling pathway	0.488755	0.76256	1.1482	PDGFRA;PLCG2;VEGFA
Notch signaling pathway	0.489045	0.76256	1.5108	DLL1
Mineral absorption	0.494836	0.76256	1.48512	HEPHL1
Viral myocarditis	0.494836	0.76256	1.48512	MYH7
Retrograde endocannabinoid signaling	0.50011	0.76256	1.20034	DAGLA;CACNA1D
Adrenergic signaling in cardiomyocytes	0.507234	0.76256	1.184	CACNA1D;MYH7
Cytosolic DNA-sensing pathway	0.511819	0.76256	1.41305	TREX1
Oxytocin signaling pathway	0.521284	0.76256	1.15261	CACNA1D;FOS
Hepatitis C	0.531646	0.76256	1.13013	RSAD2;MYC
Salmonella infection	0.536103	0.76256	1.06792	MYC;FOS;TUBA4A
Necroptosis	0.538468	0.76256	1.11562	ALOX15;PYGM
Fc epsilon RI signaling pathway	0.538871	0.76256	1.30726	PLCG2
Mitophagy	0.538871	0.76256	1.30726	FOXO3
Retinol metabolism	0.538871	0.76256	1.30726	BCO1
Renal cell carcinoma	0.5441	0.76256	1.28797	VEGFA
Renin secretion	0.5441	0.76256	1.28797	CACNA1D
Hepatitis B	0.548574	0.76256	1.09453	MYC;FOS
Epithelial cell signaling in Helicobacter pylori infection	0.549269	0.76256	1.26924	PLCG2
RIG-I-like receptor signaling pathway	0.549269	0.76256	1.26924	ISG15
Melanoma	0.559434	0.76256	1.23336	PDGFRA
Inositol phosphate metabolism	0.56443	0.76256	1.21617	PLCG2
p53 signaling pathway	0.56443	0.76256	1.21617	ZMAT3
Hepatocellular carcinoma	0.568318	0.76256	1.05465	MYC;PLCG2
Tight junction	0.571547	0.76256	1.04828	CACNA1D;TUBA4A
Chronic myeloid leukemia	0.579083	0.76256	1.16735	MYC
Metabolism of xenobiotics by cytochrome P450	0.579083	0.76256	1.16735	CBR3
Pancreatic cancer	0.579083	0.76256	1.16735	VEGFA
Pertussis	0.579083	0.76256	1.16735	FOS
Leishmaniasis	0.583858	0.76256	1.15193	FOS
Antigen processing and presentation	0.588578	0.76256	1.13691	LGMN
Synaptic vesicle cycle	0.588578	0.76256	1.13691	SLC6A12
Prion disease	0.598515	0.764884	0.971799	CACNA1D;TUBA4A;MCU
Alzheimer disease	0.602229	0.764884	0.958114	CACNA1D;APOE;TUBA4A;MCU
Tuberculosis	0.605918	0.764884	0.982945	LBP;CORO1A
Peroxisome	0.606933	0.764884	1.08055	SLC27A2
NOD-like receptor signaling pathway	0.608937	0.764884	0.977404	TRPV2;MCU
Insulin secretion	0.624473	0.776057	1.02949	CACNA1D
Pathways of neurodegeneration	0.625367	0.776057	0.929238	DNAH1;UBA7;CACNA1D;TUBA4A;MCU
PD-L1 expression and PD-1 checkpoint pathway in cancer	0.637114	0.785902	0.994242	FOS
Transcriptional misregulation in cancer	0.640995	0.785982	0.920301	MYC;ZBTB16
Pathogenic Escherichia coli infection	0.654871	0.796431	0.896474	FOS;TUBA4A
IL-17 signaling pathway	0.657249	0.796431	0.94055	FOS
Phosphatidylinositol signaling system	0.668791	0.79745	0.911019	PLCG2
Prostate cancer	0.668791	0.79745	0.911019	PDGFRA
Chagas disease	0.687175	0.79745	0.865699	FOS
Longevity regulating pathway	0.687175	0.79745	0.865699	FOXO3
Rap1 signaling pathway	0.688953	0.79745	0.839887	PDGFRA;VEGFA
Human immunodeficiency virus 1 infection	0.693945	0.79745	0.831803	PLCG2;FOS
C-type lectin receptor signaling pathway	0.694241	0.79745	0.848803	PLCG2
T cell receptor signaling pathway	0.694241	0.79745	0.848803	FOS
Lipid and atherosclerosis	0.701308	0.79745	0.819961	FOS;LBP
cAMP signaling pathway	0.70373	0.79745	0.816088	CACNA1D;FOS
Glucagon signaling pathway	0.704543	0.79745	0.824654	PYGM
Th17 cell differentiation	0.704543	0.79745	0.824654	FOS
Glutamatergic synapse	0.727257	0.818661	0.773294	CACNA1D
Sphingolipid signaling pathway	0.742408	0.831175	0.740339	SPTLC3
Lysosome	0.7676	0.839224	0.687559	LGMN
Shigellosis	0.769091	0.839224	0.714652	PLCG2;FOXO3
Oocyte meiosis	0.770243	0.839224	0.682153	CDC20
FoxO signaling pathway	0.775439	0.839224	0.67159	FOXO3
Natural killer cell mediated cytotoxicity	0.775439	0.839224	0.67159	PLCG2
Vascular smooth muscle contraction	0.780519	0.839224	0.661347	CACNA1D
Amyotrophic lateral sclerosis	0.782348	0.839224	0.723439	DNAH1;TUBA4A;MCU
Apelin signaling pathway	0.790337	0.839224	0.641765	SPP1
Insulin signaling pathway	0.790337	0.839224	0.641765	PYGM
Yersinia infection	0.790337	0.839224	0.641765	FOS
Measles	0.795081	0.839932	0.632399	FOS
Spinocerebellar ataxia	0.804251	0.845284	0.61446	MCU
Gastric cancer	0.817245	0.854582	0.589369	MYC
mTOR signaling pathway	0.827415	0.858555	0.569964	LPIN1
Non-alcoholic fatty liver disease	0.829381	0.858555	0.566234	FOS
Influenza A	0.859579	0.884615	0.5095	RSAD2
Huntington disease	0.863144	0.884615	0.57184	DNAH1;TUBA4A
Neutrophil extracellular trap formation	0.884451	0.901965	0.463026	PLCG2
Viral carcinogenesis	0.901603	0.914927	0.430627	CDC20
Endocytosis	0.943978	0.953233	0.345693	PDGFRA
Neuroactive ligand-receptor interaction	0.979932	0.984712	0.254039	P2RX6
Herpes simplex virus 1 infection	0.996755	0.996755	0.172385	ZNF699
